# Supplementary material
Source: PubMed Central journal article supplement (PMC3985688)

# Tungsten-Catalyzed Asymmetric Epoxidation of Allylic and Homoallylic alcohols with Hydrogen Peroxide

Chuan Wang,<sup>†</sup> and Hisashi Yamamoto<sup>\*†,‡</sup>

<sup>†</sup> Department of Chemistry, the University of Chicago, 5735 South Ellis Avenue, 60637 Chicago, Illinois, USA

<sup>‡</sup> Molecular Catalyst Research Center, Chubu University, 1200 Matsumoto, Kasugai, Aichi, 487-8501, Japan

## Supporting Information

|                                                                                                                                     |         |
|-------------------------------------------------------------------------------------------------------------------------------------|---------|
| General Methods and Materials .....                                                                                                 | 2       |
| General Procedure for Synthesis of the <b>BHA-3</b> and <b>5</b> .....                                                              | 3-5     |
| Procedure for Synthesis of Allylic Alcohols <b>1o</b> , <b>1u</b> , <b>1v</b> and Homoallylic Alcohol <b>3g</b> , <b>3h</b> .....   | 6-9     |
| General Procedure for the Epoxidation of Allylic and Homoallylic Alcohols .....                                                     | 10      |
| Characterization of <b>2a-p</b> , <b>2u</b> and <b>2v</b> .....                                                                     | 10-14   |
| Characterization of <b>4a-h</b> .....                                                                                               | 14-16   |
| Procedure for the Kinetic Resolution of Racemic $\alpha$ -Vinyl Benzyl Alcohol <i>rac-5</i> .....                                   | 16      |
| Characterization of <b>5</b> and <b>6</b> .....                                                                                     | 17      |
| HPLC and GC-data .....                                                                                                              | 18-21   |
| Detailed Reaction Conditions for the Investigation of Chemoselectivity of Different Types of Allylic and Homoallylic Alcohols ..... | 22      |
| References .....                                                                                                                    | 23      |
| <sup>1</sup> H and <sup>13</sup> C-spectra.....                                                                                     | 24-100  |
| HPLC and GC-Spectra .....                                                                                                           | 101-126 |

## General Methods and Materials

Infrared (IR) spectra were measured on a Thermo Nicolet 670 mid-FTIR with film. High resolution mass spectra were acquired on a Agilent 6224 ToF-MS with 1290 UHPLC.  $^1\text{H}$ - and  $^{13}\text{C}$ - NMR spectra were recorded on Bruker DMX Model 500 spectrometer at ambient temperature in  $\text{CDCl}_3$  at 500 and 126 MHz. The chemical shifts are given in ppm relative to tetramethylsilane [ $^1\text{H}$ :  $\delta(\text{SiMe}_4) = 0.00$  ppm] as an internal standard or relative to the resonance of the solvent [ $^{13}\text{C}$ :  $\delta(\text{CDCl}_3) = 77.16$  ppm]. Multiplicities are indicated as s (singlet), d (doublet), t (triplet), q (quartet), m (multiplet) and br (broad). HPLC was performed on a Varian ProStar Series equipped with a variable wavelength detector using chiral stationary phases (Chiracel OD-H, OJ-H, OB-H and Chiralpak IA, IB, IC 0.46 cm x 25 cm) from Daicel. Optical rotations were taken on a Perkin-Elmer 141 polarimeter. Analytical thin-layer chromatography (TLC) was performed on Merck pre-coated TLC plates (silica gel 60 GF254, 0.25 mm). Flash chromatography was performed on silica gel E. Merck 9385 or silica gel 60 extra pure.

Ligands BHA-1, BHA-2, BHA-4,<sup>1</sup> the alcohols **1d**,<sup>2</sup> **1g**,<sup>3</sup> **1i**,<sup>4</sup> **1m**,<sup>5</sup> **3f**,<sup>6</sup> and  $\text{WO}_2(\text{acac})_2$ <sup>7</sup> were prepared according to the known procedures. All other reagents and starting materials, unless otherwise noted, were purchased from commercial vendors and used without further purification.

## General Procedure and Characterization

### General Procedure for Synthesis of the Triarylmethanols

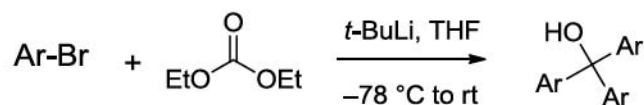

To a solution of aryl bromide (12 mmol) in tetrahydrofuran (50 mL) under Nitrogen at  $-78\text{ }^\circ\text{C}$  was added *t*BuLi (24 mmol, 14.1 mL, 1.7 M solution in pentane) slowly. The reaction was allowed to warm up to rt. Then diethyl carbonate (0.47 g, 0.49 mL, 4 mmol) was added to the mixture slowly. After 1 h the reaction was quenched by adding water and the aqueous layer was extracted with Et<sub>2</sub>O. The combined organic layers were washed brine (100 mL), dried over MgSO<sub>4</sub>, filtered and evaporated under reduced pressure. The crude product was purified through column chromatography on silica gel.

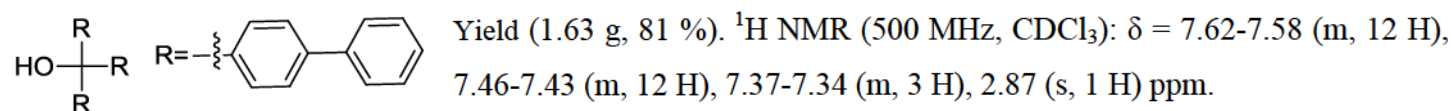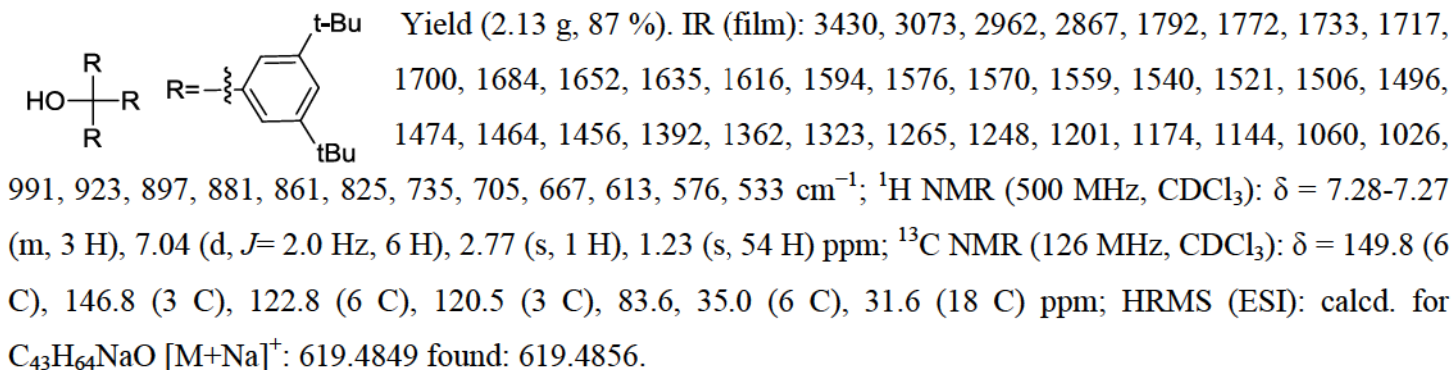

### General Procedure for Synthesis of the Triaryl Carboxylic Acids

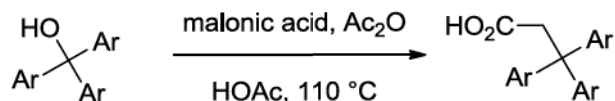

To a solution of and malonic acid (1.04 g, 30 mol) in Ac<sub>2</sub>O (6 mL) and acetic acid (30 mL) was added a mixture of the triaryl methanol (3.0 mmol) and malonic acid (1.04 g, 30 mol) portion wise at 110 °C. Additional

malonic acid (1.04 g, 30 mol) was then added followed by acetic acid (15 mL). After 1.5 h the mixture was cooled down to r.t. and then poured into saturated aqueous KOH solution. The precipitate was filtered and then purified through column chromatography.

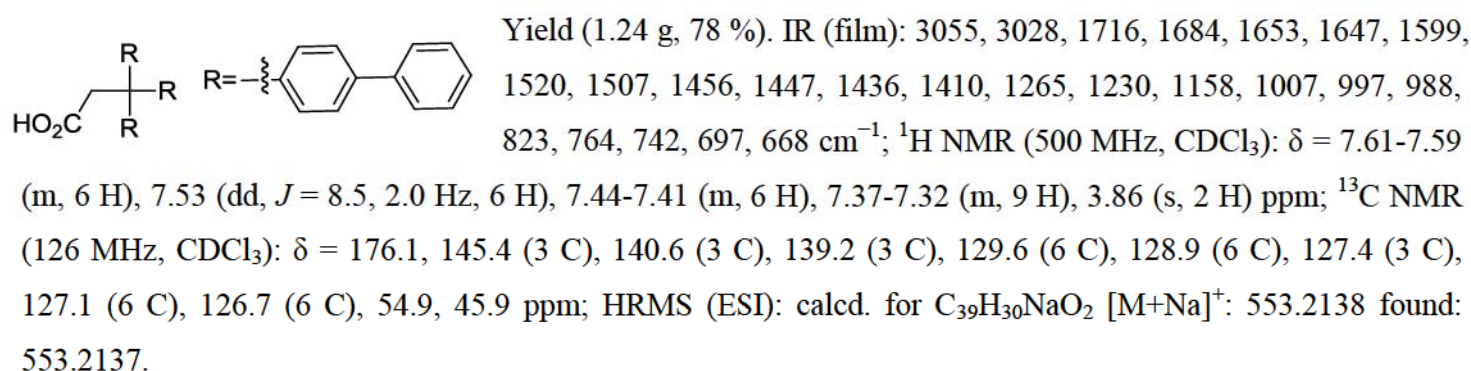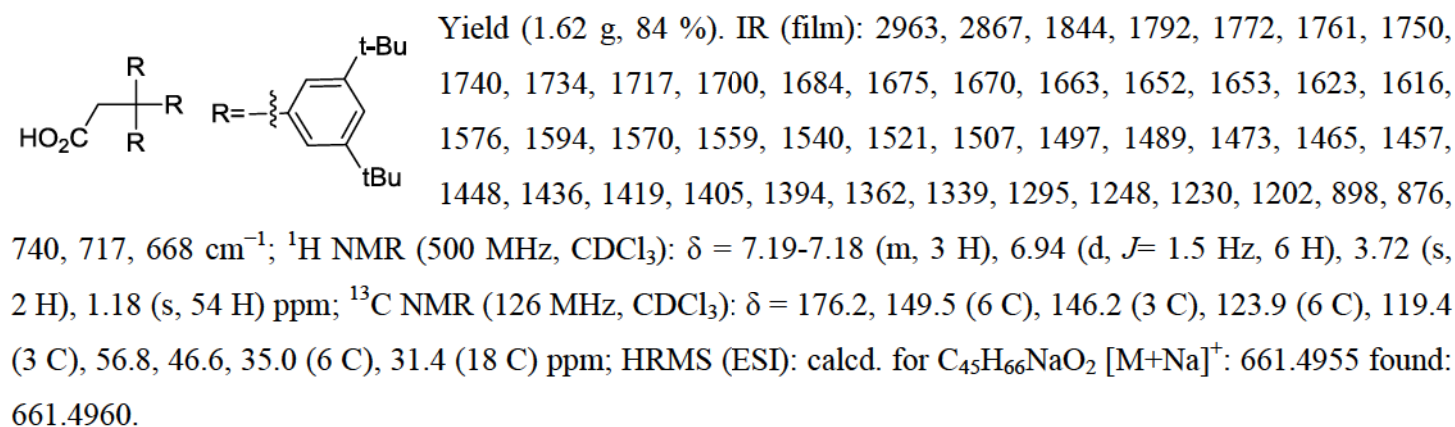

### General Procedure for Synthesis of BHA-3 and BHA-5

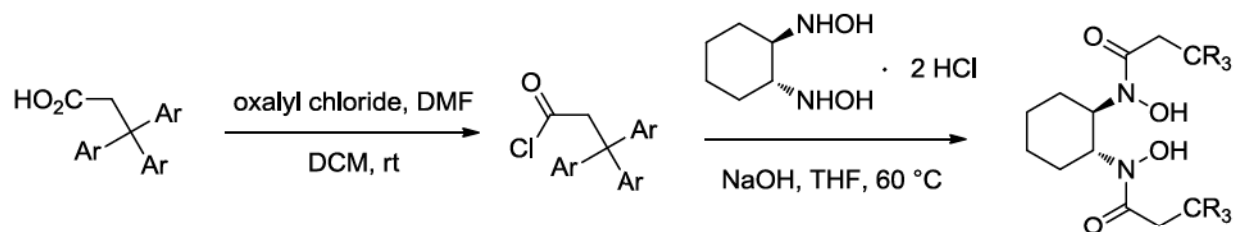

The triaryl carboxylic acid (2.5 mmol) was dissolved in DCM (25 mL), to which oxalyl chloride (0.45 mL, 5 mmol) and DMF (25  $\mu\text{L}$ ) were added sequentially at r.t.. The mixture was then stirred overnight at r.t., before the solvent was removed under reduced pressure giving the crude acid chloride, which was used without further purification.

To a stirred solution of the hydroxyl ammonium chloride<sup>[1]</sup> (1.25 mmol) in water (4 mL) was added an aqueous solution of 2 N NaOH (2.8 mL) at r. t.. After 30 s the mixture was added to a solution of the acid chloride in THF (25 mL). Then the reaction mixture was stirred at 60 °C for 30 min. After being cooled down to r.t., the reaction was quenched by adding 1 N HCl. The resulting biphasic mixture was stirred for 30 min. Then the aqueous phase was extracted with ether and the combined organic phases were washed with saturated aqueous NaHCO<sub>3</sub>, brine, dried over Na<sub>2</sub>SO<sub>4</sub>, filtered and evaporated under reduced pressure. The crude product was purified through column chromatography.

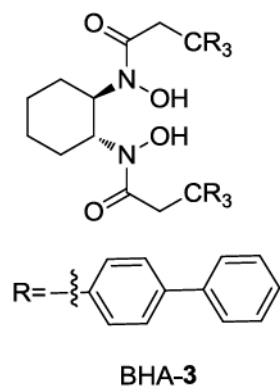

Yield (1.04 g, 71 %). IR (film): 3056, 3028, 2937, 2860, 1599, 1560, 1517, 1486, 1447, 1420, 1287, 1240, 1171, 1278, 1075, 1007, 836, 764, 742, 696, 655, 612, 577 cm<sup>-1</sup>; <sup>1</sup>H NMR (500 MHz, CDCl<sub>3</sub>): δ = 8.45 (brs, 2 H), 7.55 (d, *J* = 7.0 Hz, 12 H), 7.45 (d, *J* = 8.0 Hz, 12 H), 7.41-7.37 (m, 24 H), 7.32-7.25 (m, 6 H), 4.28 (d, *J* = 15.5 Hz, 2 H), 3.94 (d, *J* = 9.0 Hz, 2 H), 3.76 (d, *J* = 15.5 Hz, 2 H), 1.58-1.51 (m, 2 H), 1.49-1.40 (m, 2 H), 1.38-1.31 (m, 2 H), 1.07-0.98 (m, 2 H) ppm; <sup>13</sup>C NMR (126 MHz, CDCl<sub>3</sub>): δ = 173.6 (2 C), 146.1 (6 C), 140.6 (6 C), 139.0 (6 C), 129.0 (12 C), 128.9 (12 C), 127.4 (6 C), 127.1 (12 C), 126.5 (12 C), 55.8 (2 C), 55.2 (2 C), 42.5 (2 C), 27.5 (2 C), 24.5 (2 C) ppm; HRMS (ESI): calcd. for C<sub>84</sub>H<sub>70</sub>N<sub>2</sub>NaO<sub>4</sub> [M+Na]<sup>+</sup>: 1193.5228 found: 1193.5228.

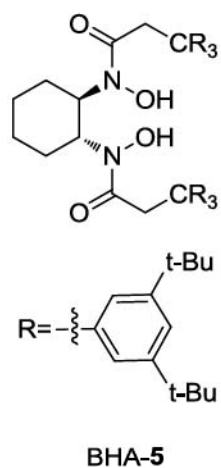

Yield (831 mg, 48 %). IR (film): 3197, 3075, 2963, 2866, 2361, 2338, 1772, 1734, 1717, 1700, 1684, 1670, 1646, 1635, 1617, 1576, 1570, 1559, 1540, 1521, 1506, 1497, 1475, 1457, 1436, 1394, 1362, 1248, 1202, 1173, 898, 875, 714, 668 cm<sup>-1</sup>; <sup>1</sup>H NMR (500 MHz, CDCl<sub>3</sub>): δ = 7.85 (brs, 2 H), 7.15-7.14 (m, 6 H), 7.03 (d, *J* = 2.0 Hz, 12 H), 4.13 (d, *J* = 15.5 Hz, 2 H), 3.86 (t, *J* = 6.0 Hz, 2 H), 3.72 (d, *J* = 15.5 Hz, 2 H), 1.58-1.56 (m, 2 H), 1.39-1.33 (m, 2 H), 1.90-1.85 (m, 2 H), 1.88 (s, 128 H), 1.04-1.00 (m, 2 H) ppm; <sup>13</sup>C NMR (126 MHz, CDCl<sub>3</sub>): δ = 174.3 (2 C), 149.0 (12 C), 147.1 (6 C), 124.2 (12 C), 119.0 (6 C), 57.6 (2 C), 55.1 (2 C), 41.9 (2 C), 35.0 (12 C), 31.7 (36 C), 27.8 (2 C), 24.5 (2 C) ppm; HRMS (ESI): calcd. for C<sub>96</sub>H<sub>142</sub>N<sub>2</sub>NaO<sub>4</sub> [M+Na]<sup>+</sup>: 1410.0862 found: 1410.0864.

## General Procedure for Synthesis of the Tertiary Alcohols 1o and 3h

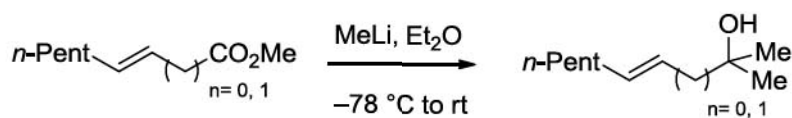

The ester (7.5 mmol) was dissolved in Et<sub>2</sub>O (10 mL), to which MeLi (16.5 mmol, 10.3 mL, 1.6 M solution in Et<sub>2</sub>O) was added drop wise at  $-78\text{ }^\circ\text{C}$ . The resulting mixture was stirred for 45 min at  $-78\text{ }^\circ\text{C}$  and 15 min at r. t.. After quenching with saturated aqueous NH<sub>4</sub>Cl solution, the contents were extracted with ether. The combined organic layers were washed with brine, dried over MgSO<sub>4</sub>, filtered and evaporated under reduced pressure. The crude product was purified through column chromatography (hexane:EtOAc= 15:1).

**1o** Yield (0.84 g, 72 %), IR (film): 3365, 2962, 2927, 2873, 2857, 1716, 1458, 1376, 1231, 1148, 971, 908, 927, 668 cm<sup>-1</sup>; <sup>1</sup>H NMR (500 MHz, CDCl<sub>3</sub>):  $\delta$  = 5.62-5.57 (m, 2 H), 2.02-1.99 (m, 2 H), 1.58 (brs, 1 H), 1.38-1.27 (m, 6 H), 1.33 (s, 6 H), 0.89 (t,  $J$ = 7.0 Hz, 3 H) ppm; <sup>13</sup>C NMR (126 MHz, CDCl<sub>3</sub>):  $\delta$  = 137.9, 127.4, 70.7, 32.2, 31.5, 29.9 (2 C), 29.1, 22.6, 14.2 ppm; HRMS (ESI): calcd. for C<sub>10</sub>H<sub>20</sub>NaO [M+Na]<sup>+</sup>: 179.1406 found: 179.1404.

**3h** Yield (0.55 g, 43 %). IR (film): 3365, 2963, 2965, 2872, 2856, 1734, 1717, 1700, 1684, 1653, 1646, 1636, 1576, 1559, 1497, 1457, 1437, 1419, 1395, 1376, 1363, 1213, 1150, 1103, 972, 906, 668 cm<sup>-1</sup>; <sup>1</sup>H NMR (500 MHz, CDCl<sub>3</sub>):  $\delta$  = 5.55-5.45 (m, 2 H), 2.15 (d,  $J$ = 7.0 Hz, 2 H), 2.03 (q,  $J$ = 7.0 Hz, 2 H), 1.50 (brs, 1 H), 1.40-1.29 (m, 6 H), 1.20 (s, 6 H), 0.89 (t,  $J$ = 7.0 Hz, 3 H) ppm; <sup>13</sup>C NMR (126 MHz, CDCl<sub>3</sub>):  $\delta$  = 135.5, 125.3, 70.6, 47.1, 32.8, 31.6, 29.3, 29.2 (2 C), 22.7, 14.2 ppm; HRMS (ESI): calcd. for C<sub>11</sub>H<sub>22</sub>NaO [M+Na]<sup>+</sup>: 193.1563 found: 193.1562.

## Procedure for Synthesis of the Allylic Alcohol 1t

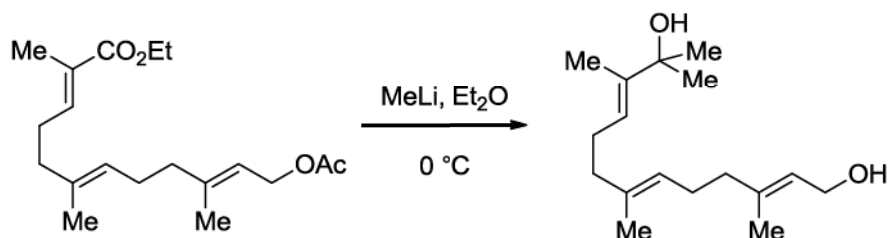

To a solution of the ester<sup>6</sup> (2.5 mmol) in Et<sub>2</sub>O (25 mL) was added MeLi (11.25 mmol, 7.0 mL, 1.6 M solution in Et<sub>2</sub>O) at 0 °C. Then the resulting mixture was stirred for 1 h at 0 °C, before the reaction was quenched with sat.

aq.  $\text{NH}_4\text{Cl}$ . The aqueous phase was extracted with ether. The combined organic layers were washed with brine, dried over  $\text{MgSO}_4$ , filtered and evaporated under reduced pressure. The crude product was purified through column chromatography (hexane:EtOAc= 3:1 to 2:1).

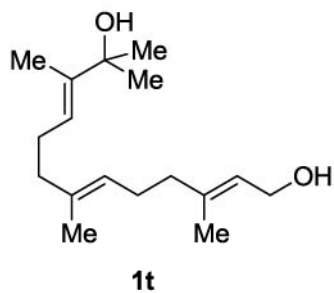

Yield (0.50 g, 75 %), IR (film): 3341, 2975, 2924, 1468, 1462, 1443, 1433, 1413, 1380, 1171, 1003, 986, 937, 854  $\text{cm}^{-1}$ ;  $^1\text{H}$  NMR (500 MHz,  $\text{CDCl}_3$ ):  $\delta$  = 5.48-5.45 (m, 1 H), 5.43-5.40 (m, 1 H), 5.13-5.10 (m, 1 H), 2.13-2.01 (m, 8 H), 1.68 (s, 3 H), 1.66 (s, 3 H), 1.61 (s, 6 H), 1.31 (s, 3 H) ppm;  $^{13}\text{C}$  NMR (126 MHz,  $\text{CDCl}_3$ ):  $\delta$  = 141.3, 139.5, 135.2, 124.2, 123.7, 121.9, 73.6, 59.5, 39.6, 39.5, 29.0 (2 C), 26.4, 26.3, 16.4, 16.1, 12.9 ppm; HRMS (ESI): calcd. for  $\text{C}_{17}\text{H}_{30}\text{NaO}_2$   $[\text{M}+\text{Na}]^+$ :

289.2138 found: 289.2143.

### Procedure for Synthesis of the Allylic Alcohol 1u

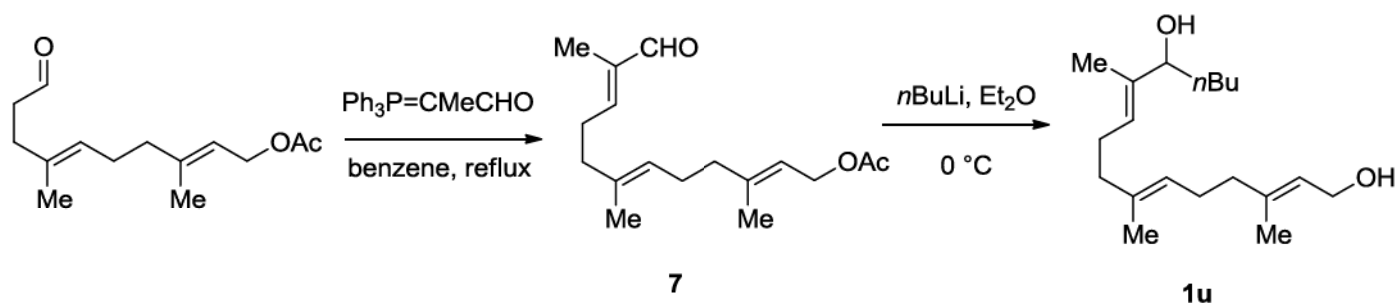

The suspension of the aldehyde<sup>6</sup> (5 mmol) and  $\text{Ph}_3\text{P}=\text{CMeCHO}$  (6.25 mmol) in benzene (20 mL) was refluxed for 24 h. Then the solvent was removed in vacuum and the crude product was purified through column chromatography giving the product as a colorless oil (hexane:Et<sub>2</sub>O=5:1).

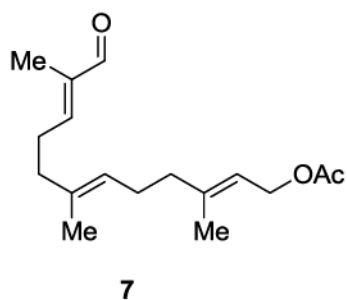

Yield (1.1 g, 79 %),  $^1\text{H}$  NMR (500 MHz,  $\text{CDCl}_3$ ):  $\delta$  = 9.39 (s, 1 H), 6.48-6.45 (m, 1 H), 5.36-5.32 (m, 1 H), 5.16-5.13 (m, 1 H), 4.59 (d,  $J$ = 7.0 Hz, 2 H), 2.45 (dd,  $J$ = 14.5, 7.5 Hz, 2 H), 2.19-2.07 (m, 4 H), 2.08-2.03 (m, 2 H), 2.06 (s, 3 H), 1.75 (s, 3 H), 1.74 (s, 3 H), 1.71 (s, 3 H) ppm;  $^{13}\text{C}$  NMR (126 MHz,  $\text{CDCl}_3$ ):  $\delta$  = 195.3, 171.2, 154.4, 142.0, 139.6, 134.0, 125.1, 118.7, 61.5, 39.5, 38.1, 27.5, 26.3, 21.2, 16.6, 16.1, 9.4 ppm.

To a solution of the aldehyde **7** (4.5 mmol) in Et<sub>2</sub>O (45 mL) was added *n*BuLi (15.75 mmol, 6.3 mL, 2.5 M solution in hexane) at 0 °C. Then the resulting mixture was stirred for 1 h at 0 °C, before the reaction was quenched with sat. aq. NH<sub>4</sub>Cl. The aqueous phase was extracted with ether. The combined organic layers were washed with brine, dried over MgSO<sub>4</sub>, filtered and evaporated under reduced pressure. The crude product was purified through column chromatography (hexane:EtOAc=3:1).

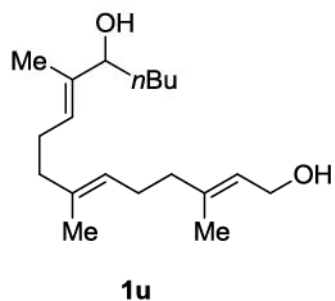

Yield (0.95 g, 72 %), IR (film): 3334, 2955, 2929, 2870, 2859, 1464, 1457, 1448, 1437, 1419, 1380, 1004, 668 cm<sup>-1</sup>; <sup>1</sup>H NMR (500 MHz, CDCl<sub>3</sub>): δ = 5.42-5.41 (m, 1 H), 5.35-5.33 (m, 1 H), 5.12-5.10 (m, 1 H), 4.15 (d, *J*= 6.5 Hz, 2 H), 3.96 (t, *J*= 6.5 Hz, 1 H), 2.13-2.10 (m, 4 H), 2.06-2.00 (m, 4 H), 1.68 (s, 3 H), 1.60 (s, 3 H), 1.59 (s, 3 H), 1.54-1.49 (m, 2H), 1.32-1.28 (m, 4 H), 1.22-1.15 (m, 1H), 0.90 (t, *J*= 7.0 Hz, 3 H) ppm; <sup>13</sup>C NMR (126 MHz, CDCl<sub>3</sub>): δ = 139.7, 137.5, 135.1, 126.3, 124.3, 123.7, 78.1, 59.6, 39.6, 39.4, 34.7, 28.2, 26.3, 26.1, 22.8, 16.4, 16.1, 14.2, 11.4 ppm; HRMS (ESI): calcd. for C<sub>19</sub>H<sub>34</sub>NaO<sub>2</sub> [M+Na]<sup>+</sup>: 317.2451 found: 317.2458.

### Procedure for Synthesis of the Cyclic Homoallylic Alcohol **3g**

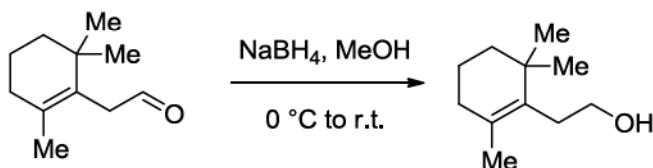

To a solution of the aldehyde (7.5 mmol) in MeOH (7.5 mL) was added NaBH<sub>4</sub> (22.5 mmol) portion wise at 0 °C. The resulting mixture was stirred for 30 min at 0 °C and 30 min at r.t.. After quenching with water, the contents were extracted with ether. The combined organic layers were washed with brine, dried over MgSO<sub>4</sub>, filtered and evaporated under reduced pressure. The crude product was purified through column chromatography (hexane:EtOAc= 10:1).

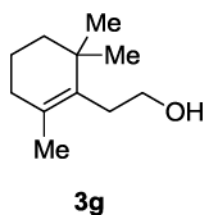

Yield (1.07 g, 85 %), IR (film): 3393, 2966, 2926, 2905, 2864, 2829, 1473, 1456, 1374, 1359, 1038, 1018, 997, 614 cm<sup>-1</sup>; <sup>1</sup>H NMR (500 MHz, CDCl<sub>3</sub>): δ = 3.62 (t, *J*= 8.5 Hz, 2 H), 2.35 (t, *J*= 8.0 Hz, 2 H), 1.92 (dd, *J*= 12.5, 6.0 Hz, 2 H), 1.64 (s, 3 H), 1.58-1.55 (m, 2 H), 1.42 (dd, *J*= 6.0, 2.5 Hz, 2 H) ppm; <sup>13</sup>C NMR (126 MHz, CDCl<sub>3</sub>): δ = 132.9, 129.8, 62.7, 39.9,



34.9, 32.9, 32.4, 28.7 (2 C), 20.3, 19.6 ppm; HRMS (ESI): calcd. for  $C_{11}H_{20}O$   $[M+H]^+$ : 169.1587 found: 169.1584.

## General Procedure for the Epoxidation of Allylic and Homoallylic Alcohols

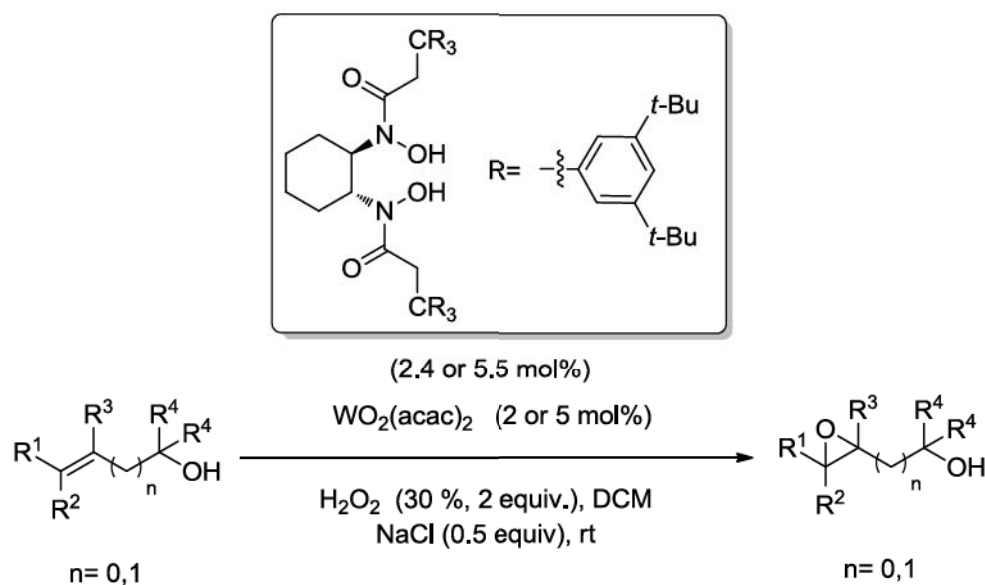

To a stirred solution of BHA-5 (0.012 or 0.0275 mmol, 2.4 or 5.4 mmol%),  $\text{WO}_2(\text{acac})_2$  (0.01 or 0.025 mmol, 2 or 5 mmol%) and NaCl (14.6 mg, 0.25 mmol) in dichloromethane (5.0 mL) were added 30 % aqueous  $\text{H}_2\text{O}_2$  (1.0 mmol, 102  $\mu\text{L}$ ) and the allylic or homoallylic alcohols (0.50 mmol). After stirring for the time given in Chart 1, Chart 2 and Chart 3 the solvent was removed in vacuum and the residue was purified by flash chromatography on silica gel (hexane:ether or hexane:EtOAc) affording the corresponding epoxides.

For the reaction on a scale of 10 mmol **1a** the reaction mixture was quenched by aq. sat.  $\text{Na}_2\text{SO}_3$ , before contents were extracted with dichloromethane. The combined organic layers were washed with brine, dried over  $\text{MgSO}_4$ , filtered and evaporated under reduced pressure. The crude product was purified through column chromatography (hexane:EtOAc= 10:1 to 2:1) yielding the BHA-5 and the epoxide **2a**.

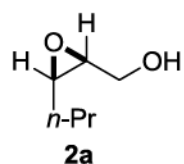

*((2S,3R)-3-Propyloxiran-2-yl)methanol (2a)* was isolated by flash chromatography on silica gel (hexane:ether= 1:1) as a colorless oil (53 mg, 92 %).  $[\alpha]_D^{20} = -6.1$  (c = 1.2,  $\text{CHCl}_3$ ), Lit.  $[\alpha]_D^{26} = -5.4$  (c = 1.23,  $\text{CHCl}_3$ ) for (*S, R*)-isomer;<sup>8</sup>  $^1\text{H NMR}$  (500 MHz,  $\text{CDCl}_3$ ):  $\delta = 3.85$  (dd,  $J = 17.5, 4.0$  Hz, 1 H), 3.66 (dd,  $J = 12.0, 7.5$  Hz, 1 H), 3.18-3.15 (m, 1 H), 3.05-3.04 (m, 1 H), 2.90 (brs, 1 H), 1.57-1.46 (m, 4 H), 0.98 (t,  $J = 7.0$  Hz, 3 H) ppm;  $^{13}\text{C NMR}$  (126 MHz,  $\text{CDCl}_3$ ):  $\delta = 61.1, 57.3, 56.9, 30.1, 20.1, 14.0$  ppm.

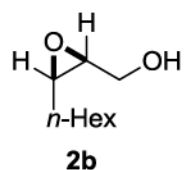

*((2S,3R)-3-Hexyloxiran-2-yl)methanol (2b)* was isolated by flash chromatography on silica gel (hexane:EtOAc= 3:1) as a colorless oil (74 mg, 94 %).  $^1\text{H NMR}$  (500 MHz,  $\text{CDCl}_3$ ):  $\delta = 3.85-$

3.82 (m, 1 H), 3.68 (d,  $J = 7.0$  Hz, 1 H), 3.18-3.15 (m, 1 H), 3.05-3.02 (m, 1 H), 2.08 (brs, 1 H), 1.58-1.28 (m, 10 H), 0.89 (t,  $J = 7.0$  Hz, 3 H) ppm;  $^{13}\text{C}$  NMR (126 MHz,  $\text{CDCl}_3$ ):  $\delta = 61.1, 57.5, 57.0, 31.8, 29.2, 28.1, 26.7, 22.7, 14.2$  ppm.

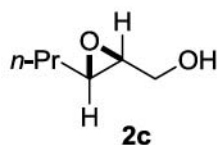

*((2S,3S)*-3-Propyloxiran-2-yl)methanol (**2c**) was isolated by flash chromatography on silica gel (hexane:ether= 1:1) as a colorless oil (52 mg, 90 %).  $[\alpha]_{\text{D}}^{20} = 46.1$  ( $c = 1.0, \text{CHCl}_3$ ), Lit.  $[\alpha]_{\text{D}}^{20} = 44.6$  ( $c = 1.0, \text{CHCl}_3$ ) for (*S,S*)-isomer;<sup>9</sup>  $^1\text{H}$  NMR (500 MHz,  $\text{CDCl}_3$ ):  $\delta = 3.92$  (dd,  $J = 12.5, 2.0$  Hz, 1 H), 3.63 (d,  $J = 12.0$  Hz, 1 H), 2.98-2.92 (m, 2 H), 1.74 (brs, 1 H), 1.59-1.45 (m, 4 H), 0.97 (t,  $J = 7.5$  Hz, 3 H) ppm;  $^{13}\text{C}$  NMR (126 MHz,  $\text{CDCl}_3$ ):  $\delta = 61.8, 58.5, 55.9, 33.7, 19.4, 14.0$  ppm.

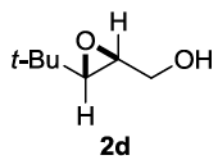

*((2S,3S)*-3-(*tert*-Butyl)oxiran-2-yl)methanol (**2d**) was isolated by flash chromatography on silica gel (hexane:EtOAc= 3:1) as a colorless oil (57 mg, 88 %).  $^1\text{H}$  NMR (500 MHz,  $\text{CDCl}_3$ ):  $\delta = 3.93$ -3.89 (m, 1 H), 3.62-3.58 (m, 1 H), 3.05-3.04 (m, 1 H), 2.76 (brs, 1 H), 2.23-2.22 (m, 4 H), 0.94 (s, 9 H) ppm;  $^{13}\text{C}$  NMR (126 MHz,  $\text{CDCl}_3$ ):  $\delta = 63.8, 62.3, 55.6, 30.6, 25.9$  (3 C) ppm.

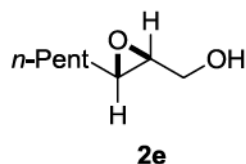

*((2S,3S)*-3-Pentyloxiran-2-yl)methanol (**2e**) was isolated by flash chromatography on silica gel (hexane:EtOAc= 3:1) as a colorless oil (65 mg, 90 %).  $^1\text{H}$  NMR (500 MHz,  $\text{CDCl}_3$ ):  $\delta = 3.93$ -3.91 (m, 1 H), 3.65-3.63 (m, 1 H), 2.98-2.91 (m, 2 H), 1.80-1.79 (m, 1 H), 1.56 (dd,  $J = 7.5, 6.0$  Hz, 2 H), 1.48-1.43 (m, 4 H), 0.89 (t,  $J = 7.0$  Hz, 3 H) ppm;  $^{13}\text{C}$  NMR (126 MHz,  $\text{CDCl}_3$ ):  $\delta = 61.9, 58.6, 56.1, 31.7$  (2 C), 25.8, 22.7, 14.1 ppm.

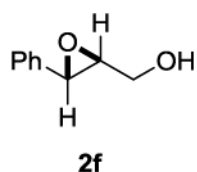

*((2S,3S)*-3-Phenyloxiran-2-yl)methanol (**2f**) was isolated by flash chromatography on silica gel (hexane:EtOAc= 4:1) as a colorless syrup (65 mg, 87 %).  $[\alpha]_{\text{D}}^{20} = -46.1$  ( $c = 1.2, \text{CHCl}_3$ ), Lit.  $[\alpha]_{\text{D}}^{20} = -46.4$  ( $c = 1.32, \text{CHCl}_3$ ) for (*S,S*)-isomer;<sup>9</sup>  $^1\text{H}$  NMR (500 MHz,  $\text{CDCl}_3$ ):  $\delta = 7.37$ -7.27 (m, 5 H), 4.06-4.03 (m, 1 H), 3.93 (d,  $J = 2.0$  Hz, 1 H), 3.82-3.78 (m, 1 H), 3.24-3.22 (m, 1 H), 2.27 (dd,  $J = 7.0, 6.0$  Hz, 1 H) ppm;  $^{13}\text{C}$  NMR (126 MHz,  $\text{CDCl}_3$ ):  $\delta = 136.8, 128.7$  (2 C), 128.5, 125.9 (2 C), 62.6, 61.4, 55.7 ppm.

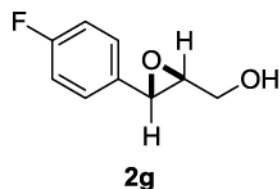

*((2S,3S)*-3-(4-Fluorophenyl)oxiran-2-yl)methanol (**2g**) was isolated by flash chromatography on silica gel (hexane:EtOAc= 6:1) as a colorless syrup (61 mg, 72 %).  $^1\text{H}$  NMR (500 MHz,  $\text{CDCl}_3$ ):  $\delta = 7.26$ -7.23 (m, 2 H), 7.06-7.02 (m, 2 H), 4.06-4.02 (m,

1 H), 3.92 (d,  $J = 2.0$  Hz, 1 H), 3.82-3.77 (m, 1H), 3.20-3.19 (m, 1 H), 2.24-2.18 (m, 1 H) ppm;  $^{13}\text{C}$  NMR (126 MHz,  $\text{CDCl}_3$ ):  $\delta = 162.9$  (d,  $J = 244.4$  Hz), 132.5 (d,  $J = 2.5$  Hz), 127.5 (d,  $J = 7.6$  Hz, 2 C), 115.6 (d,  $J = 22.7$  Hz, 2 C), 62.6, 61.3, 55.2 ppm.

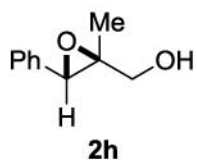

*((2S,3S)-2-Methyl-3-phenyloxiran-2-yl)methanol (2h)* was isolated by flash chromatography on silica gel (hexane:EtOAc= 3:1) as a colorless syrup (71 mg, 87 %).  $[\alpha]_{\text{D}}^{20} = -14.1$  ( $c = 2.0$ ,  $\text{CHCl}_3$ ), Lit.  $[\alpha]_{\text{D}}^{25} = -16.9$  ( $c = 2.0$ ,  $\text{CHCl}_3$ ) for (*S,S*)-isomer;<sup>9</sup>  $^1\text{H}$  NMR (500 MHz,  $\text{CDCl}_3$ ):  $\delta = 7.38$ -7.35 (m, 3 H), 7.31-7.26 (m, 2 H), 4.23 (s, 1 H), 3.86 (d,  $J = 12.5$  Hz, 1 H), 3.76 (d,  $J = 12.5$  Hz, 1 H), 1.10 (s, 3 H) ppm;  $^{13}\text{C}$  NMR (126 MHz,  $\text{CDCl}_3$ ):  $\delta = 135.7$ , 128.1 (2 C), 127.7, 126.5 (2 C), 65.1, 63.8, 60.3, 13.6 ppm.

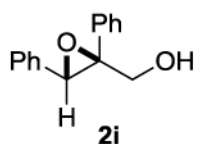

*((2S,3S)-2,3-Diphenyloxiran-2-yl)methanol (2i)* was isolated by flash chromatography on silica gel (hexane:EtOAc= 3:1) as a colorless solid (89 mg, 79 %).  $[\alpha]_{\text{D}}^{20} = -58.5$  ( $c = 0.75$ , DCM), Lit.  $[\alpha]_{\text{D}} = -65.2$  ( $c = 1.0$ , DCM) for (*S,S*)-isomer;<sup>10</sup>  $^1\text{H}$  NMR (500 MHz,  $\text{CDCl}_3$ ):  $\delta = 7.20$ -7.19 (m, 5 H), 7.11-7.10 (m, 3 H), 7.04-7.02 (m, 2 H), 5.52 (s, 1 H), 4.04-4.03 (m, 2 H), 2.28 (t,  $J = 6.5$  Hz, 1 H) ppm;  $^{13}\text{C}$  NMR (126 MHz,  $\text{CDCl}_3$ ):  $\delta = 134.9$ , 134.5, 128.2 (2 C), 128.0, 127.9 (2 C), 127.8 (2 C), 127.7, 126.7 (2 C), 69.3, 65.1, 60.9 ppm.

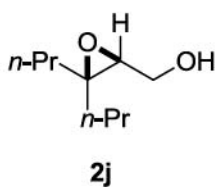

*(S)-(3,3-Dipropyloxiran-2-yl)methanol (2j)* was isolated by flash chromatography on silica gel (hexane:EtOAc= 3:1) as a colorless oil (67 mg, 86 %). IR (film): 3412, 2961, 2874, 1718, 1684, 1576, 1466, 1478, 1431, 1380, 1287, 1257, 1133, 1034, 977, 944, 901, 845, 810, 752, 705, 675, 648  $\text{cm}^{-1}$ ;  $^1\text{H}$  NMR (500 MHz,  $\text{CDCl}_3$ ):  $\delta = 3.88$ -3.84 (m, 1 H), 3.70-3.65 (m, 1 H), 2.97 (dd,  $J = 7.0$ , 4.0 Hz, 1 H), 2.00 (s, 1 H), 1.61-1.55 (m, 2 H), 1.50-1.38 (m, 6 H), 0.95-0.91 (m, 6 H);  $^{13}\text{C}$  NMR (126 MHz,  $\text{CDCl}_3$ ):  $\delta = 64.2$ , 63.1, 61.4, 37.3, 32.6, 18.8, 18.1, 14.5, 14.3 ppm; HRMS (ESI): calcd. for  $\text{C}_9\text{H}_{18}\text{NaO}_2$   $[\text{M}+\text{Na}]^+$ : 181.1199 found: 181.1208.

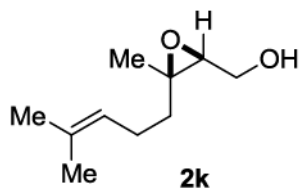

*((2S,3R)-3-Methyl-3-(4-methylpent-3-en-1-yl)oxiran-2-yl)methanol (2k)* was isolated by flash chromatography on silica gel (hexane:EtOAc= 3:1) as a colorless oil (82 mg, 96 %).  $[\alpha]_{\text{D}}^{20} = -19.7$  ( $c = 1.3$ ,  $\text{CHCl}_3$ ), Lit.  $[\alpha]_{\text{D}}^{23} = -18.8$  ( $c = 1.52$ ,  $\text{CHCl}_3$ ) for (*S,R*)-isomer;<sup>8</sup>  $^1\text{H}$  NMR (500 MHz,  $\text{CDCl}_3$ ):  $\delta = 5.11$ -5.09 (m, 1 H), 3.82-3.80 (m, 1 H), 3.67 (dd,  $J = 12.0$ , 5.0 Hz, 1 H), 2.98-2.96 (m, 1 H), 2.15-2.06 (m, 2 H), 1.70 (s, 3 H), 1.68-1.65 (m, 2 H), 1.62

(s, 3 H), 1.52-1.45 (m, 1 H), 1.35 (s, 3 H) ppm;  $^{13}\text{C}$  NMR (126 MHz,  $\text{CDCl}_3$ ):  $\delta = 132.7, 123.5, 64.3, 61.6, 61.4, 33.3, 25.8, 24.3, 22.3, 17.8$  ppm.

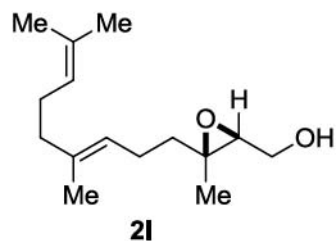

*((2S,3S)-3-((E)-4,8-Dimethylnona-3,7-dien-1-yl)-3-methyloxiran-2-yl)methanol (21)*

was isolated by flash chromatography on silica gel (hexane:EtOAc= 4:1) as a colorless oil (105 mg, 88 %).  $[\alpha]_D^{20} = -6.3$  (c = 1.0,  $\text{CHCl}_3$ ), Lit.  $[\alpha]_D^{24} = -5.7$  (c = 1.083,  $\text{CHCl}_3$ ) for (*S,S*)-isomer; $^8$   $^1\text{H}$  NMR (500 MHz,  $\text{CDCl}_3$ ):  $\delta = 5.11-5.07$  (m, 2 H), 3.83 (dd,  $J = 12.0, 4.5$  Hz, 1 H), 3.69 (dd,  $J = 12.0, 6.5$  Hz, 1 H), 2.98 (dd,  $J = 6.5, 4.5$  Hz, 1 H), 2.11-2.04 (m, 4 H), 1.98 (t,  $J = 7.0$  Hz, 2 H), 1.73-1.67 (m, 3 H), 1.68 (s, 3 H), 1.61 (s, 3 H), 1.60 (s, 3 H), 1.51-1.46 (m, 1 H), 1.31 (s, 3 H) ppm;  $^{13}\text{C}$  NMR (126 MHz,  $\text{CDCl}_3$ ):  $\delta = 136.0, 131.6, 124.4, 123.4, 63.0, 61.6, 61.3, 39.8, 38.7, 26.8, 25.8, 23.8, 17.8, 16.9, 16.1$  ppm.

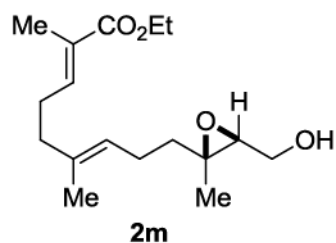

*(2E,6E)-Ethyl 9-((2S,3S)-3-(hydroxymethyl)-2-methyloxiran-2-yl)-2,6-dimethylnona-2,6-dienoate (2m)*

was isolated by flash chromatography on silica gel (hexane:EtOAc= 2:1) as a colorless oil (124 mg, 84 %).  $^1\text{H}$  NMR (500 MHz,  $\text{CDCl}_3$ ):  $\delta = 6.74-6.71$  (m, 1 H), 5.15-5.13 (m, 1 H), 4.18 (q,  $J = 7.0$  Hz, 2 H), 3.86-3.80 (m, 1 H), 3.70-3.64 (m, 1 H), 2.97 (dd,  $J = 7.0, 4.5$  Hz, 1 H), 2.28-2.25 (m, 2 H), 2.13-2.08 (m, 5 H), 1.83 (s, 3 H), 1.74-1.67 (m, 1 H), 1.62 (s, 3 H), 1.51-1.47 (m, 1 H), 1.30 (s, 3 H), 1.29 (t,  $J = 7.0$  Hz, 3 H) ppm;  $^{13}\text{C}$  NMR (126 MHz,  $\text{CDCl}_3$ ):  $\delta = 168.5, 142.0, 134.8, 128.0, 124.3, 63.0, 61.5, 61.1, 60.6, 38.5, 38.3, 27.2, 23.7, 16.9, 16.0, 14.4, 12.5$  ppm.

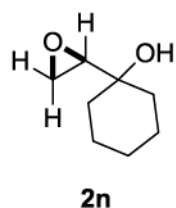

*(R)-1-(Oxiran-2-yl)cyclohexanol (2n)*

was isolated by flash chromatography on silica gel (hexane:EtOAc= 3:1) as a colorless oil (61 mg, 86 %).  $^1\text{H}$  NMR (500 MHz,  $\text{CDCl}_3$ ):  $\delta = 2.96$  (dd,  $J = 3.5, 2.0$  Hz, 1 H), 2.84 (dd,  $J = 5.0, 2.5$  Hz, 1 H), 2.71 (dd,  $J = 15.0, 4.0$  Hz, 1 H), 1.72-1.51 (m, 9 H), 1.56-1.51 (m, 1 H), 1.32-1.26 (m, 1 H) ppm;  $^{13}\text{C}$  NMR (126 MHz,  $\text{CDCl}_3$ ):  $\delta = 68.2, 58.2, 43.7, 36.5, 33.7, 25.9, 21.5$  (2 C) ppm.

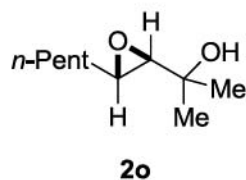

*2-((2R,3S)-3-Pentyloxiran-2-yl)propan-2-ol (2o)*

was isolated by flash chromatography on silica gel (hexane:EtOAc= 4:1) as a colorless oil (70 mg, 81 %). IR (film): 3417, 2957, 2926, 2855, 1734, 1717, 1700, 1684, 1652, 1636, 1559, 1540, 1521, 1507, 1472, 1464, 1457, 1436, 1419, 1180, 908, 688  $\text{cm}^{-1}$ ;  $^1\text{H}$  NMR (500 MHz,  $\text{CDCl}_3$ ):  $\delta = 3.00-2.99$  (m, 1

H), 2.70-2.69 (m, 1 H), 1.77 (s, 1 H), 1.60-1.25 (m, 8 H), 1.32 (s, 3 H), 1.23 (s, 3 H), 0.91 (t,  $J = 7.0$  Hz) ppm;  $^{13}\text{C}$  NMR (126 MHz,  $\text{CDCl}_3$ ):  $\delta = 67.9, 65.1, 55.9, 31.7$  (2 C), 28.0, 25.9, 25.1, 22.7, 14.1 ppm; HRMS (ESI): calcd. for  $\text{C}_{10}\text{H}_{21}\text{O}_2$   $[\text{M}+\text{H}]^+$ : 173.1536 found: 173.1537.

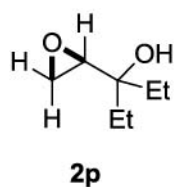

*(R)*-3-(Oxiran-2-yl)pentan-3-ol (**2p**) was isolated by flash chromatography on silica gel (hexane:EtOAc= 8:1) as a colorless oil (51 mg, 78 %).  $^1\text{H}$  NMR (500 MHz,  $\text{CDCl}_3$ ):  $\delta = 2.95$  (dd,  $J = 4.0, 3.0$  Hz, 1 H), 2.81 (dd,  $J = 5.5, 3.0$  Hz, 1 H), 2.72 (dd,  $J = 5.0, 4.0$  Hz, 2 H), 1.68-1.53 (m, 5 H), 0.98-0.93 (m, 6 H) ppm;  $^{13}\text{C}$  NMR (126 MHz,  $\text{CDCl}_3$ ):  $\delta = 71.0, 56.5, 43.5, 32.0,$

28.9, 7.8, 7.7 ppm.

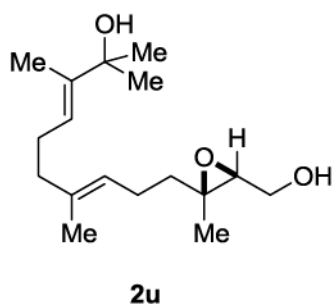

*(3E,7E)*-10-((*2S,3S*)-3-(Hydroxymethyl)-2-methyloxiran-2-yl)-2,3,7-trimethyldeca-3,7-dien-2-ol (**2u**) was isolated by flash chromatography on silica gel (hexane:EtOAc= 2:1) as a colorless oil (120 mg, 85 %). IR (film): 3396, 2973, 2926, 1457, 1383, 1035, 957, 859, 668  $\text{cm}^{-1}$ ;  $^1\text{H}$  NMR (500 MHz,  $\text{CDCl}_3$ ):  $\delta = 5.48$ -5.45 (m, 1 H), 5.12-5.10 (m, 1 H), 3.82-3.81 (m, 1 H), 3.65-3.64 (m, 1 H), 2.97 (dd,  $J = 7.0, 4.5$  Hz, 1 H), 2.11-2.04 (m, 6 H), 1.70-1.50 (m, 2 H), 1.63 (s, 3 H), 1.61 (s, 3

H), 1.31 (s, 3 H), 1.29 (s, 3 H) ppm;  $^{13}\text{C}$  NMR (126 MHz,  $\text{CDCl}_3$ ):  $\delta = 141.4, 135.4, 123.8, 121.7, 73.7, 63.0, 61.5, 61.3, 39.4, 38.4, 29.0$  (2 C), 26.2, 23.7, 16.8, 16.0, 13.0 ppm; HRMS (ESI): calcd. for  $\text{C}_{17}\text{H}_{30}\text{NaO}_3$   $[\text{M}+\text{Na}]^+$ : 305.2087 found: 305.2091.

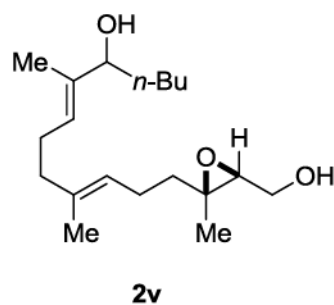

*(6E,10E)*-13-((*2S,3S*)-3-(Hydroxymethyl)-2-methyloxiran-2-yl)-6,10-dimethyltrideca-6,10-dien-5-ol (**2v**) was isolated by flash chromatography on silica gel (hexane:EtOAc= 2:1) as a colorless oil (115 mg, 74 %). IR (film): 3393, 2955, 2955, 2925, 2855, 1464, 1457, 1437, 1419, 1383, 1034  $\text{cm}^{-1}$ ;  $^1\text{H}$  NMR (500 MHz,  $\text{CDCl}_3$ ):  $\delta = 5.35$ -5.30 (m, 1 H), 5.10-5.05 (m, 1 H), 3.97-3.96 (m, 1 H), 3.82 (dd,  $J = 4.0, 2.0$  Hz, 1 H), 3.68 (dd,  $J = 7.0, 2.0$  Hz, 1 H), 2.98 (dd,  $J = 4.0, 2.0$  Hz, 1 H),

2.14-2.00 (m, 6 H), 1.68-1.50 (m, 2 H), 1.61 (s, 3 H), 1.59 (s, 3 H), 1.35-1.15 (6 H), 1.31 (s, 3 H), 0.90 (t,  $J = 7.0$  Hz, 3 H) ppm;  $^{13}\text{C}$  NMR (126 MHz,  $\text{CDCl}_3$ , mixture of two diastereomers):  $\delta = 137.6, 137.5, 135.3$  (2 peaks), 126.1 (2 peaks), 123.9, 78.1, 78.0, 62.9, 61.6, 61.3 (2 peaks), 39.4, 38.5 (2 peaks), 34.7 (2 peaks), 29.9, 28.2, 25.9 (2 peaks), 23.7 (2 peaks), 22.8, 16.8 (2 peaks), 16.1, 16.0, 14.2, 11.5 (2 peaks) ppm; HRMS (ESI): calcd. for  $\text{C}_{19}\text{H}_{34}\text{NaO}_3$   $[\text{M}+\text{Na}]^+$ : 333.2400 found: 333.2406.

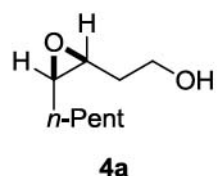

2-((2*S*,3*R*)-3-*Pentylloxiran-2-yl*)ethanol (**4a**) was isolated by flash chromatography on silica gel (hexane:EtOAc= 3:1) as a colorless oil (70 mg, 89 %). <sup>1</sup>H NMR (500 MHz, CDCl<sub>3</sub>): δ = 3.90-3.80 (m, 2 H), 3.10 (dd, *J* = 8.0, 4.0 Hz, 1 H), 2.96 (dd, *J* = 6.5, 2.0 Hz, 1 H), 1.90-1.87 (m, 2 H), 1.72-1.69 (m, 2 H), 1.55-1.33 (m, 7 H), 0.90 (t, *J* = 7.0 Hz, 3 H) ppm; <sup>13</sup>C NMR (126 MHz, CDCl<sub>3</sub>): δ = 60.9, 56.9, 55.2, 31.8, 30.7, 28.0, 26.3, 22.7, 14.1 ppm.

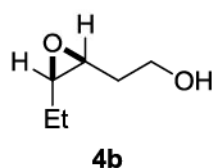

2-((2*S*,3*R*)-3-*Ethylloxiran-2-yl*)ethanol (**4b**) was isolated by flash chromatography on silica gel (hexane:ether= 1:1) as a colorless oil (49 mg, 85 %). <sup>1</sup>H NMR (500 MHz, CDCl<sub>3</sub>): δ = 3.88-3.83 (m, 2 H), 3.13-3.10 (m, 1 H), 2.94-2.91 (m, 1 H), 2.20 (brs, 1 H), 1.88-1.86 (m, 2 H), 1.72-1.69 (m, 1 H), 1.61-1.52 (m, 2 H), 1.05 (t, *J* = 7.0 Hz, 3 H) ppm; <sup>13</sup>C NMR (126 MHz, CDCl<sub>3</sub>): δ = 60.7, 58.1, 55.3, 30.6, 21.3, 10.5 ppm.

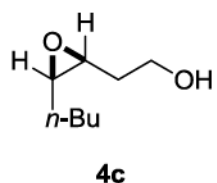

2-((2*S*,3*R*)-3-*Butylloxiran-2-yl*)ethanol (**4c**) was isolated by flash chromatography on silica gel (hexane:EtOAc= 3:1) as a colorless oil (66 mg, 92 %). [ $\alpha$ ]<sub>D</sub><sup>20</sup> = -19.5 (c = 0.75, CHCl<sub>3</sub>), Lit. [ $\alpha$ ]<sub>D</sub><sup>25</sup> = -19.7 (c = 0.74, CHCl<sub>3</sub>) for (*S*, *R*)-isomer;<sup>11</sup> <sup>1</sup>H NMR (500 MHz, CDCl<sub>3</sub>): δ = 3.87-3.85 (m, 2 H), 3.12-3.09 (m, 1 H), 2.98-2.95 (m, 1 H), 2.16 (brs), 1.88-1.87 (m, 2 H), 1.72-1.69 (m, 2 H), 1.55-1.36 (m, 6 H), 0.93 (t, *J* = 7.0 Hz, 3 H) ppm; <sup>13</sup>C NMR (126 MHz, CDCl<sub>3</sub>): δ = 60.8, 56.9, 55.1, 30.7, 28.7, 27.7, 22.7, 14.1 ppm.

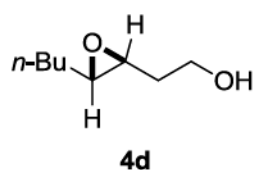

2-((2*S*,3*S*)-3-*Butylloxiran-2-yl*)ethanol (**4d**) was isolated by flash chromatography on silica gel (hexane:EtOAc= 3:1) as a colorless oil (65 mg, 91 %). <sup>1</sup>H NMR (500 MHz, CDCl<sub>3</sub>): δ = 3.80-3.78 (m, 2 H), 2.88-2.86 (m, 1 H), 2.81-2.79 (m, 1 H), 2.00-1.90 (m, 1 H), 1.72-1.68 (m, 2 H), 1.54 (dd, *J* = 13.0, 5.5 Hz, 1 H), 1.45-1.36 (m, 4 H), 0.92 (t, *J* = 7.0 Hz, 3 H) ppm; <sup>13</sup>C NMR (126 MHz, CDCl<sub>3</sub>): δ = 60.2, 58.4, 57.0, 34.3, 31.8, 28.2, 22.6, 14.1 ppm.

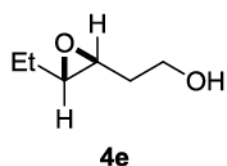

2-((2*S*,3*S*)-3-*Ethylloxiran-2-yl*)ethanol (**4e**) was isolated by flash chromatography on silica gel (hexane:ether= 1:1) as a colorless oil (46 mg, 80 %). [ $\alpha$ ]<sub>D</sub><sup>20</sup> = -42.2 (c = 1.75, EtOH), Lit. [ $\alpha$ ]<sub>D</sub><sup>24</sup> = 17.7 (c = 1.73, EtOH) for (*R*, *R*)-isomer;<sup>12</sup> <sup>1</sup>H NMR (500 MHz, CDCl<sub>3</sub>): δ = 3.80-3.78 (m, 2 H), 2.89-2.87 (m, 1 H), 2.80-2.78 (m, 1 H), 2.15 (brs), 2.00-1.96 (m, 2 H), 1.72-

1.68 (m, 1 H), 1.61-1.57 (m, 2 H), 1.00 (t,  $J=7.0$  Hz, 3 H) ppm.  $^{13}\text{C}$  NMR (126 MHz,  $\text{CDCl}_3$ ):  $\delta = 60.2, 59.5, 56.7, 34.3, 25.1, 9.9$  ppm.

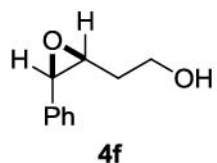

2-((2*S*,3*R*)-3-Phenyloxiran-2-yl)ethanol (**4f**) was isolated by flash chromatography on silica gel (hexane:EtOAc= 3:1) as a colorless syrup (67 mg, 82 %). IR (film): 3390, 3062, 3030, 2924, 1957, 1891, 1817, 1766, 171, 1605, 1584, 1549, 1496, 1453, 1376, 1314, 1256, 1200, 1105, 1050, 912, 883, 786, 742, 700, 623, 549  $\text{cm}^{-1}$ ;  $^1\text{H}$  NMR (500 MHz,  $\text{CDCl}_3$ ):  $\delta = 7.37$ -7.26 (m, 5 H), 4.13 (d,  $J=4.0$  Hz, 1 H), 3.78-3.77 (m, 2 H), 3.42-3.39 (s, 1 H), 1.62-1.54 (m, 3 H) ppm;  $^{13}\text{C}$  NMR (126 MHz,  $\text{CDCl}_3$ ):  $\delta = 135.4, 128.3$  (2 C), 127.8, 126.6 (2 C), 60.6, 57.4, 57.1, 30.0 ppm; HRMS (ESI): calcd. for  $\text{C}_{10}\text{H}_{12}\text{NaO}_2$  [ $\text{M}+\text{Na}$ ] $^+$ : 187.0730 found: 187.0727.

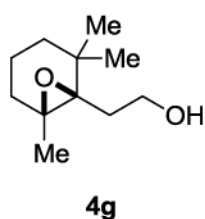

2-((1*R*,6*S*)-2,2,6-Trimethyl-7-oxabicyclo[4.1.0]heptan-1-yl)ethanol (**4g**) was isolated by flash chromatography on silica gel (hexane:EtOAc= 4:1) as a colorless oil (66 mg, 72 %). IR (film): 3417, 2937, 1461, 1385, 1363, 1081, 1046, 891, 674, 584, 538  $\text{cm}^{-1}$ ;  $^1\text{H}$  NMR (500 MHz,  $\text{CDCl}_3$ ):  $\delta = 3.85$ -3.84 (m, 1 H), 3.70-3.68 (m, 1 H), 2.48 (brs, 1 H), 2.00-1.85 (m, 3 H), 1.77-1.75 (m, 1 H), 1.38-1.35 (m, 3 H), 1.34 (s, 3 H), 0.99-0.96 (m, 1 H), 1.02 (s, 3 H), 1.00 (s, 3 H) ppm.  $^{13}\text{C}$  NMR (126 MHz,  $\text{CDCl}_3$ ):  $\delta = 70.0, 63.8, 61.7, 35.2, 34.6, 29.9, 29.1, 26.0, 24.6, 21.8, 17.0$  ppm; HRMS (ESI): calcd. for  $\text{C}_{11}\text{H}_{20}\text{NaO}_2$  [ $\text{M}+\text{Na}$ ] $^+$ : 207.1356 found: 207.1356.

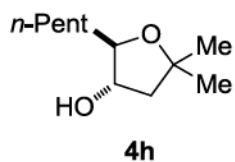

(2*R*,3*S*)-5,5-Dimethyl-2-pentyltetrahydrofuran-3-ol (**4h**) was isolated by flash chromatography on silica gel (hexane:EtOAc= 8:1) as a colorless oil (70 mg, 75 %). IR (film): 3420, 2966, 2930, 2860, 1733, 1717, 1700, 1684, 1653, 1635, 1540, 1521, 1496, 1419, 1365, 1340, 1286, 1145, 1085, 1041, 944, 887, 865, 786, 767, 726, 668, 611  $\text{cm}^{-1}$ ;  $^1\text{H}$  NMR (500 MHz,  $\text{CDCl}_3$ ):  $\delta = 4.10$ -4.00 (m, 1 H), 3.78-3.76 (m, 1 H), 2.08 (dd,  $J=13.0, 7.5$  Hz, 1 H), 1.77 (dd,  $J=13.0, 8.0$  Hz, 2 H), 1.55-1.51 (m, 2 H), 1.41-1.30 (m, 7 H), 1.35 (s, 3 H), 1.26 (s, 3 H), 0.88 (t,  $J=7.0$  Hz, 3 H) ppm;  $^{13}\text{C}$  NMR (126 MHz,  $\text{CDCl}_3$ ):  $\delta = 85.0, 79.9, 77.3, 47.7, 34.4, 32.1, 30.3, 28.9, 25.6, 22.7, 14.2$  ppm; HRMS (ESI): calcd. for  $\text{C}_{11}\text{H}_{22}\text{NaO}_2$  [ $\text{M}+\text{Na}$ ] $^+$ : 209.1512 found: 209.1512.

### Procedure for the Kinetic Resolution of the Secondary Alcohol 5

To a stirred solution of BHA-5 (0.0275 mmol, 5.5 mmol%),  $\text{WO}_2(\text{acac})_2$  (0.025 mmol, 5 mmol%) and NaCl (14.6 mg, 0.25 mmol) in dichloromethane (5 mL) were added 30 % aqueous  $\text{H}_2\text{O}_2$  (0.75 mmol, 77  $\mu\text{L}$ ) and  $\alpha$ -



vinylbenzyl alcohol (0.50 mmol) at room temperature. After stirring for 24 h the solvent was removed in vacuum and the residue was purified by flash chromatography on silica gel (hexane:EtOAc= 4:1 to 2:1) affording the corresponding olefin **5** (29 mg, 43 %) and epoxide **6** (35 mg, 47 %).

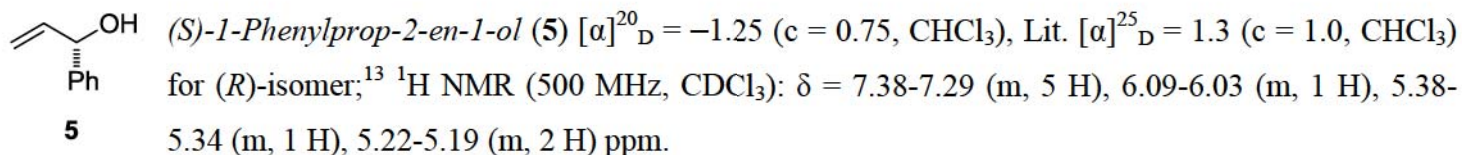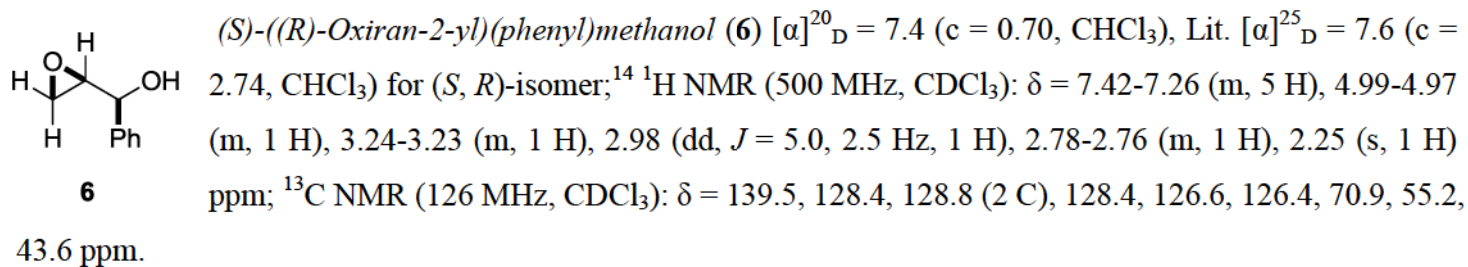

## HPLC and GC data

### Chiral allylic alcohols

| Product                                                                             |    | Conditions                                                                                                                      |
|-------------------------------------------------------------------------------------|----|---------------------------------------------------------------------------------------------------------------------------------|
| 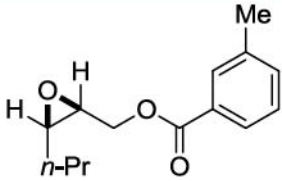   | 2a | HPLC (Chiralcel OB-H): Condition: 98:2 Hexanes/2-Propanol, flow rate 1.0 mL/min; result: 12.8 min (minor), 17.6 min (major)     |
|    | 2b | HPLC (Chiralcel OB-H): Condition: 98:2 Hexanes/2-Propanol, flow rate 1.0 mL/min; result: 8.3 min (minor), 11.7 min (major)      |
|    | 2c | HPLC (Chiralcel OB-H): Condition: 98:2 Hexanes/2-Propanol, flow rate 0.5 mL/min; result: 32.8 min (minor), 35.9 min (major)     |
|   | 2d | HPLC (Chiralcel OB-H): Condition: 98:2 Hexanes/2-Propanol, flow rate 1.0 mL/min; result: 8.1 min (major), 9.2 min (minor)       |
|  | 2e | HPLC (Chiralcel OB-H): Condition: 98:2 Hexanes/2-Propanol, flow rate 1.0 mL/min; result: 12.8 min (major), 14.5 min (minor)     |
|  | 2f | HPLC (Chiralcel OD-H): Condition: 95:5 Hexanes/2-Propanol, flow rate 1.0 mL/min; result: 24.1 min (major), 27.4 min (minor)     |
|  | 2g | HPLC (Chiralcel OJ-H): Condition: 97.5:2.5 Hexanes/2-Propanol, flow rate 1.0 mL/min; result: 14.7 min (minor), 16.7 min (major) |
|  | 2h | HPLC (Chiralcel OD-H): Condition: 95:5 Hexanes/2-Propanol, flow rate 1.0 mL/min; result: 10.9 min (major), 14.3 min (minor)     |

|                                                                                     |    |                                                                                                                                                                                                                                                                                                 |
|-------------------------------------------------------------------------------------|----|-------------------------------------------------------------------------------------------------------------------------------------------------------------------------------------------------------------------------------------------------------------------------------------------------|
| 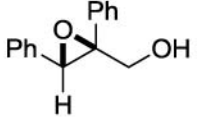    | 2i | HPLC (Chiralcel OD-H): Condition: 95:5 Hexanes/2-Propanol, flow rate 1.0 mL/min; result: 13.2 min (major), 15.4 min (minor)                                                                                                                                                                     |
|    | 2j | HPLC (Chiralcel OJ-H): Condition: 99:1 Hexanes/2-Propanol, flow rate 1.0 mL/min; result: 10.3 min (major), 11.2 min (minor)                                                                                                                                                                     |
|    | 2k | HPLC (Chiralpak IC): Condition: 97:3 Hexanes/2-Propanol, flow rate 1.0 mL/min; result: 36.9 min (minor), 39.2 min (major)                                                                                                                                                                       |
|     | 2l | HPLC (Chiralcel OB-H): Condition: 99:1 Hexanes/2-Propanol, flow rate 1.0 mL/min; result: 10.9 min (major), 15.7 min (minor)                                                                                                                                                                     |
|   | 2m | HPLC (Chiralpak IA): Condition: 95:5 Hexanes/2-Propanol, flow rate 1.0 mL/min; result: 15.7 min (major), 17.2 min (minor)                                                                                                                                                                       |
|  | 2n | GC (Chiraldex B-DP): Condition: injection temperature 100 °C, column temp. = 50 to 65 °C at a rate of 1 °C/min, 65 °C for 30 min, 65 °C to 70 °C at a rate of 1 °C/min, 70 °C for 30 min, injection pressure = 120 kpa, detector temperature 250 °C; result: 65.1 min (minor), 66.1 min (major) |
|   | 2u | HPLC (Chiralpak IA): Condition: 95:5 Hexanes/2-Propanol, flow rate 1.0 mL/min; result: 16.3 min (major), 18.2 min (minor)                                                                                                                                                                       |

|                                                                                   |    |                                                                                                                                                                  |
|-----------------------------------------------------------------------------------|----|------------------------------------------------------------------------------------------------------------------------------------------------------------------|
| 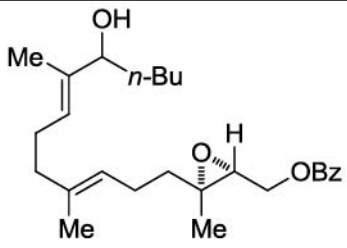   | 2v | HPLC (Chiralpak IB): Condition: 97:3 Hexanes/2-Propanol, flow rate 1.0 mL/min; result: 11.3 min (major), 19.6 min (minor) and 12.3 min (major), 14.7 min (minor) |
|  | 5  | HPLC (Chiralcel OD-H): Condition: 95:5 Hexanes/2-Propanol, flow rate 1.0 mL/min; result: 10.0 min (minor), 12.2 min (major)                                      |
|  | 6  | HPLC (Chiralcel OD-H): Condition: 98.5:1.5 Hexanes/2-Propanol, flow rate 1.0 mL/min; result: 44.0 min (major), 51.7 min (minor)                                  |

### Chiral homoallylic alcohols

| Product                                                                             |    | Conditions                                                                                                                  |
|-------------------------------------------------------------------------------------|----|-----------------------------------------------------------------------------------------------------------------------------|
| 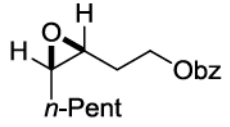   | 4a | HPLC (Chiralcel OJ-H): Condition: 99:1 Hexanes/2-Propanol, flow rate 1.0 mL/min; result: 14.9 min (major), 18.8 min (minor) |
|  | 4b | HPLC (Chiralcel OB-H): Condition: 98:2 Hexanes/2-Propanol, flow rate 1.0 mL/min; result: 27.5 min (minor), 37.6 min (major) |
|  | 4c | HPLC (Chiralcel OJ-H): Condition: 99:1 Hexanes/2-Propanol, flow rate 1.0 mL/min; result: 17.1 min (major), 20.1 min (minor) |
|   | 4d | HPLC (Chiralcel OJ-H): Condition: 99:1 Hexanes/2-Propanol, flow rate 1.0 mL/min; result: 14.5 min (minor), 17.6 min (major) |
|  | 4e | HPLC (Chiralcel OB-H): Condition: 98:2 Hexanes/2-Propanol, flow rate 1.0 mL/min; result: 22.7 min (major), 25.4 min (minor) |
|  | 4f | HPLC (Chiralcel OB-H): Condition: 95:5 Hexanes/2-Propanol, flow rate 1.0 mL/min; result: 18.5 min (major), 21.9 min (minor) |

|                                                                                   |                  |                                                                                                                                                                                                  |
|-----------------------------------------------------------------------------------|------------------|--------------------------------------------------------------------------------------------------------------------------------------------------------------------------------------------------|
| 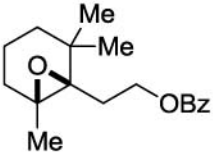  | <p><b>4g</b></p> | <p>HPLC (Chiralcel OD-H): Condition: 99:1 Hexanes/2-Propanol, flow rate 1.0 mL/min; result: 7.0 min (minor), 8.6 min (major)</p>                                                                 |
|  | <p><b>4h</b></p> | <p>GC (Chiraldex B-DM): Condition: injection temperature 110 °C, column temp. = 80 °C, injection pressure = 120 kpa, detector temperature 250 °C; result: 72.2 min (major), 85.8 min (minor)</p> |

# Detailed Reaction Conditions for the Investigation of the Chemoselectivity of Different Types of Allylic and Homoallylic Alcohols

## For allylic alcohols:

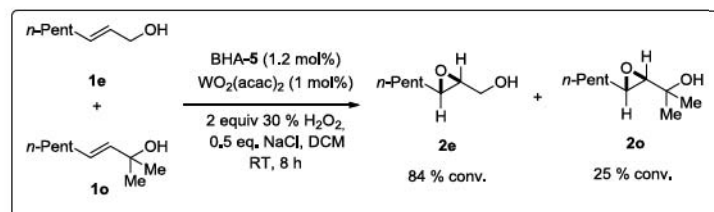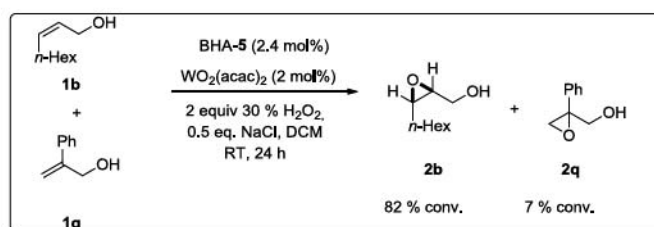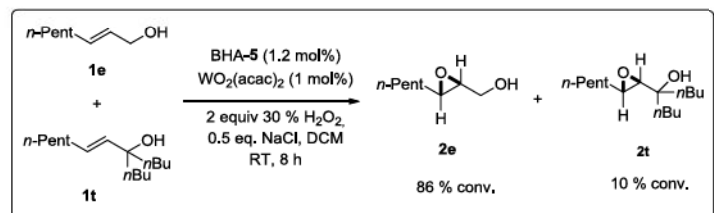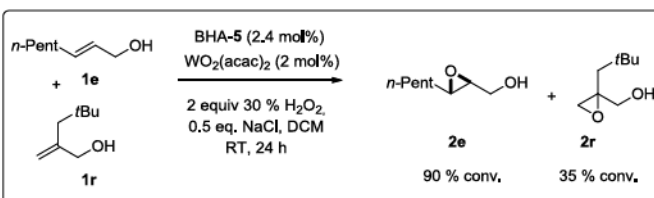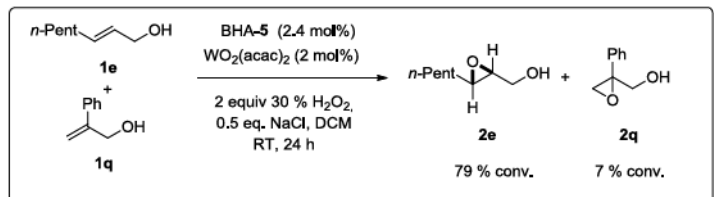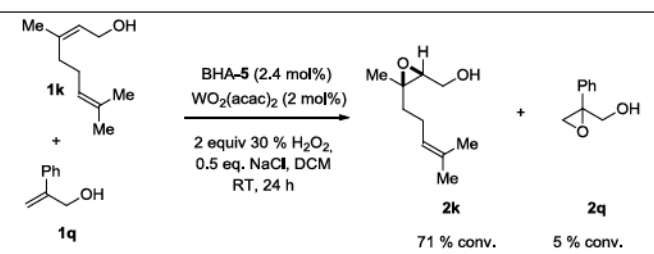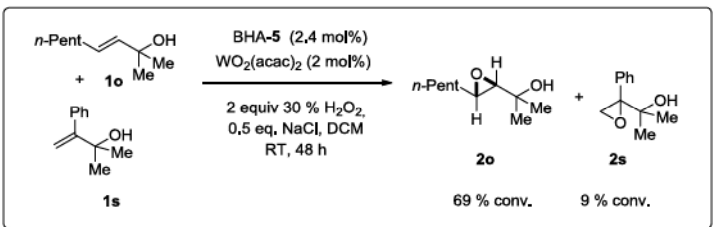

## For homoallylic alcohols:

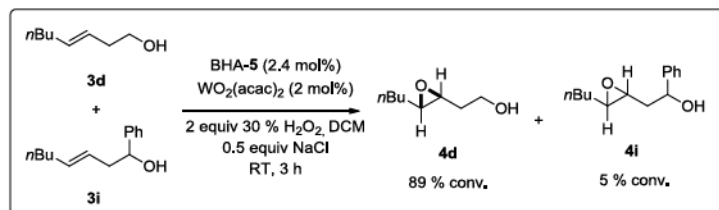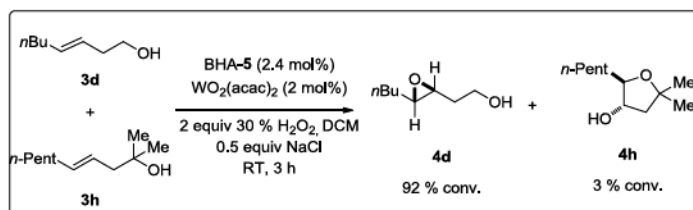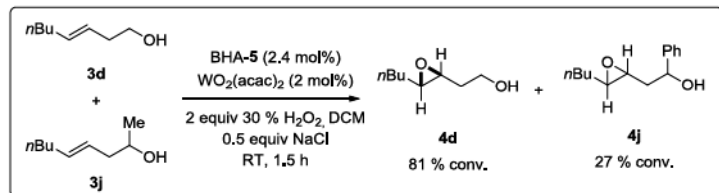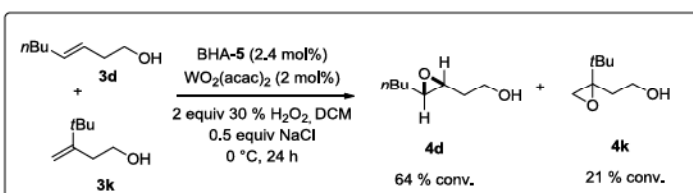

## References

1. Barlan, A. U.; Zhang, W.; Yamamoto, H. *Tetrahedron* **2007**, *63*, 6075.
2. Jimeno, C.; Pasto, M.; Riera, A.; Pericas, M. A. *J. Org. Chem.* **2003**, *68*, 3130.
3. Mirzabekova, N. S.; Kur'zmina, N. Z.; Lukashov, O. I.; Sokolova, N. A.; Golosov, S. N.; Kazakov, P. V.; Perlova, T. G.; Potapova, V. V.; Kheiman, V. A.; Ivanova, G. B. *Russ. J. Org. Chem.* **2003**, *68*, 3130.
4. Fujihara, T.; Xu, T.; Semba, K.; Terao, J.; Tsuji, Y. *Angew. Chem. Int. Ed.* **2011**, *50*, 523.
5. Marshall, J. A.; Hann, R. K. *J. Org. Chem.* **2008**, *73*, 6753.
6. Spivey, A. C.; Laraia, L.; Bayaly, A. R.; Rzepa, H. S.; White, A. J. P. *Org. Lett.* **2010**, *12*, 900.
7. Yu, S.-B.; Holm, R. H. *Inorg. Chem.* **1989**, *28*, 4385.
8. Egami, H.; Ogama, T.; Katsuki, T. *J. Am. Chem. Soc.* **2010**, *132*, 5886.
9. Li, X.; Borhan, B. *J. Am. Chem. Soc.* **2008**, *130*, 16126.
10. Malkov, A. V.; Czemery, L.; Malyshev, D. A. *J. Org. Chem. Chem.* **2009**, *74*, 3350.
11. Li, Z.; Yamamoto, H. *J. Am. Chem. Soc.* **2010**, *132*, 7878.
12. Rosstier, B. E.; Sharpless, K. B. *J. Org. Chem. Chem.* **1984**, *49*, 3707.
13. Lin, H.; Liu, Y.; Wu, Z-L. *Chem. Commun.* **2011**, *47*, 2610.
14. Palazón, J. M.; Añorbe, B.; Martins, V. S. *Tetrahedron Lett.* **1986**, *27*, 4987.

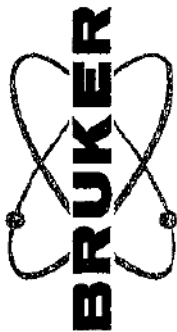

Current Data Parameters  
NAME cw329a  
EXPNO 1  
PROCNO 1

F2 - Acquisition Parameters  
Date\_ 20130503  
Time 16.06  
INSTRUM spect  
PROBHD 5 mm PATXI 1H/  
PULPROG zg  
TD 59998  
SOLVENT CDCl3  
NS 16  
DS 0  
SWH 10000.000 Hz  
FIDRES 0.166672 Hz  
AQ 2.9999001 sec  
RG 196.79  
DW 50.000 usec  
DE 10.00 usec  
TE 295.8 K  
D1 3.0000000 sec  
TD0 1

CHANNEL f1  
SFO1 500.1330885 MHz  
NUC1 1H  
P1 8.00 usec  
PLW1 12.19999981 W

F2 - Processing parameters  
SI 65536  
SF 500.1300130 MHz  
WDW EM  
SSB 0  
LB 0.30 Hz  
GB 0  
PC 1.00

7.620  
7.616  
7.606  
7.604  
7.599  
7.595  
7.586  
7.582  
7.578  
7.458  
7.455  
7.451  
7.443  
7.438  
7.434  
7.431  
7.428  
7.367  
7.365  
7.362  
7.354  
7.350  
7.346  
7.335

2.865

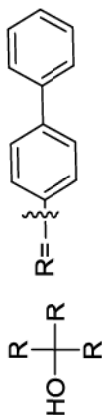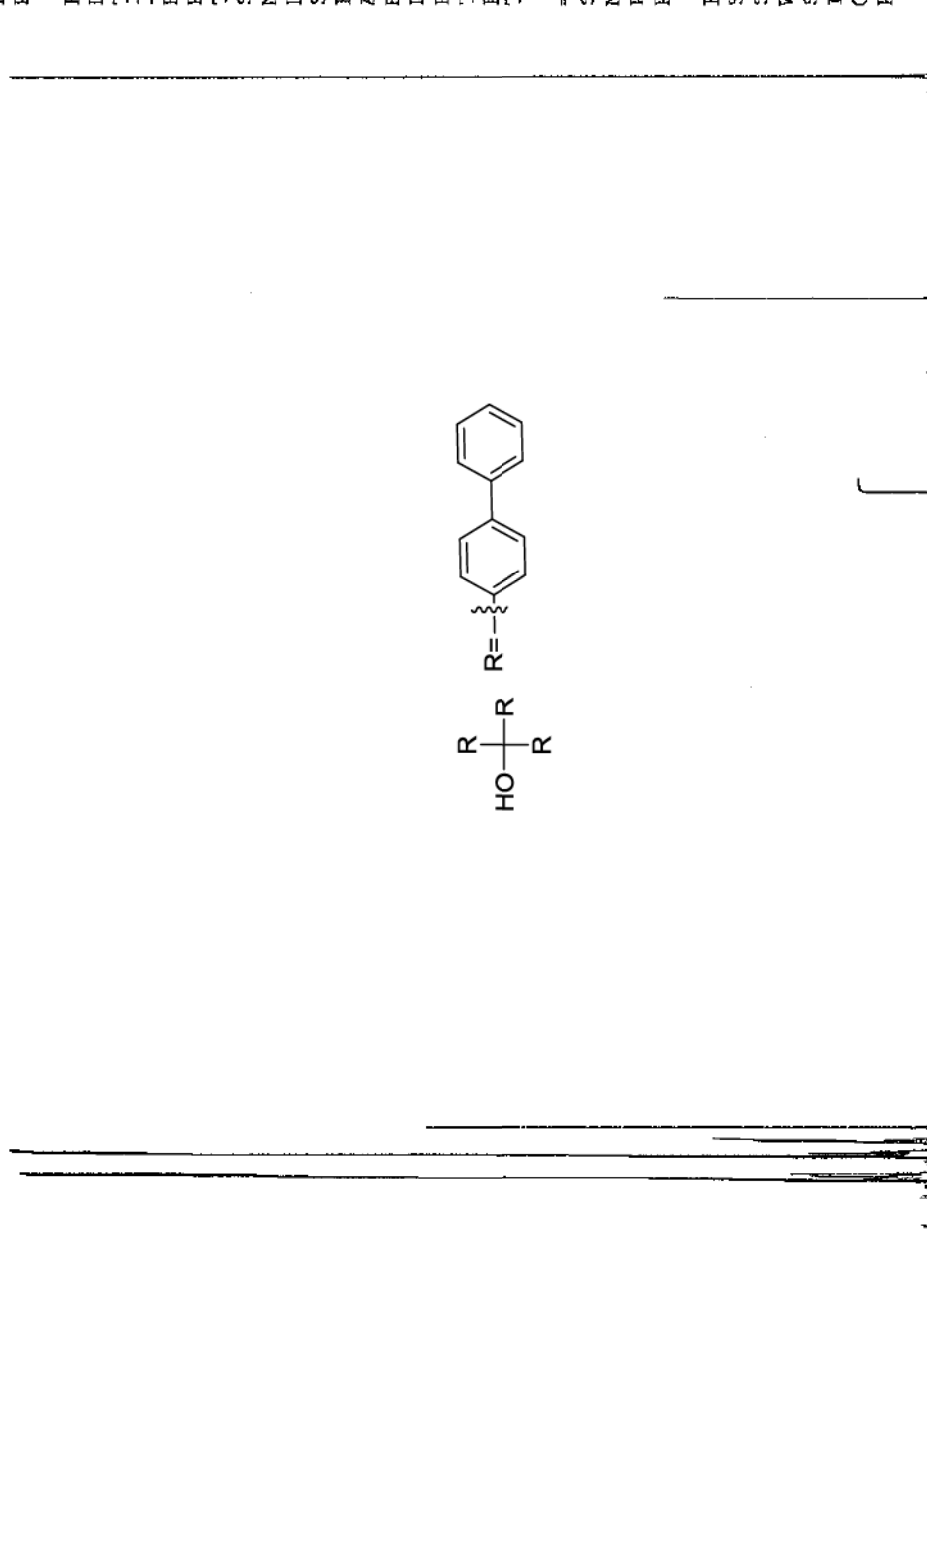

10 9 8 7 6 5 4 3 2 1 ppm

12.34  
12.46  
2.96

1.00



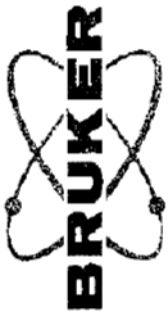

Current Data Parameters  
 NAME cw324d1  
 EXPNO 1  
 PROCNO 1

F2 - Acquisition Parameters  
 Date\_ 20130721  
 Time 14.19  
 INSTRUM spect  
 PROBD 5 mm PAIXI 1H/  
 PULPROG zg  
 TD 59998  
 SOLVENT CDCl3  
 NS 8  
 DS 0  
 SWH 10000.000 Hz  
 FIDRES 0.165672 Hz  
 AQ 2.9999001 sec  
 RG 31.72  
 DW 50.000 usec  
 DE 10.00 usec  
 TE 295.2 K  
 D1 5.00000000 sec  
 TDO 1

==== CHANNEL f1 =====  
 SF01 500.1330885 MHz  
 NUC1 1H  
 P1 8.00 usec  
 PLW1 12.19999981 W

F2 - Processing parameters  
 SI 65536  
 SF 500.1300162 MHz  
 EM  
 WDW 0  
 SSB 0  
 LB 0.30 Hz  
 GB 0  
 PC 1.00

7.283  
 7.279  
 7.276  
 7.039  
 7.035

2.771  
 1.226

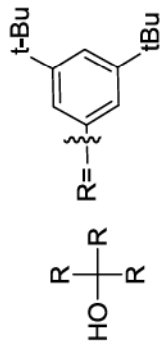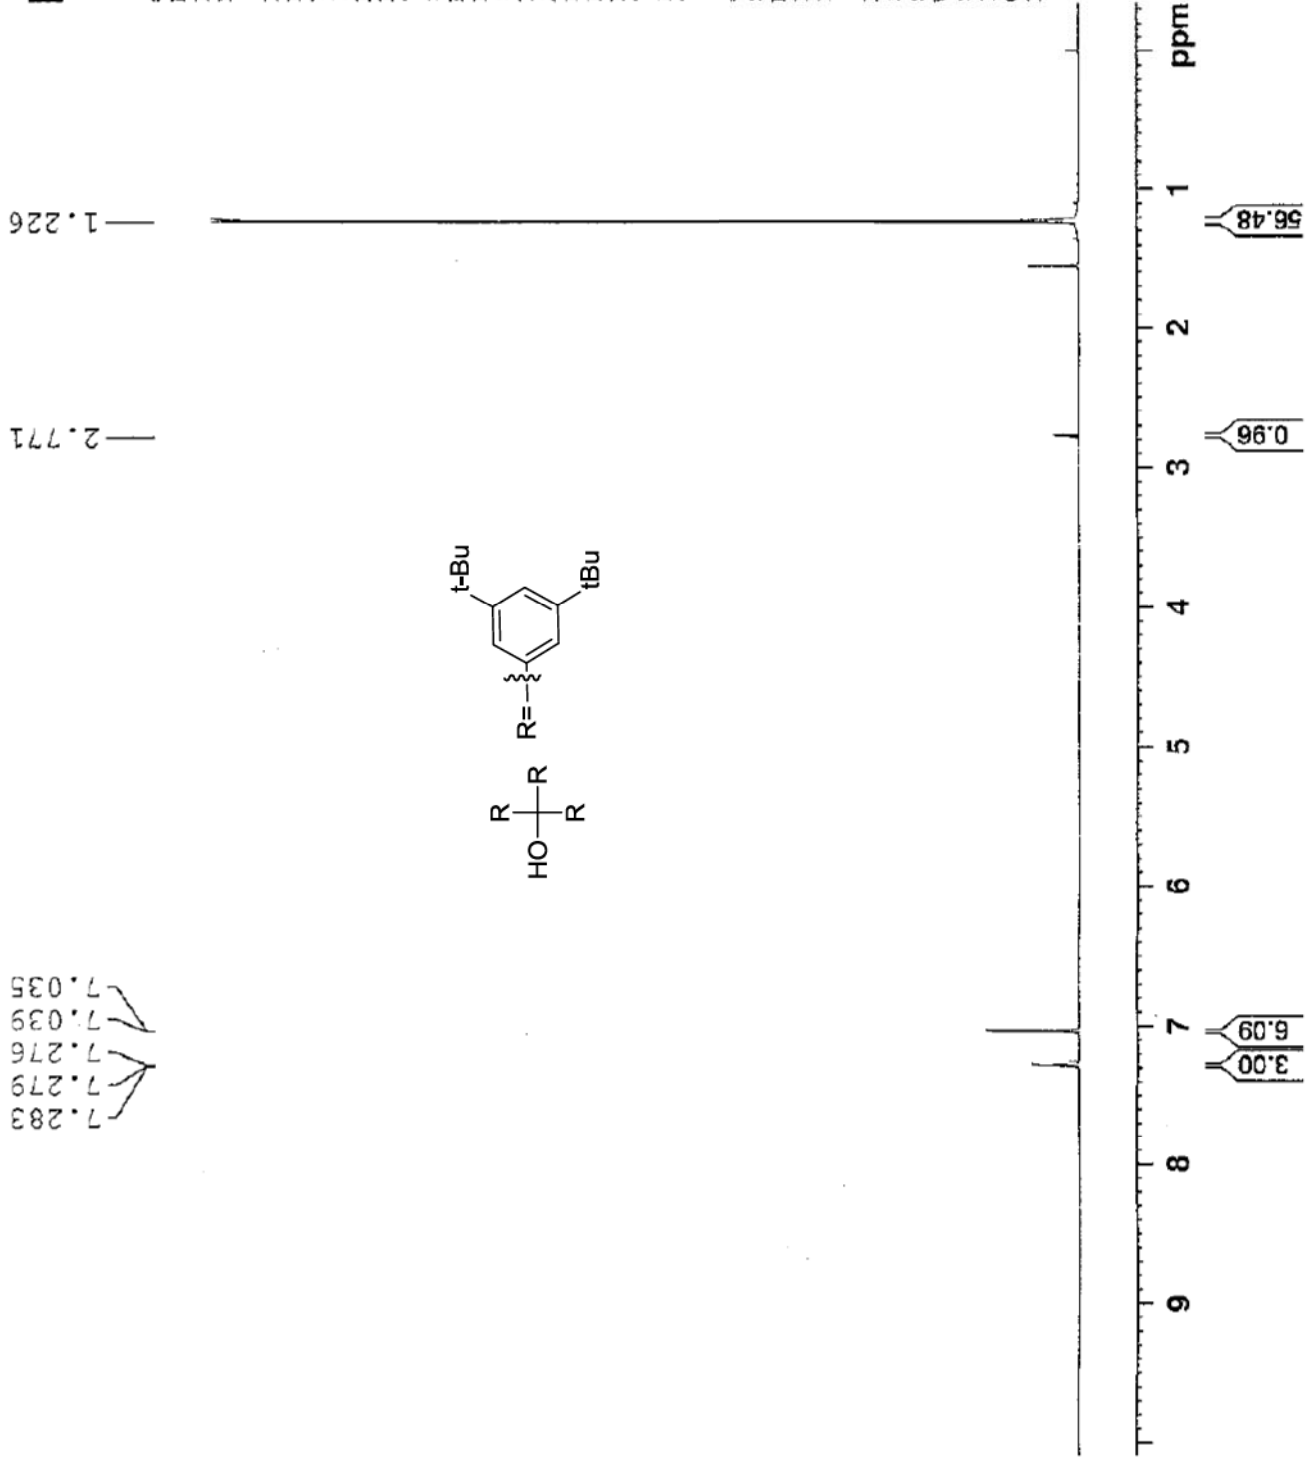

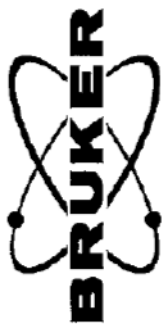

Current Data Parameters  
 NAME cw324a-13c  
 EXPNO 1  
 PROCNO 1

F2 - Acquisition Parameters

Date\_ 20130721  
 Time 15.03  
 INSTRUM spect  
 PROBHD 5 mm QNP 1H/13  
 PULPROG zgdc  
 TD 142854  
 SOLVENT CDCl3  
 NS 475  
 DS 0  
 SWH 32679.738 Hz  
 FIDRES 0.228763 Hz  
 AQ 2.1857162 sec  
 RG 18390.4  
 DW 15.300 usec  
 DE 7.50 usec  
 TE 294.9 K  
 D1 2.0000000 sec  
 d11 0.0300000 sec  
 TDO 1

==== CHANNEL f1 =====  
 NUC1 13C  
 P1 8.50 usec  
 PL1 0.00 dB  
 SFO1 125.7049802 MHz

==== CHANNEL f2 =====  
 CDPORG2 waltz16  
 NUC2 1H  
 PCPD2 90.00 usec  
 PL2 1.00 dB  
 PLL2 21.00 dB  
 SFO2 499.8734991 MHz

F2 - Processing parameters  
 SI 65536  
 SF 125.6923982 MHz  
 WDW EM  
 SSB 0  
 LB 1.00 Hz  
 GB 0  
 PC 1.40

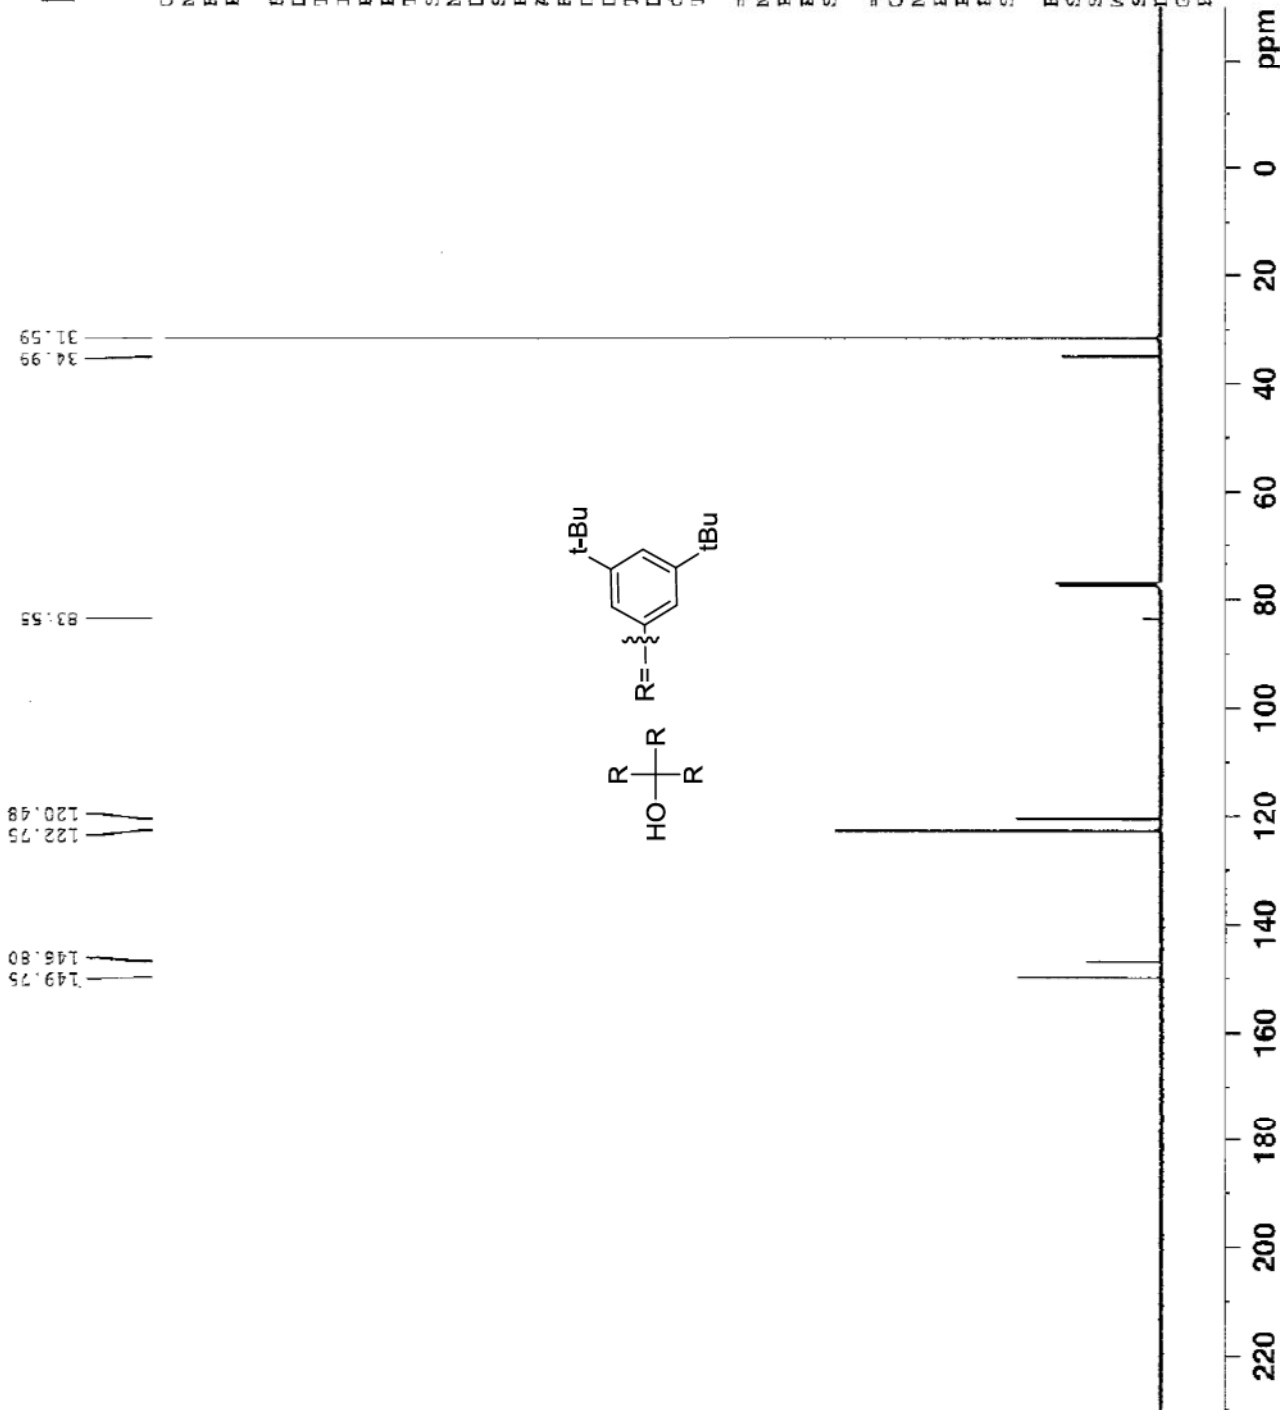

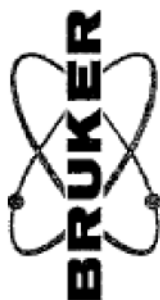

Current Data Parameters  
NAME cw330a  
EXPNO 1  
PROCNO 1

F2 - Acquisition Parameters  
Date\_ 20130305  
Time 17.07  
INSTRUM spect  
PROBHD 5 mm PATXI 1H/  
PULPROG zg  
TD 59398  
SOLVENT CDCl3  
NS 24  
DS 0  
SWH 10000.000 Hz  
FIDRES 0.166672 Hz  
AQ 2.9999001 sec  
RG 196.79  
DW 50.000 usec  
DE 10.00 usec  
TE 295.9 K  
D1 3.00000000 sec  
TD0 1

===== CHANNEL f1 =====  
SF01 500.130885 MHz  
NUC1 1H  
P1 8.00 usec  
PLW1 12.19999981 W

F2 - Processing parameters  
SI 65536  
SF 500.1300135 MHz  
WDW EM  
SSB 0  
LB 0.30 Hz  
GB 0  
PC 1.00

7.588  
7.546  
7.543  
7.529  
7.525  
7.440  
7.436  
7.425  
7.412  
7.410  
7.373  
7.356  
7.348  
7.346  
7.343  
7.335  
7.331  
7.327  
7.316

3.859

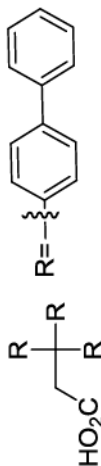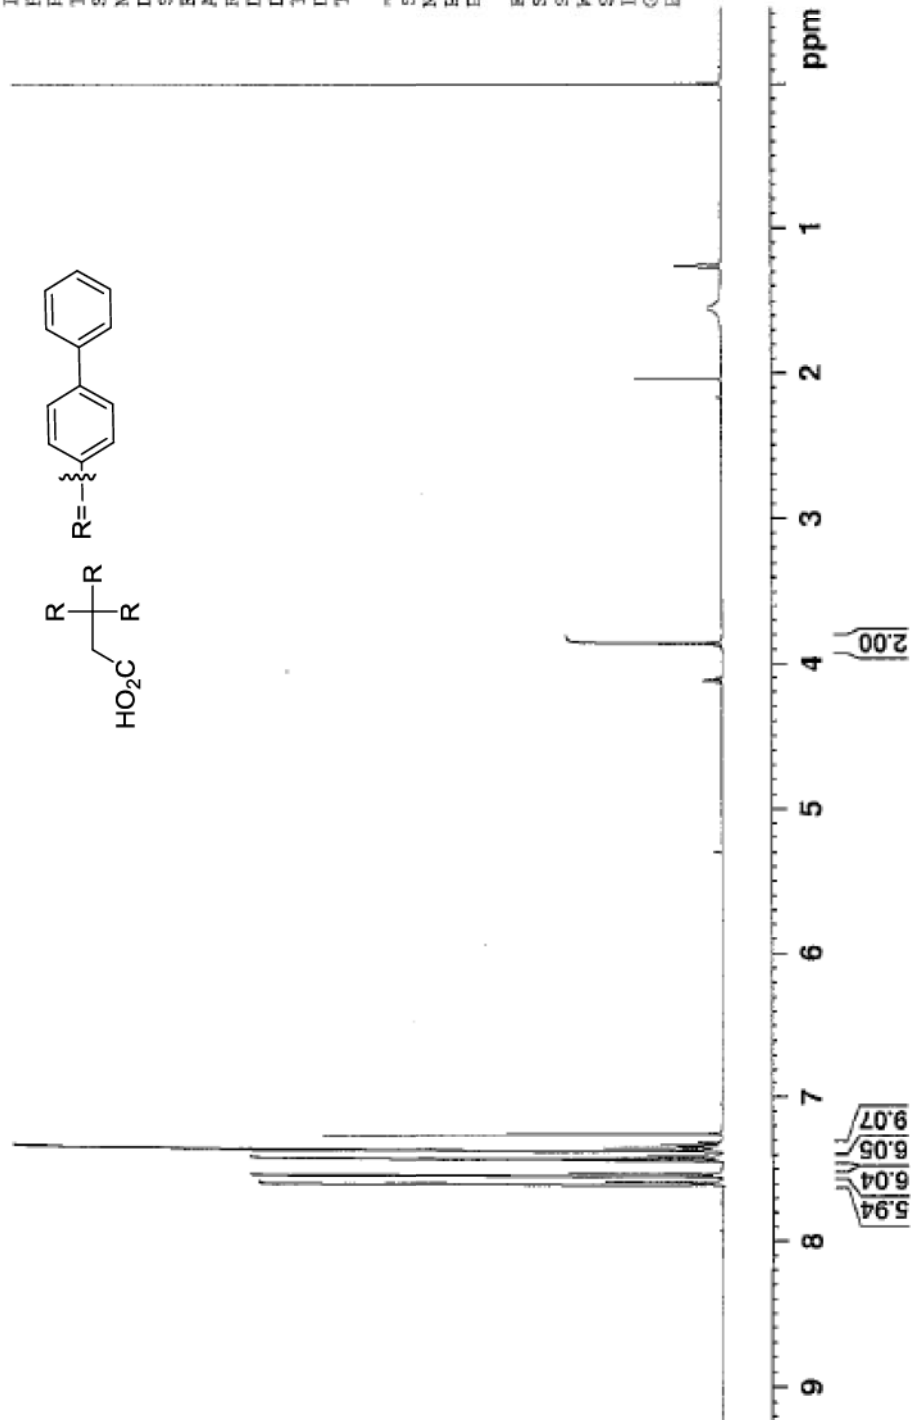

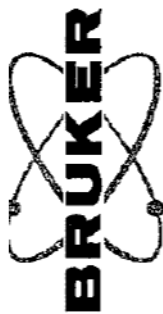

Current Data Parameters  
 NAME cw330a1-13C  
 EXPNO 1  
 PROCNO 1

F2 - Acquisition Parameters  
 Date\_ 20130731  
 Time 17.45  
 INSTRUM spect  
 PROBHD 5 mm PAXI 1H/  
 PULPROG zgpg  
 TD 178568  
 SOLVENT CDCl3  
 NS 310  
 DS 0  
 SWH 32894.738 Hz  
 FIDRES 0.184214 Hz  
 AQ 2.7142336 sec  
 RG 196.79  
 DW 15.200 usec  
 DE 10.00 usec  
 TE 295.6 K  
 D1 1.0000000 sec  
 D11 0.0300000 sec  
 TDO 1

===== CHANNEL f1 =====  
 SFO1 125.7703648 MHz  
 NUC1 13C  
 P1 14.00 usec  
 PLW1 170.0000000 W

===== CHANNEL f2 =====  
 SFO2 500.1320005 MHz  
 NUC2 1H  
 CPDPRG12 waltz16  
 PCPD2 90.00 usec  
 PLW2 12.19999981 W  
 PLW12 0.20893000 W

F2 - Processing parameters  
 SI 131072  
 SF 125.7577784 MHz  
 WDW EM  
 SSB 0  
 LB 0 1.00 Hz  
 GB 0  
 PC 1.40

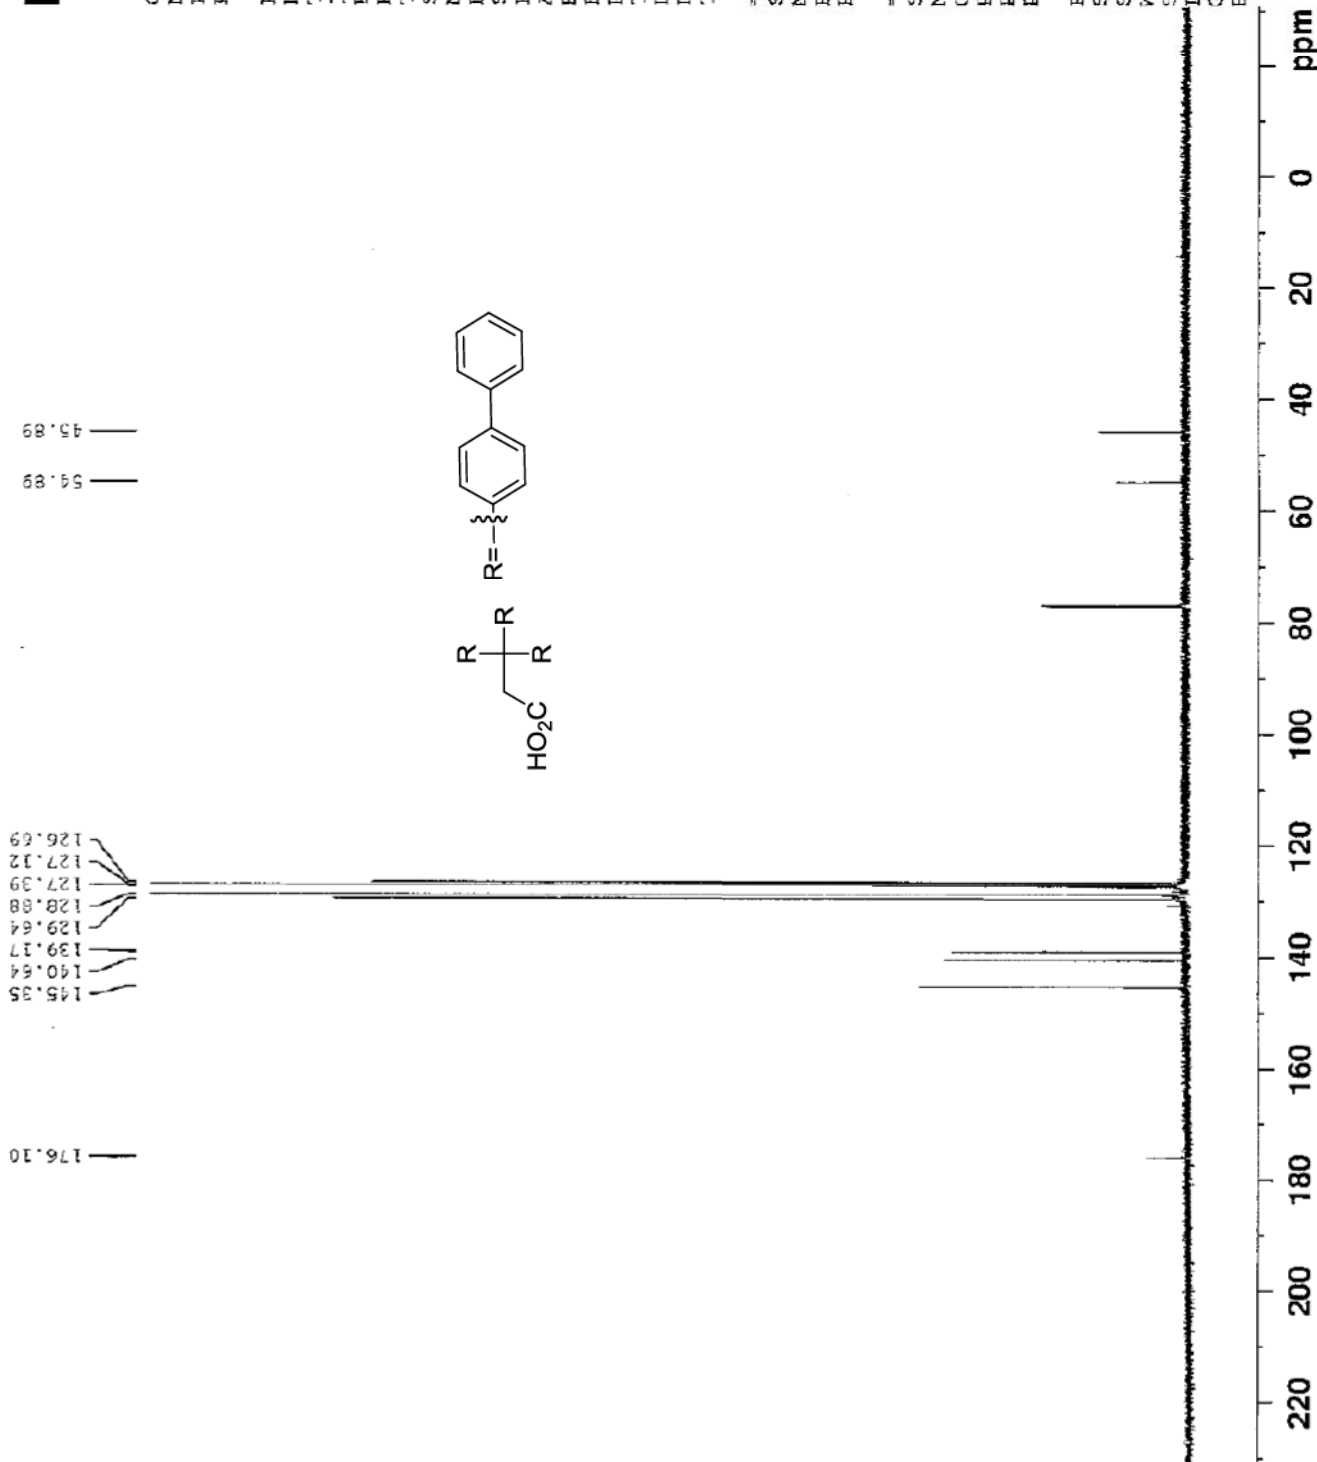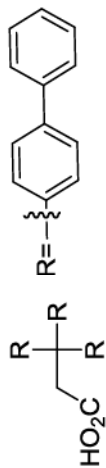

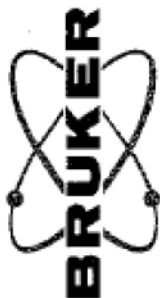

Current Data Parameters  
NAME cw325a1  
EXPNO 1  
PROCNO 1

F2 - Acquisition Parameters  
Date\_ 20130721  
Time 14.25  
INSTRUM spect  
PROBHD 5 mm PAXI 1H/  
PULPROG zg  
TD 59998  
SOLVENT CDCl3  
NS 8  
DS 0  
SWH 10000.000 Hz  
FIDRES 0.166672 Hz  
AQ 2.9999001 sec  
RG 31.72  
EW 50.000 usec  
DE 10.00 usec  
TE 295.2 K  
D1 5.0000000 sec  
TDO 1

CHANNEL f1  
SFO1 500.1330885 MHz  
NUC1 1H  
P1 8.00 usec  
PLW1 12.19999981 W

F2 - Processing parameters  
SI 6536  
SF 500.1300152 MHz  
WDW EM  
SSB 0  
LB 0.30 Hz  
GB 0  
PC 1.00

7.192  
7.189  
7.186  
7.939  
6.936

3.715

1.180

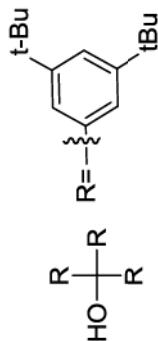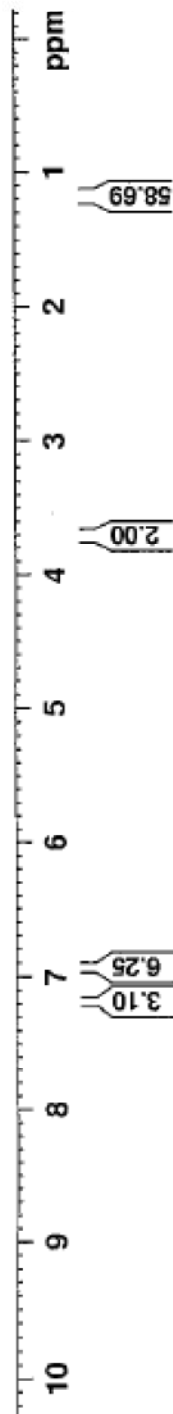

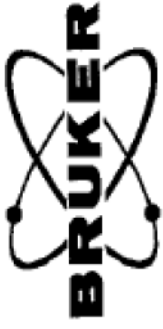

Current Data Parameters  
 NAME cw325a-13C  
 EXPNO 1  
 PROCNO 1

F2 - Acquisition Parameters  
 Date\_ 20130721  
 Time 14.09  
 INSTRUM spect  
 PROBD 5 mm QNP 1H/13  
 PULPROG zgpgc  
 TD 142854  
 SOLVENT CDCl3  
 NS 537  
 DS 0  
 SWH 32679.738 Hz  
 FIDRES 0.228763 Hz  
 AQ 2.1857162 sec  
 RG 18390.4  
 DW 15.300 usec  
 DE 7.50 usec  
 TE 294.8 K  
 D1 2.00000000 sec  
 d11 0.03000000 sec  
 TDO 1

===== CHANNEL f1 =====  
 NUCL1 13C  
 P1 8.50 usec  
 PL1 0.00 dB  
 SFO1 125.7049802 MHz

===== CHANNEL f2 =====  
 CPDPRG2 waltz16  
 NUC2 1H  
 PCPD2 90.00 usec  
 PL2 1.00 dB  
 PL12 21.00 dB  
 SFO2 499.8734991 MHz

F2 - Processing parameters  
 SI 65536  
 SF 125.6923974 MHz  
 WDW EM  
 SSB 0  
 LB 1.00 Hz  
 GB 0  
 PC 1.40

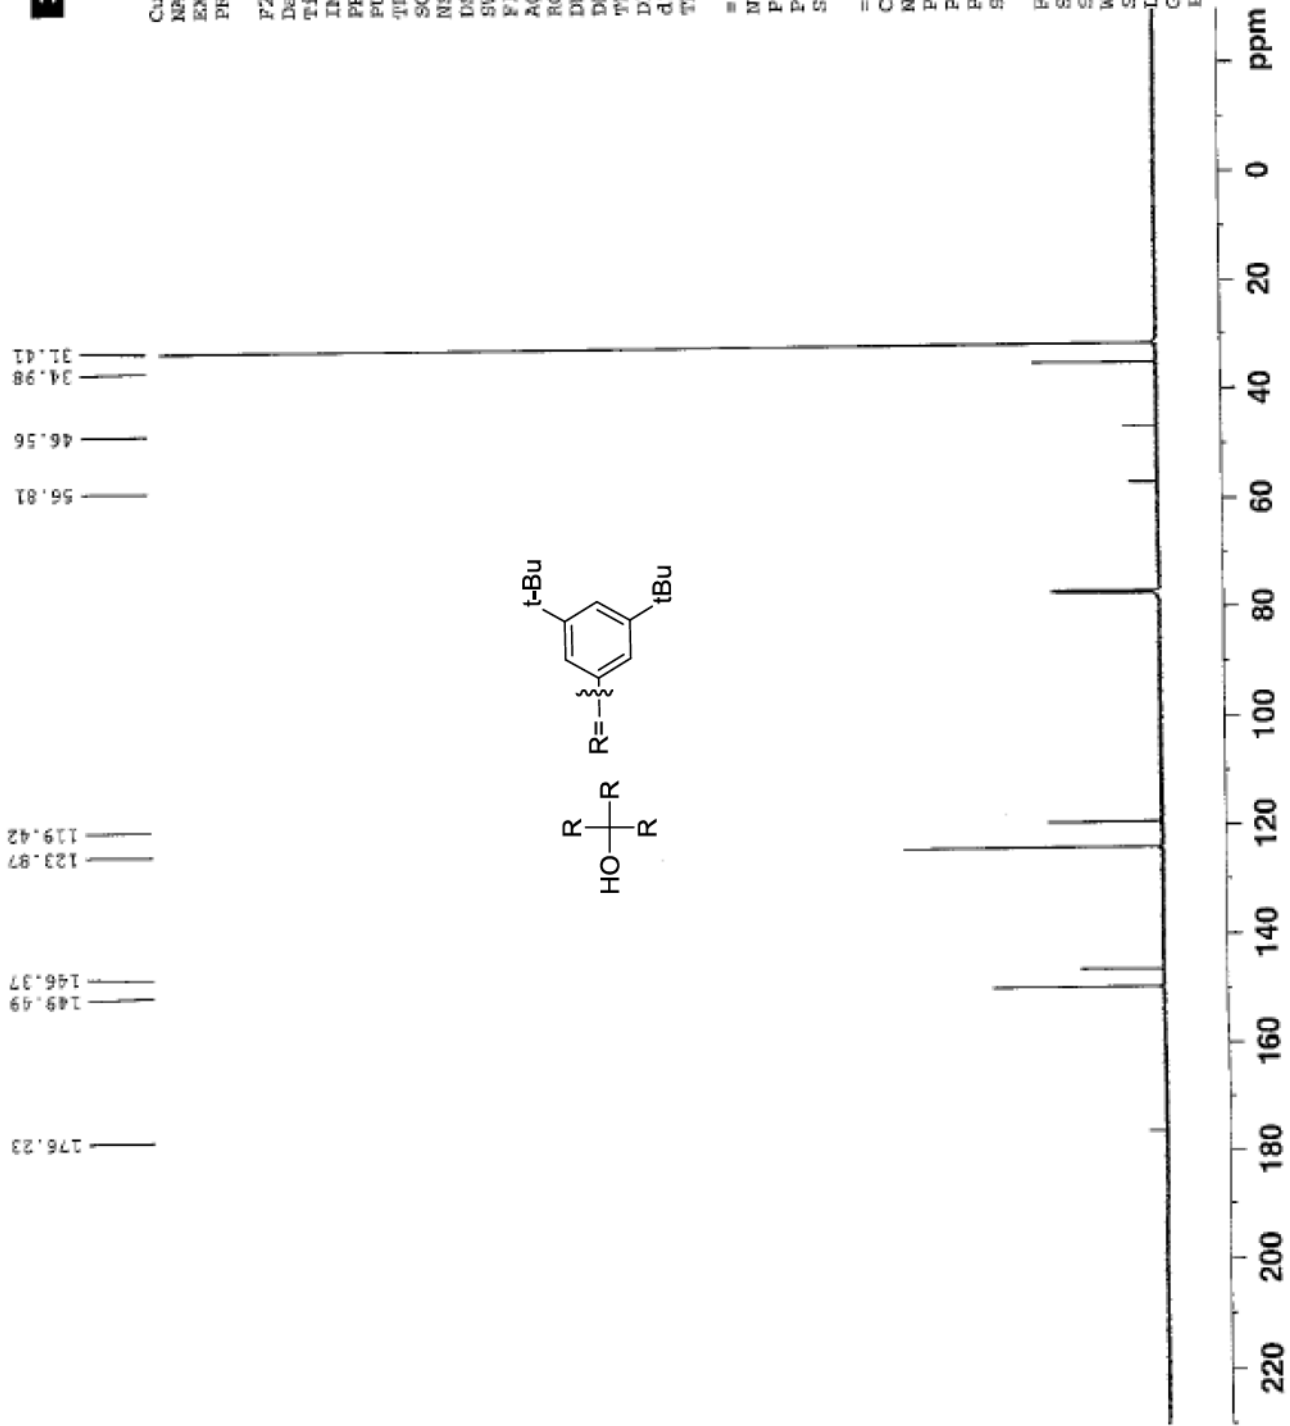

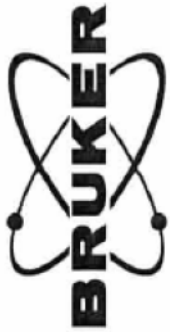

Current Data Parameters  
 NAME Cw333a  
 EXPNO 1  
 PROCNO 1

F2 - Acquisition Parameters  
 Date\_ 20130803  
 Time 13.08  
 INSTRUM spect  
 PROBHD 5 mm QNP 1H/13  
 PULPROG zg  
 TD 59998  
 SOLVENT CDCl3  
 NS 8  
 DS 0  
 SWH 10000.000 Hz  
 FIDRES 0.166672 Hz  
 AQ 2.9999499 sec  
 RG 406.4  
 DW 50.000 usec  
 DE 7.50 usec  
 TE 293.7 K  
 D1 5.00000000 sec  
 TD0 1

==== CHANNEL f1 =====  
 NUC1 1H  
 P1 10.00 usec  
 PL1 0.00 dB  
 SFO1 499.8740056 MHz

F2 - Processing parameters  
 SI 32768  
 SF 499.8700277 MHz  
 EM  
 SSB 0  
 LB 0.30 Hz  
 GB 0  
 PC 1.00

1.579  
1.565  
1.458  
1.353  
1.026

4.280  
3.950  
3.932  
3.780  
3.749

8.445  
7.556  
7.542  
7.469  
7.453  
7.405  
7.390  
7.382  
7.377  
7.374  
7.365  
7.320  
7.306  
7.291  
7.245

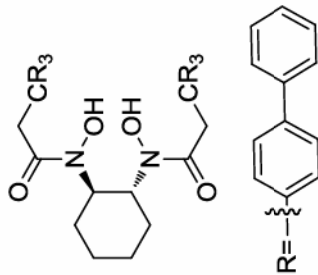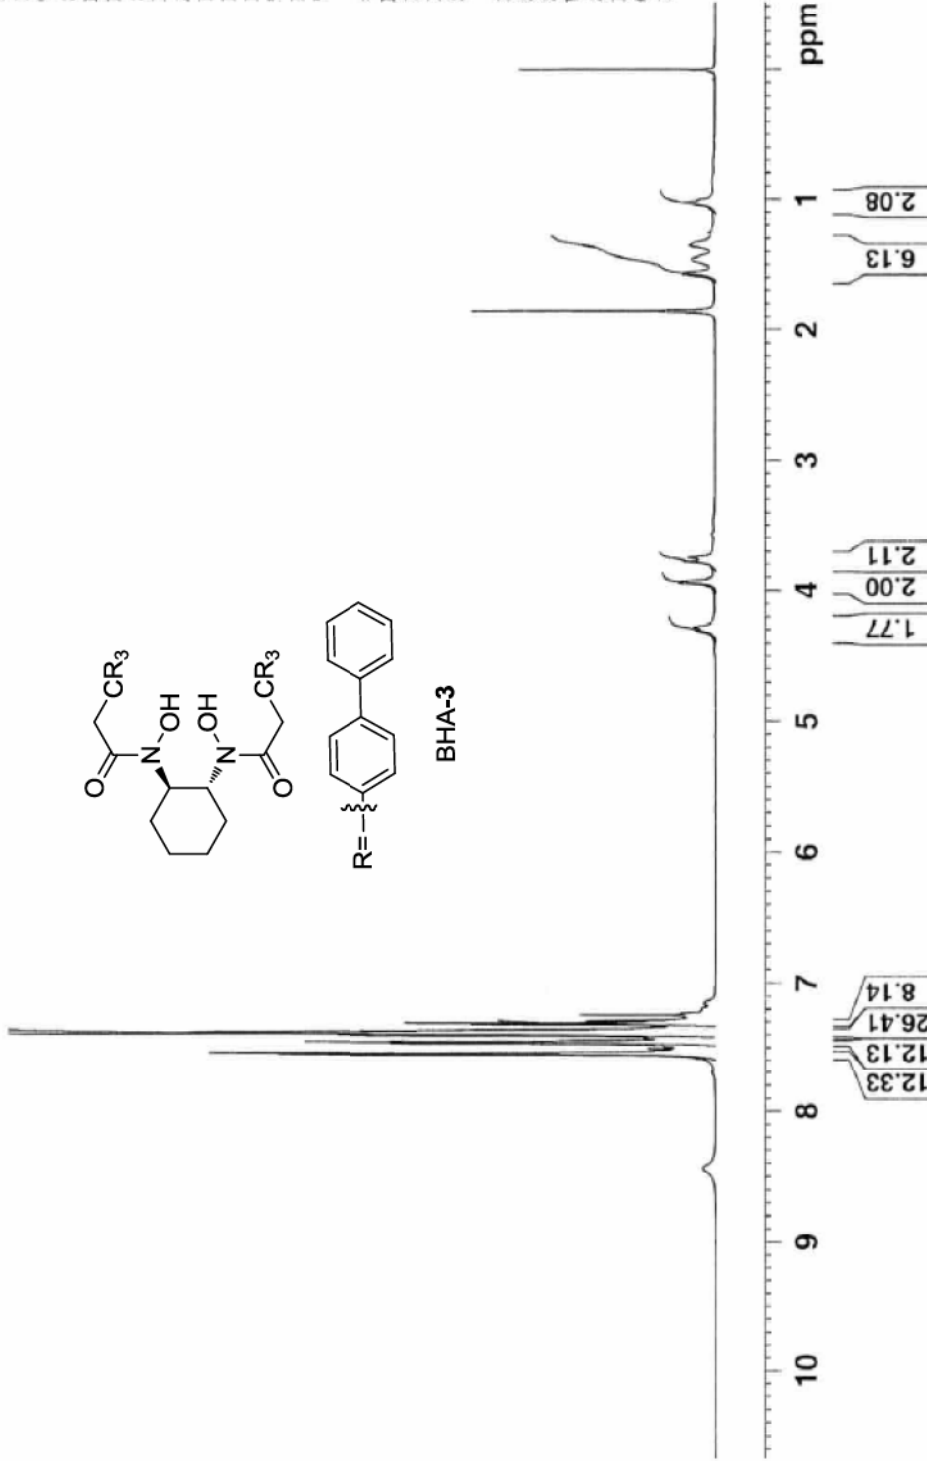

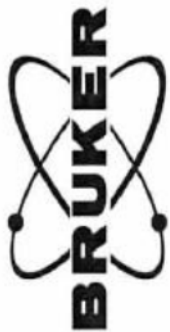

Current Data Parameters  
NAME cw333a-13c  
EXPNO 1  
PROCNO 1

F2 - Acquisition Parameters  
Date\_ 20130803  
Time 14.33  
INSTRUM spect  
PROBHD 5 mm QNP 1H/13  
PULPROG zgdc  
TD 142854  
SOLVENT CDCl3  
NS 884  
DS 0  
SWH 32679.738 Hz  
FIDRES 0.228763 Hz  
AQ 2.1857162 sec  
RG 32768  
DW 15.300 usec  
DE 7.50 usec  
TE 294.6 K  
D1 3.00000000 sec  
d11 0.03000000 sec  
TDO 1

==== CHANNEL f1 =====  
NUC1 13C  
P1 8.50 usec  
PL1 0.00 dB  
SFO1 125.7049802 MHz

==== CHANNEL f2 =====  
CFDPRG2 waltz16  
NUC2 1H  
PCPD2 90.00 usec  
PL2 1.00 dB  
PL12 21.00 dB  
SFO2 499.8734991 MHz

F2 - Processing parameters  
SI 65536  
SF 125.6924015 MHz  
WDW EM  
SSB 0  
LB 1.00 Hz  
GB 0  
PC 1.40

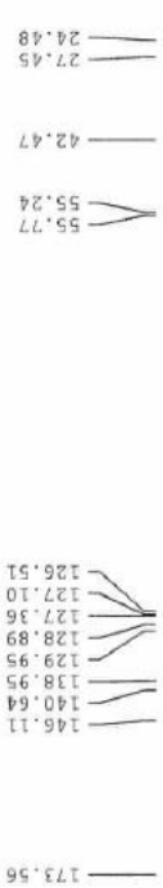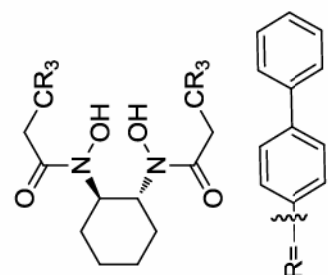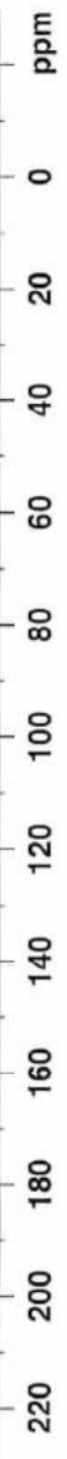



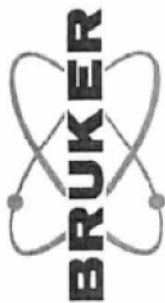

Current Data Parameters  
 NAME cw328a1  
 EXPNO 1  
 PROCNO 1

F2 - Acquisition Parameters  
 Date\_ 20130728  
 Time 14.14  
 INSTRUM spect  
 PROBHD 5 mm PATXI 1H/  
 PULPROG zg  
 ID 59998  
 SOLVENT CDC13  
 NS 32  
 DS 0  
 SWH 10000.000 Hz  
 FIDRES 0.166672 Hz  
 AQ 2.9999001 sec  
 RG 155.5  
 DW 50.000 usec  
 DE 10.00 usec  
 TE 296.2 K  
 D1 5.0000000 sec  
 TDO 1

----- CHANNEL f1 -----  
 SF01 500.130885 MHz  
 NUC1 1H  
 P1 8.00 usec  
 PLW1 12.19999981 W

F2 - Processing parameters  
 SI 65536  
 SF 500.1300138 MHz  
 WDW EM  
 SSB 0  
 LB 0.30 Hz  
 GB 0  
 PC 1.00

1.579  
1.564  
1.390  
1.358  
1.326  
1.188  
1.036  
1.016  
0.996

4.153  
4.122  
3.865  
3.858  
3.846  
3.740  
3.709

7.852  
7.150  
7.146  
7.143  
7.034  
7.030

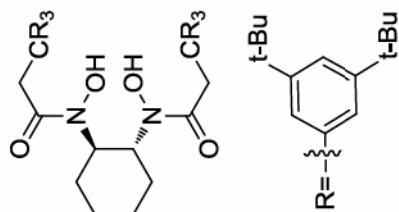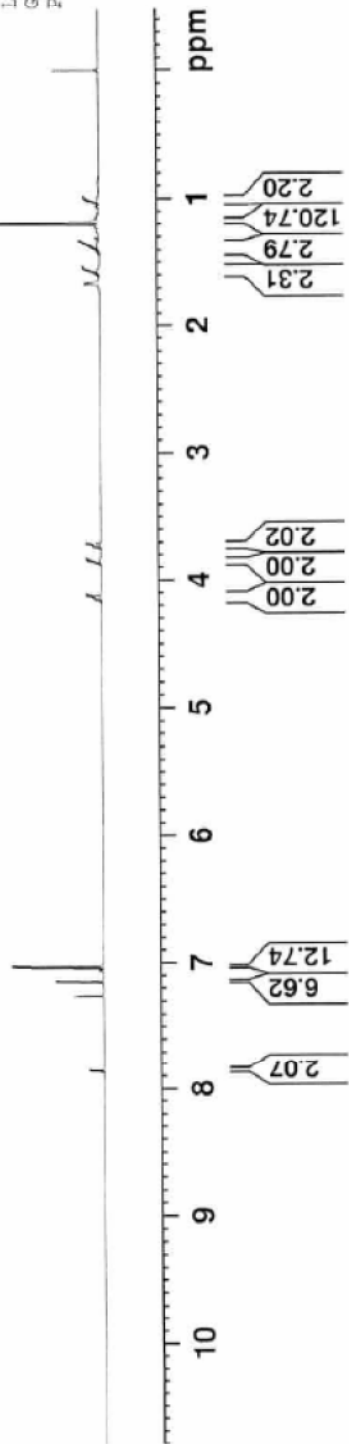

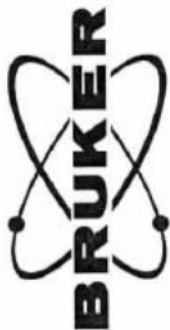

Current Data Parameters  
NAME cw328a-13C  
EXPNO 1  
PROCNO 1

F2 - Acquisition Parameters  
Date\_ 20130728  
Time 16.06  
INSTRUM spect  
PROBHD 5 mm QNP 1H/13  
PULPROG zgpg  
TD 142854  
SOLVENT CDC13  
NS 2048  
DS 0  
SWH 32679.738 Hz  
FIDRES 0.228763 Hz  
AQ 2.1857162 sec  
RG 32768  
DW 15.300 usec  
DE 7.50 usec  
TE 296.1 K  
D1 1.00000000 sec  
d11 0.03000000 sec  
TD0 1

==== CHANNEL f1 =====  
NUC1 13C  
P1 8.50 usec  
PL1 0.00 dB  
SFO1 125.7049802 MHz

==== CHANNEL f2 =====  
CPDPRG2 waltz16  
NUC2 1H  
PCPD2 90.00 usec  
PL2 1.00 dB  
PL12 21.00 dB  
SFO2 499.8734991 MHz

F2 - Processing parameters  
SI 65536  
SF 125.6923967 MHz  
WDW EM  
SSB 0  
LB 1.00 Hz  
GB 0  
PC 1.40

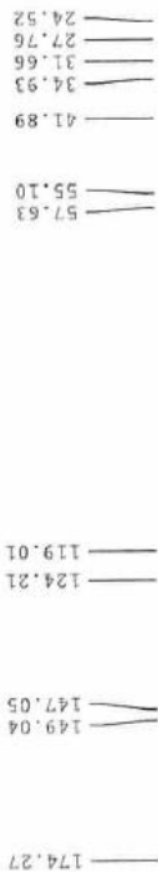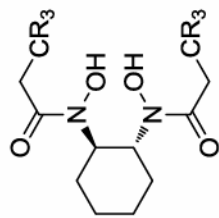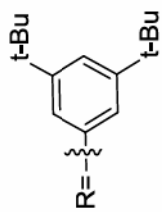

BHA-5

220 200 180 160 140 120 100 80 60 40 20 0 ppm

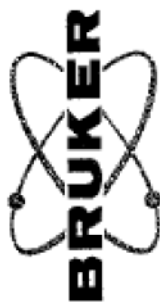

Current Data Parameters  
NAME cw378a  
EXPNO 1  
PROCNO 1

F2 - Acquisition Parameters  
Date\_ 20130802  
Time 14.08  
INSTRUM spect  
PROBHD 5 mm PAXI 1H/  
PULPROG zg  
TD 59998  
SOLVENT CDC13  
NS 8  
DS 0  
SMH 10000.000 Hz  
FIDRES 0.166672 Hz  
AQ 2.9999001 sec  
RG 11.29  
DW 50.000 usec  
DE 10.00 usec  
TE 295.0 K  
D1 5.00000000 sec  
TDO 1

CHANNEL f1  
SFO1 500.1330885 MHz  
NUC1 1H  
P1 8.00 usec  
PLW1 12.19999981 W

F2 - Processing parameters  
SI 65536  
SF 500.1300031 MHz  
WDW EM  
SSB 0  
LB 0.30 Hz  
GB 0  
PC 1.00

5.618  
5.607  
5.603  
5.600  
5.572  
2.027  
2.024  
2.017  
2.013  
2.003  
1.998  
1.987  
1.981  
1.367  
1.353  
1.338  
1.332  
1.327  
1.304  
1.292  
1.289  
1.278  
1.270  
1.265  
1.257  
1.250  
0.901  
0.888  
0.873

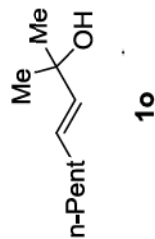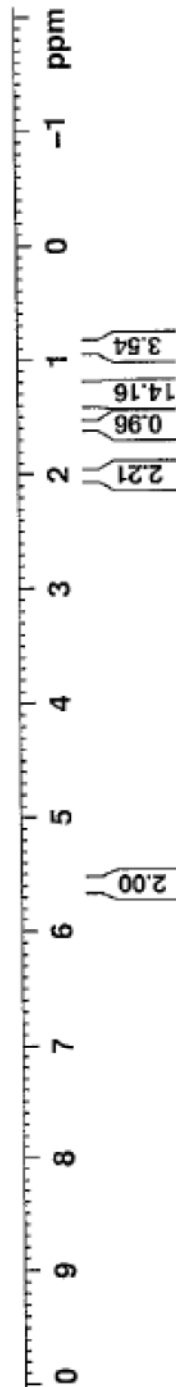

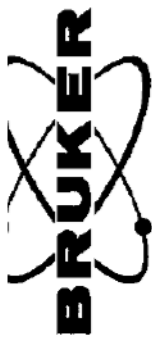

Current Data Parameters  
NAME cw378a-13C  
EXPNO 1  
PROCNO 1

F2 - Acquisition Parameters  
Date\_ 20130802  
Time 13.36  
INSTRUM spect  
PROBHD 5 mm QNP 1H/13  
PULPROG zgdc  
TD 142854  
SOLVENT CDCl3  
NS 280  
DS 0  
SWH 32679.738 Hz  
FIDRES 0.228763 Hz  
AQ 2.1857162 sec  
RG 32768  
DW 15.300 usec  
DE 7.50 usec  
TE 294.7 K  
D1 1.00000000 sec  
d11 0.03000000 sec  
TD0 1

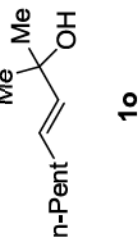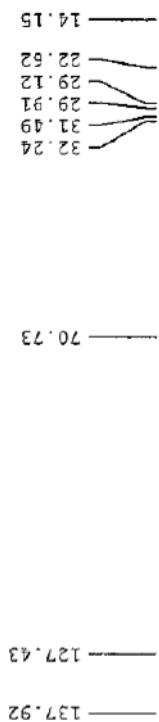

==== CHANNEL f1 =====  
NUC1 13C  
P1 8.50 usec  
PL1 0.00 dB  
SFO1 125.7049802 MHz

==== CHANNEL f2 =====  
CPDPRG2 waltz16  
NUC2 1H  
PCPD2 90.00 usec  
PL2 1.00 dB  
PL12 21.00 dB  
SFO2 499.8734991 MHz

F2 - Processing parameters  
SI 65536  
SF 125.6924009 MHz  
WDW EM  
SSB 0  
LB 1.00 Hz  
GB 0  
PC 1.40

220 200 180 160 140 120 100 80 60 40 20 0 ppm

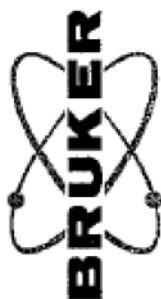

Current Data Parameters  
NAME cw458b  
EXPNO 1  
PROCNO 1

F2 - Acquisition Parameters  
Date\_ 20131002  
Time 16.09  
INSTRUM spect  
PROBHD 5 mm FATHI 1H/  
PULPROG zg  
TD 59998  
SOLVENT CDCl3  
NS 16  
DS 0  
SWH 10000.000 Hz  
FIDRES 0.166672 Hz  
AQ 2.9999001 sec  
RG 31.72  
DW 50.000 usec  
DE 10.00 usec  
TE 296.9 K  
D1 5.00000000 sec  
TDO 1

CHANNEL f1  
SF01 500.1330885 MHz  
NUC1 1H  
P1 8.00 usec  
PLW1 12.19999881 W

F2 - Processing parameters  
SI 65536  
SF 500.1300090 MHz  
WDW EM  
SSB 0  
LB 0.30 Hz  
GB 0  
PC 1.00

1.311  
1.540  
1.607  
1.662  
1.676  
2.013  
2.028  
2.043  
2.046  
2.059  
2.085  
2.098  
2.116  
2.133  
4.143  
4.157  
5.096  
5.099  
5.110  
5.112  
5.124  
5.126  
5.396  
5.399  
5.410  
5.412  
5.424  
5.426  
5.447  
5.449  
5.460  
5.463  
5.474  
5.476

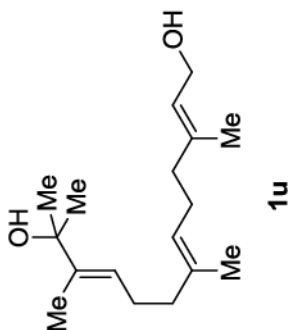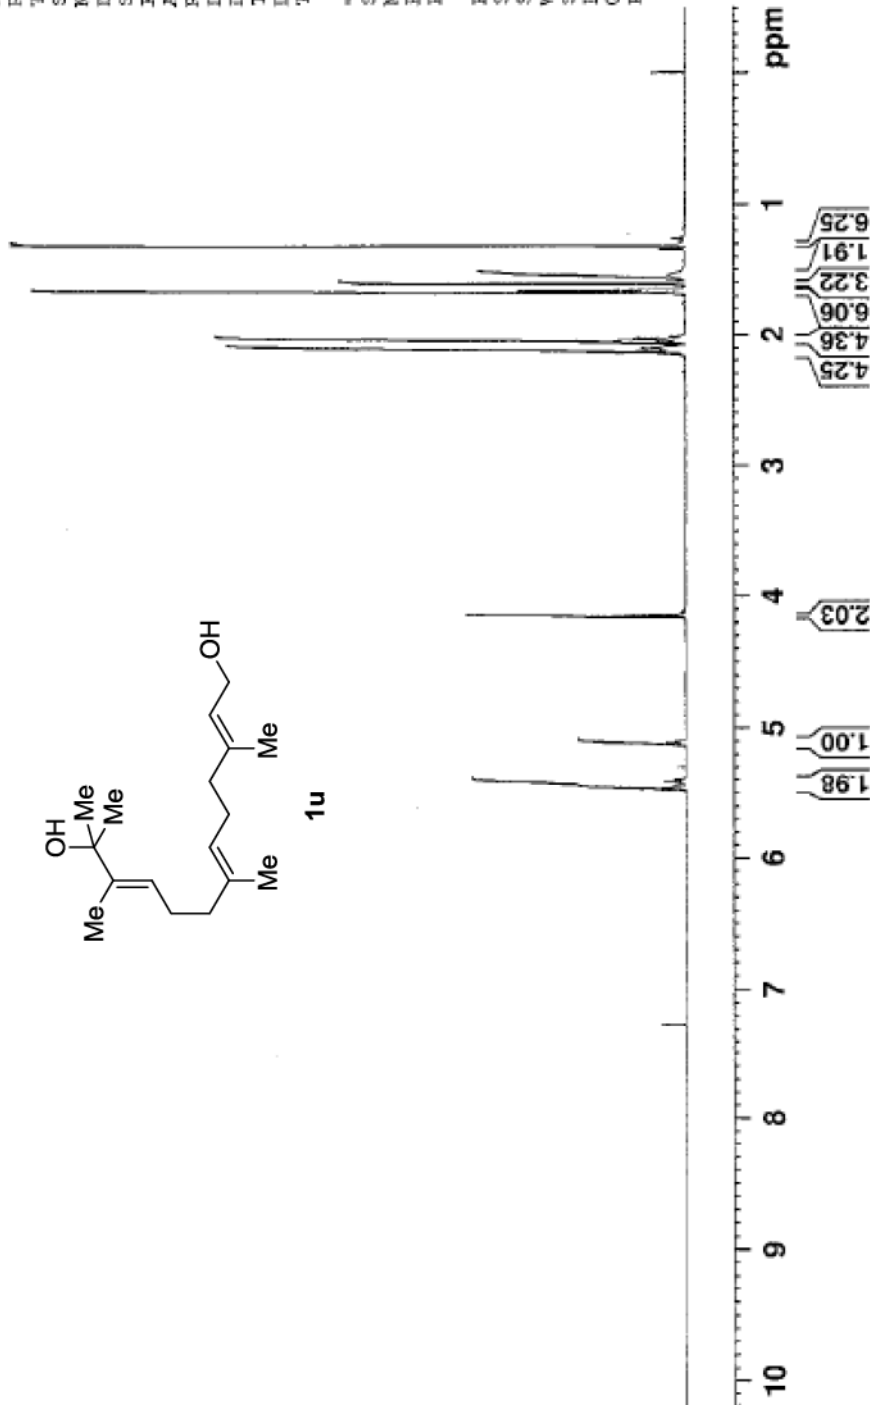

Current data parameters  
 NAME CW458B-13C  
 EXPNO 1  
 PROCNO 1

F2 - Acquisition Parameters  
 Date\_ 20131002  
 Time 18.50  
 INSTRUM spect  
 PROBHD 5 mm PAXI 1H/  
 PULPROG zgdc  
 TD 178368  
 SOLVENT CDCl3  
 NS 562  
 DS 0  
 SWH 32894.738 Hz  
 FIDRES 0.184214 Hz  
 AQ 2.7142336 sec  
 RG 196.79  
 DW 15.200 usec  
 DE 10.00 usec  
 TE 297.9 K  
 D1 1.00000000 sec  
 D11 0.03000000 sec  
 TDO 1

==== CHANNEL f1 =====  
 SFO1 125.7703648 MHz  
 NUC1 13C  
 P1 14.00 usec  
 PLW1 170.00000000 W

==== CHANNEL f2 =====  
 SFO2 500.1320005 MHz  
 NUC2 1H  
 CDPORG[2] waltz16  
 PCPD2 90.00 usec  
 PLW2 12.19999981 W  
 PLW12 0.20893000 W

F2 - Processing parameters  
 SI 131072  
 SF 125.757738 MHz  
 WDW EM  
 SSB 0  
 LB 1.00 Hz  
 GB 0  
 PC 1.40

121.89  
 123.69  
 129.19  
 135.20  
 139.50  
 141.34  
 73.63  
 59.50  
 39.56  
 39.46  
 29.04  
 26.44  
 26.27  
 16.38  
 16.13  
 12.87

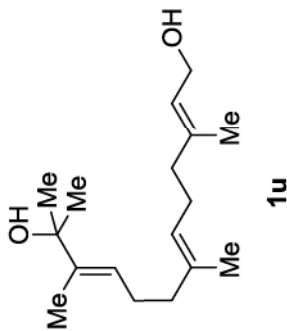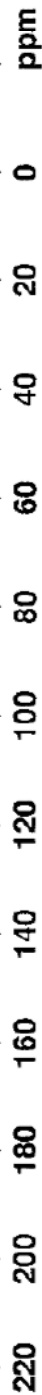

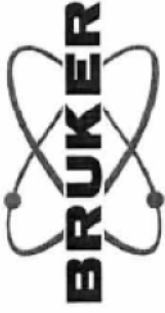

Current Data Parameters  
 NAME cw461b  
 EXPNO 1  
 PROCNO 1

F2 - Acquisition Parameters

Date\_ 20131021  
 Time 16.42  
 INSTRUM spect  
 PROBHD 5 mm FATXI 1H/  
 PULPROG zg  
 TD 59998  
 SOLVENT CDC13  
 NS 16  
 DS 0  
 SWH 10000.000 Hz  
 FIDRES 0.166672 Hz  
 AQ 2.9999001 sec  
 RG 155.5  
 DW 50.000 usec  
 DE 10.00 usec  
 TE 295.9 K  
 D1 5.00000000 sec  
 TD0 1

==== CHANNEL f1 =====  
 SFO1 500.1330685 MHz  
 NUC1 1H  
 P1 8.00 usec  
 PLW1 12.19999981 W

F2 - Processing parameters  
 SI 65536  
 SF 500.1300121 MHz  
 WDW EM  
 SSB 0  
 LB 0.30 Hz  
 GB 0  
 PC 1.00

9.386  
 6.480  
 6.477  
 6.465  
 6.463  
 6.451  
 6.448  
 5.355  
 5.353  
 5.341  
 5.338  
 5.327  
 5.324  
 5.160  
 5.158  
 5.147  
 5.144  
 5.133  
 5.130  
 4.594  
 4.580  
 2.476  
 2.461  
 2.447  
 2.432  
 2.185  
 2.170  
 2.155  
 2.143  
 2.127  
 2.114  
 2.069  
 2.055  
 1.748  
 1.746  
 1.705

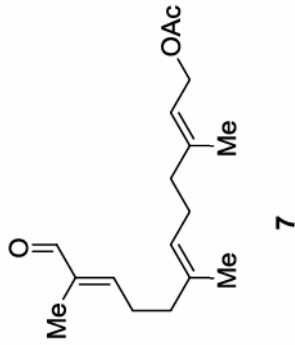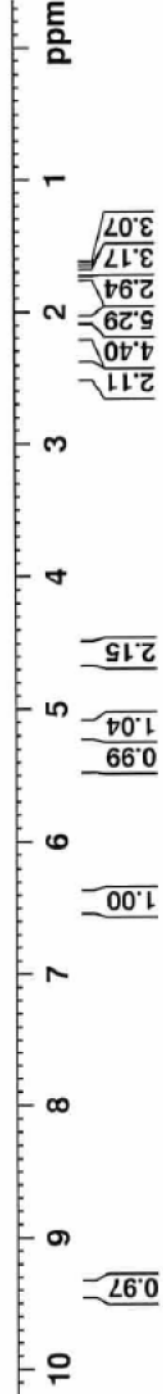

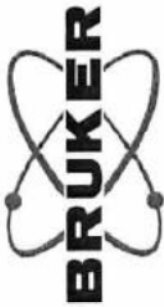

Current Data Parameters  
NAME cw481a-13C  
EXPNO 1  
PROCNO 1

F2 - Acquisition Parameters  
Date\_ 20131019  
Time 14.55  
INSTRUM spect  
PROBHD 5 mm PAXI 1H/  
PULPROG zgdc  
ID 178568  
SOLVENT CDC13  
NS 745  
DS 0  
SWH 32894.738 Hz  
FIDRES 0.164214 Hz  
AQ 2.7142336 sec  
RG 196.79  
DW 15.200 usec  
DE 10.00 usec  
TE 297.3 K  
D1 1.00000000 sec  
D11 0.03000000 sec  
TD0 1

==== CHANNEL f1 =====  
SFO1 125.7703648 MHz  
NUC1 13C  
P1 14.00 usec  
PLW1 170.0000000 W

==== CHANNEL f2 =====  
SFO2 500.1320005 MHz  
NUC2 1H  
CPDPRG[2] waltz16  
PCPD2 90.00 usec  
PLW2 12.19999981 W  
PLW12 0.20893000 W

F2 - Processing parameters  
SI 131072  
SF 125.7577700 MHz  
WDW EM  
SSB 0  
LB 1.00 Hz  
GB 0  
PC 1.40

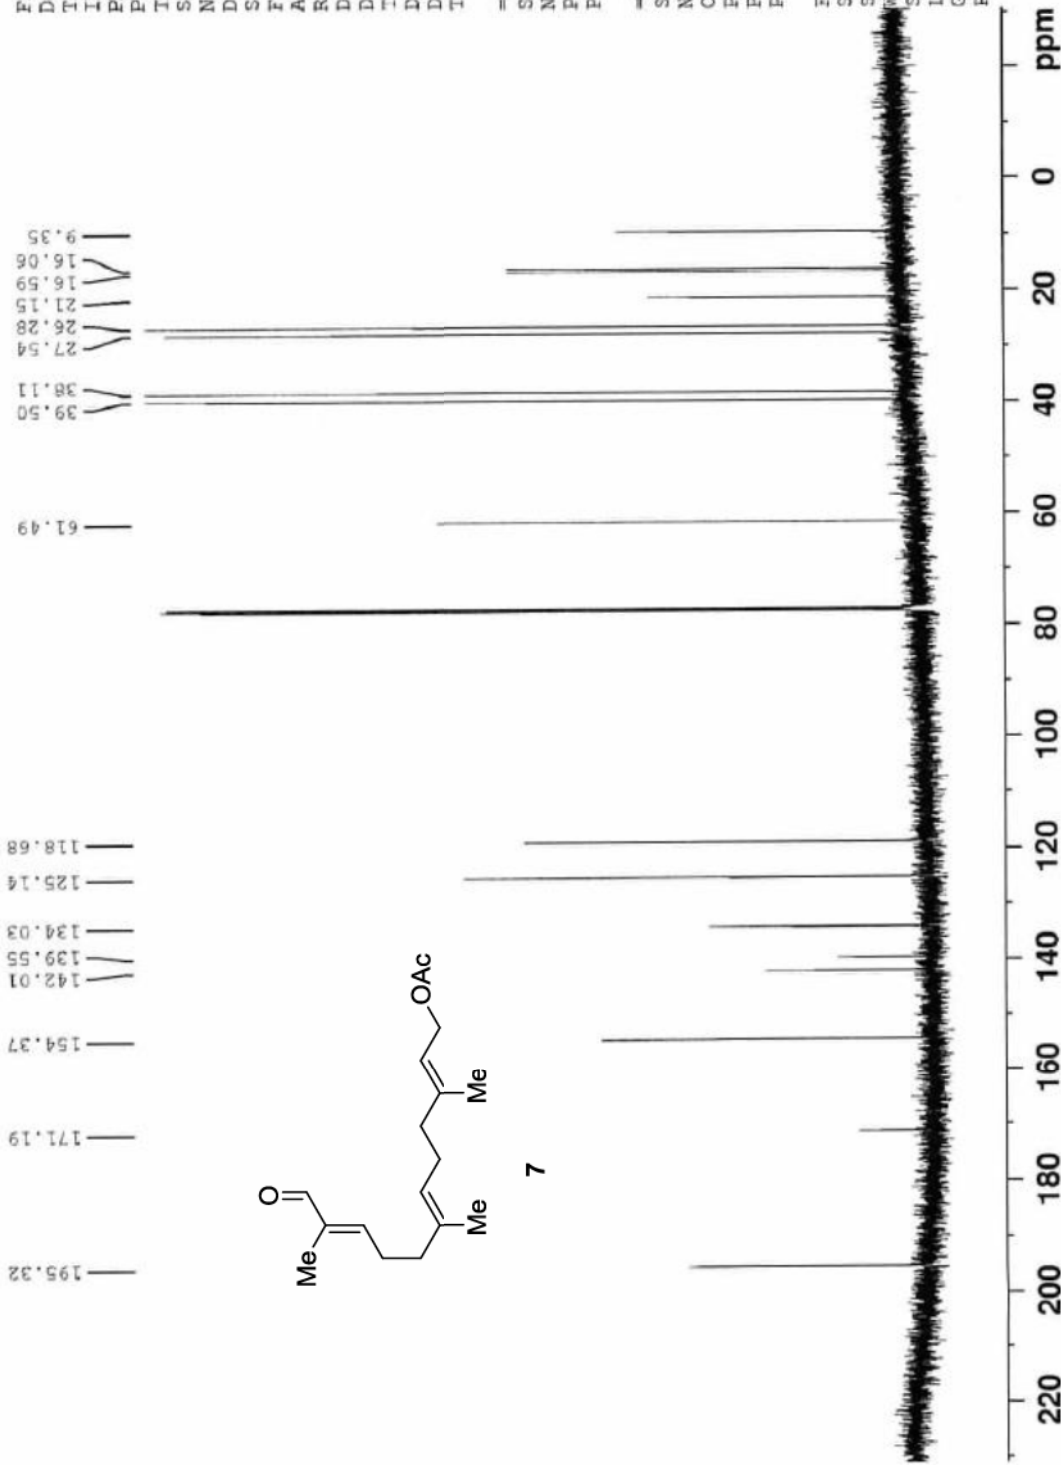

220 200 180 160 140 120 100 80 60 40 20 0 ppm



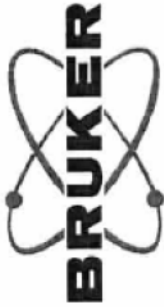

Current Data Parameters  
NAME cw482c  
EXPNO 1  
PROCNO 1

F2 - Acquisition Parameters  
Date\_ 20131021  
Time 18.49

INSTRUM spect  
PROBHD 5 mm PATXI IH/  
PULPROG zg  
TD 59998  
SOLVENT CDC13  
NS 16  
DS 0  
SWH 10000.000 Hz  
FIDRES 0.166672 Hz  
AQ 2.9999001 sec  
RG 126.24  
DW 50.000 usec  
DE 10.000 usec  
TE 296.1 K  
D1 5.00000000 sec  
TDO 1

===== CHANNEL f1 =====  
SF01 500.1330885 MHz  
NUC1 1H  
P1 8.00 usec  
PLW1 12.19999981 W

F2 - Processing parameters  
SI 65536  
SF 500.1300126 MHz  
WDW EM  
SSB 0  
LB 0.30 Hz  
GB 0  
PC 1.00

5.413  
5.411  
5.408  
5.344  
5.108  
5.106  
4.159  
4.146  
3.977  
3.963  
3.950  
2.130  
2.114  
2.100  
2.059  
2.043  
2.036  
2.021  
2.006  
1.679  
1.603  
1.593  
1.536  
1.534  
1.527  
1.524  
1.520  
1.514  
1.510  
1.506  
1.501  
1.493  
1.350  
1.348  
1.334  
1.320  
1.314  
1.310  
1.300  
1.296  
1.282  
0.910  
0.896  
0.881

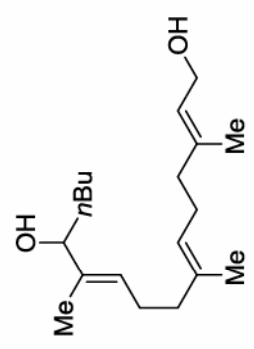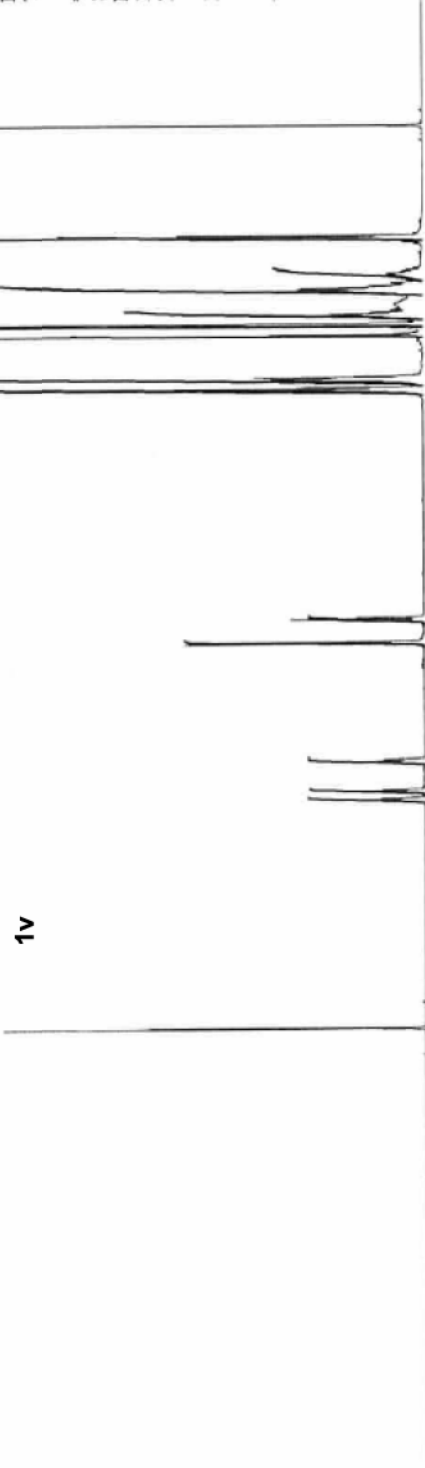

10 9 8 7 6 5 4 3 2 1 0 ppm

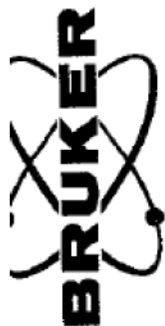

Current Data Parameters  
NAME cw482a-13C1  
EXPNO 1  
PROCNO 1

F2 - Acquisition Parameters  
Date\_ 20131019  
Time 19.04  
INSTRUM spect  
PROBHD 5 mm PAXI LH/  
PULPROG zgdc  
TD 178568  
SOLVENT CDC13  
NS 545  
DS 0  
SWH 32894.738 Hz  
FIDRES 0.184214 Hz  
AQ 2.7142336 sec  
RG 196.79  
DW 15.200 usec  
DE 10.00 usec  
TE 297.2 K  
D1 1.00000000 sec  
D11 0.03000000 sec  
TDO 1

CHANNEL f1  
SFO1 125.7703648 MHz  
NUC1 13C  
P1 14.00 usec  
PLW1 170.00000000 W

CHANNEL f2  
SFO2 500.1320005 MHz  
NUC2 1H  
CPDPRG[2] waltz16  
PCPD2 90.00 usec  
PLW2 12.19999981 W  
PLW12 0.20893000 W

F2 - Processing parameters  
SI 131072  
SF 125.7577711 MHz  
WDW EM  
SSB 0  
LB 1.00 Hz  
GB 0  
PC 1.40

11.97  
14.18  
16.11  
16.39  
22.77  
26.09  
26.32  
26.32  
28.17  
34.74  
39.39  
39.59

59.56  
78.12

123.68  
124.26  
126.32  
135.10  
137.46  
139.66

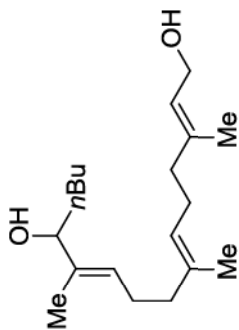

1v

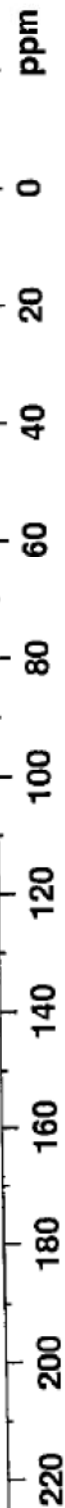

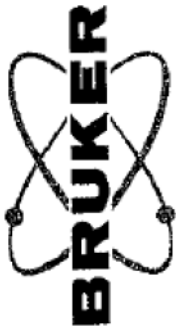

Current Data Parameters  
NAME cw387a  
EXPNO 1  
PROCNO 1

F2 - Acquisition Parameters  
Date\_ 20130712  
Time 16.45  
INSTRUM spect  
PROBHD 5 mm PATXI 1H/  
PULPROG zg  
TD 59998  
SOLVENT CDCl3  
NS 16  
DS 0  
SWH 10000.000 Hz  
FIDRES 0.166672 Hz  
AQ 2.9999001 sec  
RG 196.79  
DW 50.000 usec  
DE 10.00 usec  
TE 295.0 K  
D1 5.00000000 sec  
TDO 1

CHANNEL f1  
SF01 500.130885 MHz  
NUC1 1H  
P1 8.00 usec  
PLW1 12.19999981 W  
F2 - Processing parameters  
SI 65536  
SF 500.1300127 MHz  
WDW EM  
SSB 0  
LB 0.30 Hz  
GB 0  
PC 1.00

1.292  
1.295  
1.299  
1.301  
1.307  
1.314  
1.326  
1.332  
1.342  
1.357  
1.371  
1.386  
1.400  
1.503  
2.012  
2.025  
2.039  
2.054  
2.151  
2.165  
2.448  
5.462  
5.464  
5.476  
5.478  
5.492  
5.503  
5.515  
5.528  
5.546

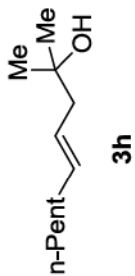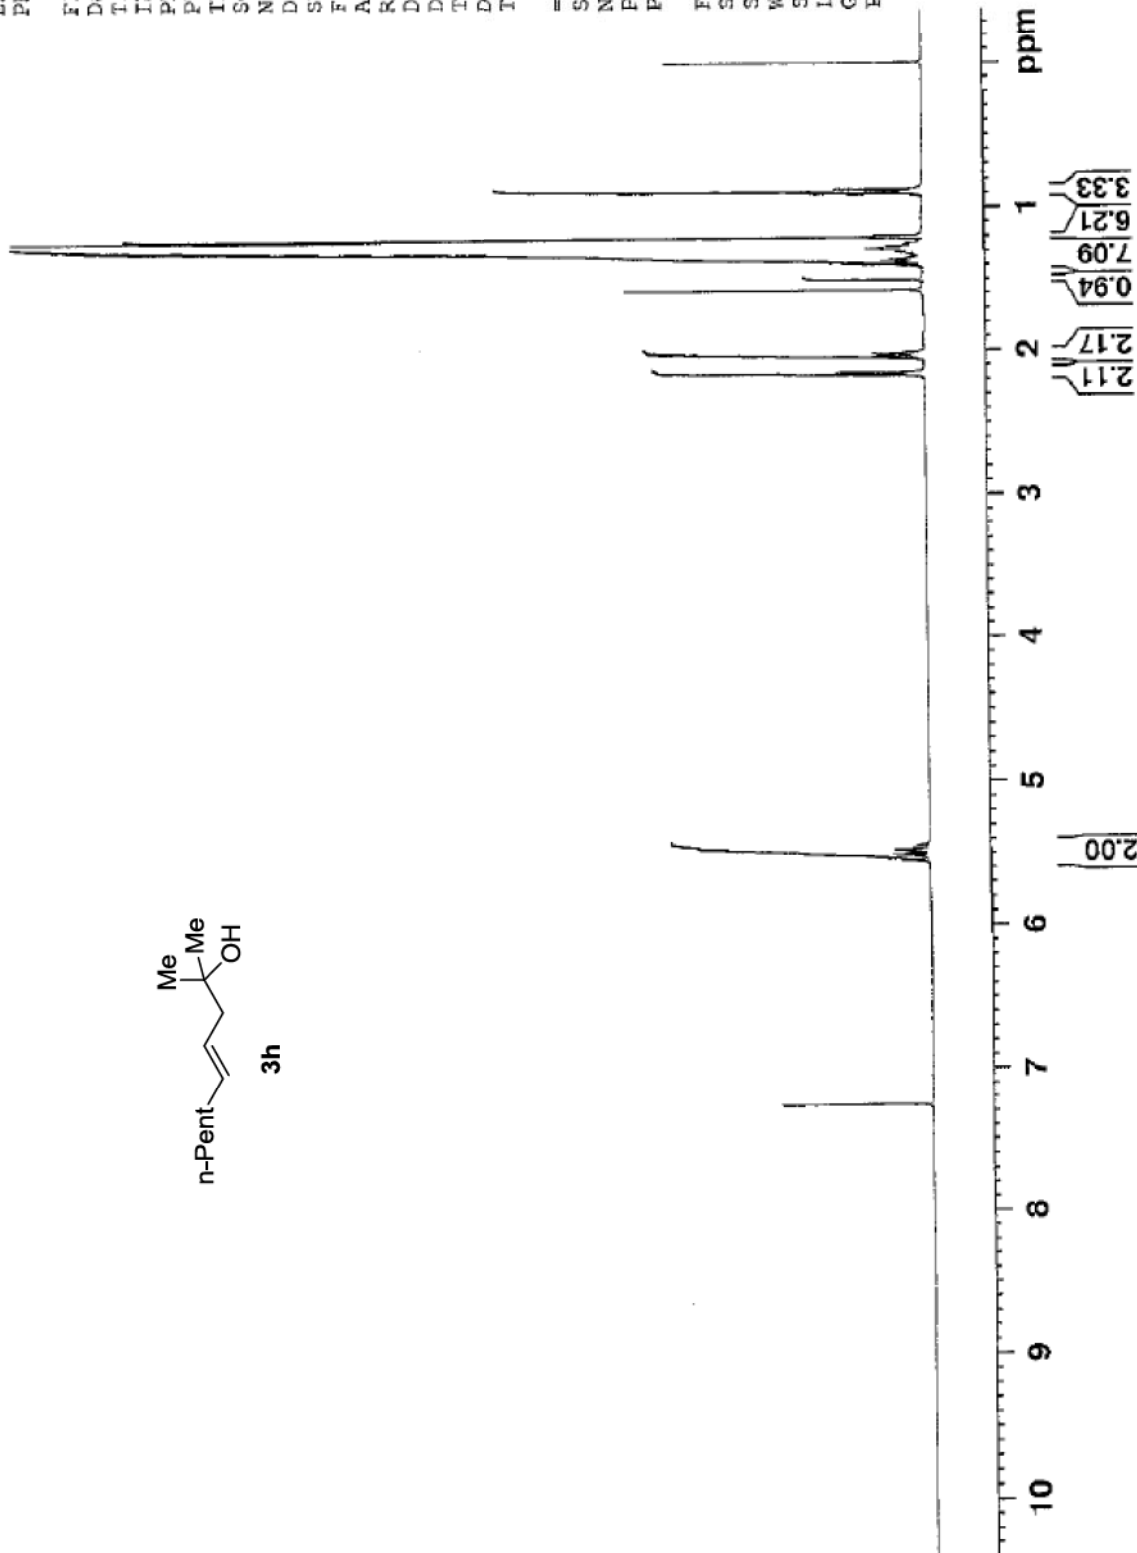

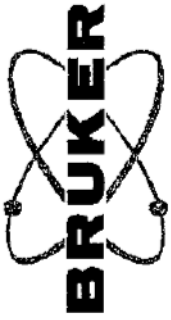

Current Data Parameters  
NAME CW387a-13C  
EXPNO 1  
PROCNO 1

F2 - Acquisition Parameters  
Date\_ 20130802  
Time 14.30  
INSTRUM spect  
PROBHD 5 mm PAIXI 1H/  
PULPROG zgdc  
TD 178568  
SOLVENT CDCl3  
NS 272  
DS 0  
SWH 32894.738 Hz  
FIDRES 0.184214 Hz  
AQ 2.7142336 sec  
RG 196.79  
DW 15.200 usec  
DE 10.00 usec  
TE 296.1 K  
D1 1.0000000 sec  
D11 0.0300000 sec  
ID0 1

==== CHANNEL f1 =====  
SFO1 125.7703648 MHz  
NUC1 13C  
P1 14.00 usec  
PLW1 170.0000000 W

==== CHANNEL f2 =====  
SFO2 500.1320005 MHz  
NUC2 1H  
CPDPRG[2] waltz16  
PCPD2 90.00 usec  
PLW2 12.1999981 W  
PLW12 0.20893000 W

F2 - Processing parameters  
SI 131072  
SF 125.7577692 MHz  
WDW EM  
SSB 0  
LB 1.00 Hz  
GB 0  
PC 1.40

135.53  
125.29  
70.55  
47.09  
32.81  
31.55  
29.31  
29.17  
22.65  
14.19

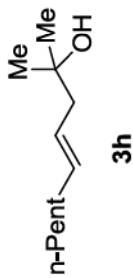

220 200 180 160 140 120 100 80 60 40 20 0 ppm

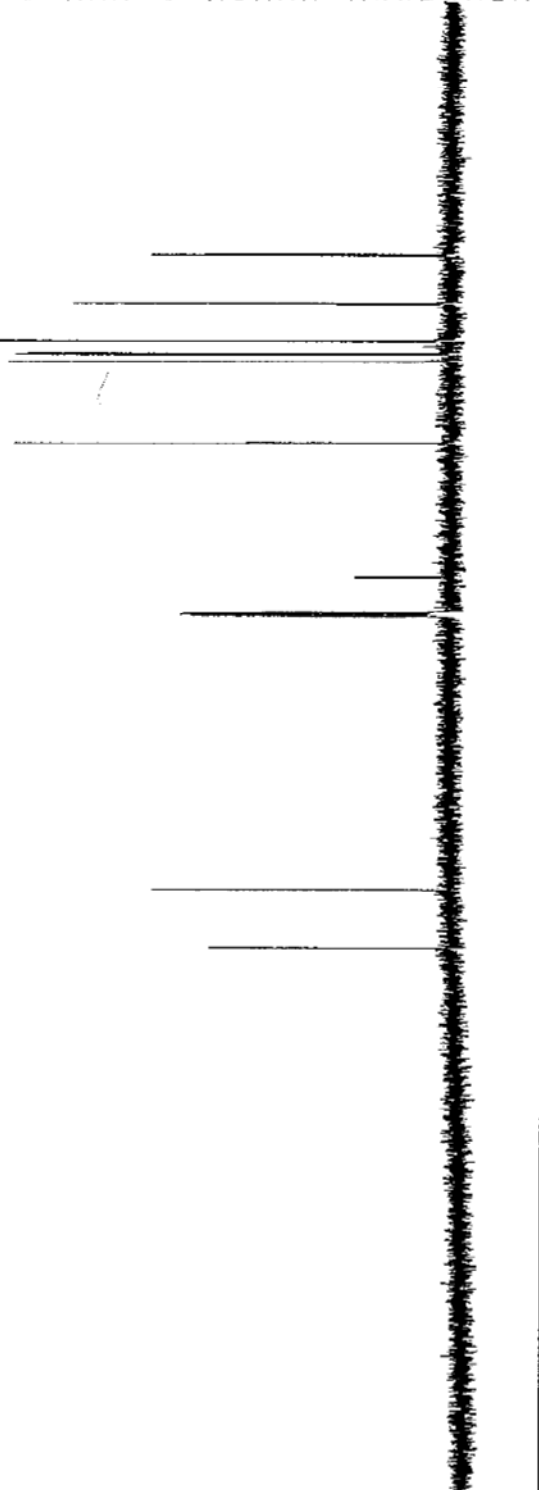

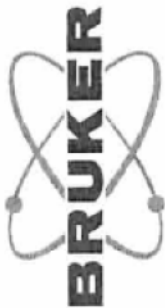

Current Data Parameters  
NAME cw464a  
EXPNO 1  
PROCNO 1

F2 - Acquisition Parameters  
Date\_ 20131008  
Time 11.28  
INSTRUM spect  
PROBHD 5 mm PAIXI 1H/  
PULPROG zg  
TD 59998  
SOLVENT CDCl3  
NS 8  
DS 0  
SWH 10000.000 Hz  
FIDRES 0.166672 Hz  
AQ 2.9999001 sec  
RG 196.79  
DW 50.000 usec  
DE 10.00 usec  
TE 296.5 K  
DI 5.00000000 sec  
TD0 1

==== CHANNEL f1 =====  
\$F01 500.1330885 MHz  
NUC1 1H  
P1 8.00 usec  
PLW1 12.19999981 W  
  
F2 - Processing parameters  
SI 65536  
SF 500.1300124 MHz  
WDW EM  
SSB 0 0.30 Hz  
LB 0  
GB 0  
PC 1.00

3.634  
3.618  
3.601  
2.369  
2.353  
2.337  
1.930  
1.918  
1.905  
1.904  
1.636  
1.584  
1.577  
1.572  
1.565  
1.559  
1.547  
1.431  
1.426  
1.419  
1.414

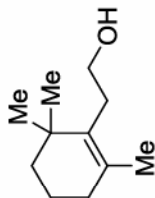

3g

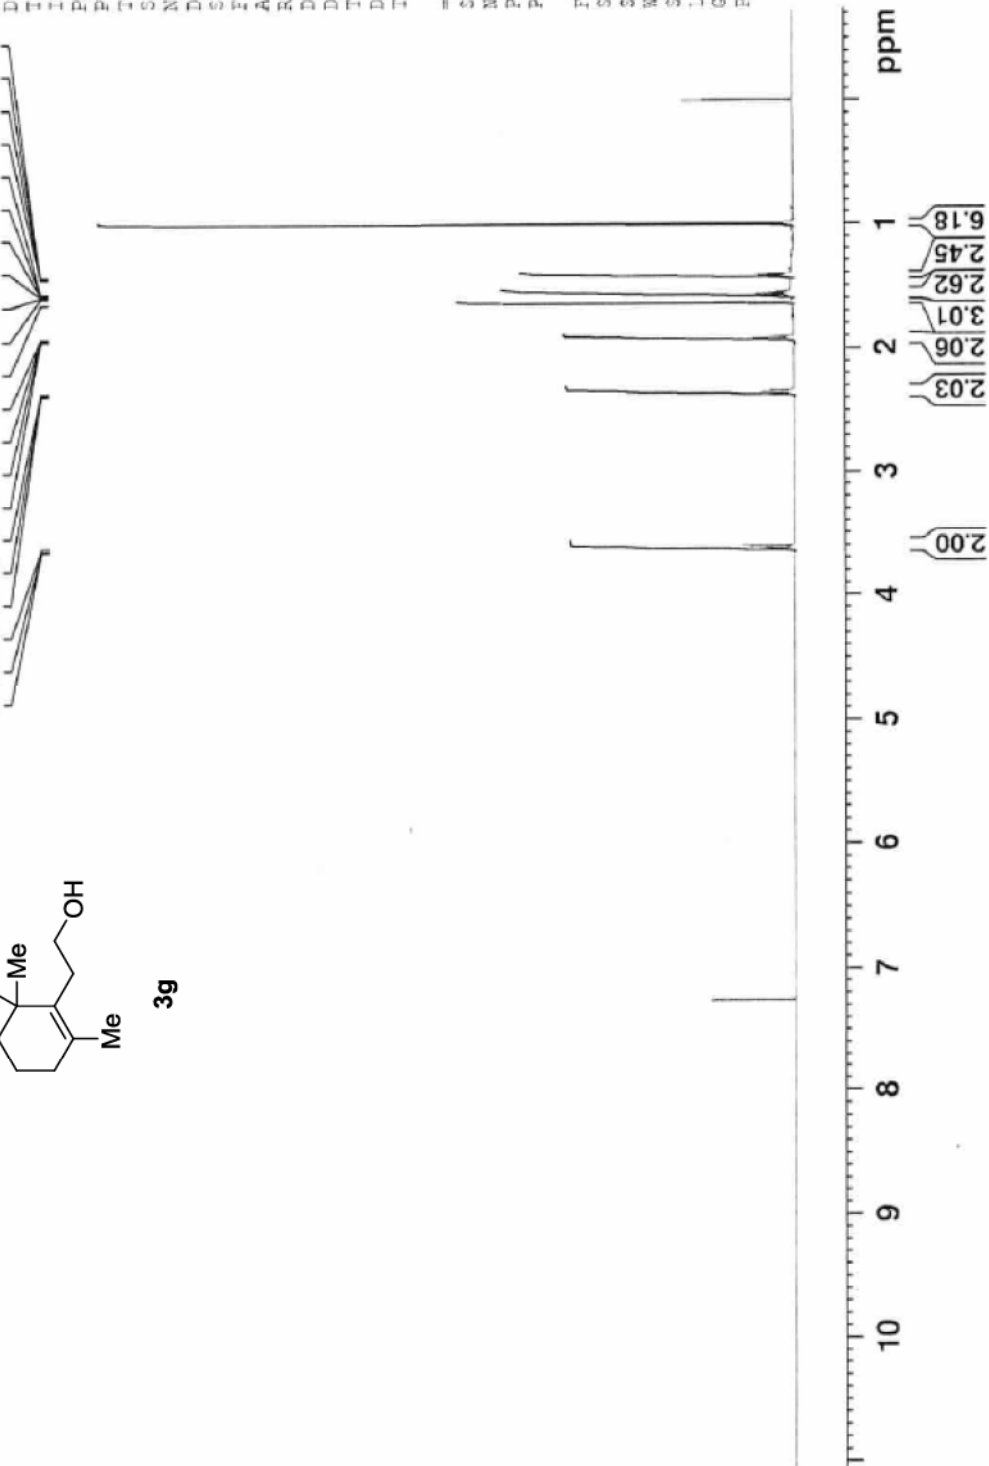

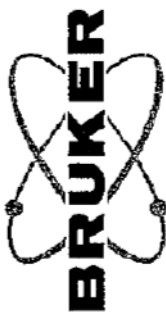

Current Data Parameters  
NAME Cw464a-13C  
EXPNO 1  
PROCNO 1

F2 - Acquisition Parameters  
Date\_ 20131012  
Time 18.14  
INSTRUM spect  
PROBHD 5 mm PATXI 1H/  
PULPROG zgpg  
TD 178568  
SOLVENT CDC13  
NS 490  
DS 0  
SWH 32894.738 Hz  
FIDRES 0.184214 Hz  
AQ 2.7142336 sec  
RG 196.79  
DW 15.200 usec  
DE 10.00 usec  
TE 295.5 K  
D1 1.00000000 sec  
D11 0.03000000 sec  
TD0 1

==== CHANNEL f1 =====  
SFO1 125.7703648 MHz  
NUC1 13C  
P1 14.00 usec  
PLW1 170.00000000 W

==== CHANNEL f2 =====  
SFO2 500.1320005 MHz  
NUC2 1H  
CPDPRG[2] waltz16  
PCPD2 90.00 usec  
PLW2 12.19999981 W  
PLW12 0.20893000 W

F2 - Processing parameters  
SI 131072  
SF 125.757721 MHz  
WDW EM  
SSB 0  
LB 0  
GB 0  
PC 1.40

19.56  
20.30  
28.71  
32.08  
32.94  
34.85  
39.85

62.72

129.77  
132.94

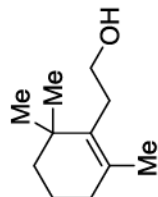

220 200 180 160 140 120 100 80 60 40 20 0 ppm

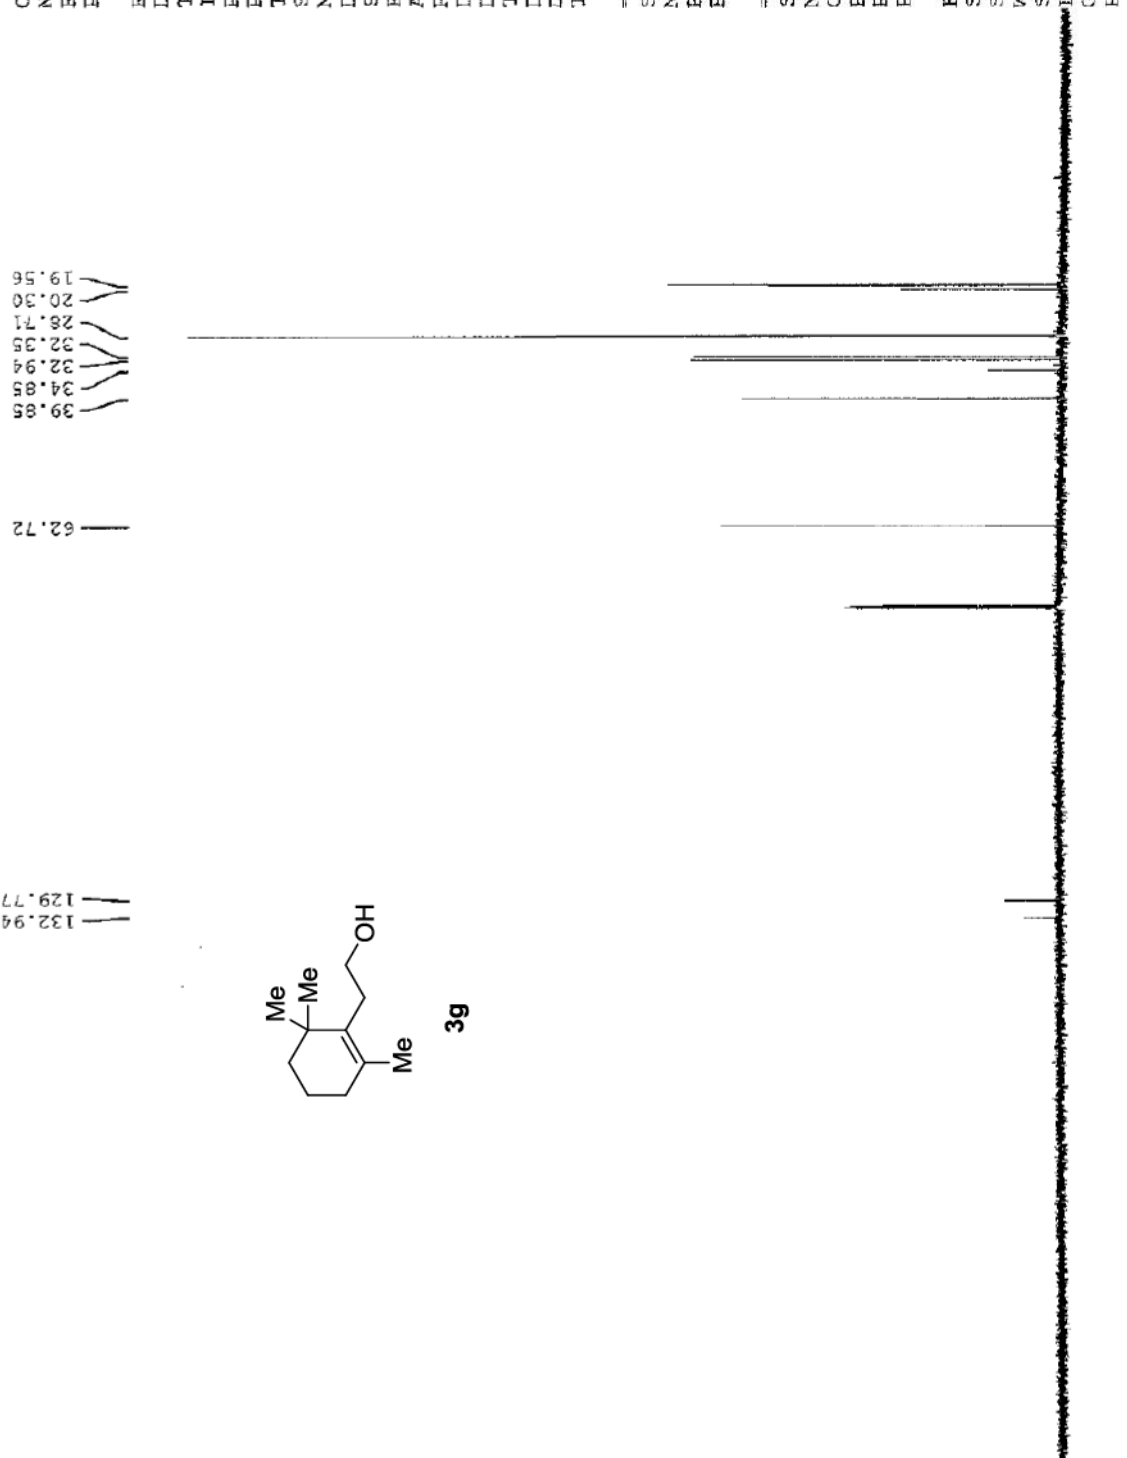

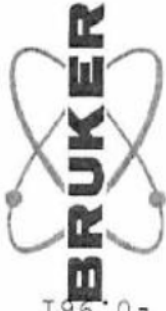

3.870  
3.862  
3.845  
3.838  
3.674  
3.660  
3.650  
3.635  
3.183  
3.175  
3.169  
3.167  
3.161  
3.153  
3.053  
3.044  
3.039  
1.566  
1.564  
1.561  
1.558  
1.549  
1.544  
1.540  
1.536  
1.531  
1.525  
1.521  
1.517  
1.509  
1.501  
1.487  
1.482  
1.470  
1.465  
1.458  
1.456  
1.451  
1.445  
0.990  
0.984  
0.979  
0.975  
0.961

Current Data Parameters  
NAME cw345b  
EXPNO 1  
PROCNO 1

F2 - Acquisition Parameters  
Date\_ 20130615  
Time 18.14  
INSIRUM Spect  
PROBHD 5 mm PATXI 1H/  
PULPROG zg  
TD 5998  
SOLVENT CDCl3  
NS 8  
DS 0  
SWH 10000.000 Hz  
FIDRES 0.166672 Hz  
AQ 2.9999001 sec  
RG 12.63  
DW 50.000 usec  
DE 10.00 usec  
TE 294.7 K  
D1 7.0000000 sec  
TD0 1

===== CHANNEL f1 =====  
SF01 500.1330685 MHz  
NUC1 1H  
P1 8.00 usec  
PLW1 12.19999981 W

F2 - Processing parameters  
SI 65536  
SF 500.1299921 MHz  
WDW EM  
SSB 0  
LB 0.30 Hz  
GB 0  
PC 1.00

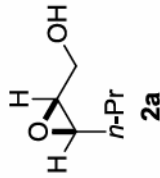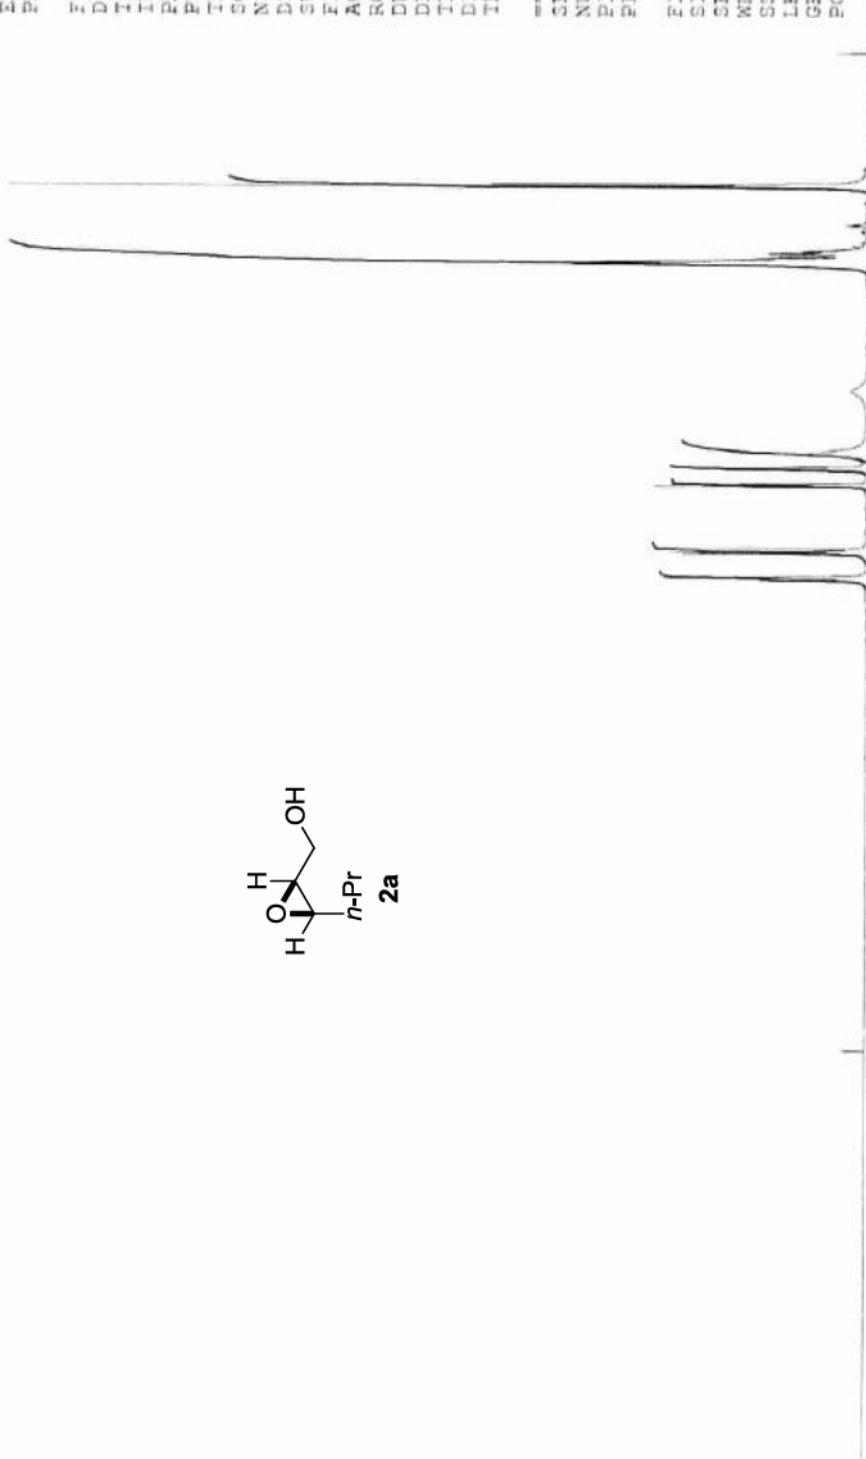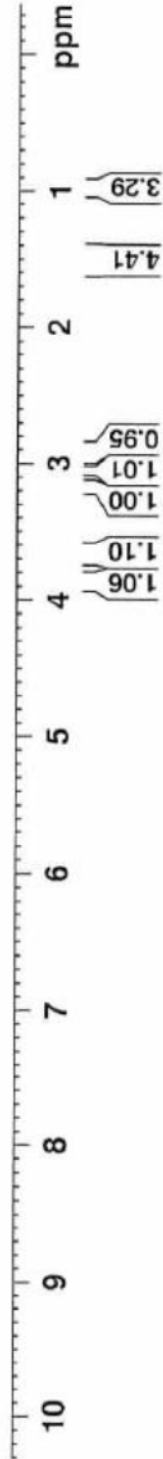

Current Data Parameters  
 NAME cw345a-13C  
 EXPNO 1  
 PROCNO 1

F2 - Acquisition Parameters  
 Date\_ 20130615  
 Time 17.31  
 INSTRUM spect  
 PROBD 5 mm PAXI 1H/  
 PULPROG zgdc  
 ID 178568  
 SOLVENT CDC13  
 NS 287  
 DS 0  
 SWH 32894.738 Hz  
 FIDRES 0.184214 Hz  
 AQ 2.7142336 sec  
 RG 196.79  
 DW 15.200 usec  
 DE 10.00 usec  
 TE 296.0 K  
 D1 3.00000000 sec  
 D11 0.03000000 sec  
 TD0 1

===== CHANNEL f1 =====  
 SFO1 125.7703648 MHz  
 NUC1 13C  
 P1 14.00 usec  
 PLW1 170.00000000 W

===== CHANNEL f2 =====  
 SFO2 500.1320005 MHz  
 NUC2 1H  
 CPDPRG[2] waltz16  
 PCPD2 90.00 usec  
 PLW2 12.19999981 W  
 PLW12 0.20893000 W

F2 - Processing parameters  
 SI 131072  
 SF 125.7577751 MHz  
 WDW EM  
 SSB 0  
 LB 0  
 GB 0  
 PC 1.40

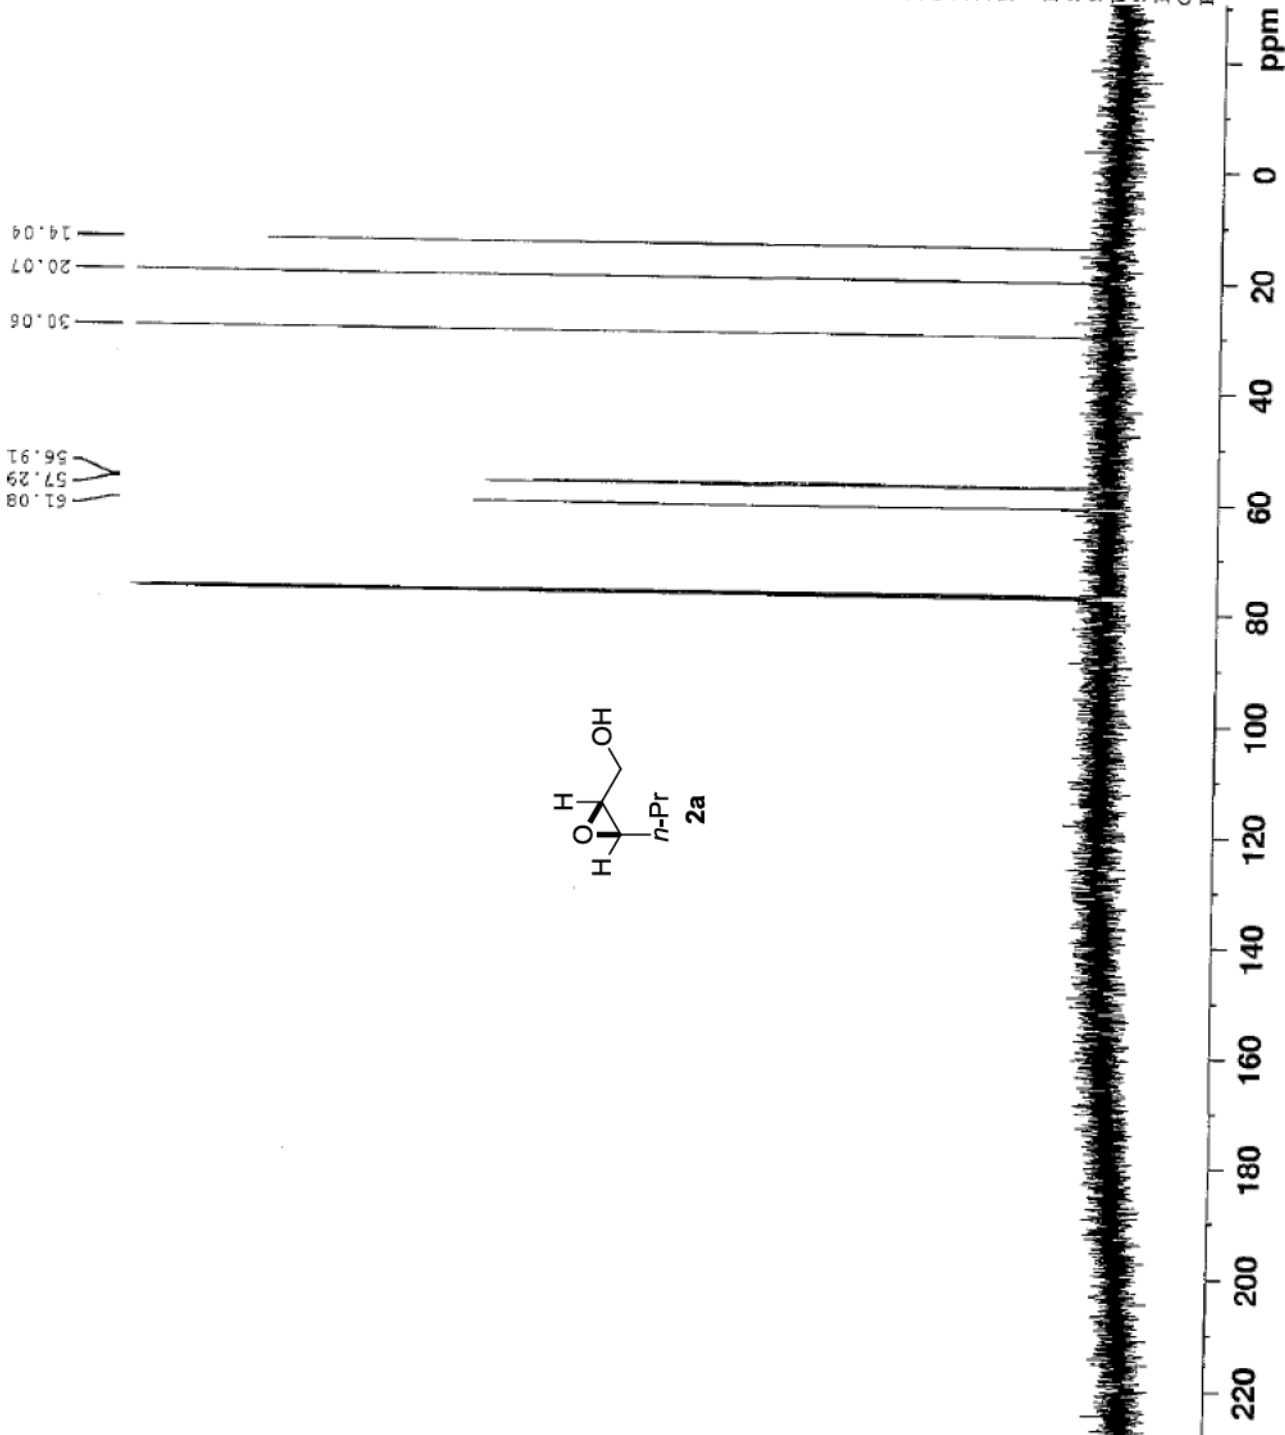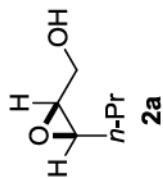



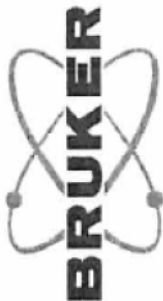

3.848  
3.688  
3.674  
3.177  
3.169  
3.163  
3.161  
3.155  
3.147  
3.054  
3.043  
3.040  
3.034  
3.031  
3.029  
3.020  
2.078  
1.582  
1.570  
1.565  
1.556  
1.553  
1.548  
1.540  
1.537  
1.526  
1.521  
1.516  
1.514  
1.510  
1.503  
1.489  
1.374  
1.360  
1.347  
1.334  
1.318  
1.305  
1.298  
1.294  
1.291  
1.277  
1.269  
0.889

Current Data Parameters  
NAME cw351a  
EXPNO 1  
PROCNO 1

F2 - Acquisition Parameters  
Date\_ 20130615  
Time 16.22  
INSTRUM spect  
PROBHD 5 mm PATXI 1H/  
PULPROG zg  
TD 59998  
SOLVENT CDCl3  
NS 16  
DS 0  
SWH 10000.000 Hz  
FIDRES 0.166672 Hz  
AQ 2.9999001 sec  
RG 26.8  
DW 50.000 usec  
DE 10.00 usec  
TE 294.7 K  
D1 5.0000000 sec  
TD0 1

===== CHANNEL f1 =====  
SFO1 500.130585 MHz  
NUC1 1H  
P1 8.00 usec  
PL1 12.19999981 W

F2 - Processing parameters  
SI 65536  
SF 500.1300069 MHz  
WDW EM  
SSB 0  
LB 0.30 Hz  
GB 0  
PC 1.00

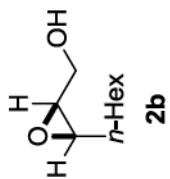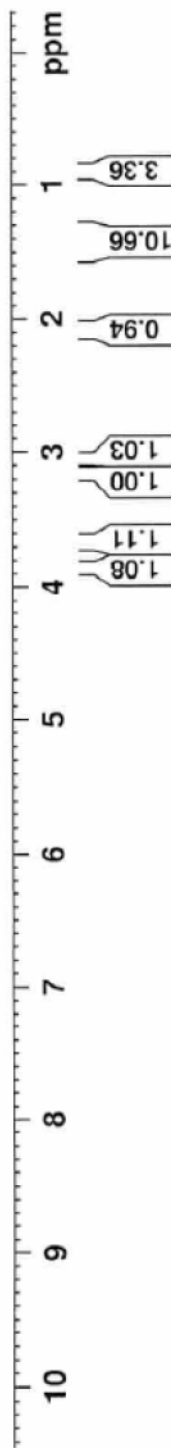

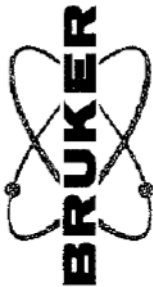

Current Data Parameters  
NAME GW351a-13C  
EXFNO 1  
PROCNO 1

F2 - Acquisition Parameters  
Date\_ 20130615  
Time 16.49  
INSTRUM spect  
PROBHD 5 mm PAXI LH/  
PULPROG zgdc  
TD 178568  
SOLVENT CDC13  
NS 211  
DS 0  
SWH 32894.738 Hz  
FIDRES 0.184214 Hz  
AQ 2.7142336 sec  
RG 196.79  
DW 15.200 usec  
DE 10.00 usec  
TE 295.9 K  
D1 3.00000000 sec  
D11 0.03000000 sec  
TDO 1

CHANNEL f1  
SF01 125.7703648 MHz  
NUC1 13C  
P1 14.00 usec  
PLW1 170.0000000 W

CHANNEL f2  
SF02 500.1320005 MHz  
NUC2 1H  
CPDPRG|2 waltz16  
PCPD2 90.00 usec  
PLW2 12.19989981 W  
PLW12 0.20893000 W

F2 - Processing parameters  
SI 131072  
SF 125.7577254 MHz  
WDW EM  
SSB 0  
LB 1.00 Hz  
GB 0  
PC 1.40

81.06  
57.48  
57.03  
31.81  
29.19  
28.09  
26.72  
22.66  
14.16

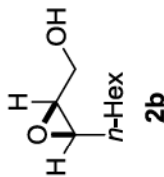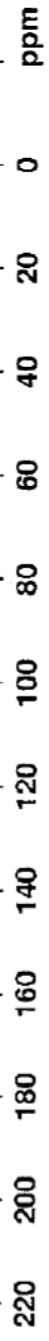



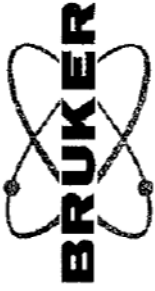

Current Data Parameters  
NAME cn350a-13C  
EXPNO 1  
PROCNO 1

F2 - Acquisition Parameters  
Date\_ 20130615  
Time 18.07  
INSTRUM spect  
PROBHD 5 mm PAIXI 1H/  
PULPROG zgdc  
TD 178568  
SOLVENT CDC13  
NS 245  
DS 0  
SWH 32894.738 Hz  
FIDRES 0.184214 Hz  
AQ 2.7142336 sec  
RG 196.79  
DW 15.200 usec  
DE 10.00 usec  
TE 295.9 K  
D1 3.0000000 sec  
D11 0.0300000 sec  
TD0 1

CHANNEL f1  
SFO1 125.7703648 MHz  
NUC1 13C  
P1 14.00 usec  
PLW1 170.0000000 W

CHANNEL f2  
SFO2 500.1320005 MHz  
NUC2 1H  
CPDPRG2 waltz16  
PCPD2 90.00 usec  
PLW2 12.19999981 W  
PLW12 0.20893000 W

F2 - Processing parameters  
SI 131072  
SF 125.7577723 MHz  
WDW EM  
SSB 0  
LB 1.00 Hz  
GB 0  
PC 1.40

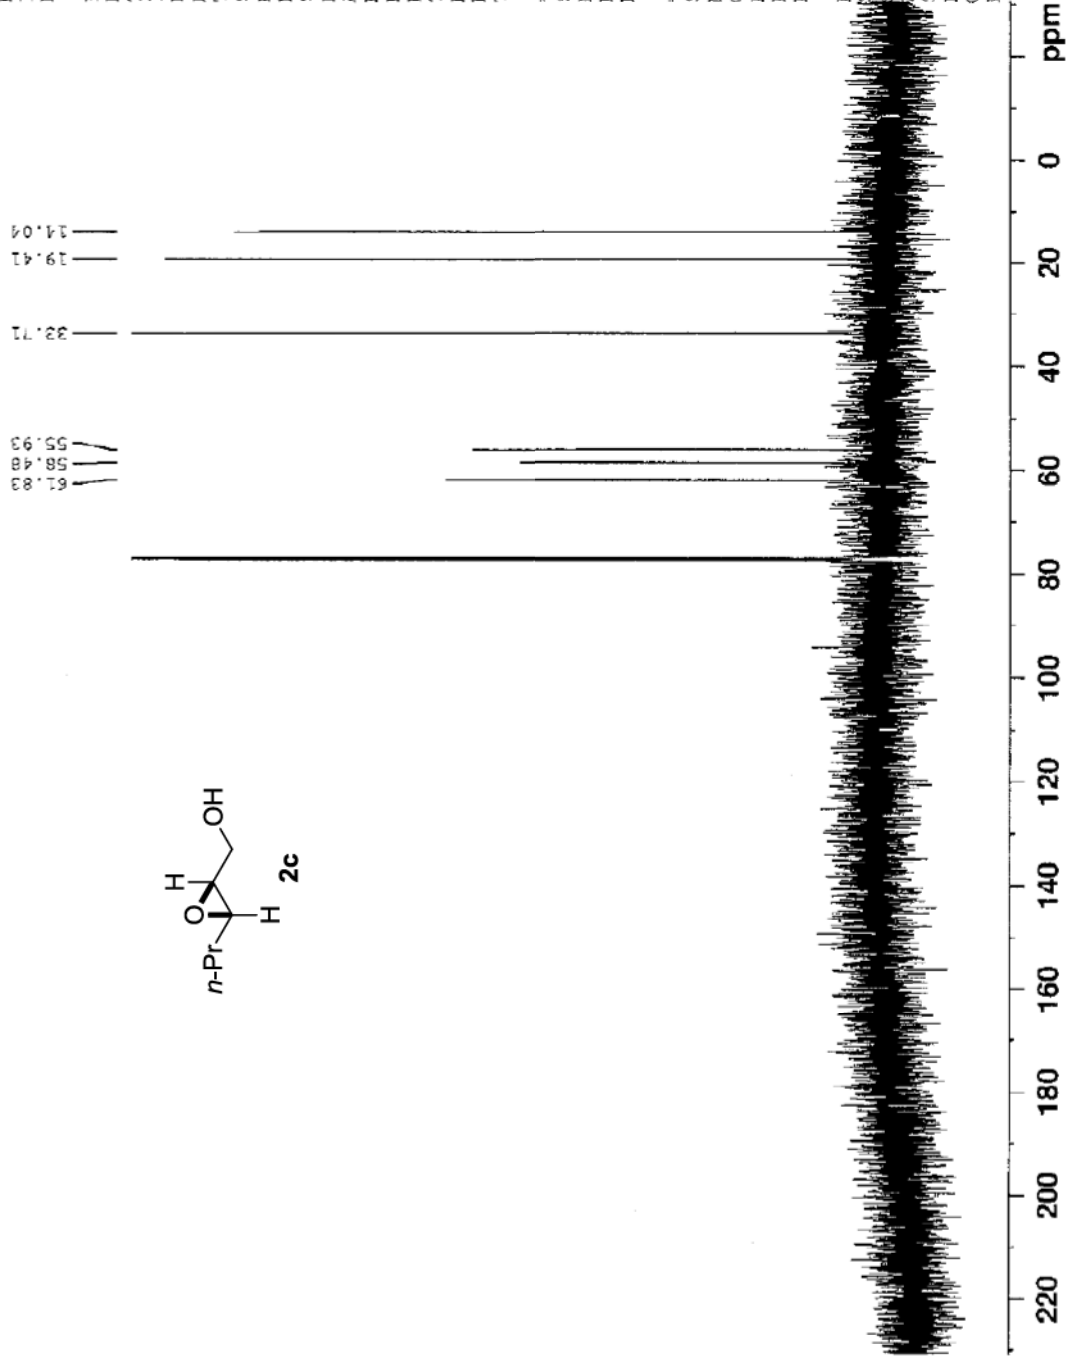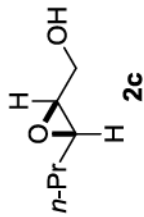

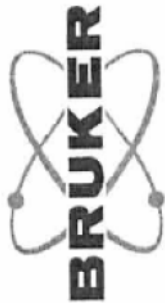

Current Data Parameters  
NAME cw352c  
EXPNO 1  
PROCNO 1

F2 - Acquisition Parameters  
Date\_ 20130616  
Time 19.02  
-NSIRUM spect  
PROBHD 5 mm PAWI 1H/  
PULPROG zg  
TD 59998  
SOLVENT CDCl3  
NS 16  
DS 0  
SWH 1000.000 Hz  
FIDRES 0.166672 Hz  
AQ 2.9999001 sec  
RG 33.38  
DW 50.000 usec  
DE 10.00 usec  
TE 294.7 K  
D1 5.00000000 sec  
TD0 1

----- CHANNEL f1 -----  
SFO1 500.130085 MHz  
NUC1 1H  
P1 8.00 usec  
PLW1 12.19999981 W

F2 - Processing parameters  
SI 6536  
SF 500.1300036 MHz  
WDW EM  
SSB 0  
LB 0.30 Hz  
GB 0  
PC 1.00

3.934  
3.929  
3.923  
3.919  
3.909  
3.904  
3.898  
3.894  
3.618  
3.608  
3.606  
3.595  
3.583  
3.581  
3.571  
3.054  
3.049  
3.045  
3.040  
3.035  
2.765  
2.760  
2.231  
2.219  
0.936

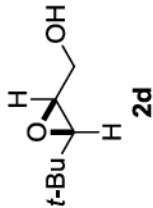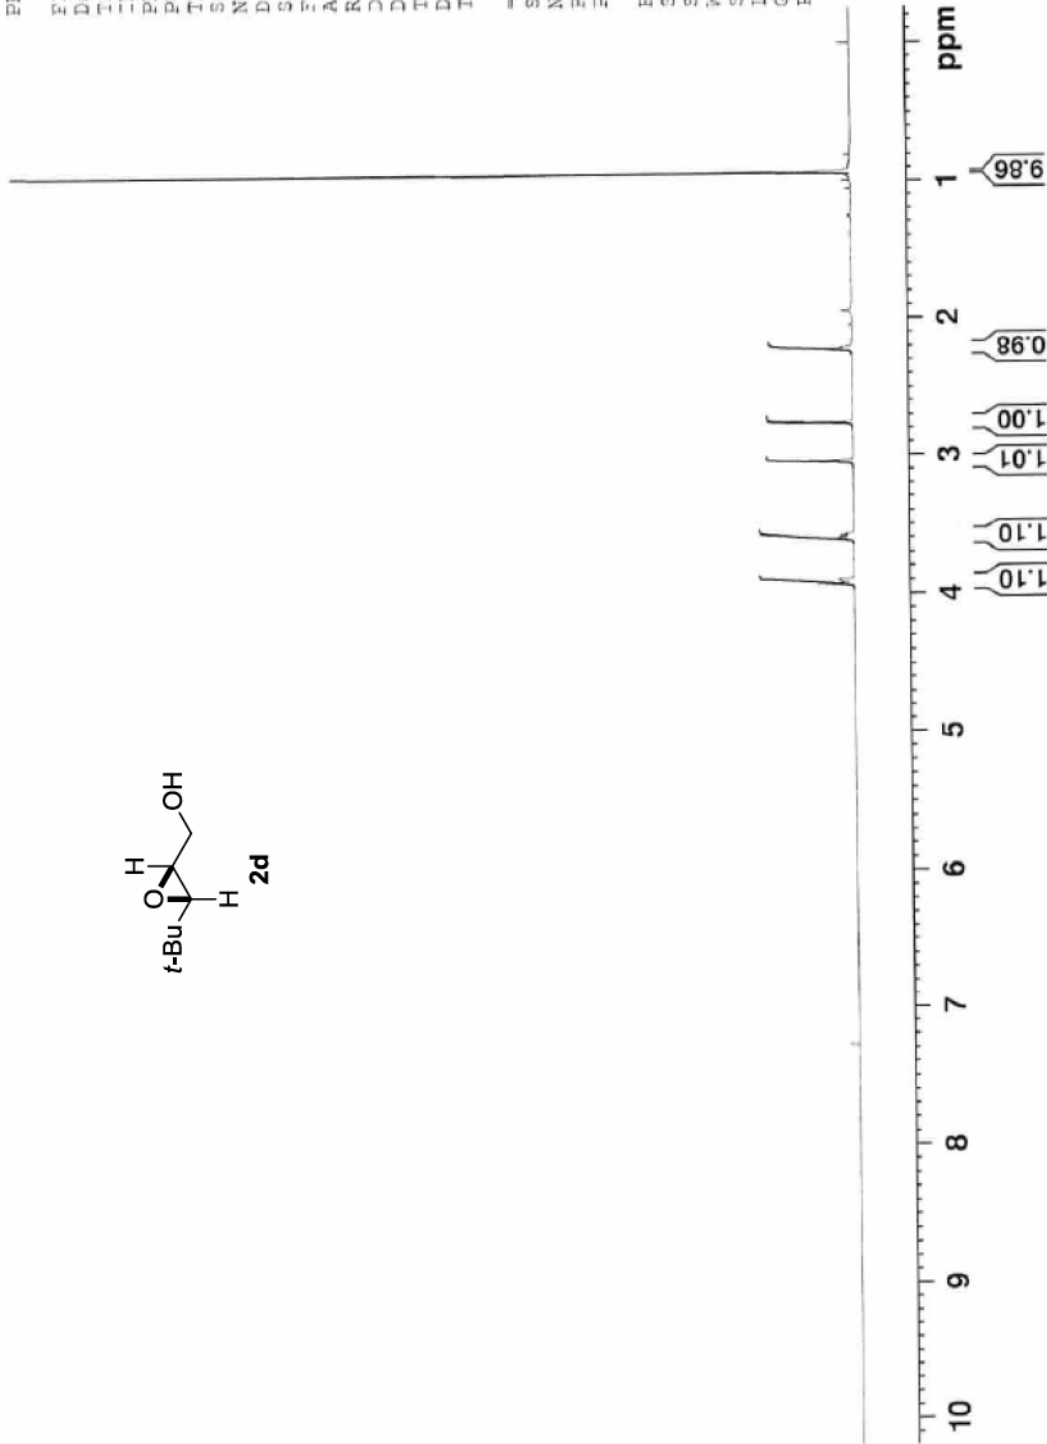

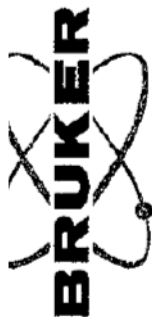

Current Data Parameters  
NAME cw352c-13c  
EXPNO 1  
PROCNO 1

F2 - Acquisition Parameters

Date\_ 20130616  
Time 19.40  
INSTRUM spect  
PROBHD 5 mm PATXI JH/  
PULPROG zgdc  
TD 178568  
SOLVENT CDC13  
NS 354  
DS 0  
SWH 32894.738 Hz  
FIDRES 0.184214 Hz  
AQ 2.7142336 sec  
RG 196.79  
DW 15.200 usec  
DE 10.00 usec  
TE 296.0 K  
D1 3.0000000 sec  
D11 0.0300000 sec  
TDO 1

==== CHANNEL f1 =====  
SFO1 125.7703648 MHz  
NUC1 13C  
P1 14.00 usec  
PLW1 170.0000000 W

==== CHANNEL f2 =====  
SFO2 500.1320005 MHz  
NUC2 1H  
CPDPRG[2] waltz16  
PCPD2 90.00 usec  
PLW2 12.19999981 W  
PLW12 0.20893000 W

F2 - Processing parameters

SI 131072  
SF 125.7577751 MHz  
WDW EM  
SSB 0  
LB 1.00 Hz  
GB 0  
PC 1.40

63.88  
62.88  
55.51  
30.50  
25.91

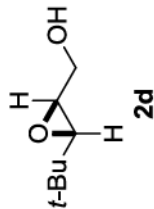

220 200 180 160 140 120 100 80 60 40 20 0 ppm

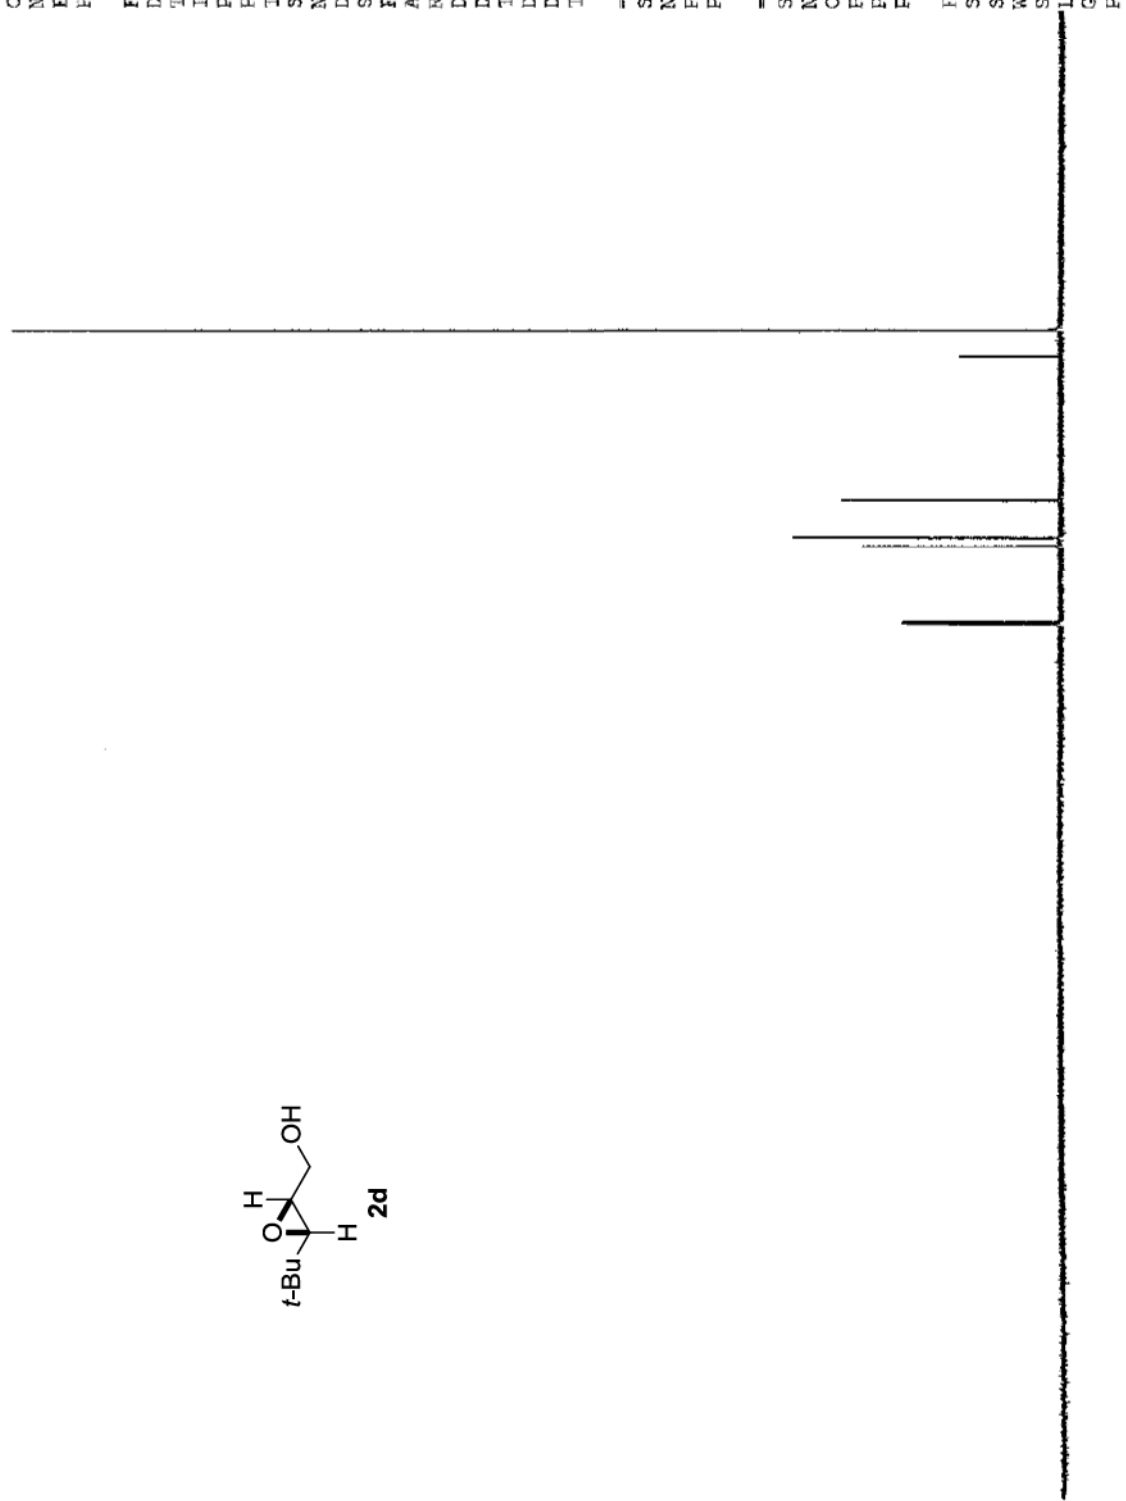

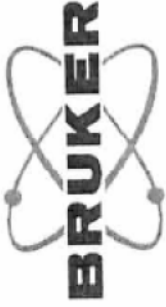

Current Data Parameters  
 NAME cw366a  
 EXPNO 1  
 PROCNO 1

F2 - Acquisition Parameters  
 Date\_ 20130628  
 Time 19.26  
 INSTRUM spect  
 PROBHD 5 mm PAXI 1H/  
 PULPROG zg  
 ID 59998  
 SOLVENT CDC13  
 NS 8  
 DS 0  
 SWH 10000.000 Hz  
 FIDRES 0.166672 Hz  
 AQ 2.9999001 sec  
 RG 87.71  
 DW 50.000 usec  
 DE 10.00 usec  
 TE 294.6 K  
 D1 5.00000000 sec  
 TD0 1

===== CHANNEL f1 =====  
 SF01 500.1330685 MHz  
 NUC1 1H  
 P1 8.00 usec  
 PLW1 12.19999981 W  
 F2 - Processing parameters  
 SI 65536  
 SF 500.1300101 MHz  
 WDW EM  
 SSB 0  
 LB 0.30 Hz  
 GB 0  
 PC 1.00

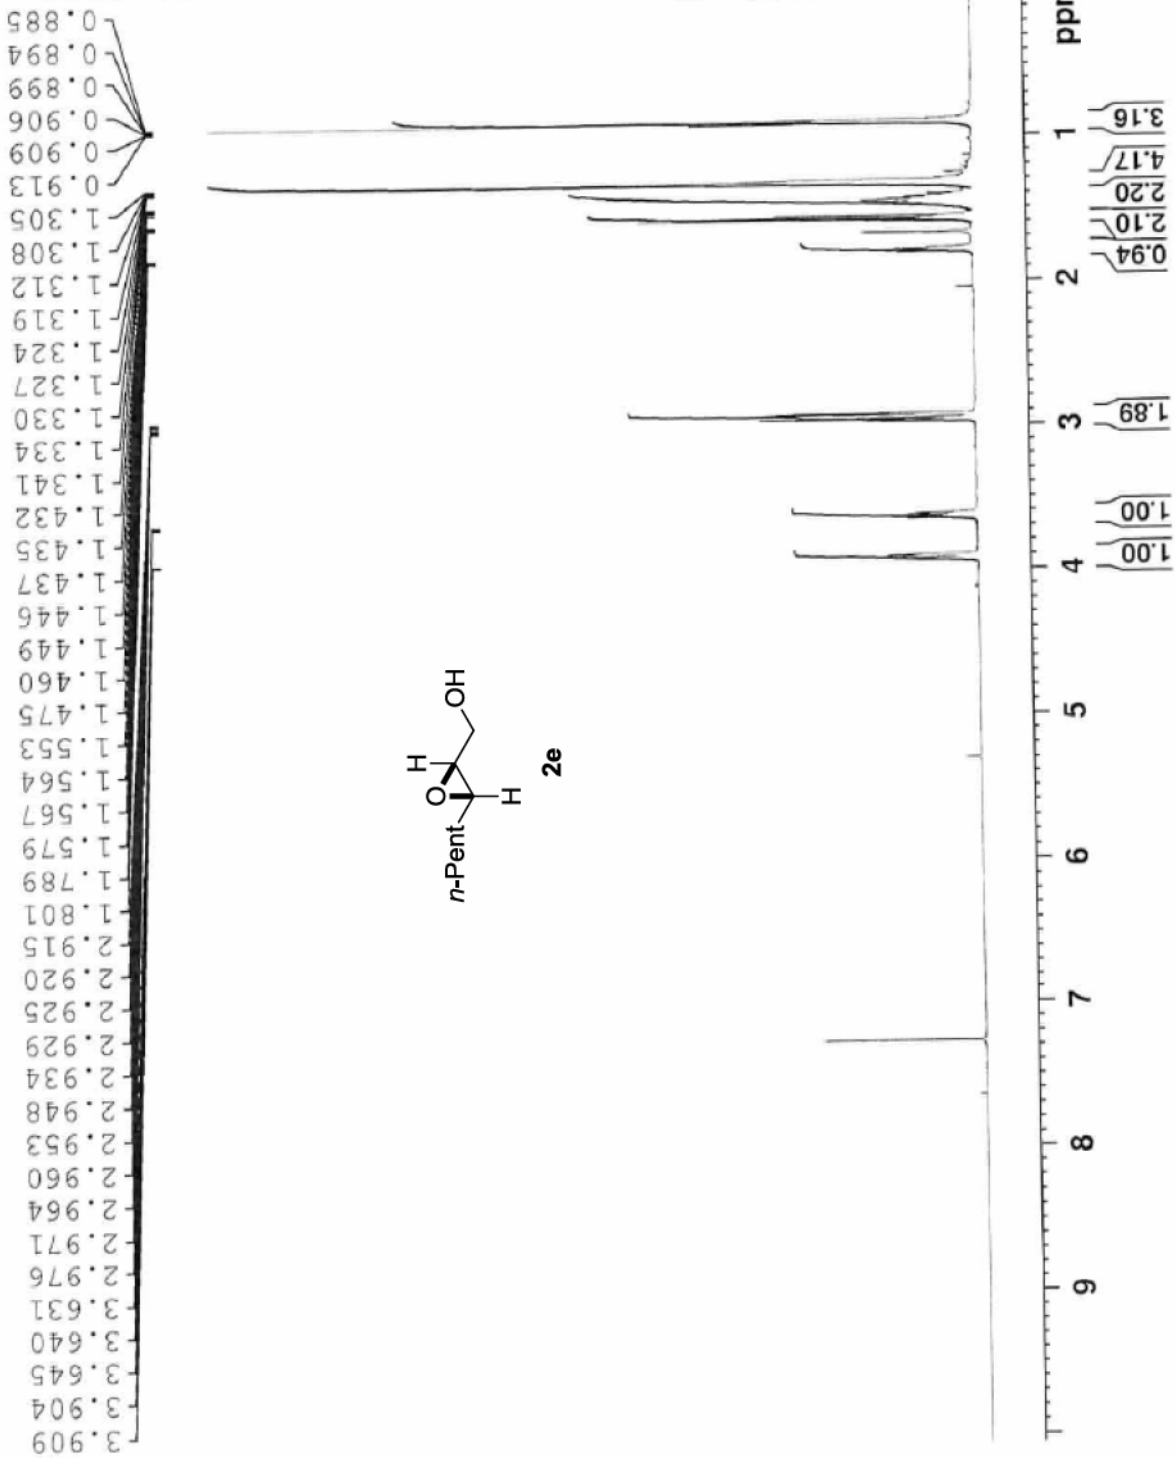

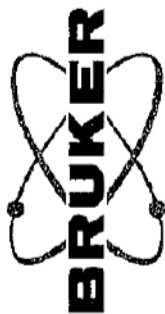

Current Data Parameters  
NAME CW366a\_13C  
EXPNO 1  
PROCNO 1

F2 - Acquisition Parameters  
Date\_ 20130628  
Time 20.00  
INSTRUM spect  
PROBHD 5 mm PATXI IH/  
PULPROG zgdc  
TD 178568  
SOLVENT CDCl3  
NS 271  
DS 0  
SWH 32894.738 Hz  
FIDRES 0.184214 Hz  
AQ 2.7142336 sec  
RG 196.79  
DW 15.200 use  
DE 10.00 use  
TE 295.6 K  
D1 3.0000000 sec  
D11 0.0300000 sec  
TD0 1

=====  
CHANNEL f1  
SFO1 125.7703548 MHz  
NUC1 13C  
P1 14.00 use  
PLW1 170.0000000 W

=====  
CHANNEL f2  
SFO2 500.1320005 MHz  
NUC2 1H  
CPDPRG|2 waltz16  
PCPD2 90.00 use  
PLW2 12.19999981 W  
PLW12 0.20893000 W

F2 - Processing parameters  
SI 131.072  
SF 125.7577720 MHz  
WDW EM  
SSB 0  
LB 1.00 Hz  
GB 0  
PC 1.40

61.95  
58.56  
56.34  
31.71  
31.66  
32.77  
32.70  
34.13

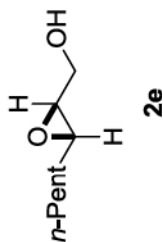

220 200 180 160 140 120 100 80 60 40 20 0 ppm



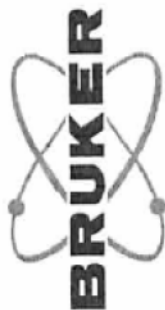

Current Data Parameters  
NAME cw395a1  
EXPNO 1  
PROCNO 1

F2 - Acquisition Parameters  
Date\_ 20130717  
Time 17.20  
INSTRUM spect  
PROBHD 5 mm PA1XI 1H/  
PULPROG zg  
TD 59998  
SOLVENT CDCl3  
NS 8  
DS 0  
SWH 10000.000 Hz  
FIDRES 0.166672 Hz  
AQ 2.9999001 sec  
RG 52.86  
DW 50.000 usec  
DE 10.00 usec  
TE 294.9 K  
D1 5.00000000 sec  
TD0 1

----- CHANNEL #1 -----  
SFO1 500.1330885 MHz  
NUC1 1H  
P1 8.00 usec  
PLW1 12.19999981 W

F2 - Processing parameters  
SI 65536  
SF 500.1300157 MHz  
WDW EM  
SSB 0  
LB 0.30 Hz  
GB 0  
PC 1.00

7.367  
7.364  
7.360  
7.350  
7.347  
7.338  
7.336  
7.328  
7.324  
7.321  
7.316  
7.311  
7.296  
7.289  
7.286  
7.282  
7.276  
7.273  
7.270  
4.061  
4.056  
4.051  
4.040  
4.036  
4.030  
4.026  
3.932  
3.928  
3.817  
3.809  
3.803  
3.794  
3.784  
3.777  
3.240  
3.235  
3.231  
3.231  
3.227  
3.223  
2.286  
2.274  
2.272  
2.260

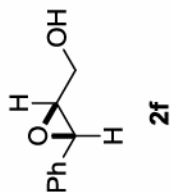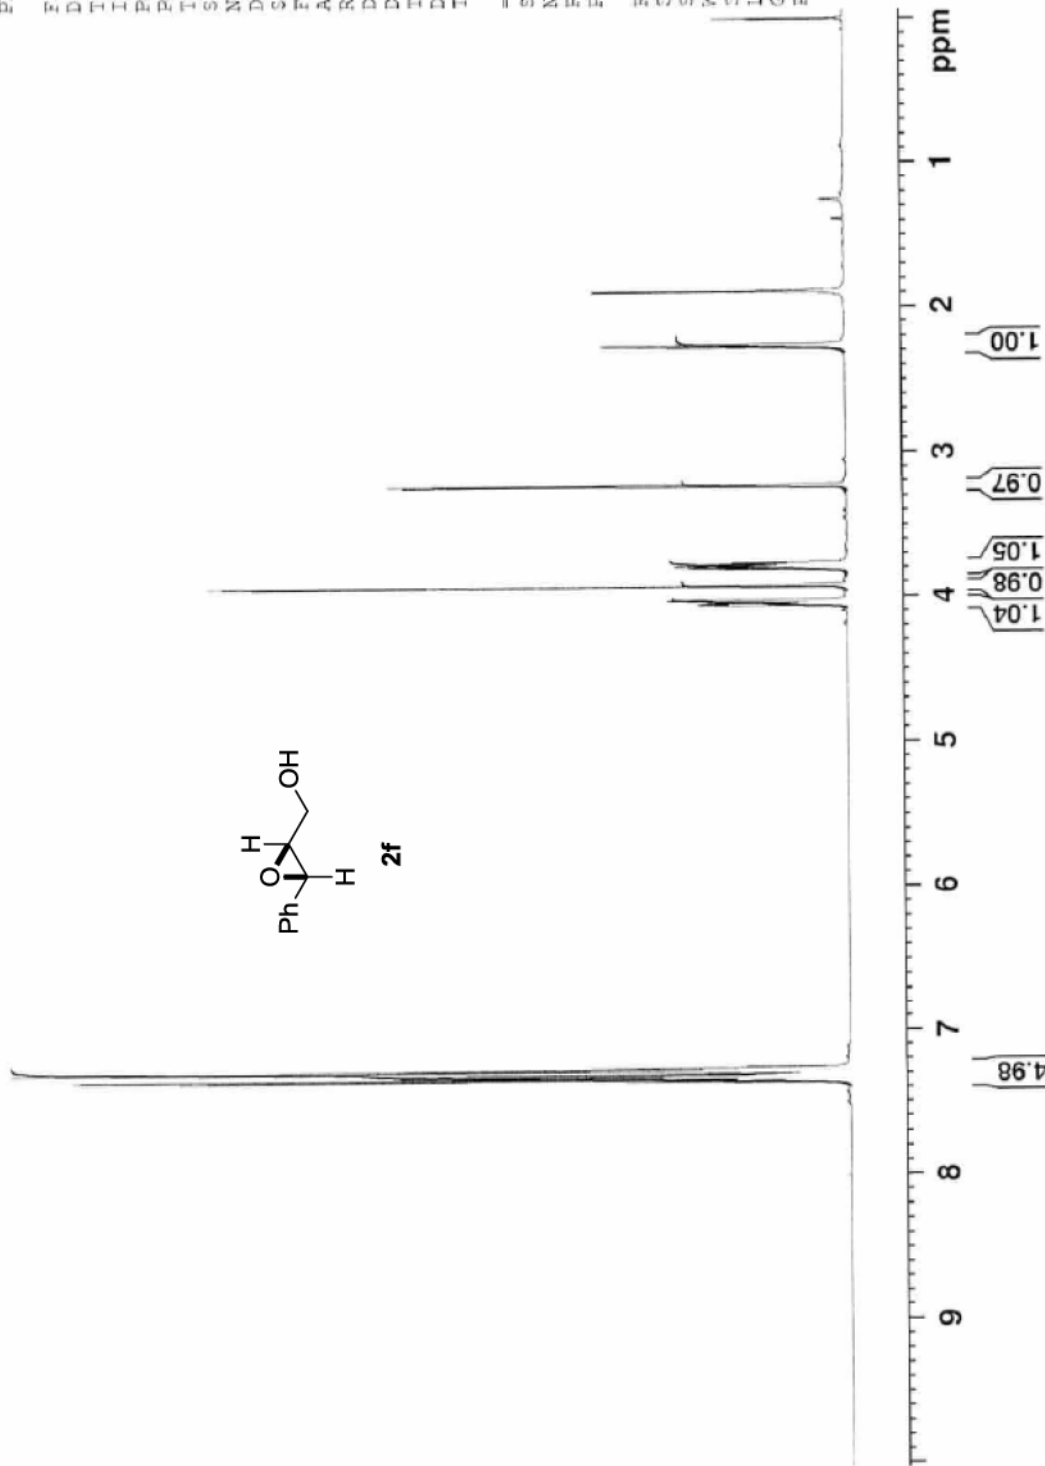

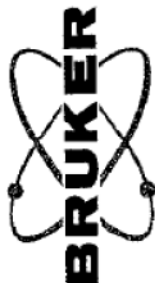

Current Data Parameters  
NAME cw399a-13C  
EXPNO 1  
PROCNO 1

F2 - Acquisition Parameters

Date\_ 20130717  
Time 12.00  
INSTRUM spect  
PROBHD 5 mm PAXI 1H/  
PULPROG zgdc  
TD 178568  
SOLVENT CDCl3  
NS 269  
DS 0  
SWH 32894.736 Hz  
FIDRES 0.184214 Hz  
AQ 2.7142336 sec  
RG 196.79  
DW 15.200 usec  
DE 10.00 usec  
TE 296.1 K  
D1 3.0000000 sec  
D11 0.0300000 sec  
TDO 1

===== CHANNEL f1 =====  
SF01 125.7703648 MHz  
NUC1 13C  
P1 14.00 usec  
PLW1 170.0000000 W

===== CHANNEL f2 =====  
SF02 500.1320005 MHz  
NUC2 1H  
CPDPRG[2] waltz16  
PCPD2 90.00 usec  
PLW2 12.1999981 W  
PLW12 0.2089300 W

F2 - Processing parameters  
SI 131072  
SF 125.7577757 MHz  
WDW EM  
SSB 0  
LB 0  
GB 0  
PC 1.40

125.86  
128.46  
128.65  
136.78

62.57  
61.40  
55.74

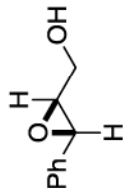

2f

ppm

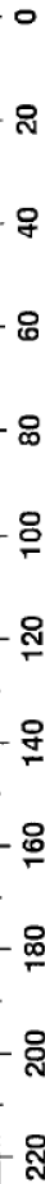

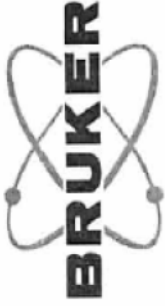

Current Data Parameters  
NAME cw411a1  
EXPNO 1  
PROCNO 1

F2 - Acquisition Parameters  
Date\_ 20130727  
Time 17.19  
INSTRUM spect  
PROBHD 5 mm PAIXI 1H/  
PULPROG zg  
TD 59998  
SOLVENT CDC13  
NS 8  
DS 0  
SWH 10000.000 Hz  
FIDRES 0.166672 Hz  
AQ 2.9999001 sec  
RG 37.62  
DW 50.000 usec  
DE 10.00 usec  
TE 296.9 K  
D1 5.00000000 sec  
TD0 1

===== CHANNEL f1 =====  
SFO1 500.1330885 MHz  
NUC1 1H  
P1 8.00 usec  
PL1 12.19999981 W

F2 - Processing parameters  
SI 65536  
SF 500.1300108 MHz  
WDW 0  
SSB 0  
LB 0.30 Hz  
GB 0  
PC 1.00

7.266  
7.261  
7.257  
7.250  
7.247  
7.243  
7.237  
7.233  
7.058  
7.052  
7.048  
7.035  
7.031  
7.022  
7.018  
4.061  
4.057  
4.052  
4.047  
4.036  
4.032  
4.026  
4.022  
3.921  
3.917  
3.822  
3.814  
3.807  
3.799  
3.789  
3.782  
3.774  
3.201  
3.197  
3.193  
3.189  
3.185  
2.244  
2.232  
2.218

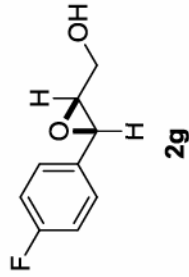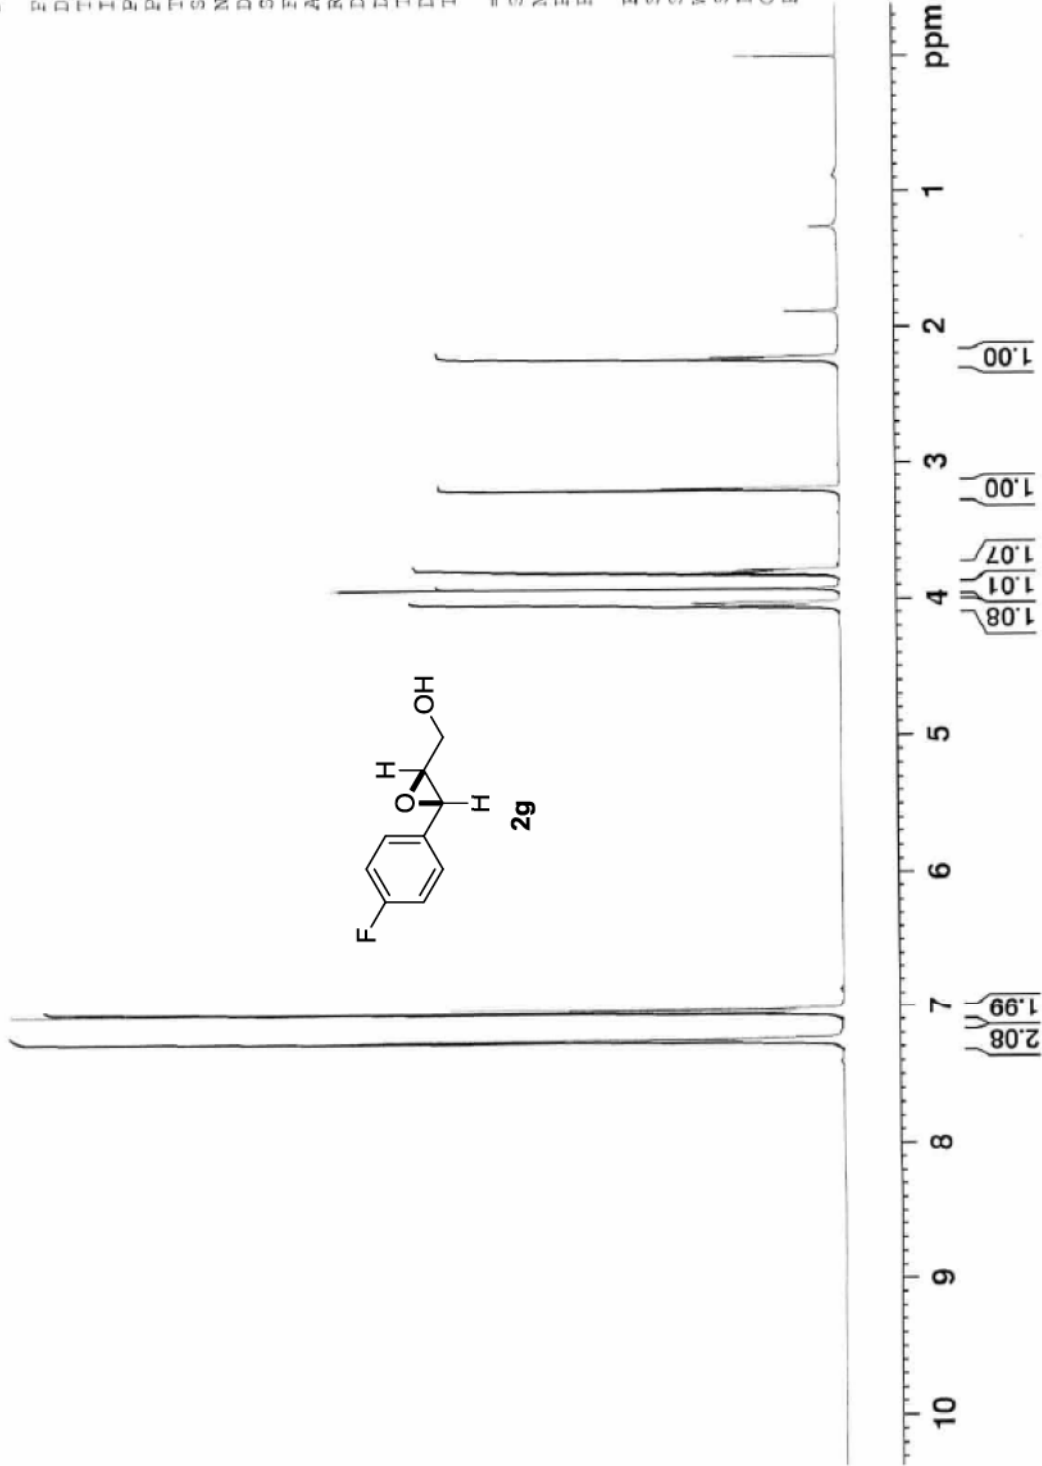

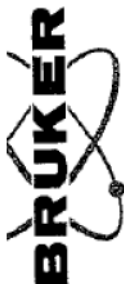

Current Data Parameters  
NAME cw411a1-13C  
EXPNO 1  
PROCNO 1

F2 - Acquisition Parameters

Date\_ 20130727  
Time 17.52  
INSTRUM spect  
PROBHD 5 mm PAXI 1H/  
PULPROG zgdc  
TD 178568  
SOLVENT CDCl3  
NS 440  
DS 0  
SWH 32894.738 Hz  
FIDRES 0.184214 Hz  
AQ 2.7142336 sec  
RG 196.79  
DW 15.200 usec  
DE 10.00 usec  
TE 297.7 K  
D1 1.00000000 sec  
D11 0.03000000 sec  
TDO 1

CHANNEL f1  
SFO1 125.7703648 MHz  
NUC1 13C  
P1 14.00 usec  
PLW1 170.0000000 W

CHANNEL f2  
SFO2 500.1320005 MHz  
NUC2 1H  
CPDPRG[2] waltz16  
PCPD2 90.00 usec  
PLW2 12.19999981 W  
PLWI2 0.20893000 W

F2 - Processing parameters  
SI 131072  
SF 125.7577742 MHz  
WDW EM  
SSB 0  
LB 1.00 Hz  
GB 0  
PC 1.40

163.89  
161.93  
132.55  
132.55  
127.59  
127.53  
115.74  
115.56  
62.55  
61.26  
55.18

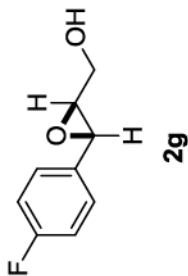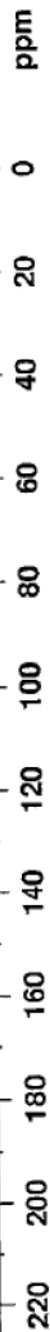

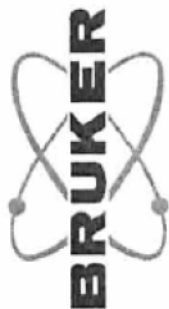

Current Data Parameters  
NAME cw360a  
EXPNO 1  
PROCNO 1

F2 - Acquisition Parameters  
Date\_ 20130621  
Time 9.19  
INSTRUM spect  
PROBHD 5 mm PATXI 1H/  
PULPROG zg  
ID 59998  
SOLVENT CDCl3  
NS 16  
DS 0  
SWH 10000.000 Hz  
FIDRES 0.166672 Hz  
AQ 2.9999001 sec  
RG 37.62  
DW 50.000 usec  
DE 10.00 usec  
TE 295.2 K  
D1 5.0000000 sec  
TD0 1

==== CHANNEL f1 =====  
SF01 500.1330885 MHz  
NUC1 1H  
P1 8.00 usec  
PLW1 12.19999981 W

F2 - Processing parameters  
SI 65536  
SF 500.1300132 MHz  
WDW EM  
SSB 0  
LB 0.30 Hz  
GB 0  
PC 1.00

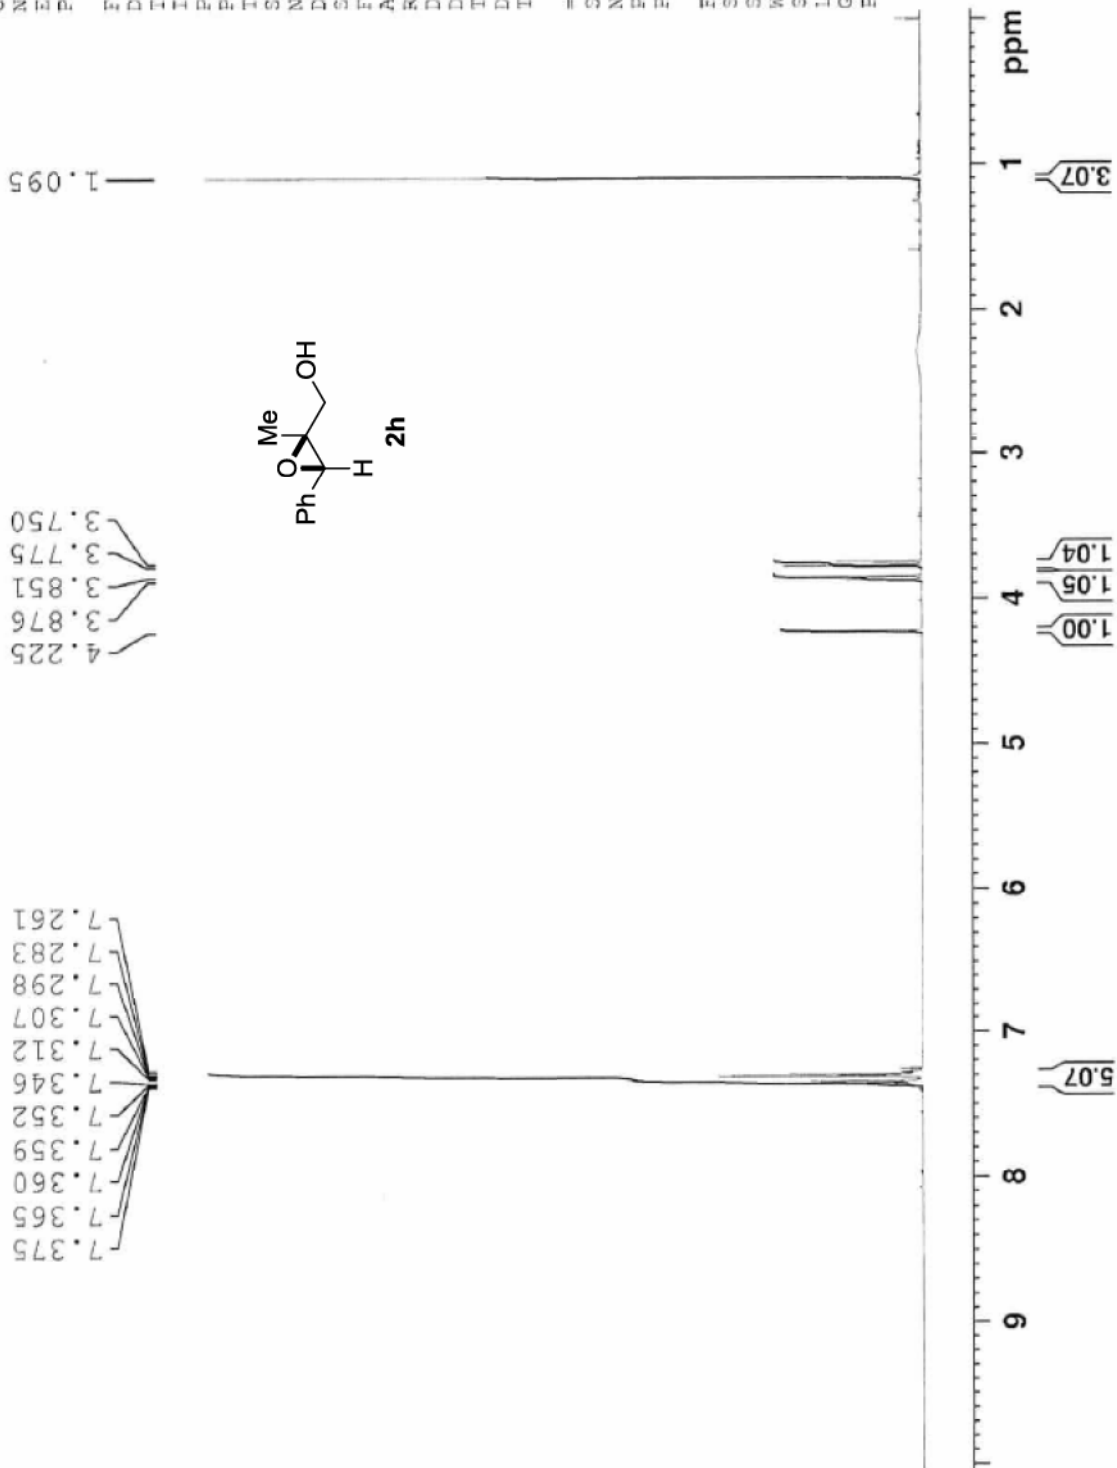

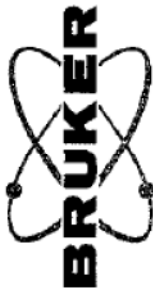

Current Data Parameters  
 NAME cw360a-13C  
 EXENO 1  
 PROCNO 1

F2 - Acquisition Parameters

Date\_ 20130621  
 Time 9.45  
 INSTRUM spect  
 PROBD 5 mm FATHI 1H/  
 PULPROG zgdc  
 TD 178568  
 SOLVENT CDC13  
 NS 235  
 DS 0  
 SWH 32894.738 Hz  
 FIDRES 0.184214 Hz  
 AQ 2.7142336 sec  
 RG 196.79  
 DW 15.200 usec  
 DE 10.00 usec  
 TE 296.1 K  
 D1 3.00000000 sec  
 D11 0.03000000 sec  
 TD0 1

CHANNEL f1  
 SFO1 125.7703648 MHz  
 NUC1 13C  
 P1 14.00 usec  
 PLW1 170.00000000 W

CHANNEL f2  
 SFO2 500.1320005 MHz  
 NUC2 1H  
 CPDPRG2 waltz16  
 PCPD2 90.00 usec  
 PLW2 12.19999981 W  
 PLW12 0.20893000 W

F2 - Processing parameters  
 SI 131072  
 SF 125.7577743 MHz  
 NDW EM  
 SSB 0  
 LB 1.00 Hz  
 GB 0  
 PC 1.40

126.54  
127.72  
128.25  
135.71

55.09  
55.69  
56.09

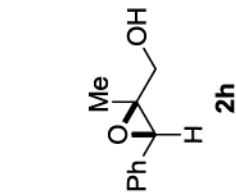

135.71  
128.25  
127.72  
126.54

55.09  
55.69  
56.09

220 200 180 160 140 120 100 80 60 40 20 0 ppm

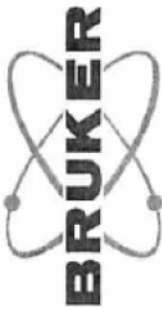

Current Data Parameters  
NAME cw379a  
EXPNO 1  
PROCNO 1

F2 - Acquisition Parameters  
Date\_ 20130707  
Time 17.10  
INSTRUM spect  
PROBHD 5 mm PATXI 1H/  
PULPROG zg  
TD 59998  
SOLVENT CDCl3  
NS 8  
DS 0  
SWH 10000.000 Hz  
FIDRES 0.166672 Hz  
AQ 2.9999001 sec  
RG 30.11  
DW 50.000 usec  
DE 10.00 usec  
TE 295.5 K  
D1 5.00000000 sec  
TDO 1

===== CHANNEL f1 =====  
SFO1 500.1330885 MHz  
NUC1 1H  
P1 8.00 usec  
PLW1 12.19999981 W

F2 - Processing parameters  
SI 65536  
SF 500.1300218 MHz  
WDW EM  
SSB 0  
LB 0.30 Hz  
GB 0  
PC 1.00

2.294  
2.281  
2.268

4.522  
4.041  
4.032  
4.027

7.204  
7.196  
7.191  
7.113  
7.106  
7.100  
7.042  
7.039  
7.035  
7.034  
7.028  
7.023

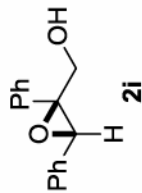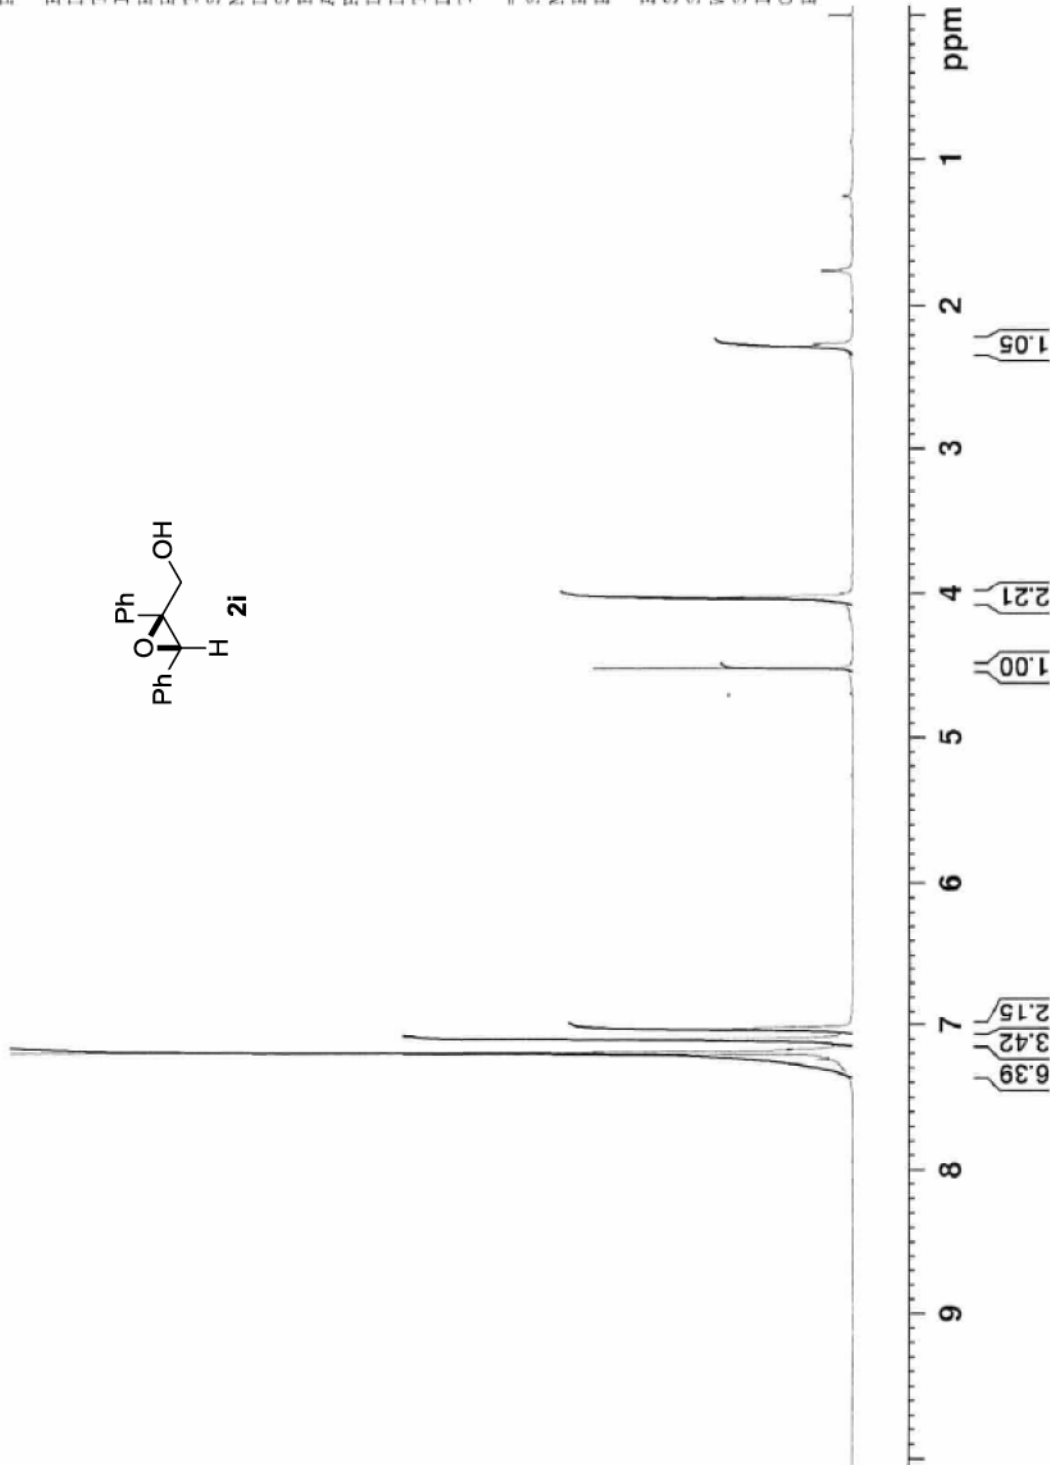

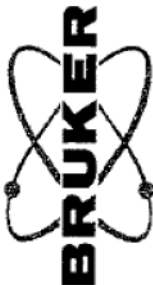

Current Data Parameters  
 NAME cw379a\_13C  
 EXPNO 1  
 PROCNO 1

F2 - Acquisition Parameters  
 Date\_ 20130707  
 Time 18.45  
 INSTRUM spect  
 PROBHD 5 mm PATXI 1H/  
 PULPROG zgdc  
 TD 178568  
 SOLVENT CDCl3  
 NS 314  
 DS 0  
 SWH 32894.738 Hz  
 FIDRES 0.164214 Hz  
 AQ 2.7142336 sec  
 RG 196.79  
 DW 15.200 usec  
 DE 10.00 usec  
 TE 296.3 K  
 D1 3.00000000 sec  
 D11 0.03000000 sec  
 TD0 1

==== CHANNEL f1 =====  
 SFO1 125.7703648 MHz  
 NUC1 13C  
 P1 14.00 usec  
 PLW1 170.00000000 W

==== CHANNEL f2 =====  
 SFO2 500.1320005 MHz  
 NUC2 1H  
 CPDPRG[2] waltz16  
 PCPD2 90.00 usec  
 PLW2 12.1999981 W  
 PLW12 0.20893000 W

F2 - Processing parameters  
 SI 131072  
 SF 125.757772 MHz  
 WDW EM  
 SSB 0  
 LB 1.00 Hz  
 GB 0  
 PC 1.40

134.85  
 134.50  
 128.17  
 127.98  
 127.86  
 127.80  
 127.69  
 126.73  
 69.28  
 65.10  
 60.93

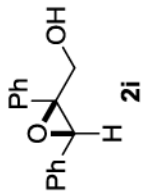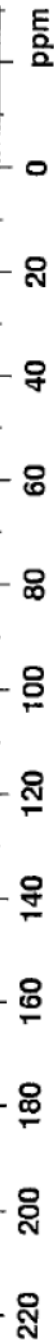



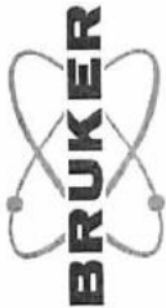

Current Data Parameters  
 NAME CW358a  
 EXFNO 1  
 PROCNO 1

F2 - Acquisition Parameters

Date\_ 20130619  
 Time 18.23  
 INSTRUM spect  
 PROBEHD 5 mm PA1X1 1H/  
 PULPROG zg  
 ID 59998  
 SOLVENT CDC13  
 NS 8  
 DS 0  
 SWH 10000.000 Hz  
 FIDRES 0.166672 Hz  
 AQ 2.9999001 sec  
 RG 71.78  
 DW 50.000 usec  
 DE 10.00 usec  
 TE 295.8 K  
 D1 5.00000000 sec  
 TD0

===== CHANNEL f1 =====  
 SFO1 500.133085 MHz  
 NUC1 1H  
 P1 8.00 usec  
 PLW1 12.19999961 W

F2 - Processing parameters  
 SI 65536  
 SF 500.1300078 MHz  
 WDW EM  
 SGB 0  
 LB 0.30 Hz  
 GB 0  
 PC 1.00

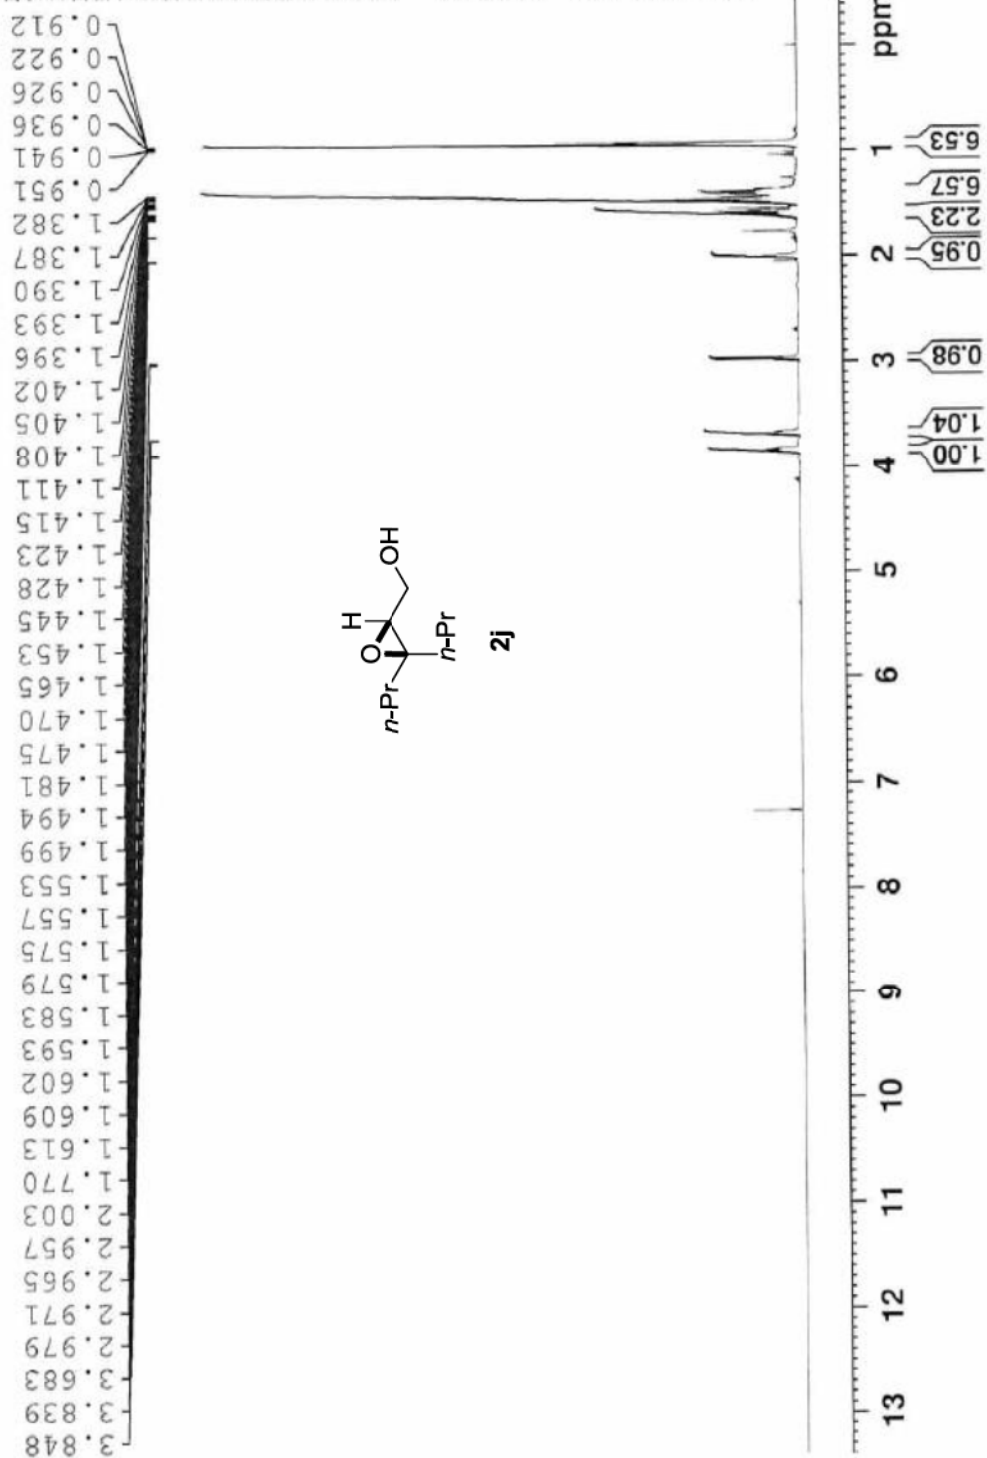

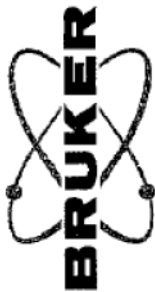

Current Data Parameters  
NAME cw358a-13C  
EXPNO 1  
PROCNO 1

F2 - Acquisition Parameters

Date\_ 20130619  
Time 18.43  
INSTRUM spect  
PROBHD 5 mm PAXI 1H/  
PULPROG zgdc  
TD 178568  
SOLVENT CDCl3  
NS 164  
DS 0  
SWH 32894.738 Hz  
FIDRES 0.184214 Hz  
AQ 2.7142336 sec  
RG 196.79  
DW 15.200 usec  
DE 10.00 usec  
TE 296.6 K  
D1 3.0000000 sec  
D11 0.0300000 sec  
TDO 1

=====  
CHANNEL f1  
SFO1 125.7703648 MHz  
NUC1 13C  
P1 14.00 usec  
PLW1 170.0000000 W

=====  
CHANNEL f2  
SFO2 500.1320005 MHz  
NUC2 1H  
CPDPRG[2] waltz16  
PCPD2 90.00 usec  
PLW2 12.1999981 W  
PLW12 0.20893000 W

F2 - Processing parameters  
SI 131072  
SF 125.7577746 MHz  
WDW EM  
SSD 0  
LB 0  
GB 0  
PC 1.40

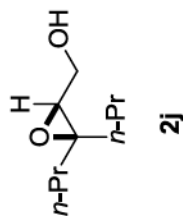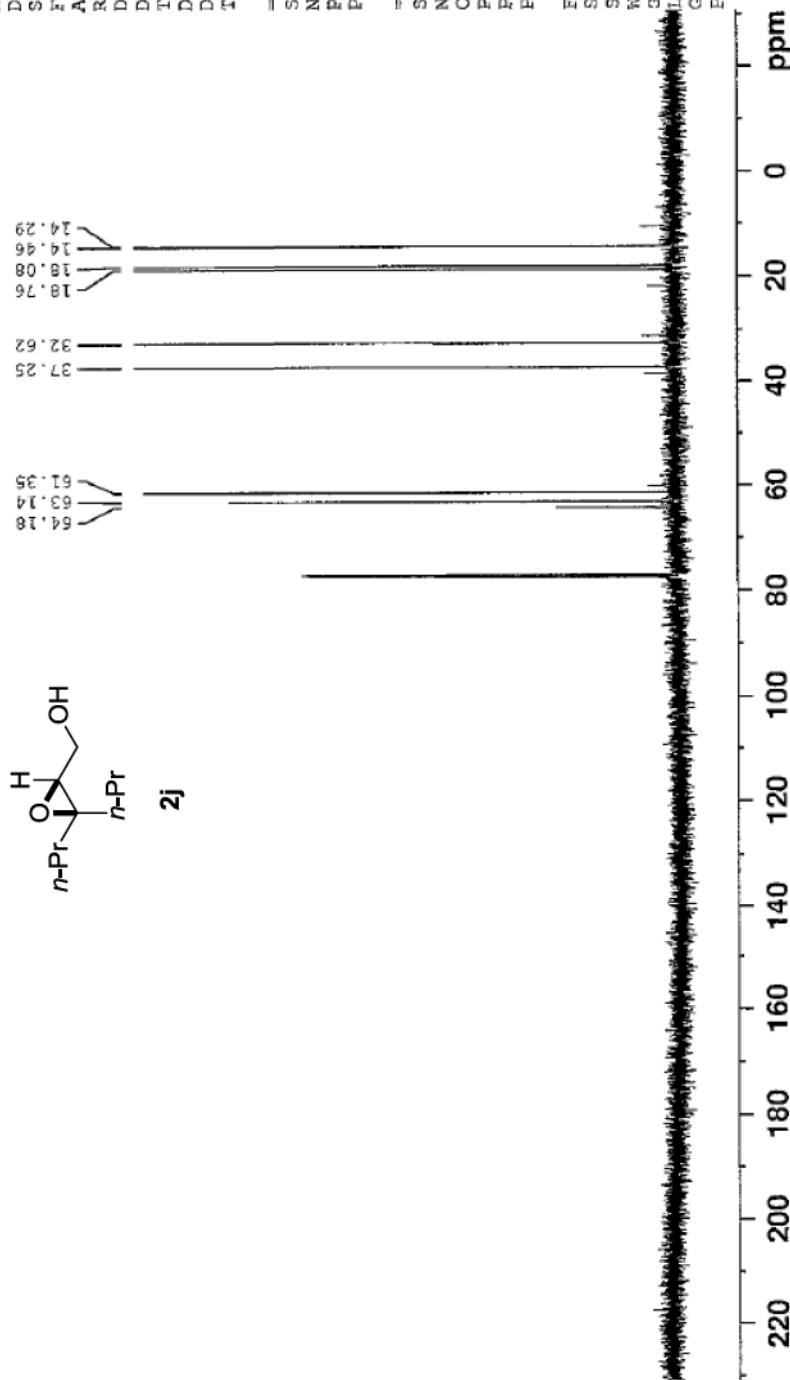

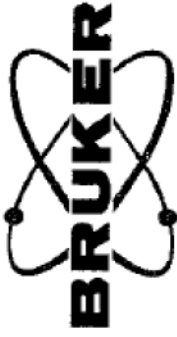

Current Data Parameters  
 NAME cw376d  
 EXPNO 1  
 PROCNO 1

F2 - Acquisition Parameters  
 Date\_ 20131218  
 Time 11.22  
 INSTRUM spect  
 PROBHD 5 mm PATXI 1H/  
 PULPROG zg  
 TD 59998  
 SOLVENT CDC13  
 NS 4  
 DS 0  
 SWH 10000.000 Hz  
 FIDRES 0.166672 Hz  
 AQ 2.9999001 sec  
 RG 79.04  
 DW 50.000 usec  
 DE 10.00 usec  
 TE 295.8 K  
 D1 5.0000000 sec  
 ID0 1

CHANNEL f1  
 SFO1 500.1330885 MHz  
 NUC1 1H  
 P1 8.00 usec  
 PLW1 12.19999981 W

F2 - Processing parameters  
 SI 65536  
 SF 500.1300117 MHz  
 WDW EM  
 SSB 0  
 LB 0.30 Hz  
 GB 0  
 PC 1.00

5.113  
5.110  
5.101  
5.099  
5.096  
5.087  
5.084  
3.824  
3.814  
3.804  
3.800  
3.791  
3.692  
3.683  
3.678  
3.669  
2.977  
2.969  
2.964  
2.955  
2.139  
2.120  
2.101  
2.084  
2.068  
1.757  
1.745  
1.734  
1.695  
1.693  
1.676  
1.665  
1.657  
1.646  
1.620  
1.514  
1.500  
1.494  
1.486  
1.480  
1.472  
1.467  
1.453  
1.346

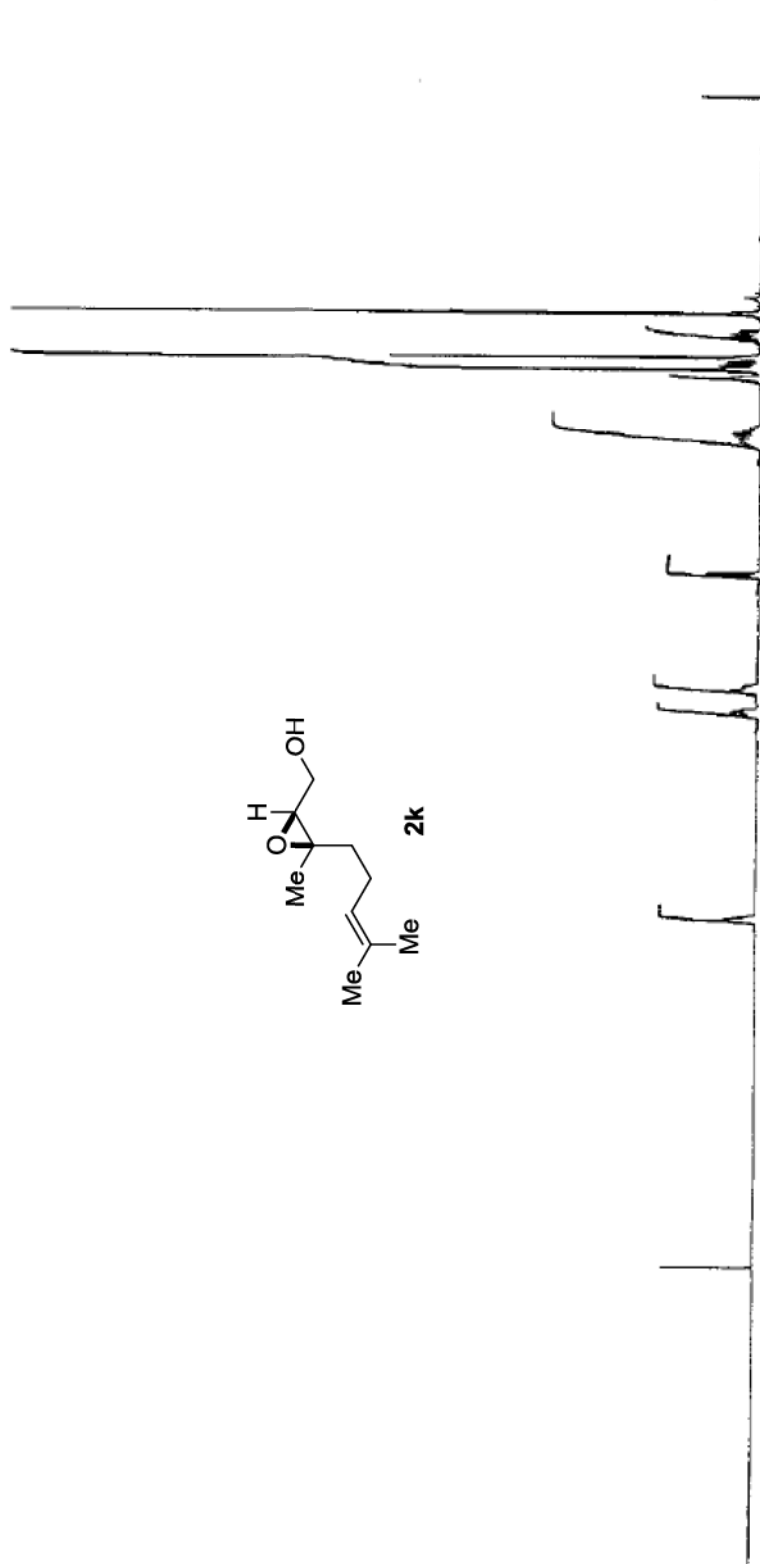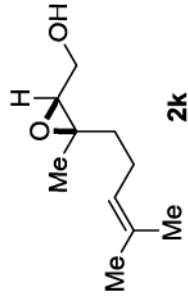

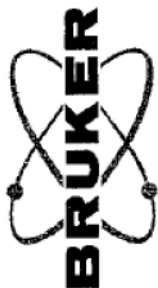

Current Data Parameters  
NAME cw376b-13C  
EXPNO 1  
PROCNO 1

F2 - Acquisition Parameters

Date\_ 20130704  
Time 18.59  
INSTRUM spect  
PROBHD 5 mm PATXI 1H/  
PULPROG zgdc  
TD 178568  
SOLVENT CDC13  
NS 512  
DS 0  
SWH 32894.738 Hz  
FIDRES 0.164214 Hz  
AQ 2.7142336 sec  
RG 196.79  
DW 15.200 usec  
DE 10.00 usec  
TE 296.2 K  
D1 3.00000000 sec  
D11 0.03000000 sec  
TD0 1

CHANNEL f1  
SFO1 125.7703648 MHz  
NUC1 13C  
P1 14.00 usec  
PLW1 170.00000000 W

CHANNEL f2  
SFO2 500.1320005 MHz  
NUC2 1H  
CPDPRG[2] waltz16  
PCPD2 90.00 usec  
PLW2 12.19999981 W  
PLW12 0.20893000 W

F2 - Processing parameters  
SI 131072  
SF 125.7577709 MHz  
WDW EM  
SSB 0  
LB 1.00 Hz  
GB 0  
PC 1.40

33.27  
25.80  
24.33  
22.32  
17.76

64.25  
61.64  
61.43

132.71  
133.45

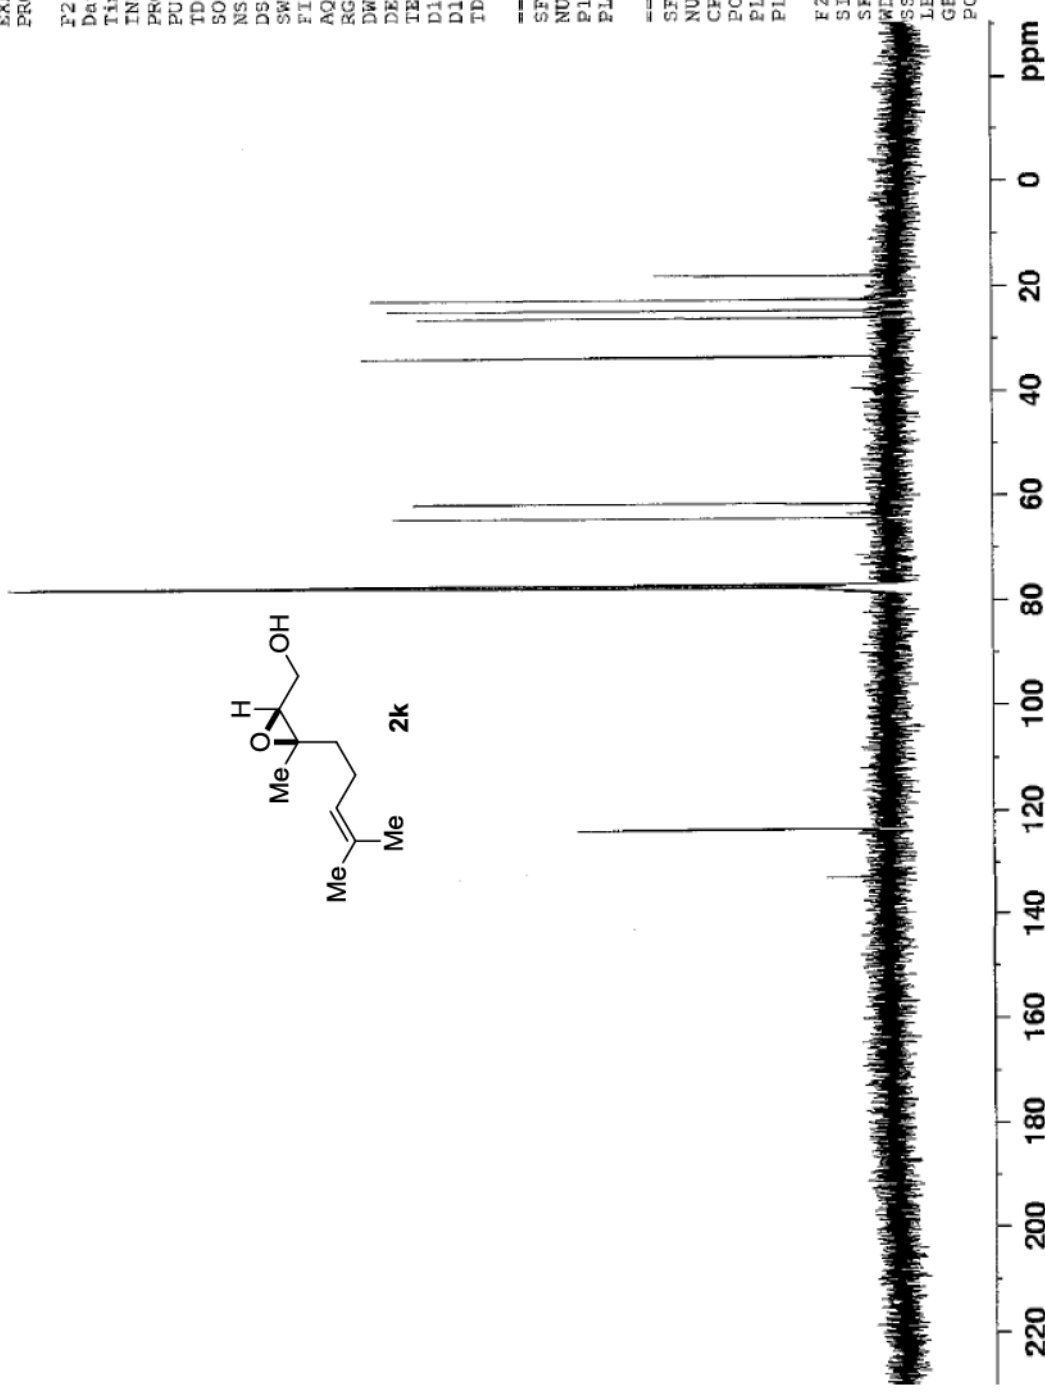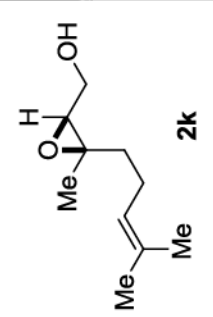

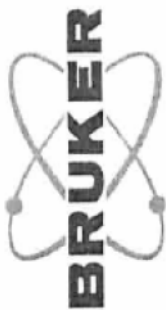

Current Data Parameters  
NAME cw450b  
EXPNO 1  
PROCNO 1

F2 - Acquisition Parameters  
Date\_ 20130927  
Time 17.43  
INSTRUM Spect  
PROBHD 5 mm PATXI 1H/  
PULPROG zg  
TD 59998  
SOLVENT CDCl3  
NS 16  
DS 0  
SWH 1000.000 Hz  
FIDREC 0.166872 Hz  
AQ 1.9999001 sec  
RG 71.78  
DW 50.000 usec  
DE 10.00 usec  
TE 297.2 K  
D1 5.0000000 sec  
TD0 1

===== CHANNEL f1 =====  
SF01 500.1330895 MHz  
NUC1 1H  
P1 6.00 usec  
PLW1 12.19999981 W

F2 - Processing parameters  
SI 65536  
SF 500.1300117 MHz  
WDW EM  
SSE 0  
LB 0.30 Hz  
GB 0  
PC 1.00

5.113  
5.101  
5.099  
5.097  
5.086  
5.083  
5.080  
5.069  
5.048  
5.040  
5.024  
5.015  
5.005  
3.692  
3.681  
3.668  
2.992  
2.983  
2.979  
2.970  
2.106  
2.090  
2.073  
2.057  
2.043  
1.995  
1.979  
1.965  
1.725  
1.711  
1.709  
1.698  
1.695  
1.680  
1.667  
1.607  
1.600  
1.507  
1.493  
1.489  
1.480  
1.474  
1.464  
1.305

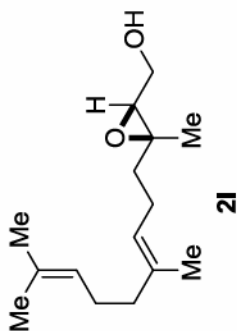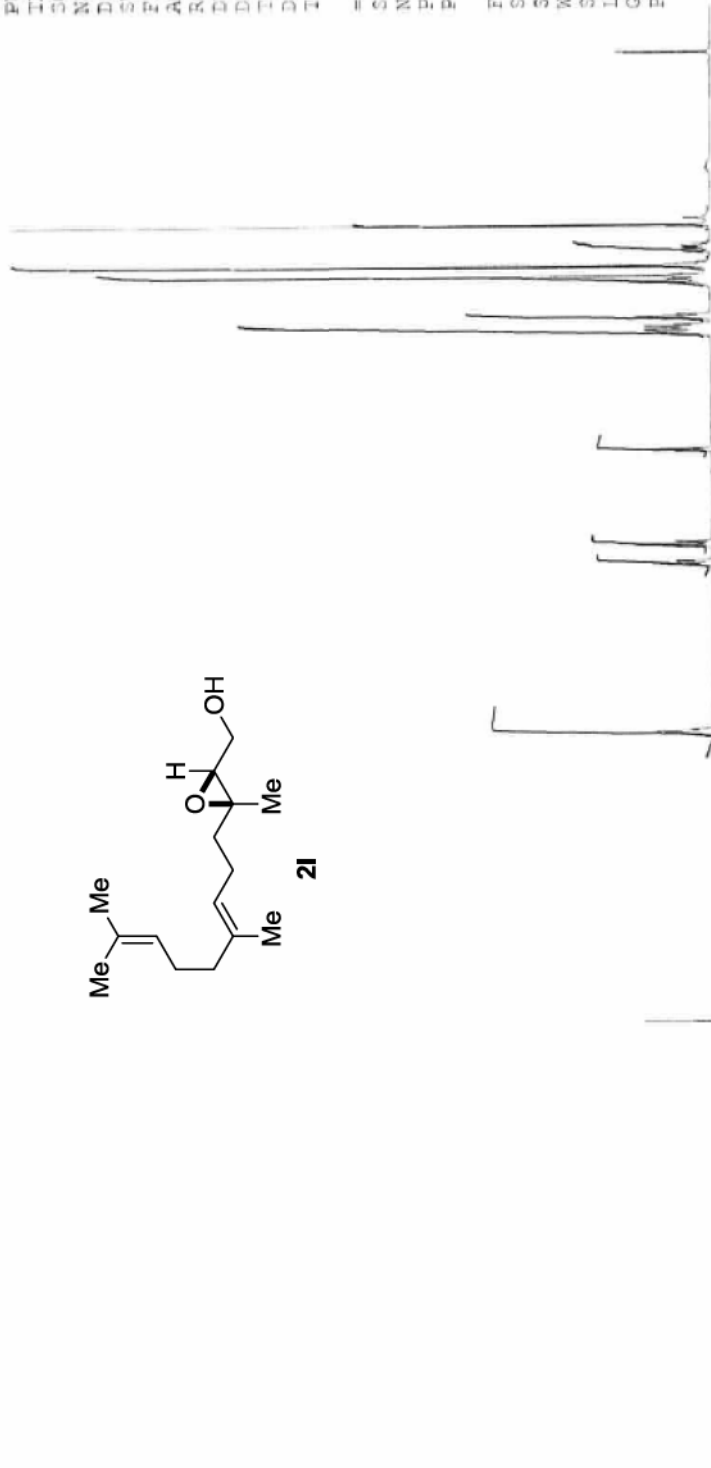

10 9 8 7 6 5 4 3 2 1 ppm

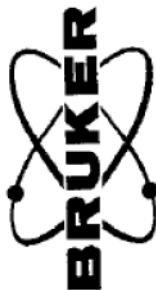

Current Data Parameters  
NAME cw450a-13C  
EXPNO 1  
PROCNO 1

F2 - Acquisition Parameters  
Date\_ 20130926  
Time 18.29  
INSTRUM spect  
PROBHD 5 mm PATAI 1H/  
PULPROG zgdc  
TD 178568  
SOLVENT CDCl3  
NS 721  
DS 0  
SWH 32894.738 Hz  
FIDRES 0.184214 Hz  
AQ 2.7142336 sec  
RG 196.79  
DW 15.200 usec  
DE 10.00 usec  
TE 296.1 K  
D1 1.00000000 sec  
D11 0.03000000 sec  
TDO 1

CHANNEL f1  
SFO1 125.7703648 MHz  
NUC1 13C  
P1 14.00 usec  
PLW1 170.0000000 W

CHANNEL f2  
SFO2 500.1320005 MHz  
NUC2 1H  
CPDPRG2 waltz16  
PCPD2 90.00 usec  
PLW2 12.19999981 W  
PLW12 0.20893000 W

F2 - Processing Parameters  
SI 131072  
SF 125.7577698 MHz  
WDW EM  
SSB 0  
LB 1.00 Hz  
GB 0  
PC 1.40

63.01  
61.62  
61.33  
39.81  
38.67  
26.80  
25.89  
23.76  
17.83  
16.94  
16.14

135.98  
131.61  
124.36  
123.37

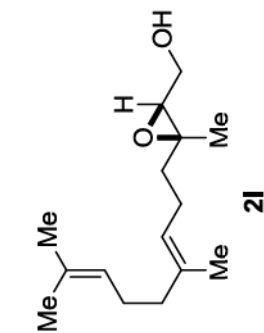

220 200 180 160 140 120 100 80 60 40 20 0 ppm

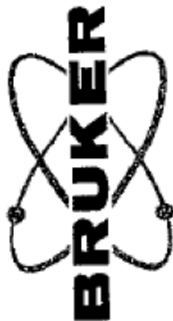

Current Data Parameters  
cw460a

NAME 1  
EXPNO 1  
PROCNO 1

F2 - Acquisition Parameters  
Date\_ 20131004  
Time 18.08

INSTRUM spect  
PROBHD 5 mm PATXI 1H/  
PULPROG zg  
TD 59998  
SOLVENT CDCl3  
NS 8  
DS 0  
SWH 10000.000 Hz  
FIDRES 0.166672 Hz  
AQ 2.999001 sec  
RG 31.72  
DW 50.000 usec  
DE 10.00 usec  
TE 295.2 K  
D1 5.0000000 sec  
TD0 1

CHANNEL f1  
SFO1 500.1330885 MHz  
NUC1 1H  
P1 8.00 usec  
PLW1 12.19999981 W

F2 - Processing parameters  
SI 65536  
SF 500.1300075 MHz  
WDW EM  
SSB 0  
LB 0.30 Hz  
GB 0  
PC 1.00

6.744  
6.741  
6.729  
6.726  
6.715  
6.712  
5.143  
5.140  
4.207  
4.193  
4.178  
4.164  
3.806  
2.982  
2.973  
2.959  
2.280  
2.266  
2.251  
2.125  
2.110  
2.095  
2.081  
1.829  
1.827  
1.742  
1.731  
1.714  
1.703  
1.690  
1.686  
1.673  
1.622  
1.513  
1.499  
1.495  
1.486  
1.481  
1.471  
1.306  
1.303  
1.292  
1.278

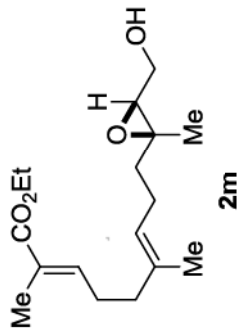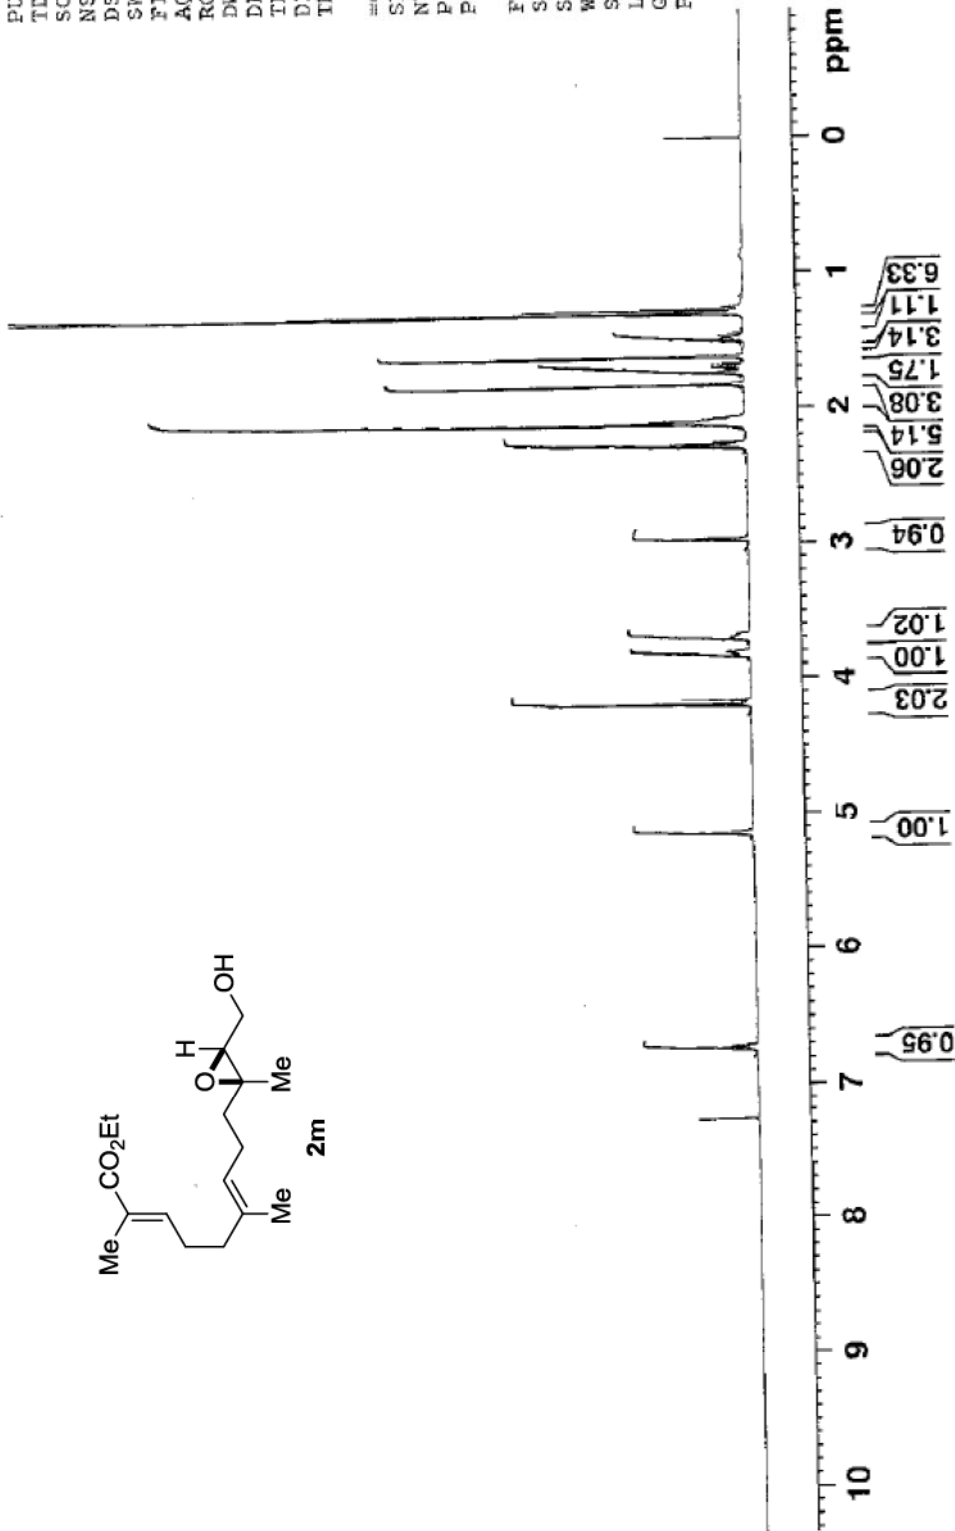

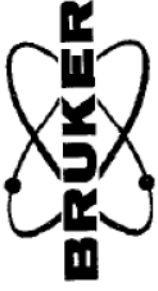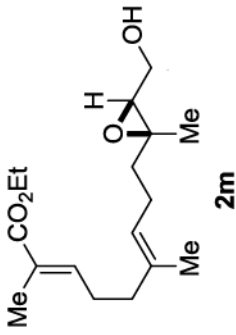

2m

Current Data Parameters  
 NAME cw460a\_13C  
 EXPNO 1  
 PROCNO 1

F2 -- Acquisition Parameters  
 Date\_ 20131004  
 Time 19.00  
 INSTRUM spect  
 PROBHD 5 mm PATXI 1H/  
 PULPROG zgpg  
 TD 178568  
 SOLVENT CDC13  
 NS 704  
 DS 0  
 SWH 32894.738 Hz  
 FIDRES 0.184214 Hz  
 AQ 2.7142336 sec  
 RG 196.79  
 DW 15.200 usec  
 DE 10.00 usec  
 TE 296.1 K  
 D1 1.00000000 sec  
 D11 0.03000000 sec  
 TD0 1

CHANNEL f1  
 SFO1 125.7703648 MHz  
 NUC1 13C  
 P1 14.00 usec  
 PLW1 170.0000000 W

CHANNEL f2  
 SFO2 500.1320005 MHz  
 NUC2 1H  
 CPDPRG[2] waltz16  
 PCPD2 90.00 usec  
 PLW2 12.19999981 W  
 PLW12 0.20893000 W

F2 - Processing parameters  
 SI 131072  
 SF 125.7577730 MHz  
 WDW EM  
 SSB 0  
 LB 0  
 GB 1.00 Hz  
 PC 1.40

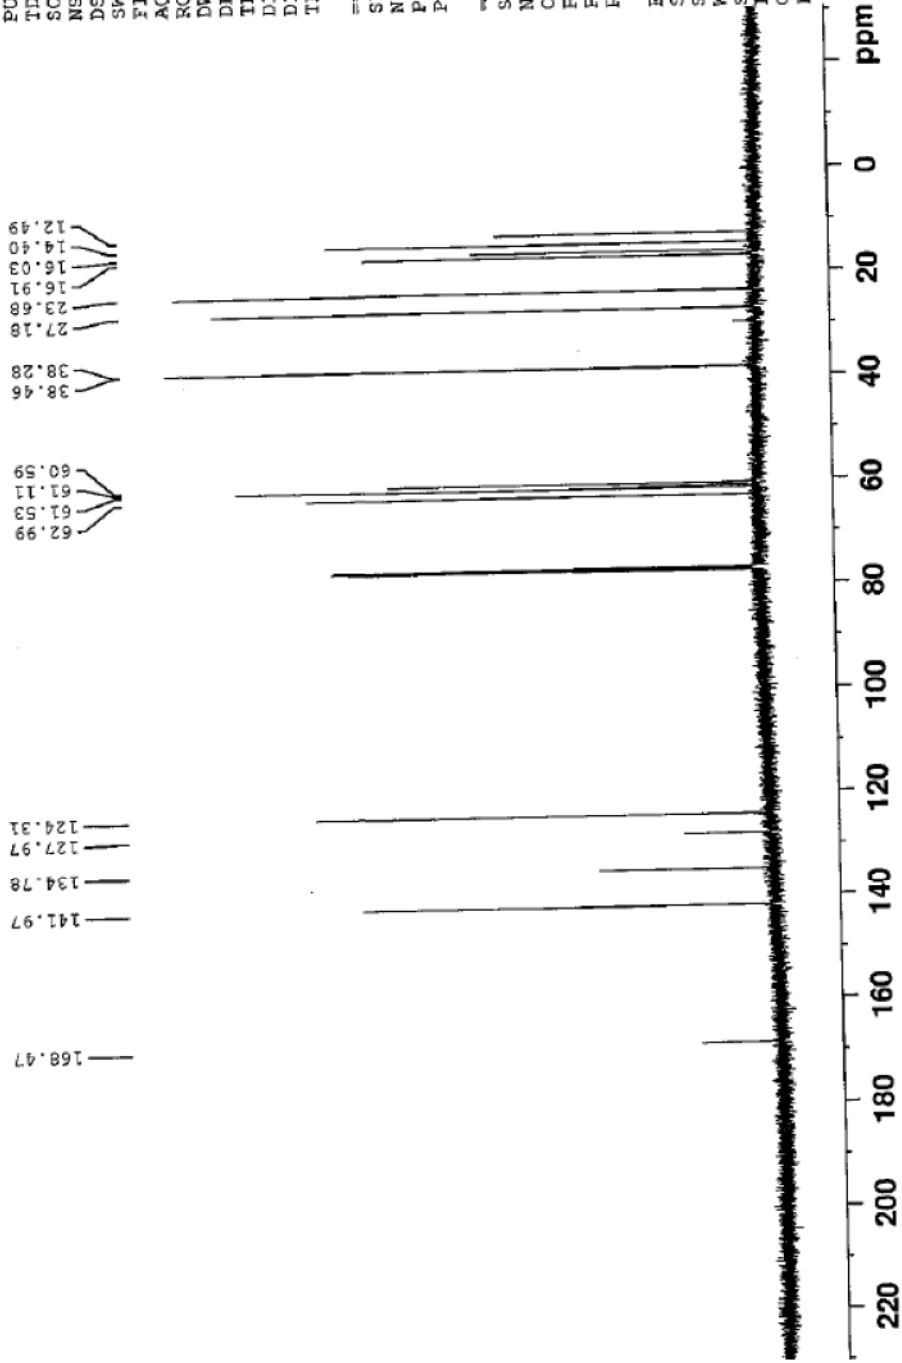



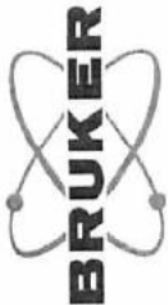

Current Data Parameters  
 NAME CW354a  
 EXPNO 1  
 PROCNO 1

F2 - Acquisition Parameters

Date\_ 20130719  
 Time 13.03  
 INSTRUM spect  
 PROBHD 5 mm PAXI 1H/  
 PULPROG zg  
 ID 59998  
 SOLVENT CDC13  
 NS 8  
 DS 0  
 SWH 10000.000 Hz  
 FIDRES 0.166672 Hz  
 AQ 2.9999001 sec  
 RG 52.86  
 DW 50.000 usec  
 DE 10.00 usec  
 TE 295.2 K  
 D1 5.00000000 sec  
 ID0 1

===== CHANNEL f1 =====  
 SF01 500.130085 MHz  
 NUC1 1H  
 P1 8.00 usec  
 PL1 12.19999981 W

F2 - Processing parameters  
 SI 65536  
 SF 500.1300076 MHz  
 EM  
 WDW 0  
 SSB 0  
 LB 0.30 Hz  
 GE 0  
 PC 1.00

1.964  
1.959  
2.957  
2.951  
2.851  
2.845  
2.841  
2.835  
2.716  
2.708  
2.706  
2.697  
1.720  
1.709  
1.705  
1.702  
1.699  
1.696  
1.677  
1.673  
1.656  
1.652  
1.647  
1.640  
1.631  
1.624  
1.613  
1.598  
1.582  
1.568  
1.561  
1.542  
1.516  
1.510  
1.460  
1.438  
1.419  
1.392  
1.320  
1.312  
1.304  
1.297  
1.281  
1.255

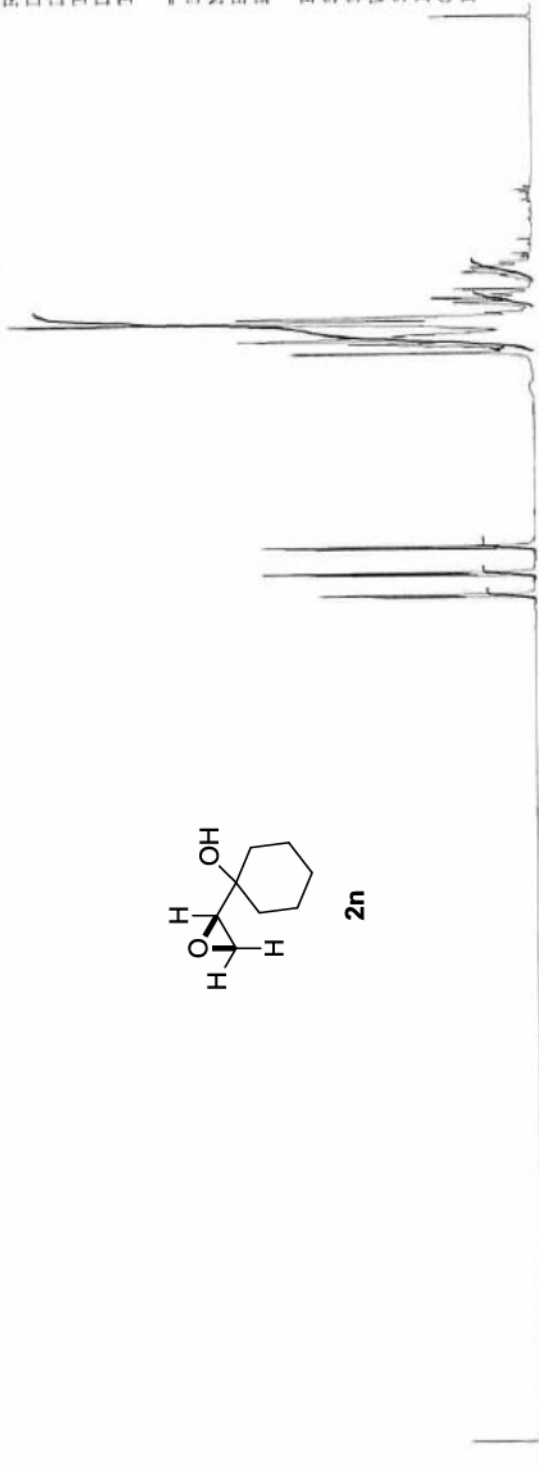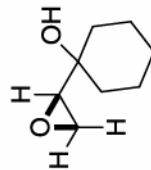

7.0 6.5 6.0 5.5 5.0 4.5 4.0 3.5 3.0 2.5 2.0 1.5 1.0 0.5 ppm

1.00  
1.07  
1.07  
10.26  
1.23  
1.26

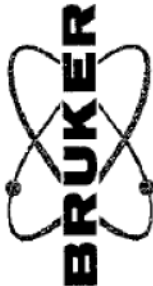

Current Data Parameters  
NAME cw354a-13C  
EXPNO 1  
PROCNO 1

F2 - Acquisition Parameters  
Date\_ 20130719  
Time 13.15  
INSTRUM spect  
PROBHD 5 mm PAIXI 1H/  
PULPROG zgpg  
TD 178568  
SOLVENT CDCl3  
NS 86  
DS 0  
SWH 32894.738 Hz  
FIDRES 0.184214 Hz  
AQ 2.7142336 sec  
RG 196.79  
DW 15.200 usec  
DE 10.00 usec  
TE 295.9 K  
D1 3.0000000 sec  
D11 0.0300000 sec  
TDO 1

===== CHANNEL f1 =====  
SFO1 125.7703648 MHz  
NUC1 13C  
P1 14.00 usec  
PLW1 170.0000000 W

===== CHANNEL f2 =====  
SFO2 500.1320005 MHz  
NUC2 1H  
CPDPRG2 waltz16  
PCPD2 90.00 usec  
PLW2 12.1999981 W  
PLW12 0.20893000 W

F2 - Processing parameters  
SI 131072  
SF 125.7577713 MHz  
WDW EM  
SSB 0  
LB 1.00 Hz  
GB 0  
PC 1.40

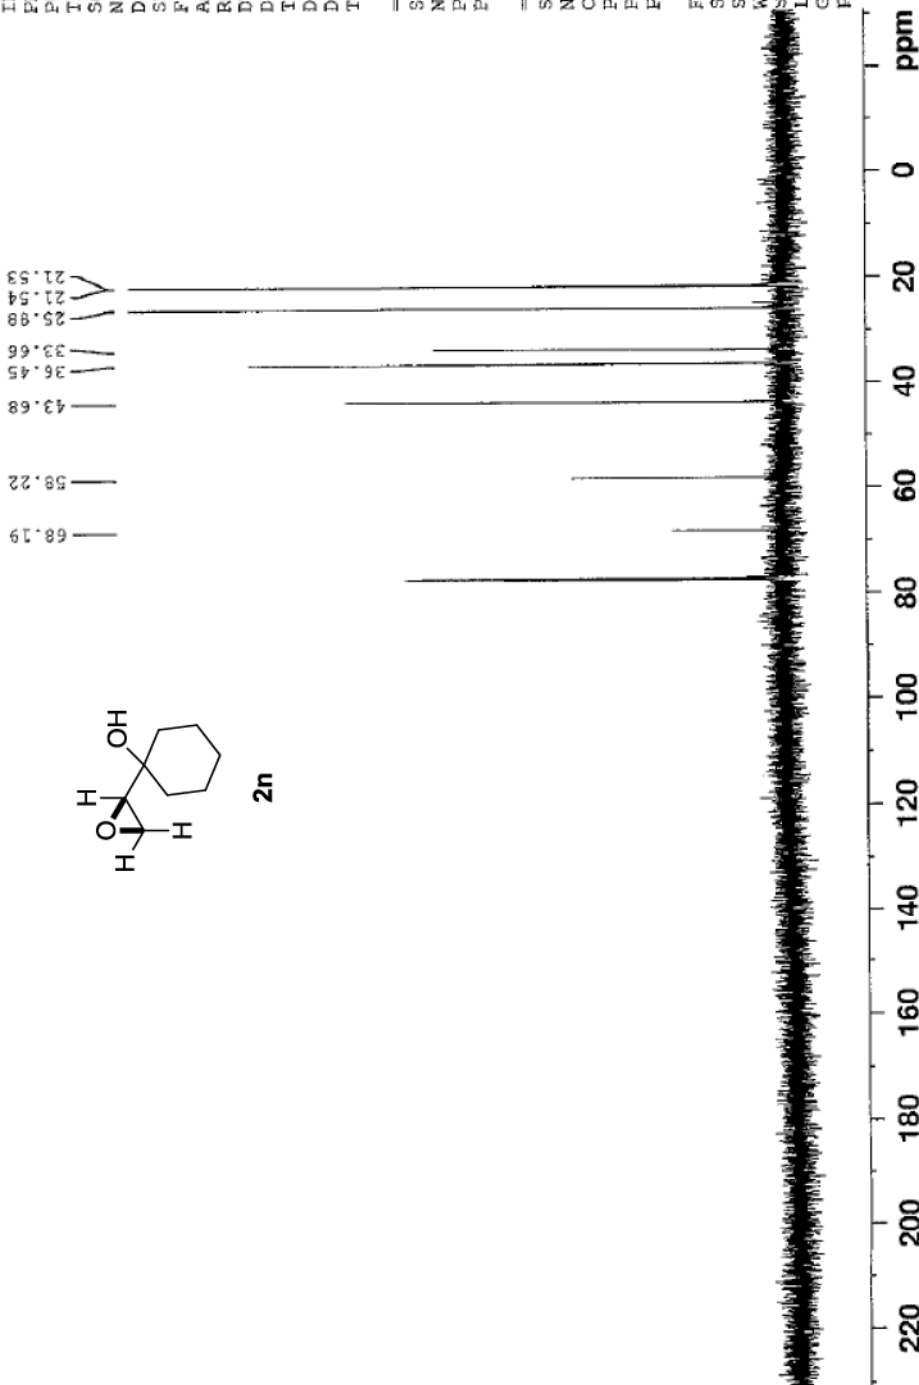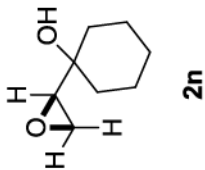

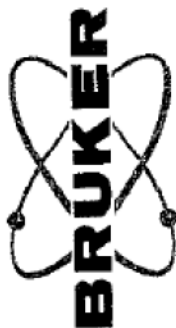

Current Data Parameters  
 NAME cw380a  
 EXPNO 1  
 PROCNO 1

F2 - Acquisition Parameters  
 Date\_ 20130707  
 Time 16.40  
 INSTRUM spect  
 PROBHD 5 mm PATXI 1H/  
 PULPROG zg  
 TD 59998  
 SOLVENT CDCl3  
 NS 8  
 DS 0  
 SWH 10000.000 Hz  
 FIDRES 0.166672 Hz  
 AQ 2.9999001 sec  
 RG 126.24  
 DW 50.000 usec  
 DE 10.00 usec  
 TE 295.7 K  
 D1 5.0000000 sec  
 TD0 1

===== CHANNEL f1 =====  
 SFO1 500.1330885 MHz  
 NUC1 1H  
 P1 8.00 usec  
 PLW1 12.19999981 W

F2 - Processing parameters  
 SI 65536  
 SF 500.1300119 MHz  
 WDW EM  
 SSB 0  
 LB 0.30 Hz  
 GB 0  
 PC 1.00

2.996  
2.993  
2.992  
2.694  
2.689  
1.772  
1.604  
1.590  
1.584  
1.578  
1.534  
1.530  
1.523  
1.517  
1.506  
1.504  
1.491  
1.480  
1.464  
1.449  
1.436  
1.424  
1.407  
1.355  
1.329  
1.322  
1.302  
1.253  
1.234  
0.913  
0.911

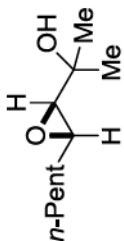

2o

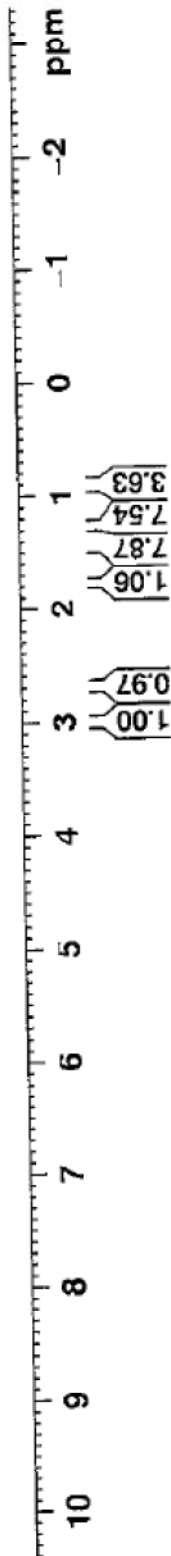

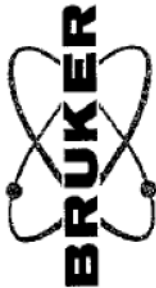

Current Data Parameters  
NAME cw380a-13C  
EXNO 1  
PROCNO 1

F2 - Acquisition Parameters

Date\_ 20130707  
Time 17.43  
INSTRUM spect  
PROBHD 5 mm PAXI 1H/  
PULPROG zgdc  
TD 178568  
SOLVENT CDCl3  
NS 295  
DS 0  
SMH 32894.738 Hz  
FIDRES 0.184214 Hz  
AQ 2.7142336 sec  
RG 196.79  
DW 15.200 usec  
DE 10.00 usec  
TE 296.2 K  
D1 3.0000000 sec  
D11 0.0300000 sec  
TDO 1

CHANNEL f1  
SFO1 125.7703648 MHz  
NUC1 13C  
P1 14.00 usec  
PLW1 170.0000000 W

CHANNEL f2  
SFO2 500.1320005 MHz  
NUC2 1H  
CPDPRG[2] waltz16  
PCPD2 90.00 usec  
PLW2 12.1999981 W  
PLW12 0.20893000 W

F2 - Processing parameters  
SI 131072  
SF 125.7577710 MHz  
WDW EM  
SSB 0  
LB 0  
GB 0  
PC 1.40

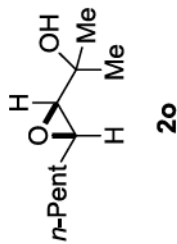

60.99  
58.79  
96.42  
96.28  
96.24  
96.10  
99.69  
102.22  
102.69  
104.10  
14.10

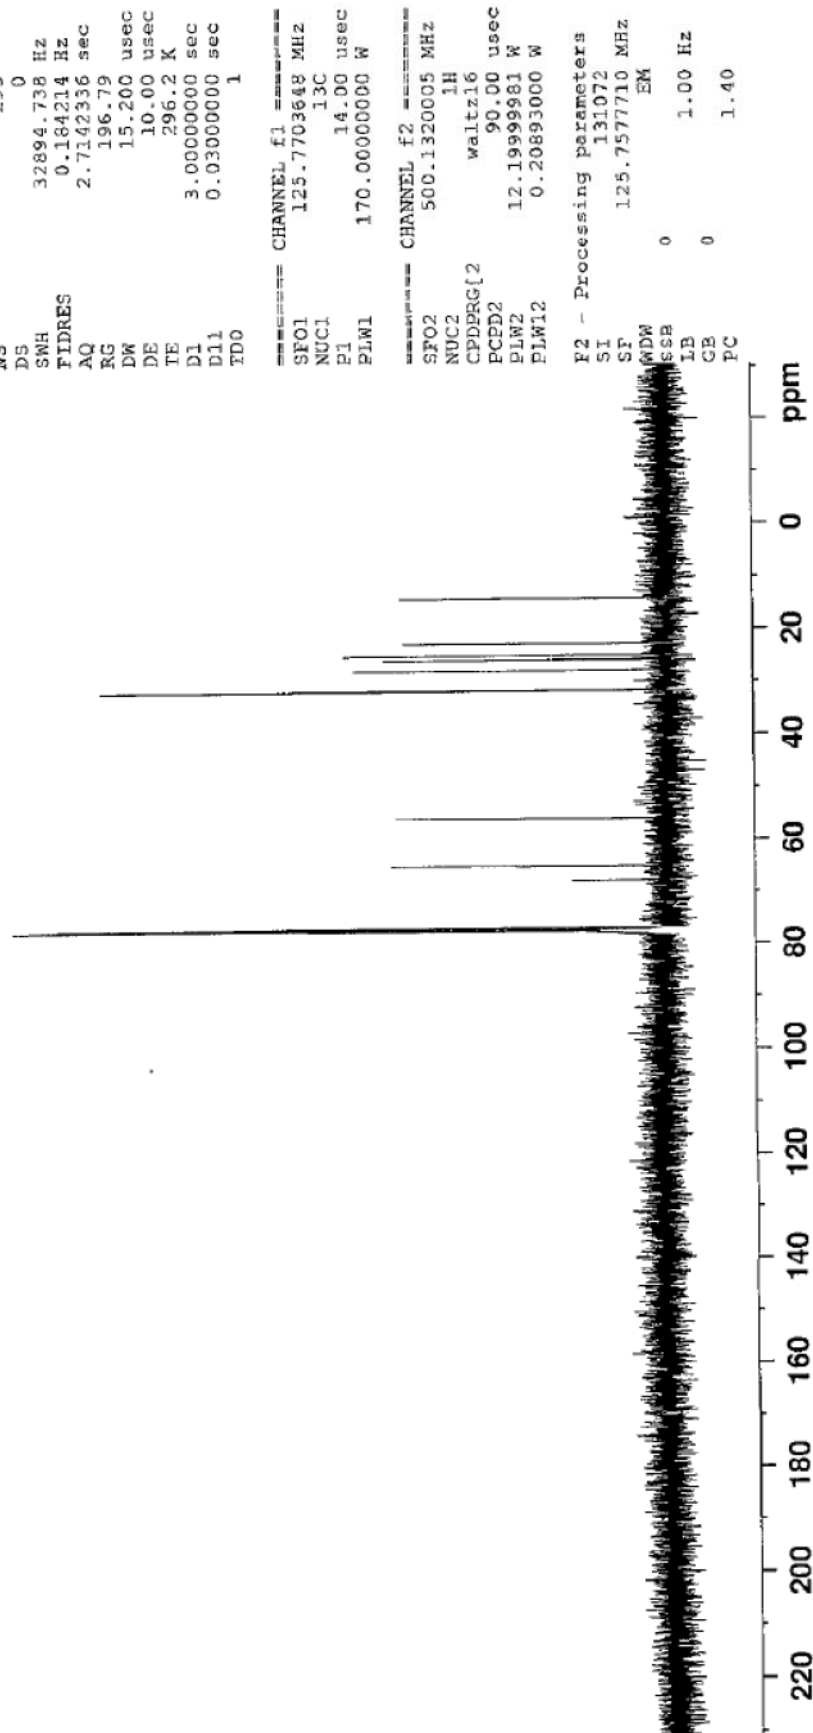

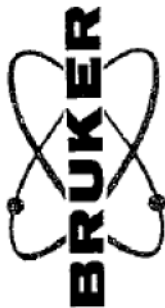

Current Data Parameters  
 NAME cw405a2  
 EXPNO 1  
 PROCNO 1

F2 - Acquisition Parameters  
 Date\_ 20130723  
 Time 15.16  
 INSTRUM spect  
 PROBD 5 mm PATXI 1H/  
 PULPROG zg  
 TD 59998  
 SOLVENT CDCl3  
 NS 8  
 DS 0  
 SWH 10000.000 Hz  
 FIDRES 0.166672 Hz  
 AQ 2.9999001 sec  
 RG 31.72  
 DW 50.000 usec  
 DE 10.00 usec  
 TE 295.4 K  
 D1 5.00000000 sec  
 TD0 1

CHANNEL f1  
 SF01 500.130885 MHz  
 NUC1 1H  
 P1 8.00 usec  
 PLW1 12.19999981 W  
 F2 - Processing parameters  
 SI 65536  
 SF 500.1300075 MHz  
 EM  
 WDW 0  
 SSB 0 0.30 Hz  
 LB 0  
 GB 0  
 PC 1.00

2.961  
2.955  
2.953  
2.947  
2.822  
2.816  
2.811  
2.806  
2.724  
2.716  
2.714  
2.706  
1.675  
1.662  
1.647  
1.631  
1.616  
1.585  
1.569  
1.540  
1.544  
1.526  
0.982  
0.967  
0.952  
0.945  
0.929

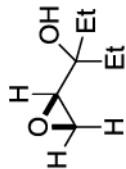

2p

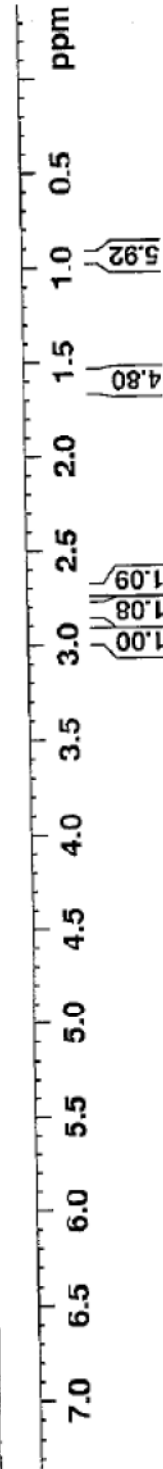

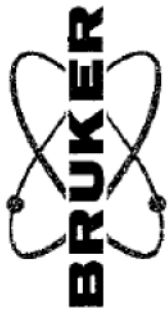

Current Data Parameters  
NAME cw405a2-13C  
EXPNO 1  
PROCNO 1

F2 - Acquisition Parameters  
Date\_ 20130723  
Time\_ 15.29  
INSTRUM spect  
PROBHD 5 mm PATXI 1H/  
PULPROG zgdc  
TD 178568  
SOLVENT CDCl3  
NS 151  
DS 0  
SWH 32894.738 Hz  
FIDRES 0.184214 Hz  
AQ 2.7142336 sec  
RG 196.79  
DW 15.200 usec  
DE 10.00 usec  
TE 295.8 K  
D1 1.0000000 sec  
D11 0.0300000 sec  
TDO 1

==== CHANNEL f1 =====  
SFO1 125.7703648 MHz  
NUC1 13C  
P1 14.00 usec  
PLW1 170.0000000 W

==== CHANNEL f2 =====  
SFO2 500.1320005 MHz  
NUC2 1H  
CPDPRG[2] waltz16  
PCPD2 90.00 usec  
PLW2 12.19999981 W  
PLW12 0.20893000 W

F2 - Processing parameters  
SI 131072  
SF 125.7577731 MHz  
WDW EM  
SSB 0  
LB 0  
GB 0  
PC 1.40

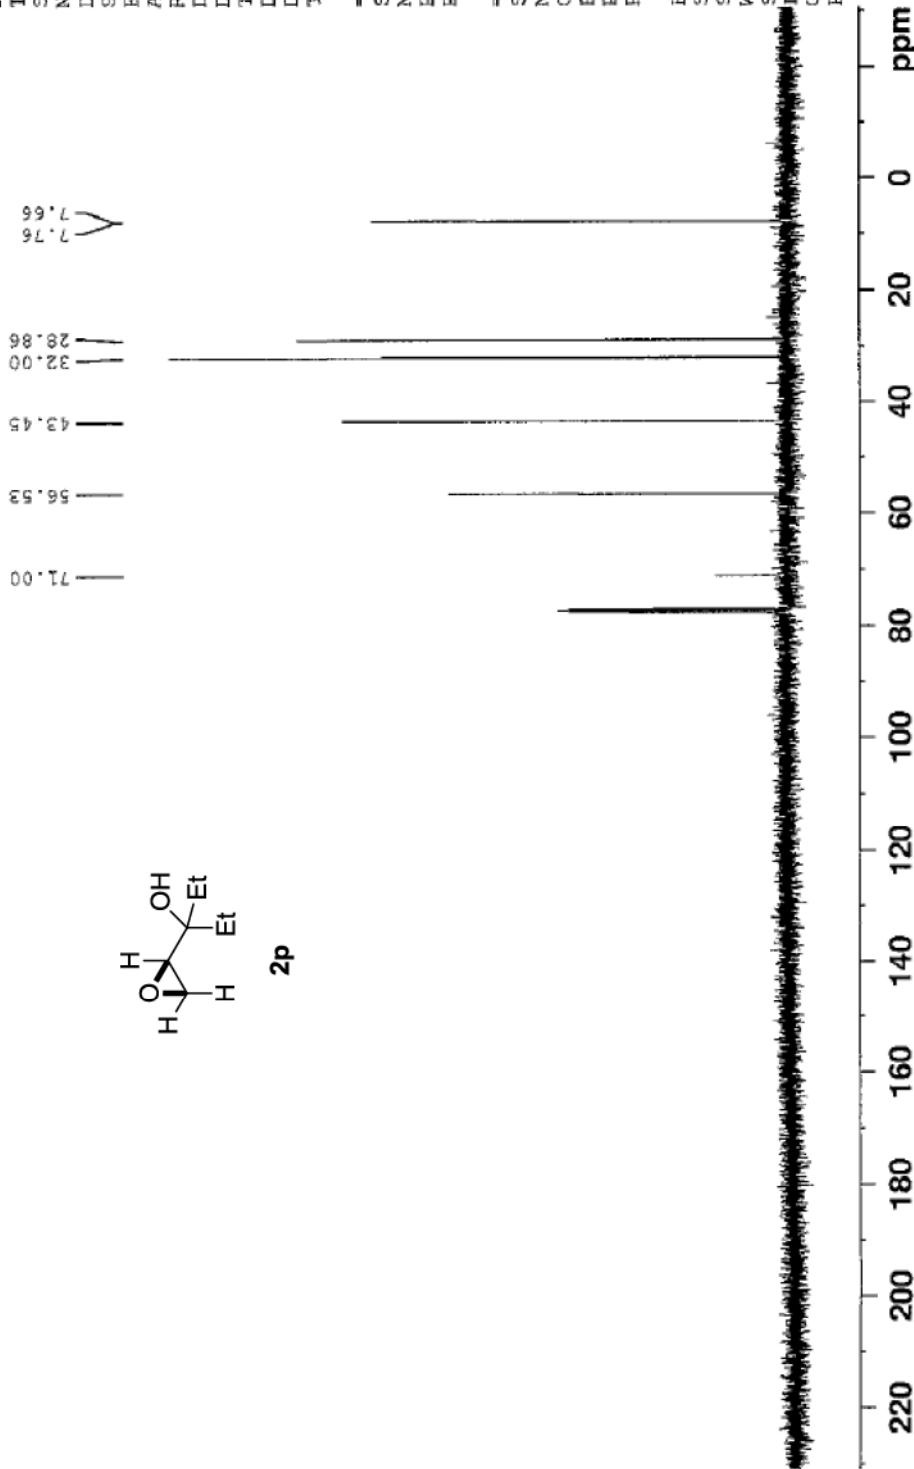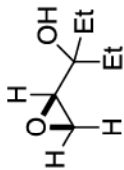

2p

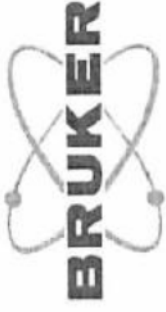

Current Data Parameters  
 NAME cw461a-1  
 EXPNO 1  
 PROCNO 1

F2 - Acquisition Parameters  
 Date\_ 20131006  
 Time 10.33  
 INSTRUM spect  
 PROHD 5 mm PAIXI 1H/  
 PULPROG zgpg30

ID 59998  
 SOLVENT CDC13  
 NS 16  
 DS 0  
 SWH 13000.000 Hz  
 FIDRES 0.166672 Hz  
 AQ 2.9399001 sec  
 RG 26.8  
 DW 50.000 usec  
 DE 10.00 usec  
 TE 294.2 K  
 D1 5.0000000 sec  
 TDC 1

===== CHANNEL f1 =====  
 SF01 500.1330885 MHz  
 NUC1 1H  
 P1 8.00 usec  
 PLW1 10.19999961 W

F2 - Processing parameters  
 SI 65536  
 SF 500.1300066 MHz  
 EM  
 WDW 0  
 SGB 0  
 LB 0.30 Hz  
 GB 0  
 PC 1.00

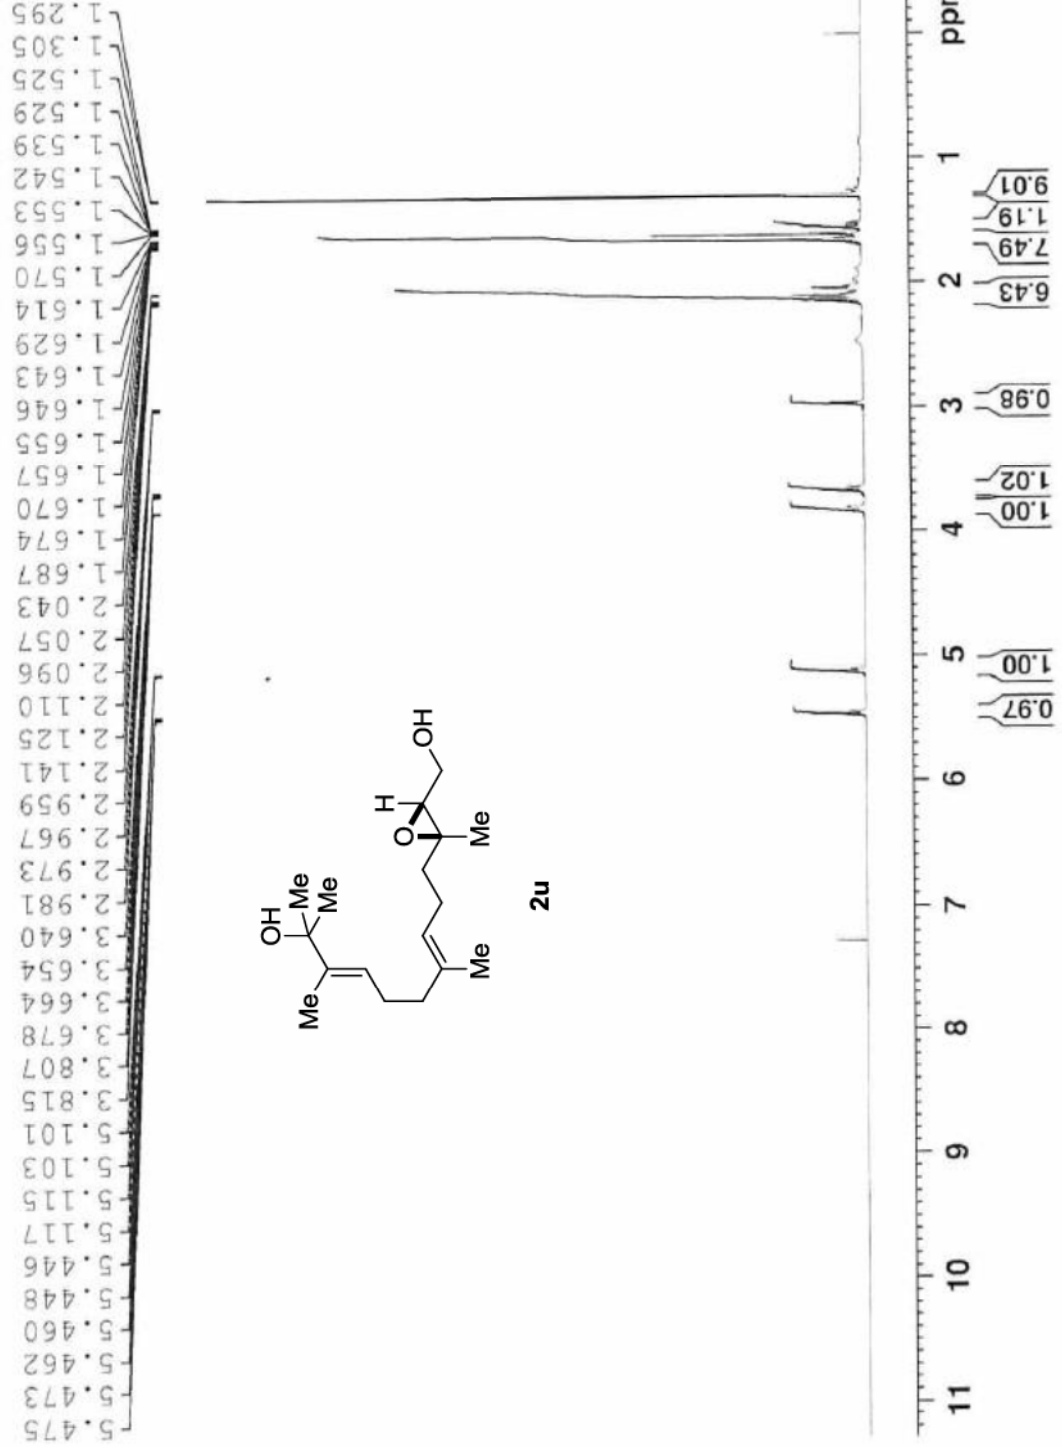

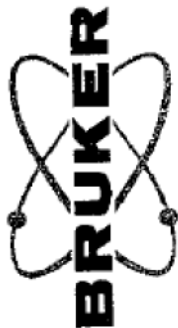

Current Data Parameters  
NAME cw461a-13C  
EXPNO 1  
PROCNO 1

F2 - Acquisition Parameters

Date\_ 20131006  
Time 11.33  
INSTRUM spect  
PROBHD 5 mm PATXI 1H/  
FULPROG zgdc  
TD 178568  
SOLVENT CDCl3  
NS 845  
DS 0  
SWH 32894.738 Hz  
FIDRES 0.184214 Hz  
AQ 2.7142336 sec  
RG 196.79  
DW 15.200 usec  
DE 10.00 usec  
TE 296.2 K  
D1 1.00000000 sec  
D11 0.03000000 sec  
TDO 1

CHANNEL f1  
SFO1 125.7703648 MHz  
NUC1 13C  
P1 14.00 usec  
PLW1 170.00000000 W

CHANNEL f2  
SFO2 500.1320005 MHz  
NUC2 1H  
CPDPRG[2] waltz16  
PCPD2 90.00 usec  
PLW2 12.19999961 W  
PLW12 0.20893000 W

F2 - Processing parameters  
SI 131072  
SF 125.7577736 MHz  
WDW EM  
SSB 0  
LB 1.00 Hz  
GB 0  
FC 1.40

141.36  
135.38  
123.77  
121.66  
73.66  
63.04  
61.49  
61.32  
39.43  
38.43  
29.01  
26.20  
23.67  
16.78  
16.06  
12.96

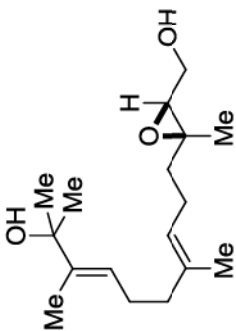

2u

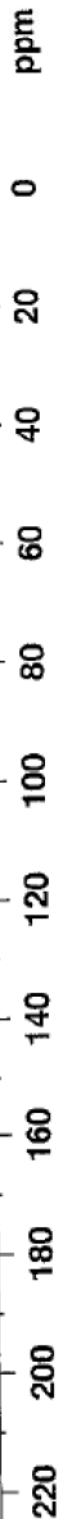



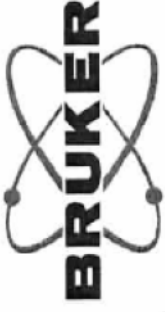

Current Data Parameters  
NAME cw483g  
EXPNO 1  
PROCNO 1

F2 - Acquisition Parameters  
Date\_ 20131023  
Time 18.14  
INSTRUM spect  
PROBHD 5 mm PATXI 1H/  
PULPROG zg  
TD 59998  
SOLVENT CDCl3  
NS 16  
DS 0  
SWH 10000.000 Hz  
FIDRES 0.166672 Hz  
AQ 2.9999001 sec  
RG 71.78  
DW 50.000 usec  
DE 10.00 usec  
TE 295.8 K  
D1 5.00000000 sec  
IDC 1

CHANNEL f1  
SFO1 500.1330885 MHz  
NUC1 1H  
P1 8.00 usec  
PLW1 12.19999981 W  
F2 - Processing parameters  
SI 65536  
SF 500.1300111 MHz  
WDW EM  
SSB 0  
LB 0.30 Hz  
GB 0  
PC 1.00

5.340  
5.115  
3.965  
3.957  
3.822  
3.818  
3.814  
3.810  
3.690  
3.686  
3.676  
3.672  
2.979  
2.973  
2.970  
2.965  
2.959  
2.957  
2.951  
2.141  
2.127  
2.113  
2.096  
2.053  
2.038  
2.023  
1.679  
1.667  
1.663  
1.651  
1.614  
1.591  
1.538  
1.525  
1.520  
1.511  
1.506  
1.497  
1.492  
1.299  
1.255  
0.909  
0.895  
0.881

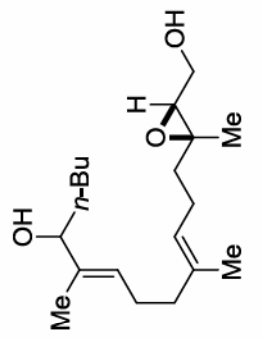

2v

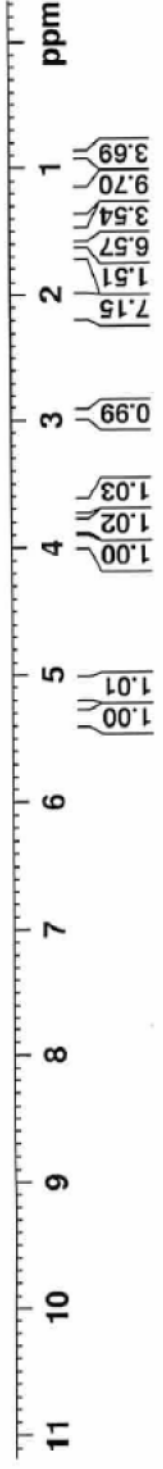

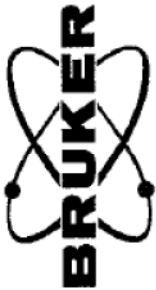

Current Data Parameters  
 NAME cw483g-13C  
 EXENO 1  
 PROCNO 1

F2 - Acquisition Parameters

Date\_ 20131023  
 Time 18.58  
 INSTRUM spect  
 PROBHD 5 mm PATXI 1H/  
 PULPROG zgdc  
 TD 178568  
 SFO1 125.7703648 MHz  
 SF 125.7703648 MHz  
 NS 606  
 DS 0  
 SWH 32894.738 Hz  
 FIDRES 0.184214 Hz  
 AQ 2.7142336 sec  
 RG 196.79  
 DW 15.200 usec  
 DE 10.00 usec  
 TE 297.2 K  
 D1 1.00000000 sec  
 D11 0.03000000 sec  
 TDO 1

CHANNEL f1  
 SFO1 125.7703648 MHz  
 NUC1 13C  
 PL1 14.00 usec  
 PLW1 170.0000000 W

CHANNEL f2  
 SFO2 500.1320005 MHz  
 NUC2 1H  
 CPDPRG[2] waltz16  
 PCPD2 90.00 usec  
 PLW2 12.19999981 W  
 PLW12 0.20893000 W

F2 - Processing parameters  
 SI 131072  
 SF 125.7577694 MHz  
 SSB 0  
 LB 1.00 Hz  
 GB 0  
 PC 1.40

137.55  
 137.53  
 139.32  
 135.30  
 126.14  
 126.06  
 123.85  
 78.05  
 78.03  
 62.93  
 61.57  
 61.33  
 61.27  
 38.39  
 38.47  
 38.45  
 34.74  
 34.72  
 29.85  
 28.17  
 25.94  
 25.88  
 23.72  
 23.70  
 22.79  
 16.03  
 16.00  
 16.00  
 14.16  
 14.16  
 11.47  
 11.46

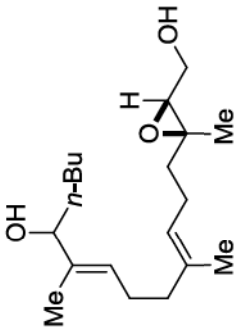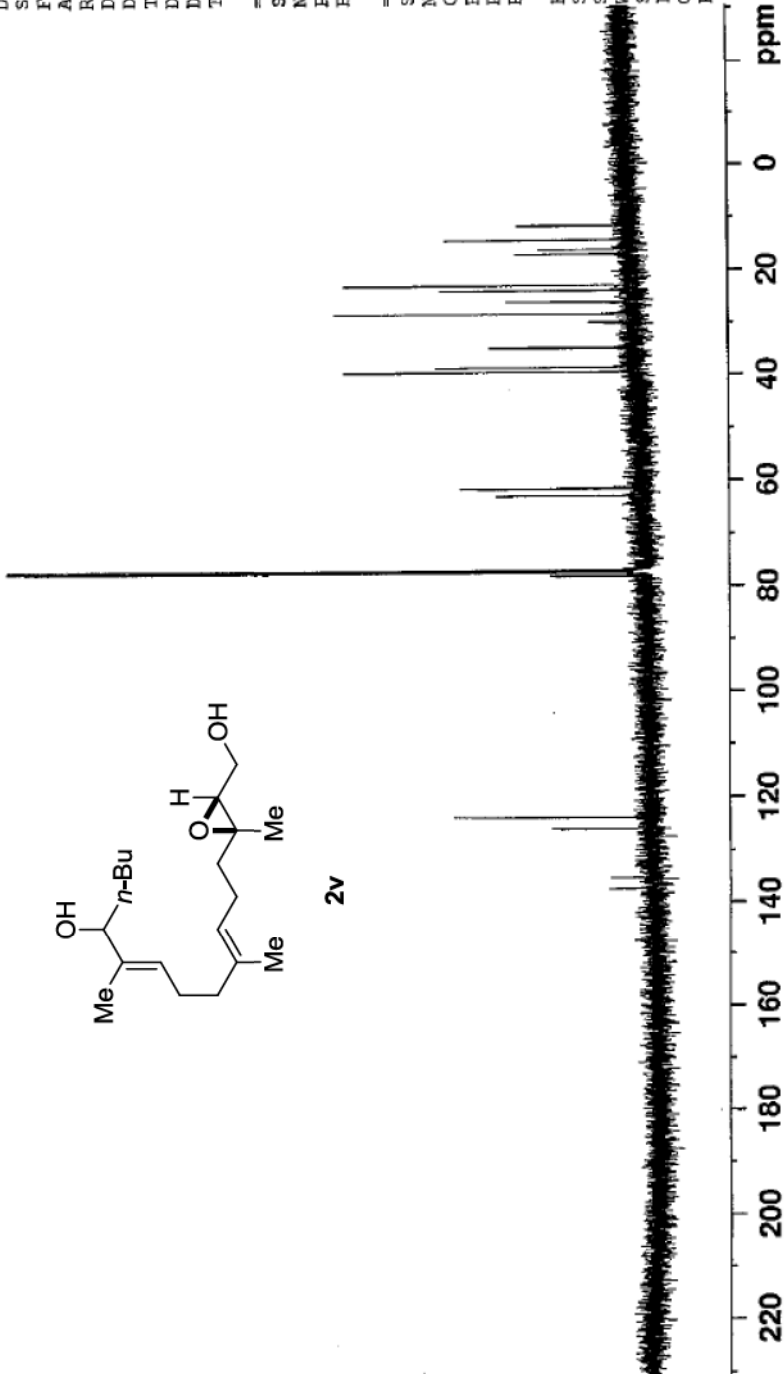

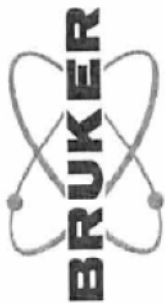

Current Data Parameters  
NAME cw353c  
EXPNO 1  
PROCNO 1

F2 - Acquisition Parameters

Date\_ 20130616  
Time 18.05  
INSTRUM spect  
PROBHD 5 mm PATXI LH/  
PULPROG zg  
TD 59998  
SOLVENT CDC13  
NS 24  
DS 0  
SWH 10000.000 Hz  
FIDRES 0.166672 Hz  
AQ 2.9993001 sec  
RG 39.6  
DW 50.000 usec  
DE 10.00 usec  
IE 234.6 K  
DL 7.00000000 sec  
TDC 1

===== CHANNEL f1 =====  
SF01 500.1330885 MHz  
NUC1 1H  
P1 8.00 usec  
PLW1 12.19999881 W

F2 - Processing parameters  
SI 65536  
SF 500.1300086 MHz  
WDW EX  
SSE 0  
LB 0.30 Hz  
GB 0  
PC 1.00

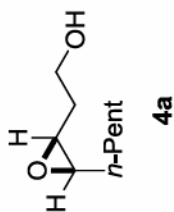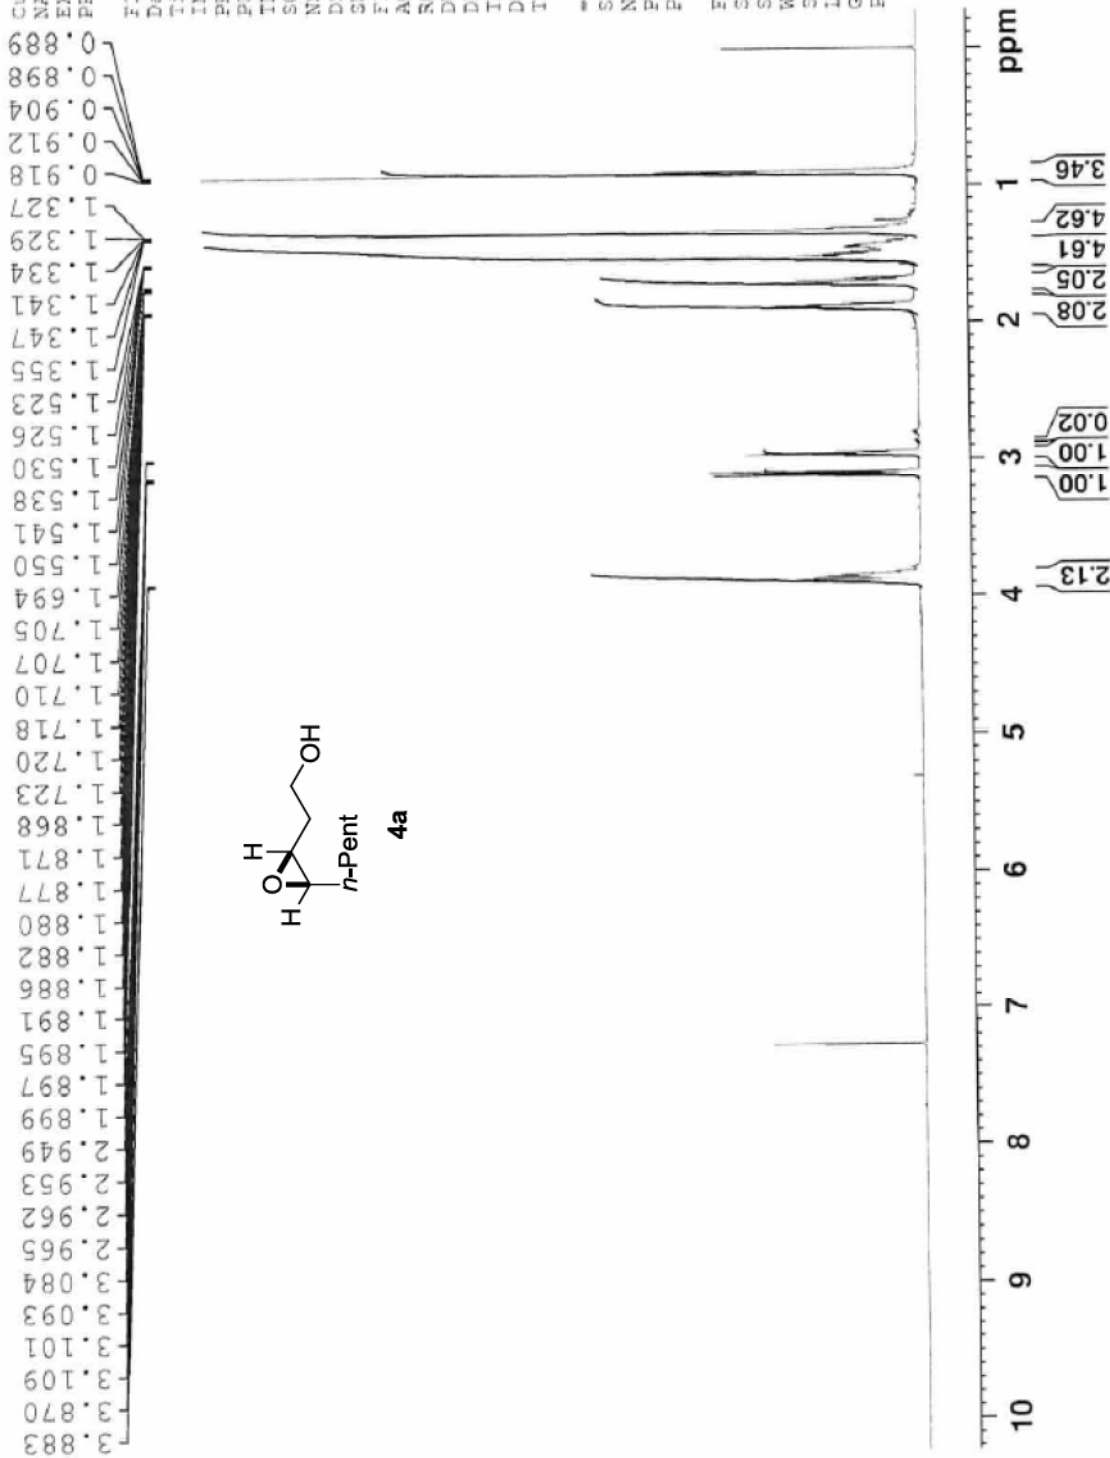

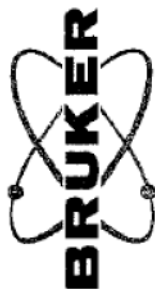

Current Data Parameters  
NAME cw353c-13C  
EXPNO 1  
PROCNO 1

F2 - Acquisition Parameters  
Date\_ 20130616  
Time 18.55  
INSTRUM spect  
PROBHD 5 mm PAXI IH/  
PULPROG zgdc  
TD 178568  
SOLVENT CDCl3  
NS 483  
DS 0  
SWH 32894.738 Hz  
FIDRES 0.184214 Hz  
AQ 2.7142336 sec  
RG 196.79  
DW 15.200 usec  
DE 10.00 usec  
TE 296.1 K  
D1 3.0000000 sec  
D11 0.0300000 sec  
TD0 1

CHANNEL f1  
SFO1 125.7703648 MHz  
NUC1 13C  
P1 14.00 usec  
PLW1 170.0000000 W

CHANNEL f2  
SFO2 500.1320005 MHz  
NUC2 1H  
CPDPRG[2] waltz16  
PCPD2 90.00 usec  
PLW2 12.1999981 W  
PLW12 0.20893000 W

F2 - Processing parameters  
SI 131072  
SF 125.7577747 MHz  
WDW EM  
SSB 0  
LB 1.00 Hz  
GB 0  
PC 1.40

92.09  
56.90  
18.55  
31.79  
30.66  
29.02  
28.28  
22.70  
14.11

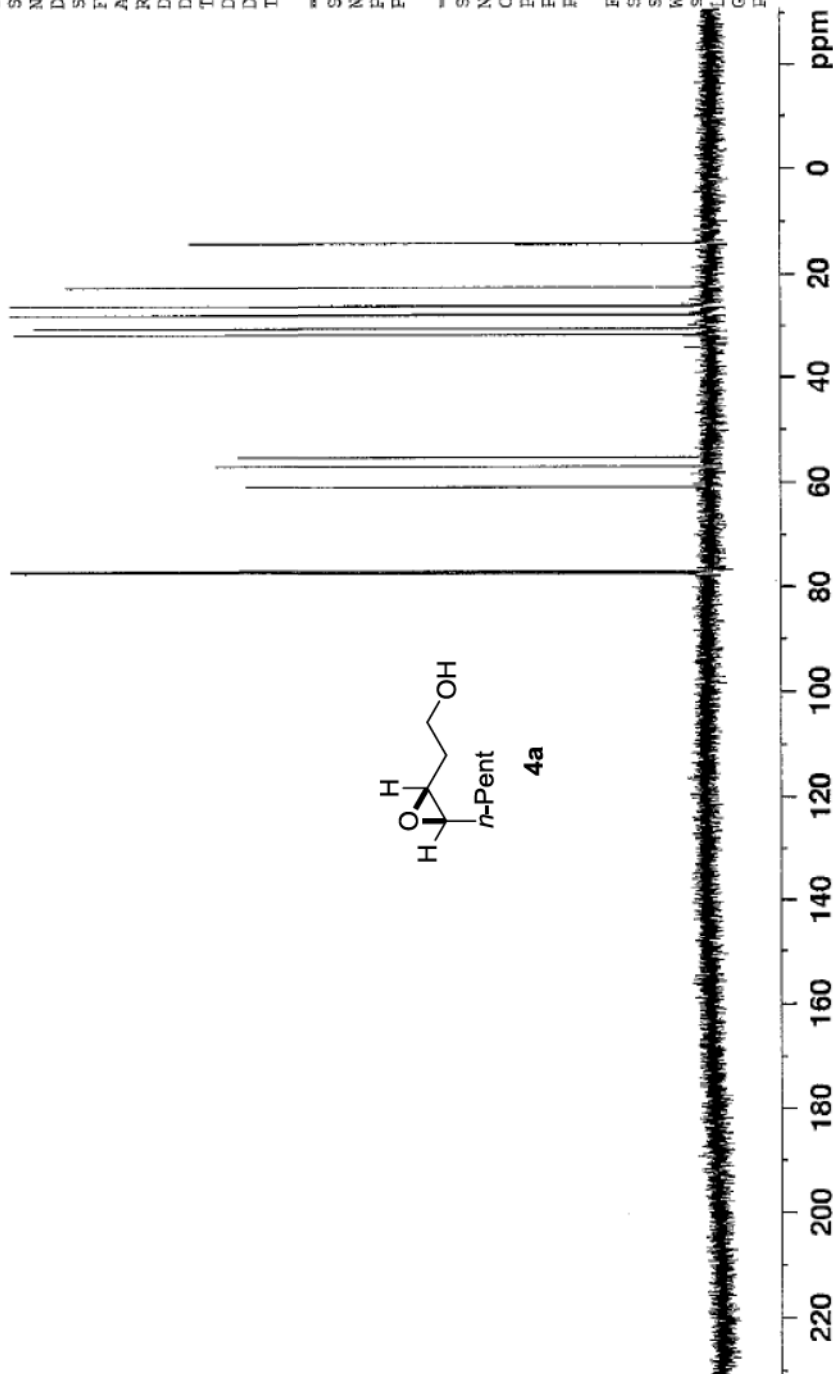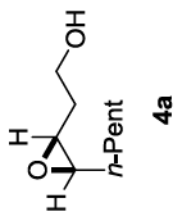

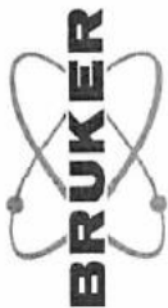

Current Data Parameters  
NAME cw365a2  
EXPNO 1  
PROCNO 1

F2 - Acquisition Parameters  
Date\_ 20130729  
Time 11.07

PROBHD 5 mm PATXI 1H/  
PULPROG zg  
TD 59996  
SOLVENT CDC13  
NS 8  
DS 0  
SWH 10000.000 Hz  
FIDRES 0.166672 Hz  
AQ 2.9399001 sec  
RG 30.11  
DW 50.000 usec  
DE 10.00 usec  
TE 296.1 K  
D1 5.00000000 sec  
ID0 1

CHANNEL f1  
SFO1 500.1330885 MHz  
NUC1 1H  
P1 8.00 usec  
PLW1 12.19999981 W

F2 - Processing Parameters  
SI 65536  
SF 500.1300024 MHz  
WDW EM  
SSB 0  
LB 0.30 Hz  
GB 0  
PC 1.00

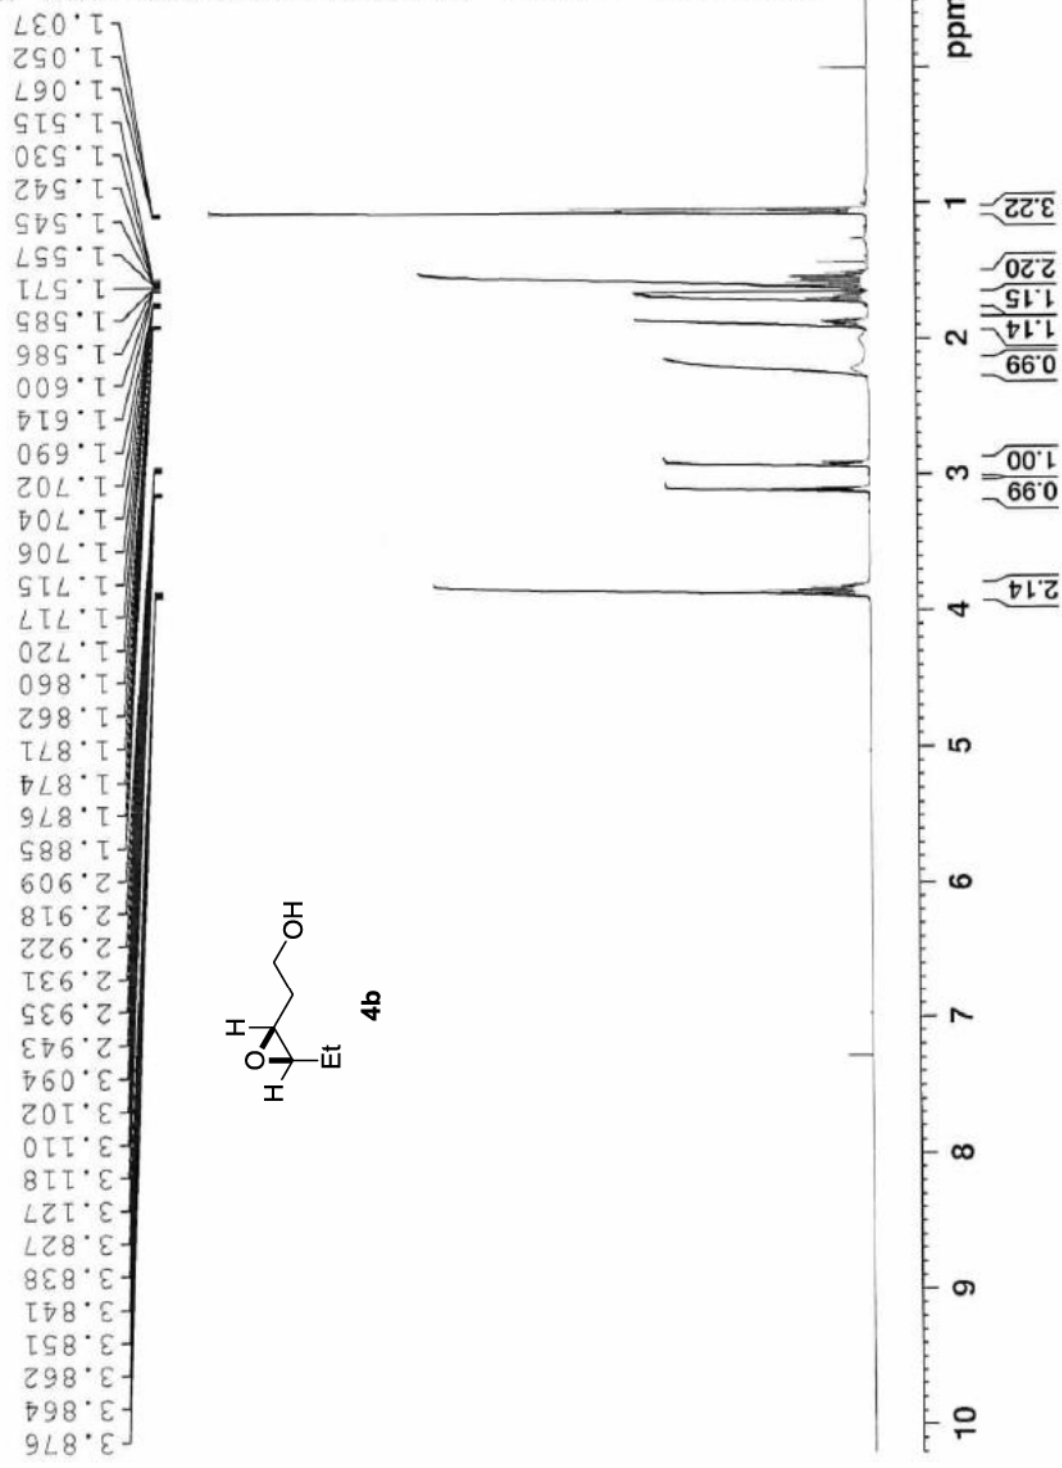

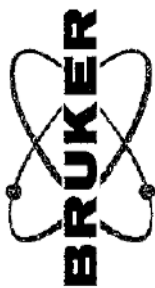

Current Data Parameters  
NAME cw365a2-13C  
EXCNO 1  
PROCNO 1

F2 - Acquisition Parameters  
Date\_ 20130729  
Time 11.30  
INSTRUM spect  
PROBHD 5 mm PATXI LH/  
PULPROG zgdc  
TD 178568  
SOLVENT CDCl3  
NS 293  
DS 0  
SWH 32894.738 Hz  
FIDRES 0.184214 Hz  
AQ 2.7142336 sec  
RG 196.79  
DW 15.200 usec  
DE 10.00 usec  
TE 298.1 K  
D1 1.0000000 sec  
D11 0.0300000 sec  
TD0 1

CHANNEL f1  
SE01 125.7703648 MHz  
NUC1 13C  
P1 14.00 usec  
PLW1 170.0000000 W

CHANNEL f2  
SE02 500.1320005 MHz  
NUC2 1H  
CDEPRG[2] waltz16  
PCPD2 90.00 usec  
PLW2 12.19999981 W  
PLW12 0.20893000 W

F2 - Processing parameters  
SI 131072  
SE 125.7577748 MHz  
WDW EM  
SSB 0  
LB 0  
GB 0  
PC 1.40

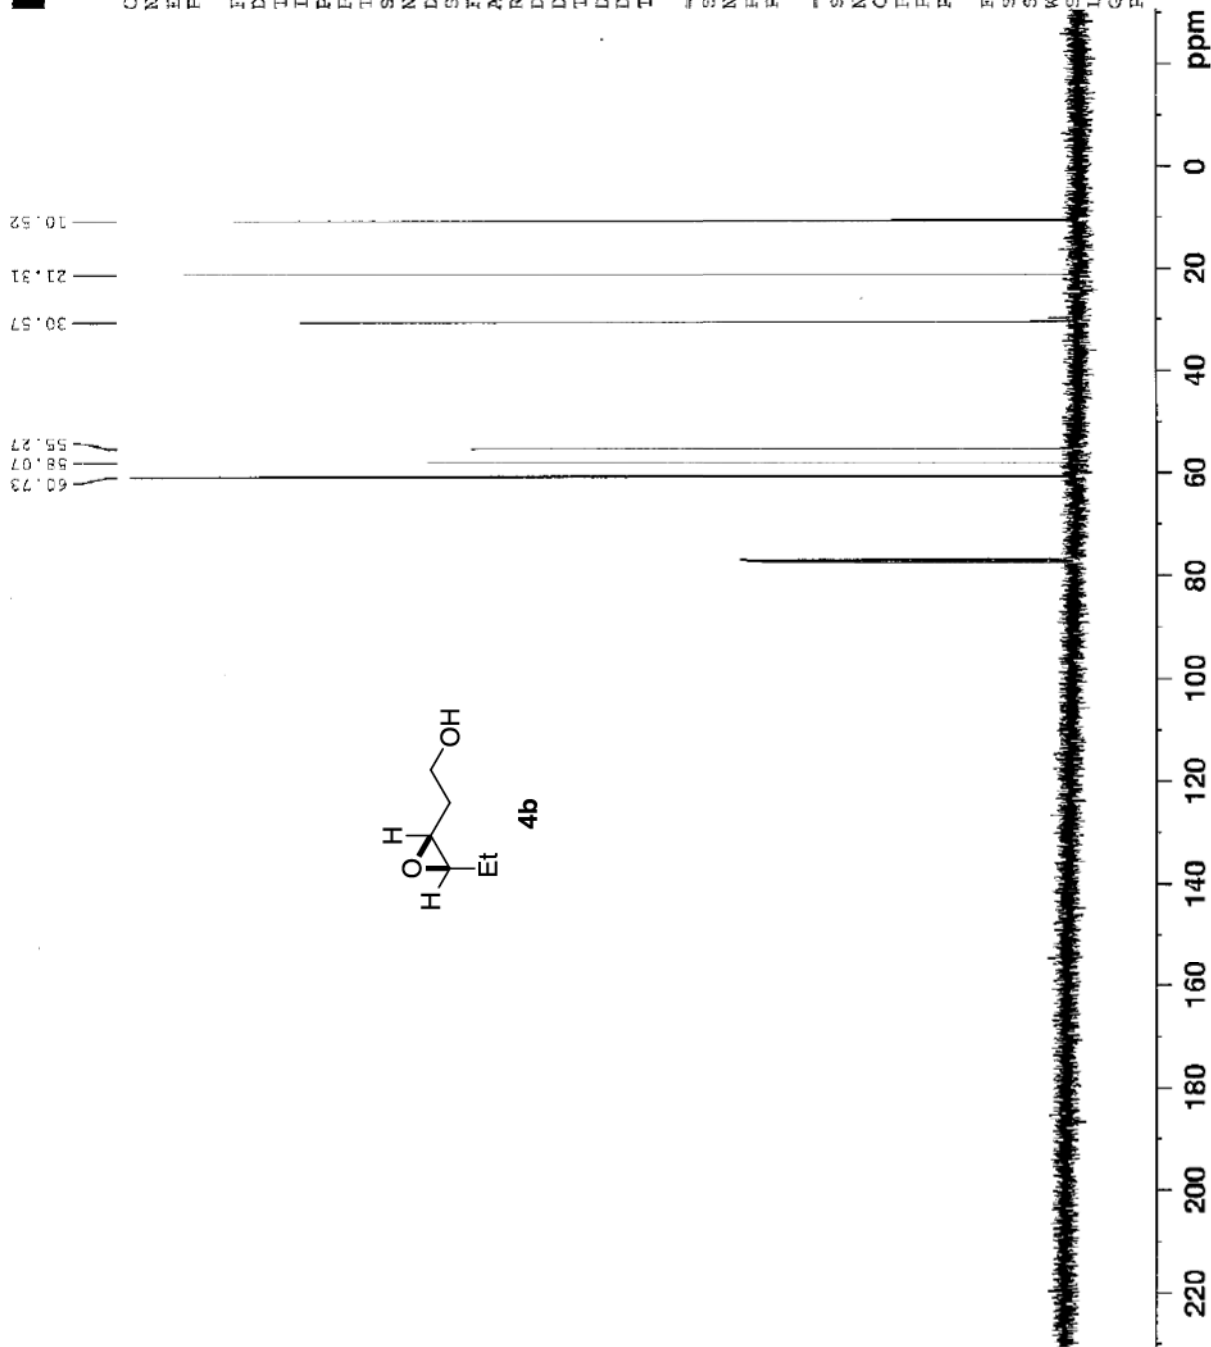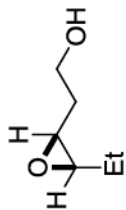

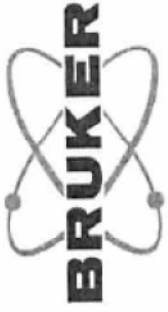

Current Data Parameters  
NAME CW369A  
EXPNO 1  
PROCNO 1

0.869  
3.857  
3.843  
3.118  
3.110  
3.102  
3.094  
3.085  
2.975  
2.966  
2.963  
2.955  
2.951  
2.942  
2.159  
1.880  
1.877  
1.875  
1.866  
1.718  
1.716  
1.702  
1.700  
1.689  
1.554  
1.547  
1.541  
1.535  
1.523  
1.508  
1.494  
1.481  
1.433  
1.421  
1.416  
1.406  
1.404  
1.397  
1.392  
1.378  
1.364  
0.941  
0.927  
0.912

F2 - Acquisition Parameters  
Date\_ 20130628  
Time 15.08  
INSTRUM spect  
PROBHD 5 mm PATXI 1H/  
PULPROG zg  
ID 59992  
SOLVENT CDC13  
NS 8  
DS 0

SWH 10000.000 Hz  
FIDRES 0.166672 Hz  
AQ 2.9999001 sec  
RG 23.38  
DW 50.000 usec  
DE 10.00 usec  
TE 294.6 K  
D1 5.0000000 sec  
IDC 1

==== CHANNEL f1 =====  
SFO1 500.1330685 MHz  
NUC1 1H  
P1 8.00 usec  
PLW1 12.19999981 W

F2 - Processing parameters  
SI 65536  
SF 500.1300025 MHz  
EM  
WDW 0  
SSB 0  
LB 0.30 Hz  
GB 0  
PC 1.00

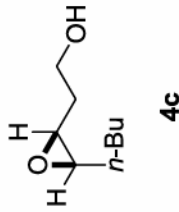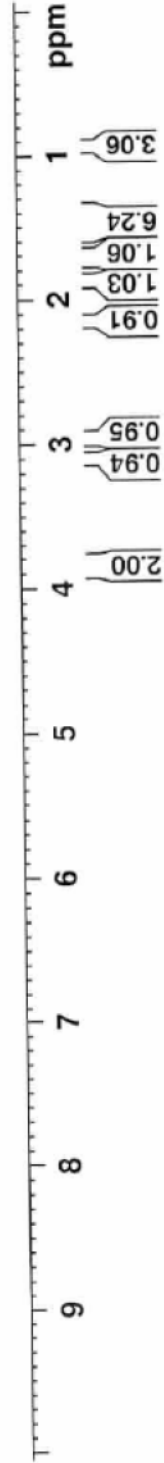

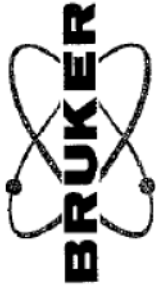

Current Data Parameters  
NAME CW369a-13C  
EXENO 1  
PROCNO 1

F2 - Acquisition Parameters  
Date\_ 20130628  
Time 15.29  
INSTRUM spect  
PROBHD 5 mm PALXI 1H/  
PULPROG zgdc  
TD 178568  
SOLVENT CDC13  
NS 156  
DS 0  
SWH 32894.738 Hz  
FIDRES 0.184214 Hz  
AQ 2.7142336 sec  
RG 196.79  
DW 15.200 usec  
DE 10.00 usec  
TE 295.7 K  
D1 3.00000000 sec  
D11 0.03000000 sec  
TDO 1

===== CHANNEL f1 =====  
SFO1 125.7703646 MHz  
NUC1 13C  
P1 14.00 usec  
PLW1 170.0000000 W

===== CHANNEL f2 =====  
SFO2 500.1320005 MHz  
NUC2 1H  
CPDPRG[2] waitz16  
PCPD2 90.00 usec  
PLW2 12.1999981 W  
PLW12 0.20893000 W

F2 - Processing parameters  
SI 131072  
SF 125.7577771 MHz  
WDW EM  
SSB 0  
LB 1.00 Hz  
GB 0  
PC 1.40

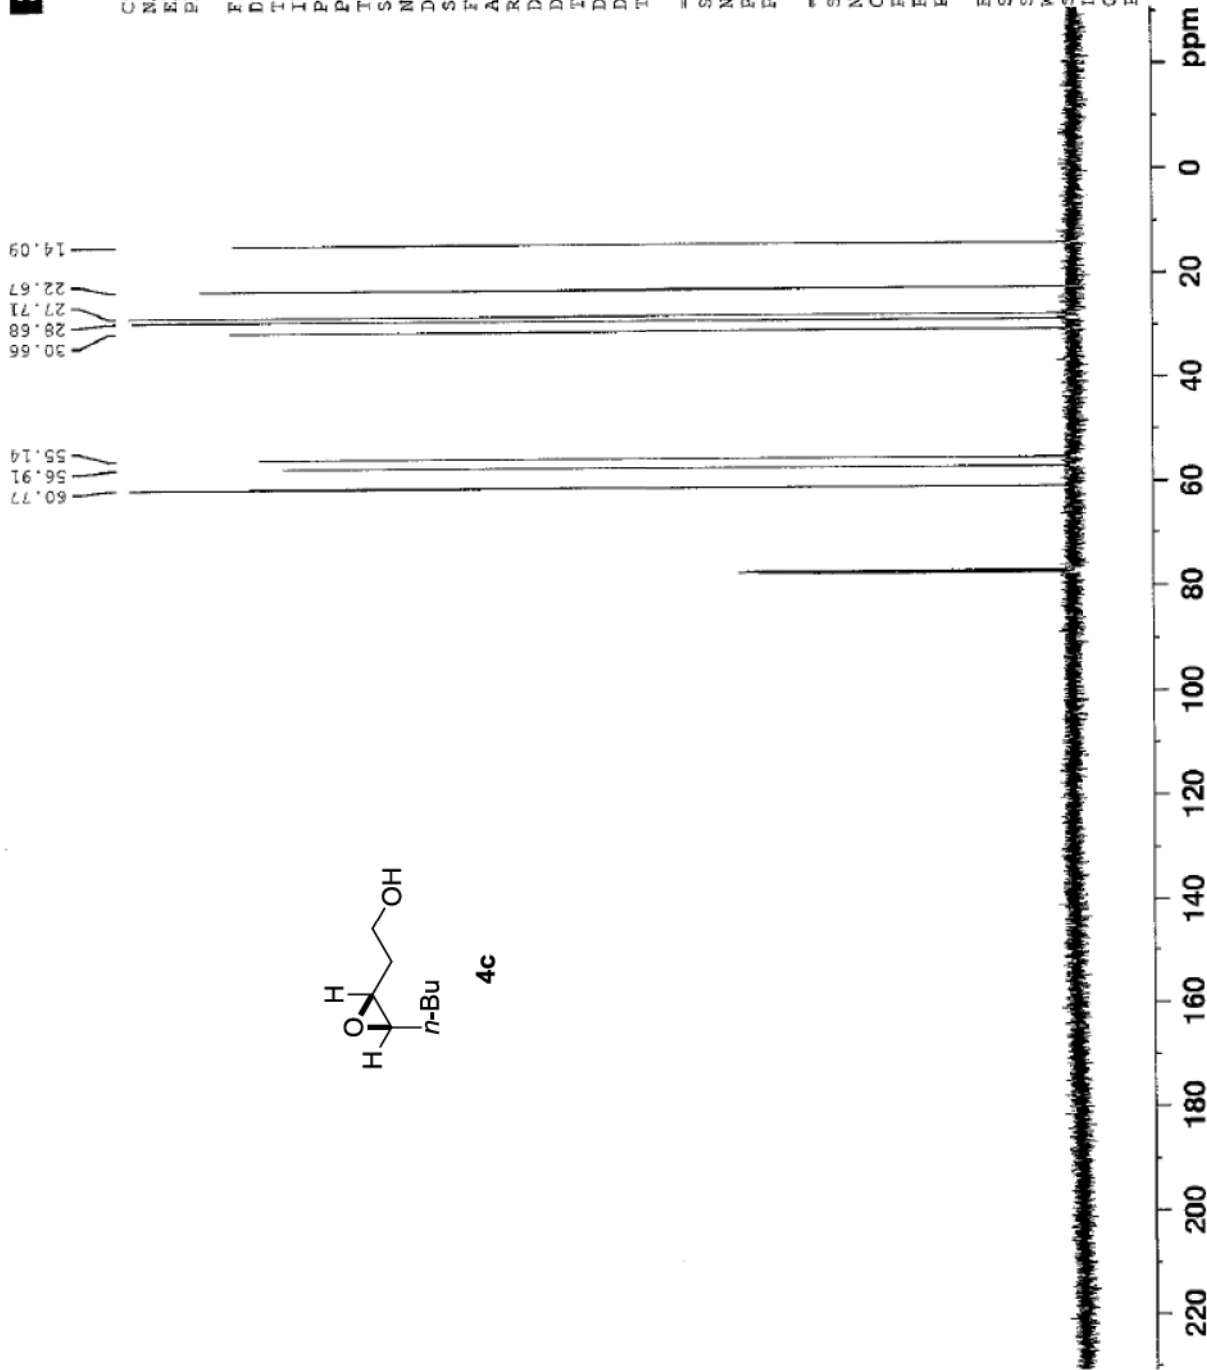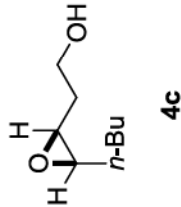



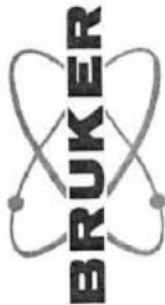

Current Data Parameters  
 NAME CW362a1  
 EXPNO 1  
 PROCNO 1

F2 - Acquisition Parameters

Date\_ 20130721  
 Time 16.05  
 INSTRUM spect  
 PROBHD 5 mm PAXI 1H/  
 PULPROG zg  
 ID 59998  
 SOLVENT CDC13  
 NS 8  
 DS 0  
 SWH 10000.000 Hz  
 FIDRES 0.166672 Hz  
 AC 2.9999001 sec  
 RG 79.04  
 DW 50.000 usec  
 DE 10.00 usec  
 TE 295.1 K  
 D1 5.00000000 sec  
 TDO 1

\*\*\*\*\* CHANNEL f1 \*\*\*\*\*  
 SFO1 500.1300885 MHz  
 NUC1 1H  
 P1 8.00 usec  
 PLW1 12.19999961 W

F2 - Processing parameters  
 SI 65536  
 SF 500.1300093 MHz  
 EX  
 WDW 0  
 SSB 0  
 LB 0.30 Hz  
 GB 0  
 PC 1.00

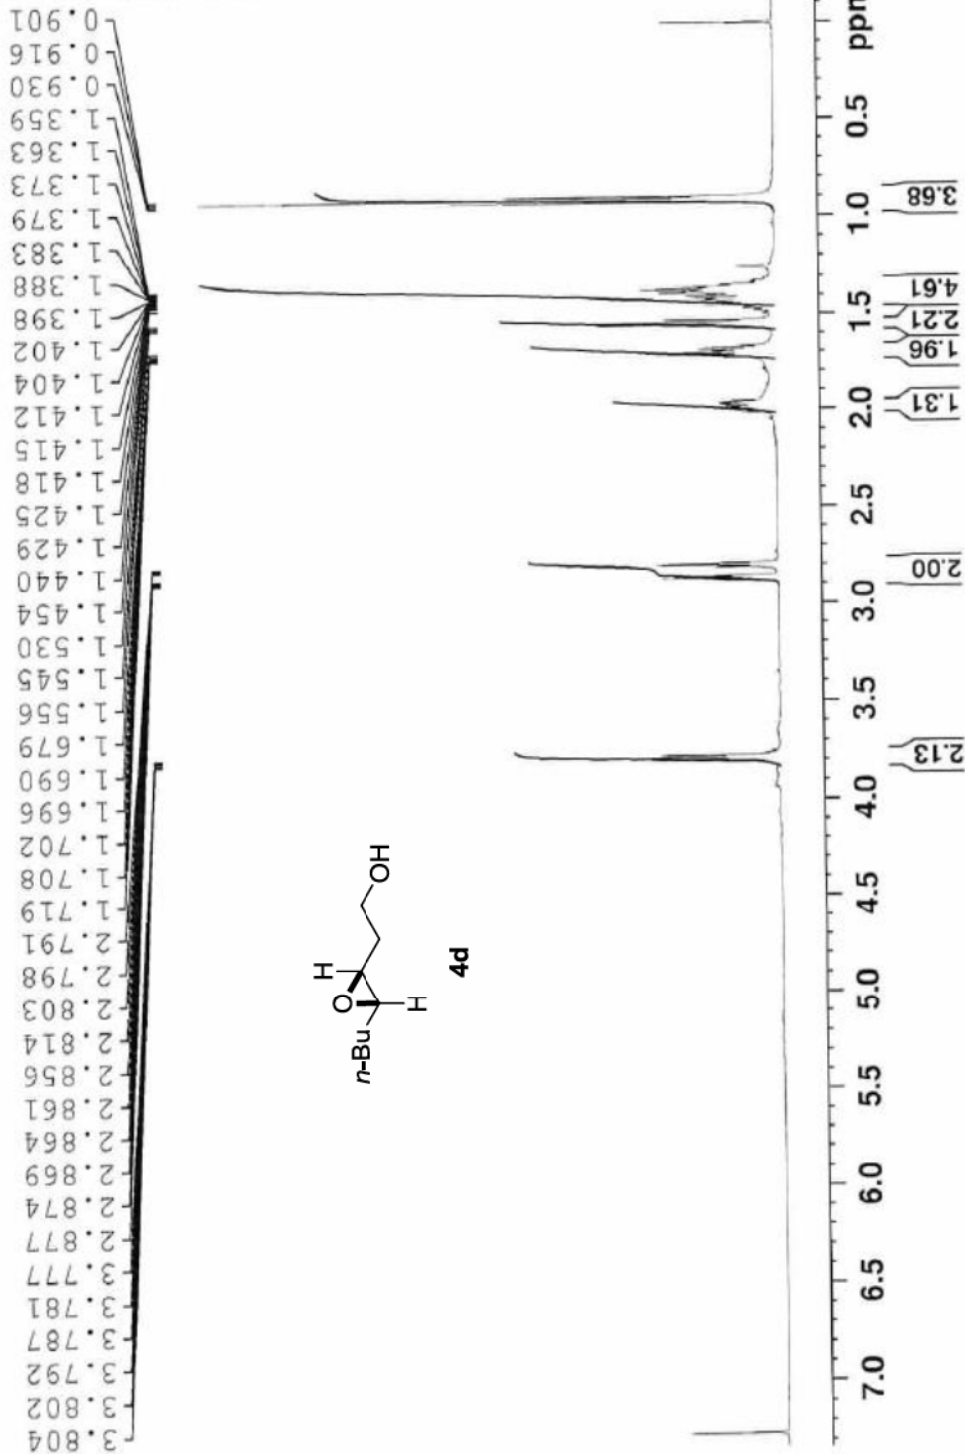

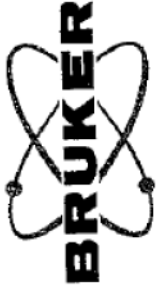

Current Data Parameters  
NAME cw362al-13C  
EXPNO 1  
PROCNO 1

F2 - Acquisition Parameters  
Date\_ 20130721  
Time 16.22  
INSTRUM spect  
PROBHD 5 mm PAIXI 1H/  
PULPROG zgdc  
TD 178568  
SOLVENT CDC13  
NS 91  
DS 0  
SWH 32894.738 Hz  
FIDRES 0.184214 Hz  
AQ 2.7142336 sec  
RG 196.79  
DW 15.200 usec  
DE 10.00 usec  
TE 295.8 K  
TD0 1  
D1 3.0000000 sec  
D11 0.0300000 sec

CHANNEL f1  
SFO1 125.7703648 MHz  
NUC1 13C  
P1 14.00 usec  
PLW1 170.0000000 W

CHANNEL f2  
SFO2 500.1320005 MHz  
NUC2 1H  
CPDPRG[2] waltz16  
PCPD2 90.00 usec  
PLW2 12.19999981 W  
PLW12 0.20893000 W

F2 - Processing parameters  
SI 131072  
SF 125.7577732 MHz  
WDW EM  
SSB 0  
LB 0  
GB 0  
PC 1.40

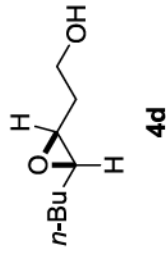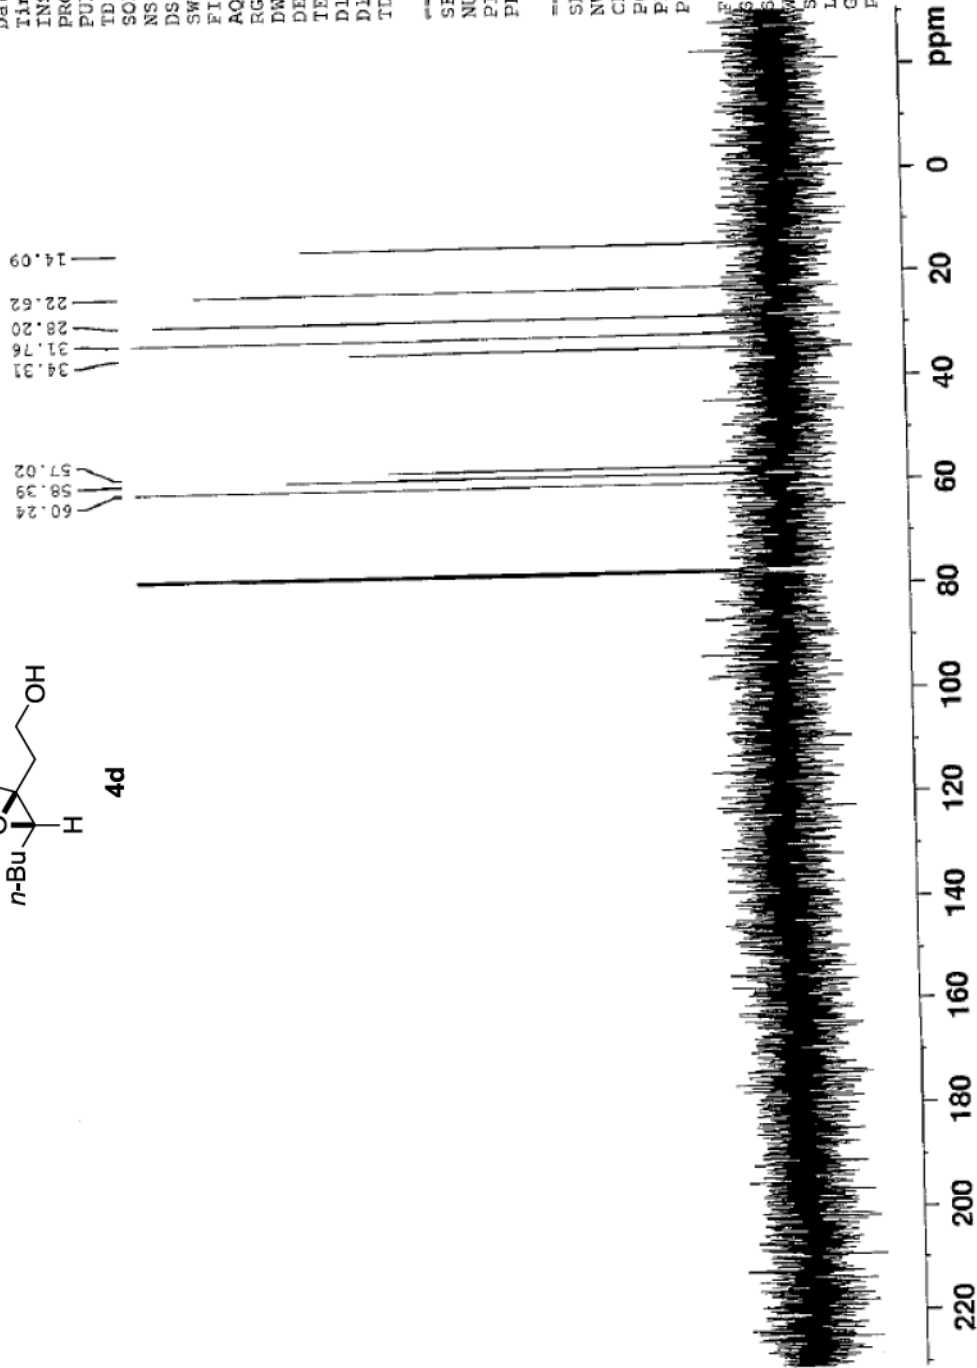

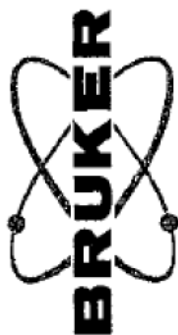

Current Data Parameters  
NAME CW373a3  
EXPNO 1  
PROCNO 1

F2 - Acquisition Parameters  
Date\_ 20130730  
Time 11.52  
INSTRUM spect  
PROBHD 5 mm PATXI 1H/  
PULPROG zg  
ID 59998  
SOLVENT CDCl3  
NS 8  
DS 0  
SWH 10000.000 Hz  
FIDRES 0.166672 Hz  
AQ 2.9999001 sec  
RG 37.62  
DW 50.000 usec  
DE 10.00 usec  
TE 295.2 K  
D1 5.00000000 sec  
TD0 1

CHANNEL f1  
SFO1 500.1330885 MHz  
NUC1 1H  
P1 6.00 usec  
PLW1 12.19999981 W

F2 - Processing parameters  
SI 65536  
SF 500.1300047 MHz  
WDW EM  
SSB 0  
LB 0.30 Hz  
GB 0  
PC 1.00

3.800  
3.790  
3.786  
3.778  
3.776  
2.901  
2.896  
2.892  
2.887  
2.883  
2.879  
2.874  
2.803  
2.799  
2.792  
2.787  
2.781  
2.776  
1.997  
1.988  
1.984  
1.981  
1.976  
1.973  
1.969  
1.967  
1.961  
1.959  
1.956  
1.721  
1.710  
1.693  
1.681  
1.608  
1.605  
1.594  
1.590  
1.579  
1.575  
1.567  
1.565  
1.018  
1.003  
0.988

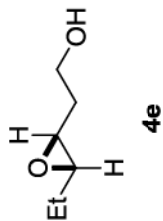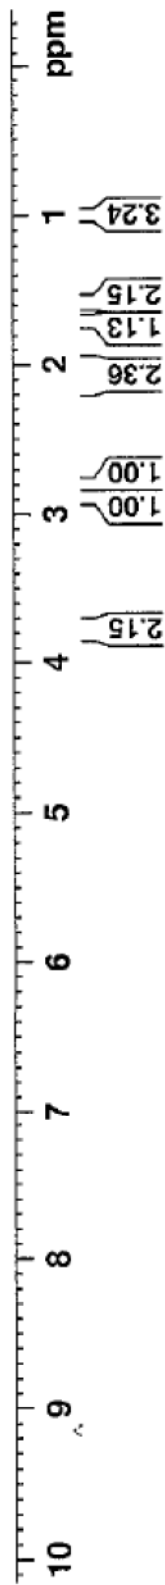

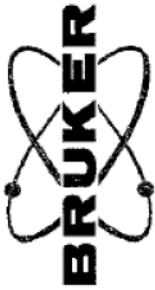

Current Data Parameters  
 NAME cw373a3-13C  
 EXPNO 1  
 PROCNO 1

F2 - Acquisition Parameters  
 Date\_ 20130730  
 Time 12.13  
 INSTRUM spect  
 PROBHD 5 mm PATXI 1H/  
 PULPROG zgdc  
 TD 178568  
 SOLVENT CDCl3  
 NS 251  
 DS 0  
 SWH 32894.738 Hz  
 FIDRES 0.184214 Hz  
 AQ 2.7142336 sec  
 RG 196.79  
 DW 15.200 usec  
 DE 10.00 usec  
 TE 295.8 K  
 D1 1.00000000 sec  
 D11 0.03000000 sec  
 TDO 1

CHANNEL f1  
 SFO1 125.7703648 MHz  
 NUC1 13C  
 P1 14.00 usec  
 PLW1 170.0000000 W

CHANNEL f2  
 SFO2 500.1320005 MHz  
 NUC2 1H  
 CPDPRG[2] waltz16  
 PCPD2 90.00 usec  
 PLW2 12.19999981 W  
 PLW12 0.20893000 W

F2 - Processing parameters  
 SI 131072  
 SF 125.7577759 MHz  
 EM  
 WDW 0  
 SSB 0  
 LB 1.00 Hz  
 GB 0  
 PC 1.40

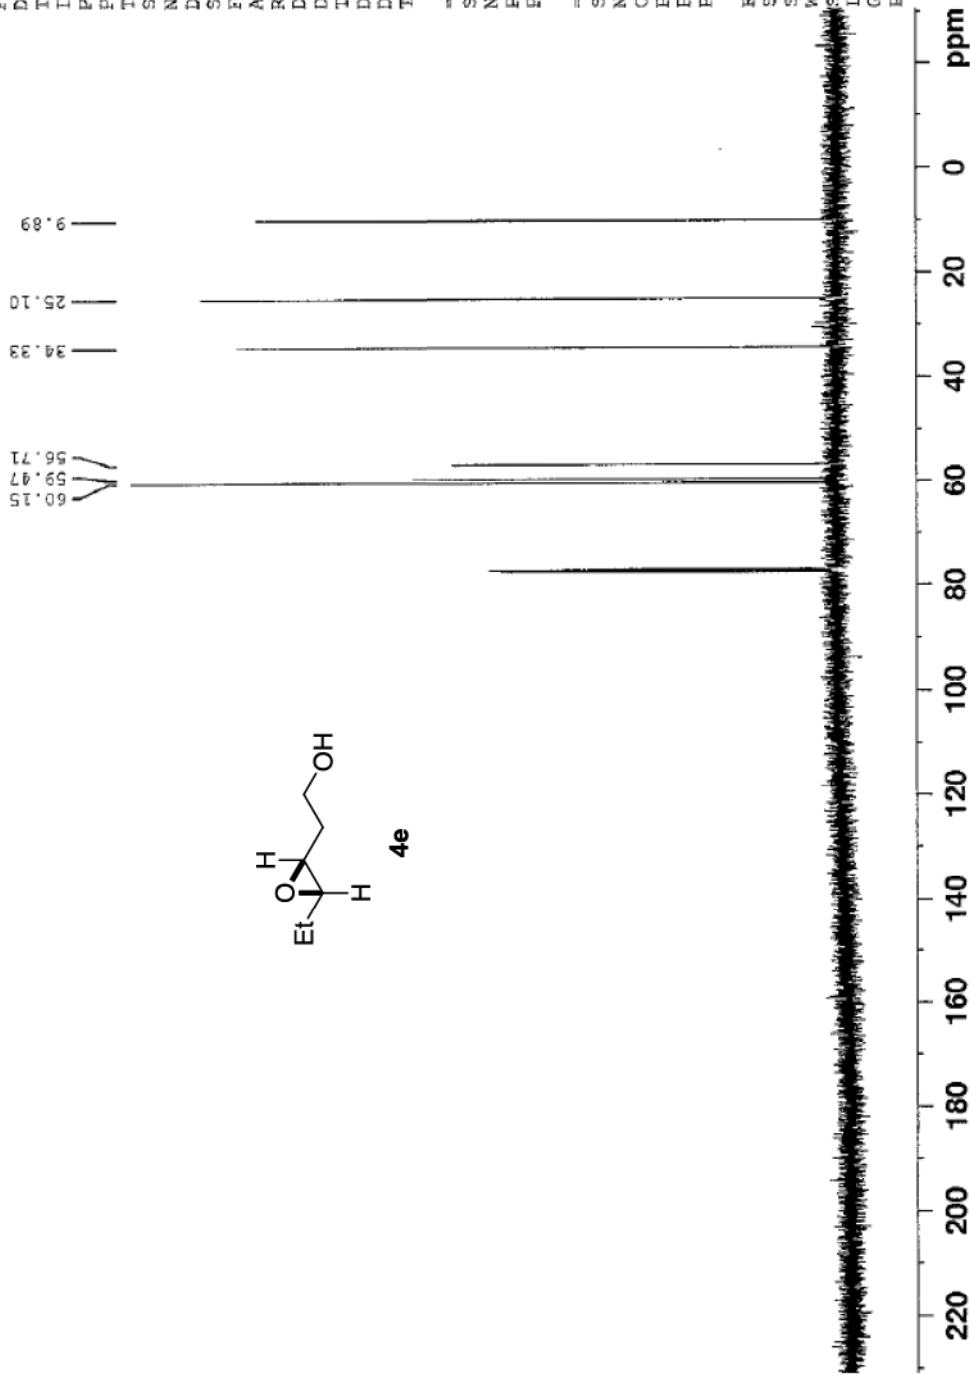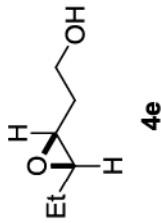

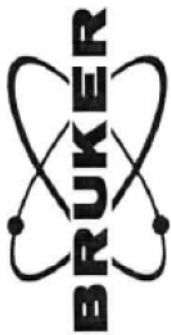

Current Data Parameters  
 NAME cw386b  
 EXPNO 1  
 PROCNO 1

F2 - Acquisition Parameters

Date\_ 20130713  
 Time 13.15  
 INSTRUM spect  
 PROBHD 5 mm QNP 1H/13  
 PULPROG zg  
 TD 59998  
 SOLVENT CDC13  
 NS 16  
 DS 0  
 SWH 10000.000 Hz  
 FIDRES 0.166672 Hz  
 AQ 2.9999499 sec  
 RG 406.4  
 DW 50.000 usec  
 DE 7.50 usec  
 TE 293.7 K  
 D1 5.0000000 sec  
 TD0 1

==== CHANNEL f1 =====  
 NUC1 1H  
 P1 10.00 usec  
 PL1 0.00 dB  
 SF01 499.8740056 MHz

F2 - Processing parameters  
 SI 32768  
 SF 499.8700179 MHz  
 WDW EM  
 SSB 0  
 LB 0.30 Hz  
 GB 0  
 PC 1.00

7.373  
7.370  
7.358  
7.349  
7.344  
7.318  
7.304  
7.301  
7.294  
7.285  
7.263  
4.136  
4.128  
3.781  
3.772  
3.421  
3.411  
3.407  
3.401  
3.397  
3.387  
1.619  
1.606  
1.595  
1.582  
1.570  
1.556  
1.540

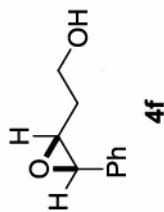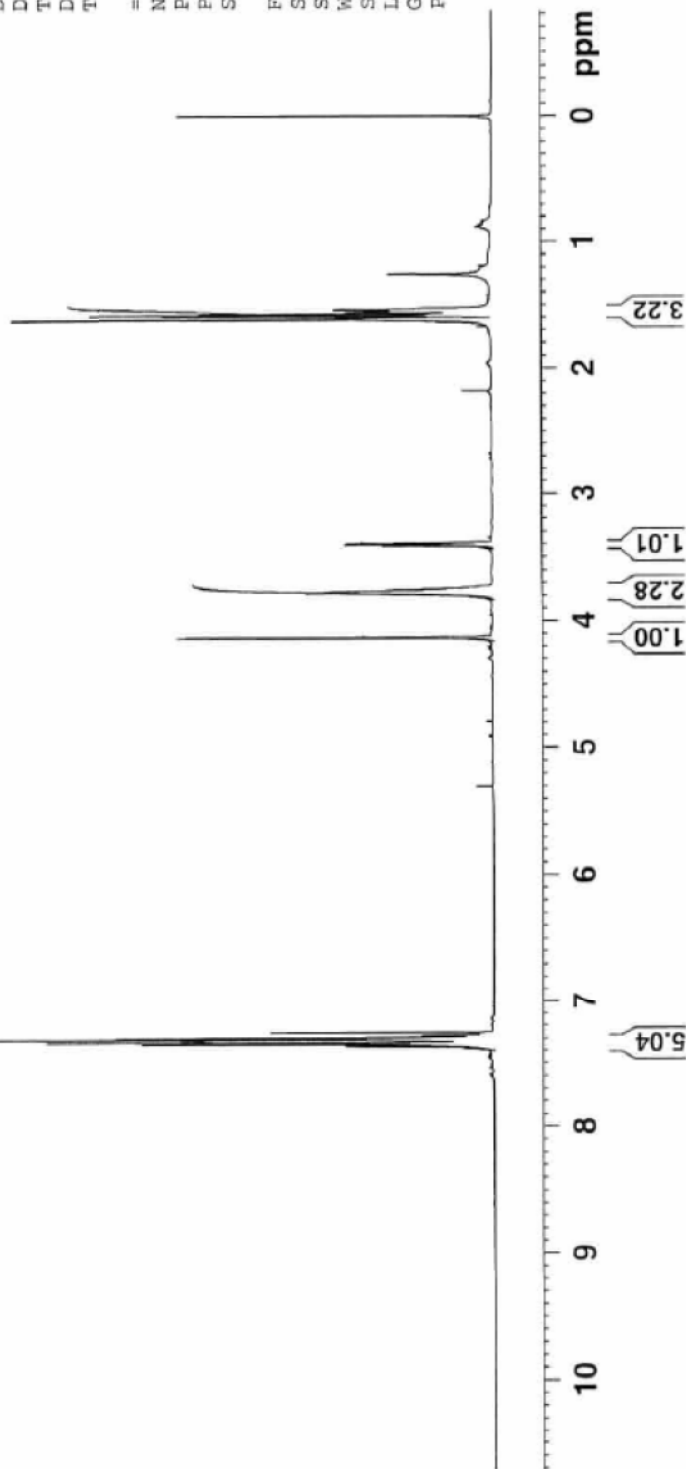

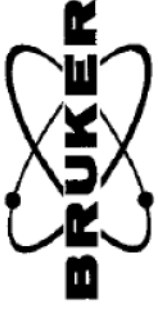

Current Data Parameters  
 NAME cw386b-13C  
 EXPNO 1  
 PROCNO 1

F2 - Acquisition Parameters

Date\_ 20130713  
 Time 14.55  
 INSTRUM spect  
 PROBHD 5 mm QNP 1H/13  
 PULPROG zgdc  
 TD 142854  
 SOLVENT CDCl3  
 NS 1330  
 DS 0  
 SWH 32679.738 Hz  
 FIDRES 0.228763 Hz  
 AQ 2.1857162 sec  
 RG 18390.4  
 DW 15.300 usec  
 DE 7.50 usec  
 TE 294.7 K  
 D1 2.00000000 sec  
 d11 0.03000000 sec  
 TD0 1

==== CHANNEL f1 =====  
 NUC1 13C  
 P1 8.50 usec  
 PL1 0.00 dB  
 SFO1 125.7049602 MHz

==== CHANNEL f2 =====  
 CPDPRG2 waltz16  
 NUC2 1H  
 PCPD2 90.00 usec  
 PL2 1.00 dB  
 PL12 21.00 dB  
 SFO2 499.8734991 MHz

F2 - Processing parameters  
 SI 65536  
 SF 125.6923981 MHz  
 WDW EM  
 SSB 0  
 LB 1.00 Hz  
 GB 0  
 PC 1.40

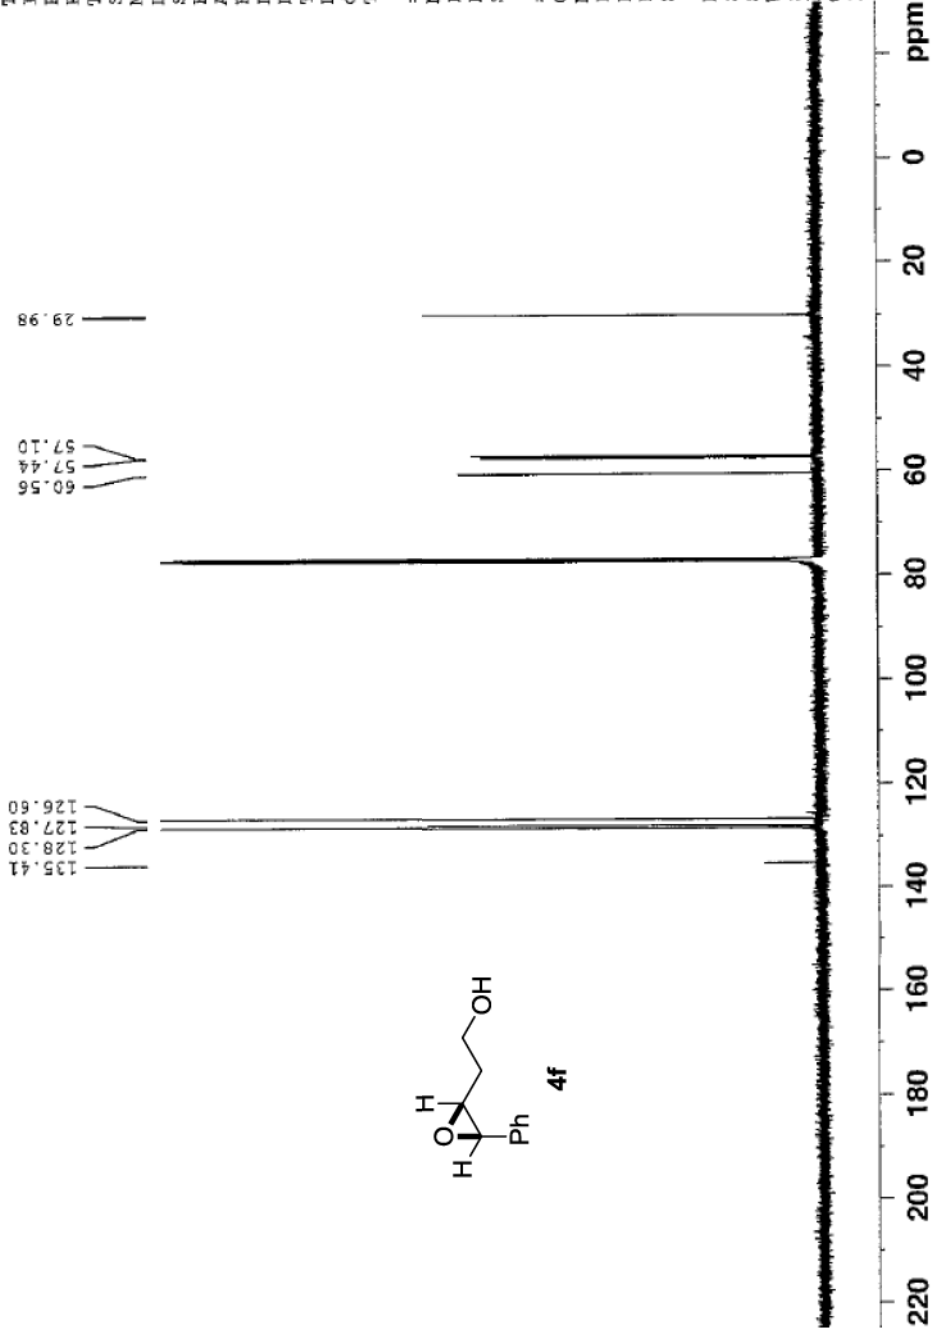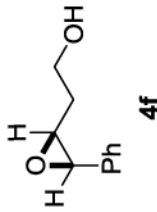

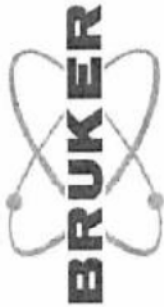

Current Data Parameters  
NAME cw467b  
EXPNO 1  
PROCNO 1

F2 - Acquisition Parameters  
Date\_ 20131011  
Time 10.53  
INSTRUM spect  
PROBHD 5 mm PATXI 1H/  
PULPROG zg

TD 59938  
SOLVENT CDC13  
NS 8  
DS C  
SWH 10000.000 Hz  
FIDRES 0.166672 Hz  
AQ 2.9999001 sec  
RG 79.04  
DW 50.000 usec  
DE 10.000 usec  
TE 296.4 K  
D1 5.00000000 sec  
ID0 1

CHANNEL #1  
SFO1 500.1330885 MHz  
NUC1 1H  
P1 8.00 usec  
PLW1 12.19999961 W

F2 - Processing parameters  
SI 65536  
SF 500.1300103 MHz  
WDW EM  
SSB 0  
LB 0  
GB 0  
PC 1.00

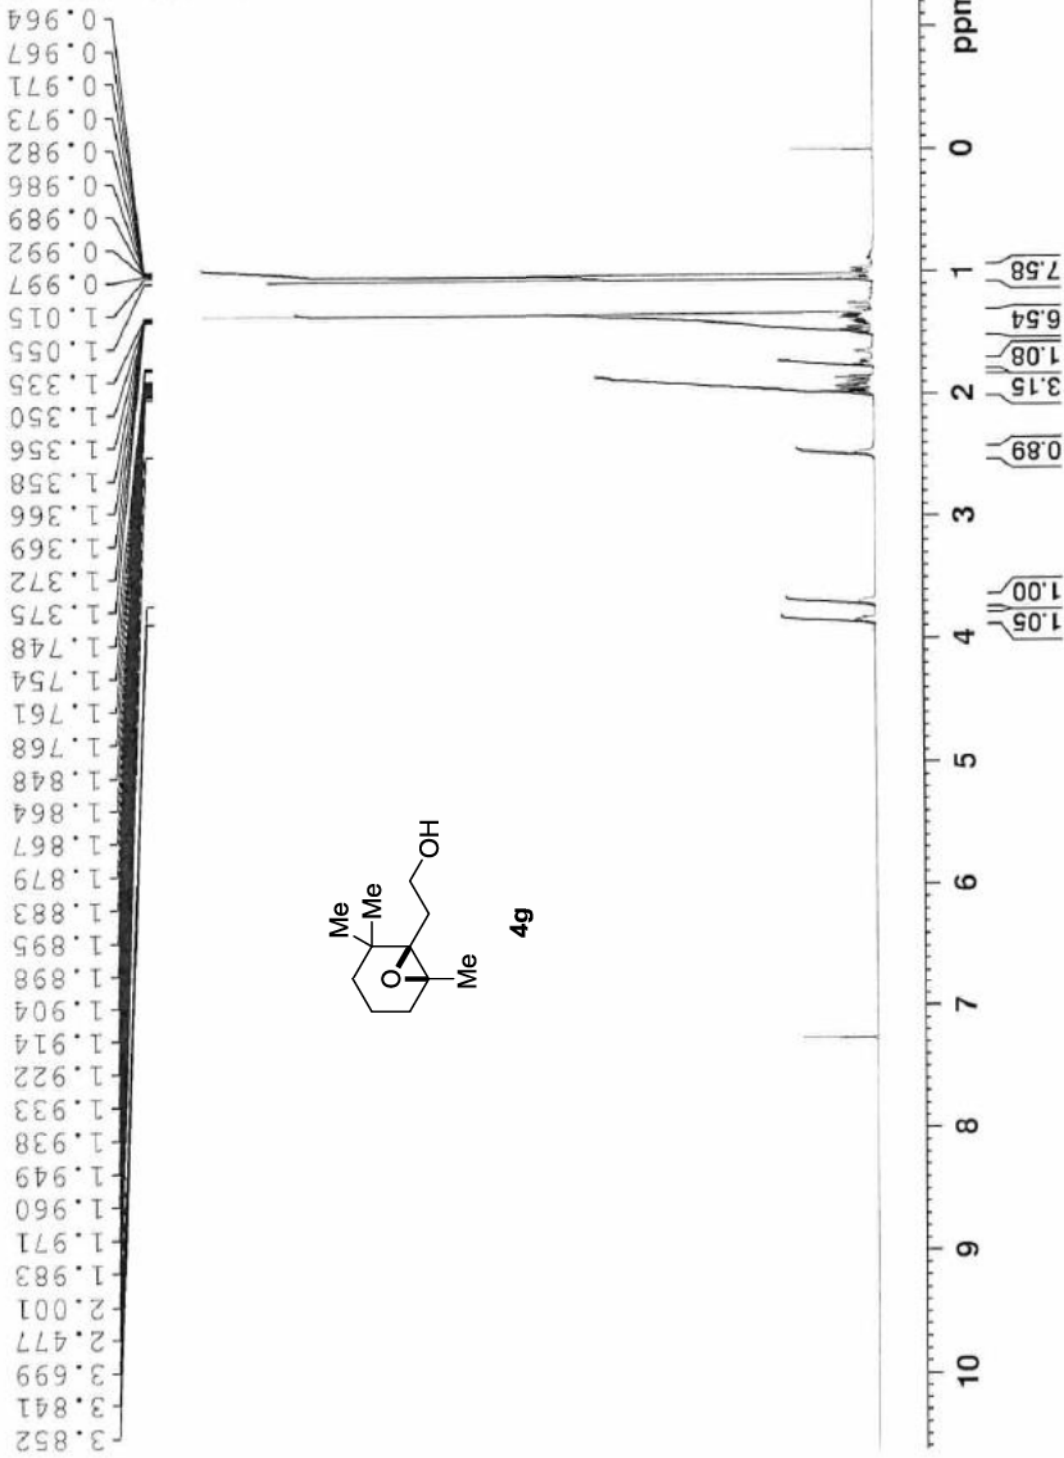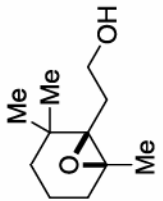

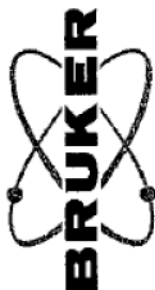

Current Data Parameters  
NAME cw467a-13C  
EXPNO 1  
PROCNO 1

F2 - Acquisition Parameters

Date\_ 20131010  
Time 18.59  
INSTRUM spect  
PROBHD 5 mm PATXI 1H/  
PULPROG zgdc  
TD 178568  
SOLVENT CDC13  
NS 571  
DS 0  
SWH 32894.738 Hz  
FIDRES 0.184214 Hz  
AQ 2.7142336 sec  
RG 196.79  
DW 15.200 usec  
DE 10.00 usec  
TE 296.6 K  
D1 1.0000000 sec  
D11 0.0300000 sec  
TDO 1

==== CHANNEL f1 =====  
SFO1 125.7703648 MHz  
NUC1 13C  
P1 14.00 usec  
PLW1 170.0000000 W

==== CHANNEL f2 =====  
SFO2 500.1320005 MHz  
NUC2 1H  
CPDPRGf2 waltz16  
PCPDZ 90.00 usec  
PLW2 12.19999981 W  
PLW12 0.20893000 W

F2 - Processing parameters  
SI 131072  
SF 125.7577729 MHz  
WDW EM  
SSB 0  
LB 1.00 Hz  
GB 0  
PC 1.40

70.00  
63.84  
61.72  
35.19  
34.63  
29.86  
29.10  
25.97  
24.64  
21.81  
16.96

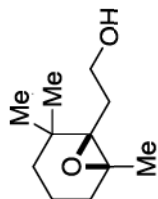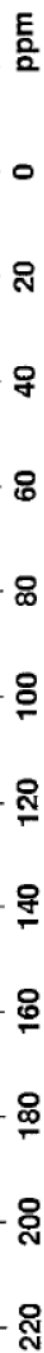



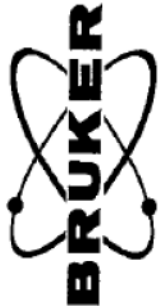

Current Data Parameters  
 NAME cw389a  
 EXPNO 1  
 PROCNO 1

F2 - Acquisition Parameters  
 Date\_ 20130714  
 Time 16.50  
 INSTRUM spect  
 PROBHD 5 mm QNP 1H/13  
 PULPROG zg  
 TD 59998  
 SOLVENT CDCl3  
 NS 8  
 DS 0  
 SWH 10000.000 Hz  
 FIDRES 0.166672 Hz  
 AQ 2.9999499 sec  
 RG 406.4  
 DW 50.000 usec  
 DE 7.50 usec  
 TE 294.1 K  
 D1 5.0000000 sec  
 TDO 1

==== CHANNEL f1 =====  
 NUC1 1H  
 P1 10.00 usec  
 PL1 0.00 dB  
 SFO1 499.8740056 MHz  
 F2 - Processing parameters  
 SI 32768  
 SF 499.8700149 MHz  
 WDW EM  
 SSB 0  
 LB 0.30 Hz  
 GB 0  
 PC 1.00

4.064  
3.782  
3.771  
3.759  
2.093  
2.078  
2.067  
2.052  
1.790  
1.780  
1.764  
1.754  
1.712  
1.556  
1.544  
1.537  
1.525  
1.523  
1.519  
1.512  
1.505  
1.475  
1.464  
1.450  
1.444  
1.438  
1.435  
1.423  
1.407  
1.394  
1.379  
1.351  
1.341  
1.320  
1.313  
1.308  
1.306  
1.298  
1.260  
0.902  
0.888  
0.881  
0.875

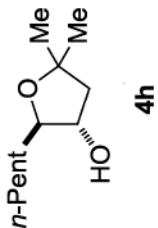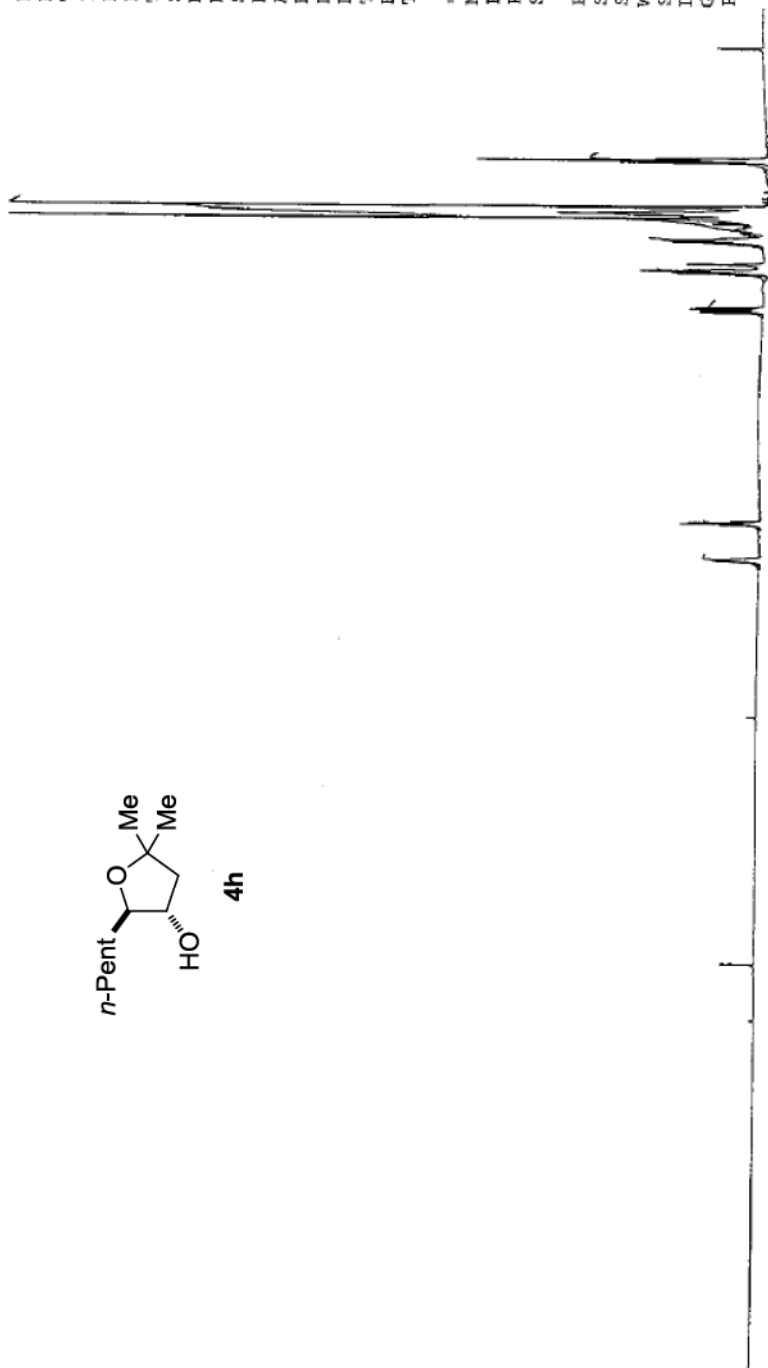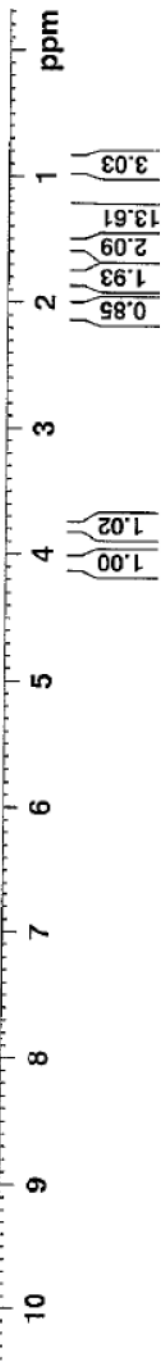

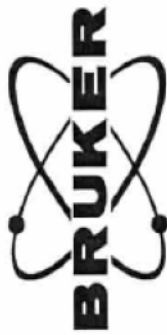

Current Data Parameters  
NAME cw389a-13C  
EXPNO 1  
PROCNO 1

F2 - Acquisition Parameters  
Date\_ 20130714  
Time 17.52  
INSTRUM spect  
PROBHD 5 mm QNP 1H/13  
PULPROG zgdc  
TD 142854  
SOLVENT CDCl3  
NS 793  
DS 0  
SWH 32679.738 Hz  
FIDRES 0.228763 Hz  
AQ 2.1857162 sec  
RG 18390.4  
DW 15.300 usec  
DE 7.50 usec  
TE 294.7 K  
D1 2.00000000 sec  
d11 0.03000000 sec  
TD0 1

==== CHANNEL f1 =====  
NUC1 13C  
P1 8.50 usec  
PL1 0.00 dB  
SFO1 125.7049802 MHz

==== CHANNEL f2 =====  
CPDPRG2 waltz16  
NUC2 1H  
PCPD2 90.00 usec  
PL2 1.00 dB  
PL12 21.00 dB  
SFO2 499.8734991 MHz

F2 - Processing parameters  
SI 65536  
SF 125.6923986 MHz  
WDW EM  
SSB 0  
LB 1.00 Hz  
GB 0  
PC 1.40

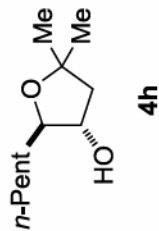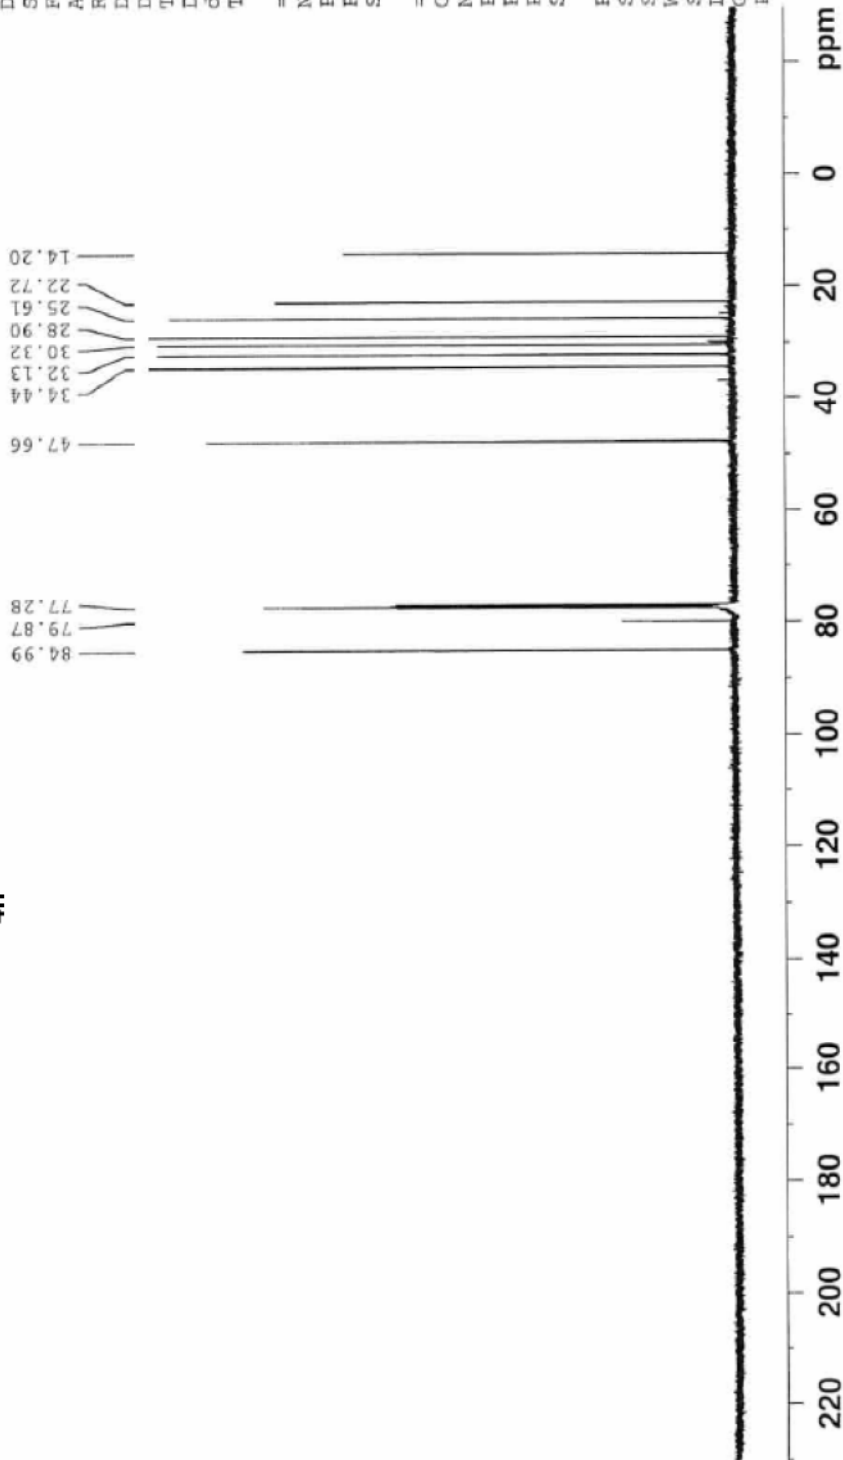

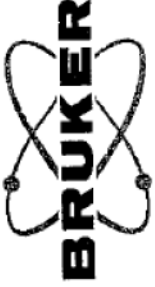

Current Data Parameters  
NAME cw418a  
EXNO 1  
PROCNO 1

F2 - Acquisition Parameters  
Date\_ 20130808  
Time 11.06  
INSTRUM spect  
PROBHD 5 mm PATXI LH/  
PULPROG zg  
TD 59998  
SOLVENT CDC13  
NS 8  
DS 0  
SWH 10000.000 Hz  
FIDRES 0.166672 Hz  
AQ 2.9999001 sec  
RG 126.24  
DW 50.000 usec  
DE 10.00 usec  
TE 296.2 K  
D1 5.0000000 sec  
TD0 1

CHANNEL f1  
SF01 500.1330885 MHz  
NUC1 LH  
P1 8.00 usec  
PLW1 12.19999981 W

F2 - Processing parameters  
SI 65536  
SF 500.1300149 MHz  
WDW EM  
SSB 0  
LB 0.30 Hz  
GB 0  
PC 1.00

7.415  
7.411  
7.407  
7.397  
7.395  
7.383  
7.380  
7.368  
7.346  
7.342  
7.335  
7.332  
7.258  
4.944  
3.244  
3.242  
3.240  
3.238  
3.236  
3.232  
2.981  
2.976  
2.971  
2.966  
2.777  
2.774  
2.769  
2.767  
2.759  
2.251

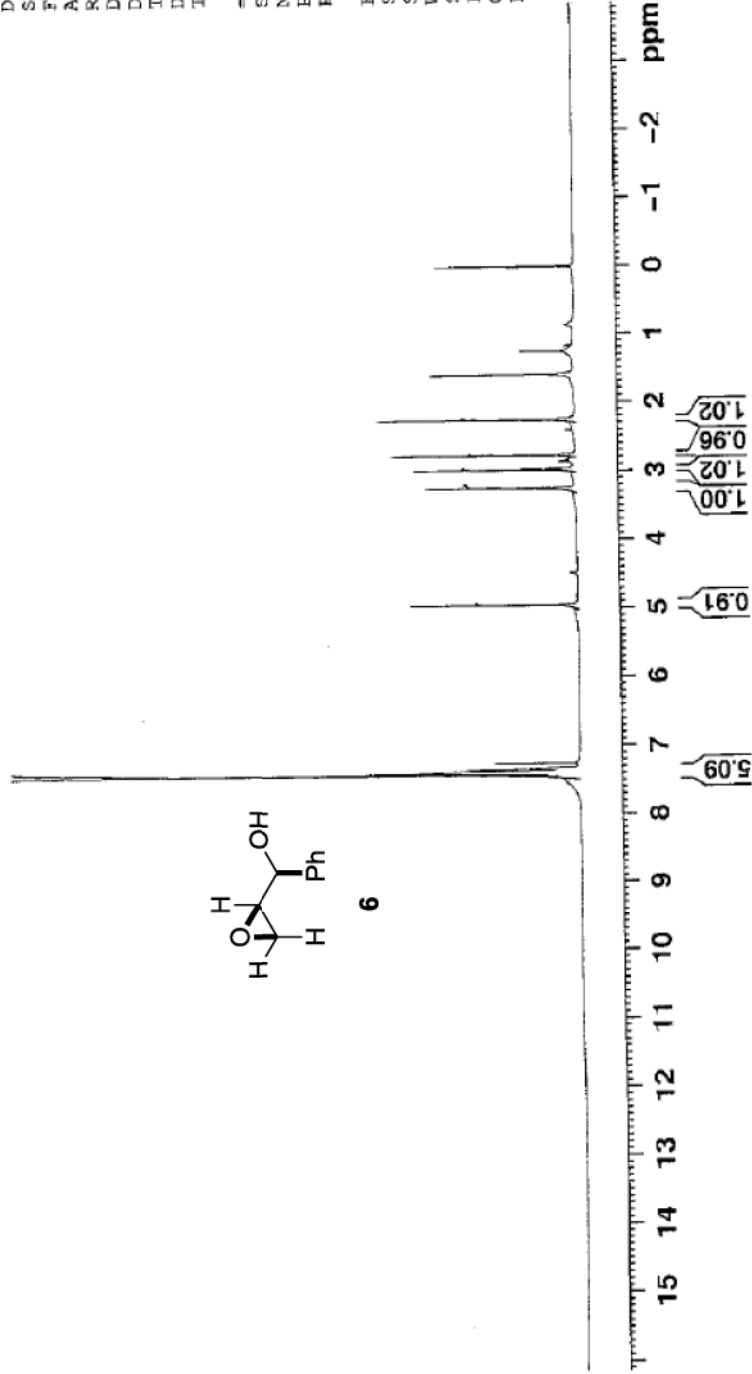

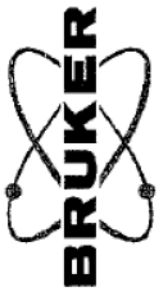

Current Data Parameters  
NAME cw418a-13C  
EXPNO 1  
PROCNO 1

F2 - Acquisition Parameters  
Date\_ 20130808  
Time 11.59  
INSTRUM spect  
PROBHD 5 mm PAXXI 1H/  
PULPROG zgdc  
TD 178568  
SOLVENT CDCl3  
NS 751  
DS 0  
SWH 32894.738 Hz  
FIDRES 0.184214 Hz  
AQ 2.7142336 sec  
RG 196.79  
DW 15.200 usec  
DE 10.00 usec  
TE 298.2 K  
D1 1.00000000 sec  
D11 0.03000000 sec  
TDO 1

===== CHANNEL f1 =====  
SFO1 125.7703648 MHz  
NUC1 13C  
P1 14.00 usec  
PLW1 170.0000000 W

===== CHANNEL f2 =====  
SFO2 500.1320005 MHz  
NUC2 1H  
CPDPRG[2] waltz16  
PCPD2 90.00 usec  
PLW2 12.19999981 W  
PLW12 0.20893000 W

F2 - Processing parameters  
SI 131072  
SF 125.7577726 MHz  
EM  
SSB 0  
LB 0 1.00 Hz  
GB 0  
PC 1.40

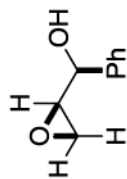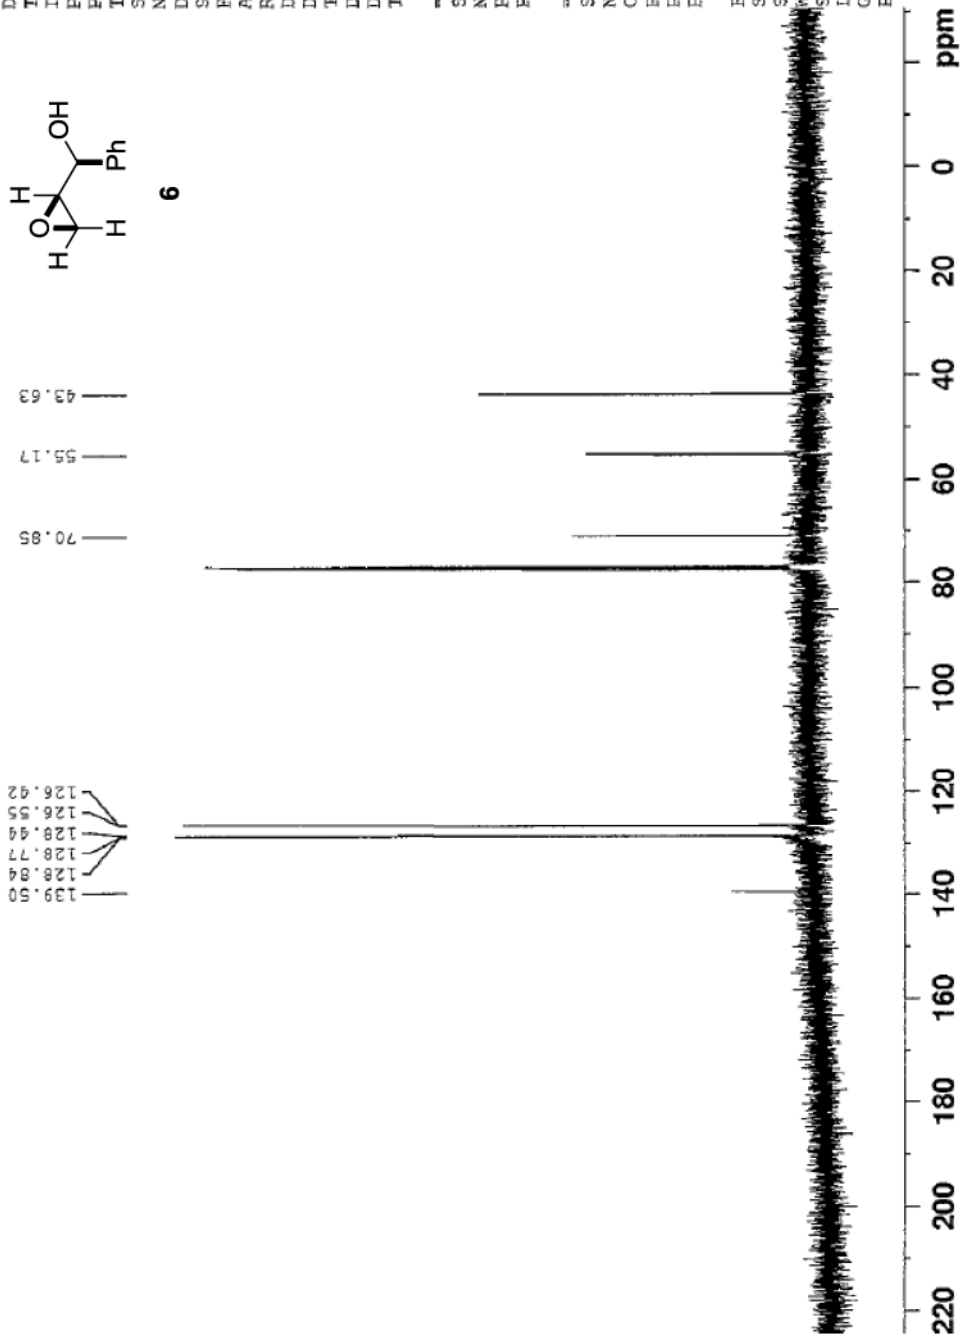

Data File: c:\star\5-14-13 2:08:41 pm -1.run  
 Channel: 2 = 225.00 nm RESULTS  
 Sample ID: cw234aarac  
 Operator (Inj): OB-H, hex:IPA= 98:2, 1.0 mL/min  
 Injection Date:  
 Injection Method: c:\star\chuan\standard 2%.mth  
 Run Time (min): 19.387  
 Workstation:  
 Instrument (Inj): Varian Star #1

Operator (Calc):  
 Calc Date: 05/14/13 02:31:17 PM  
 Times Calculated: 1  
 Calculation Method: c:\windows\temp\5-14-13 2:08:41 pm  
 Instrument (Calc): Varian Star #1  
 Run Mode: Analysis  
 Peak Measurement: Peak Area  
 Calculation Type: Percent  
 Calibration Level: N/A  
 Verification Tolerance: N/A

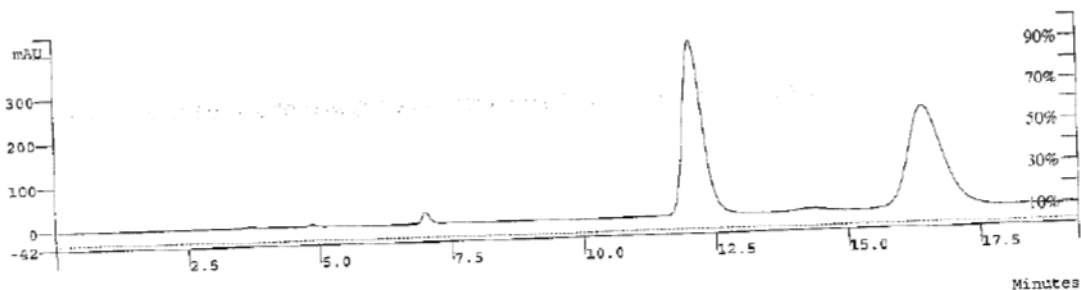

| Peak No       | Peak Name | Result (%)      | Ret. Time (min) | Time Offset (min) | Area (counts)    | Rel Ret Time | Sep. Code | Width 1/2 (sec) | Status Codes | Group |
|---------------|-----------|-----------------|-----------------|-------------------|------------------|--------------|-----------|-----------------|--------------|-------|
| 1             |           | 49.4845         | 12.040          | 0.000             | 52721944         | 0.00         | BB        | 23.5            |              | 0     |
| 2             |           | 50.5155         | 16.413          | 0.000             | 53820408         | 0.00         | BB        | 42.3            |              | 0     |
| <b>Totals</b> |           | <b>100.0000</b> |                 | <b>0.000</b>      | <b>106542352</b> |              |           |                 |              |       |

Data File: c:\star\12-28-13 2:11:58 pm -1.run  
 Channel: 2 = 225.00 nm RESULTS  
 Sample ID: cw345  
 Operator (Inj): OB-H, hex:IPA=95:5, 1.0 mL/min  
 Injection Date:  
 Injection Method: c:\star\chuan\standard 2%.mth  
 Run Time (min): 22.960  
 Workstation:  
 Instrument (Inj): Varian Star #1

Operator (Calc):  
 Calc Date: 12/28/13 02:37:57 PM  
 Times Calculated: 1  
 Calculation Method: c:\windows\temp\12-28-13 2:11:58  
 Instrument (Calc): Varian Star #1  
 Run Mode: Analysis  
 Peak Measurement: Peak Area  
 Calculation Type: Percent  
 Calibration Level: N/A  
 Verification Tolerance: N/A

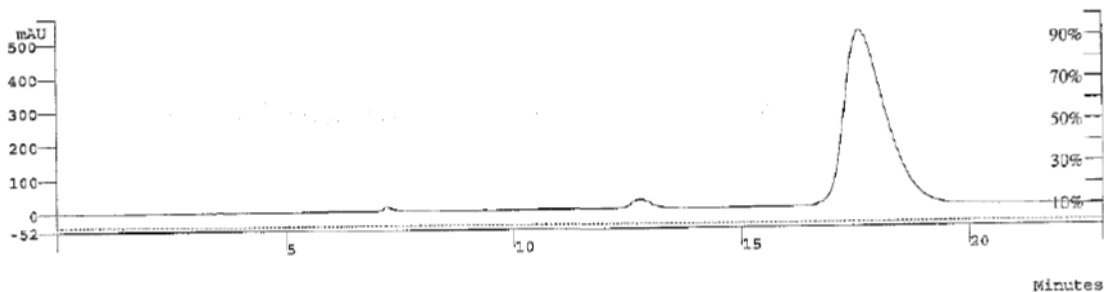

| Peak No       | Peak Name | Result (%)      | Ret. Time (min) | Time Offset (min) | Area (counts)    | Rel Ret Time | Sep. Code | Width 1/2 (sec) | Status Codes | Group |
|---------------|-----------|-----------------|-----------------|-------------------|------------------|--------------|-----------|-----------------|--------------|-------|
| 1             |           | 2.2000          | 12.787          | 0.000             | 3790007          | 0.00         | BB        | 27.3            |              | 0     |
| 2             |           | 97.8000         | 17.613          | 0.000             | 168479248        | 0.00         | BB        | 57.9            |              | 0     |
| <b>Totals</b> |           | <b>100.0000</b> |                 | <b>0.000</b>      | <b>172269248</b> |              |           |                 |              |       |

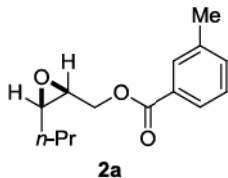

Data File: c:\star\6-14-13 7:04:02 pm -1.run  
 Channel: 2 = 225.00 nm RESULTS  
 Sample ID: cw351rac  
 Operator (Inj): OB-H, hex:IPA=98:2, 1.0 mL/min  
 Injection Date:  
 Injection Method: c:\star\chuan\standard 2%.mth  
 Run Time (min): 22.347  
 Workstation:  
 Instrument (Inj): Varian Star #1

Operator (Calc):  
 Calc Date: 06/14/13 07:27:23 PM  
 Times Calculated: 1  
 Calculation Method: c:\windows\temp\~6-14-13 7:04:02 pm  
 Instrument (Calc): Varian Star #1  
 Run Mode: Analysis  
 Peak Measurement: Peak Area  
 Calculation Type: Percent  
 Calibration Level: N/A  
 Verification Tolerance: N/A

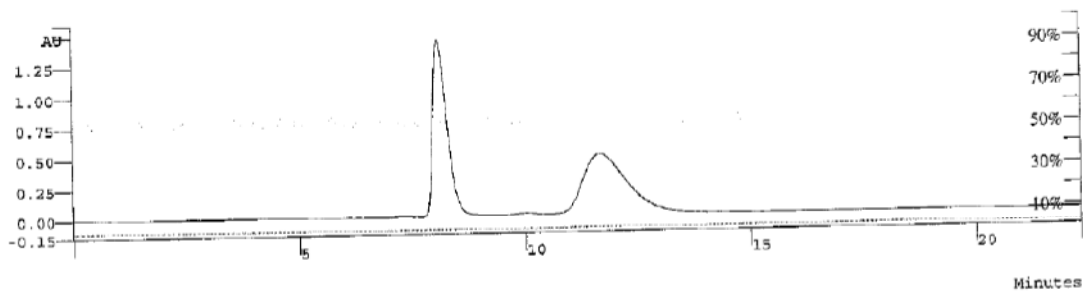

| Peak No       | Peak Name | Result ()       | Ret. Time (min) | Time Offset (min) | Area (counts)    | Rel Ret Time | Sep. Code | Width 1/2 (sec) | Status Codes | Group |
|---------------|-----------|-----------------|-----------------|-------------------|------------------|--------------|-----------|-----------------|--------------|-------|
| 1             |           | 48.7266         | 8.067           | 0.000             | 163505696        | 0.00         | BB        | 20.4            |              | 0     |
| 2             |           | 51.2734         | 11.667          | 0.000             | 172051616        | 0.00         | BB        | 62.8            |              | 0     |
| <b>Totals</b> |           | <b>100.0000</b> |                 | <b>0.000</b>      | <b>335557312</b> |              |           |                 |              |       |

Data File: c:\star\6-15-13 10:49:31 am -1.run  
 Channel: 2 = 225.00 nm RESULTS  
 Sample ID: cw351a  
 Operator (Inj): OB-H, hex:IPA=98:2, 1.0 mL/min  
 Injection Date:  
 Injection Method: c:\star\chuan\standard 2%.mth  
 Run Time (min): 17.147  
 Workstation:  
 Instrument (Inj): Varian Star #1

Operator (Calc):  
 Calc Date: 06/15/13 11:12:18 AM  
 Times Calculated: 1  
 Calculation Method: c:\windows\temp\~6-15-13 10:49:31  
 Instrument (Calc): Varian Star #1  
 Run Mode: Analysis  
 Peak Measurement: Peak Area  
 Calculation Type: Percent  
 Calibration Level: N/A  
 Verification Tolerance: N/A

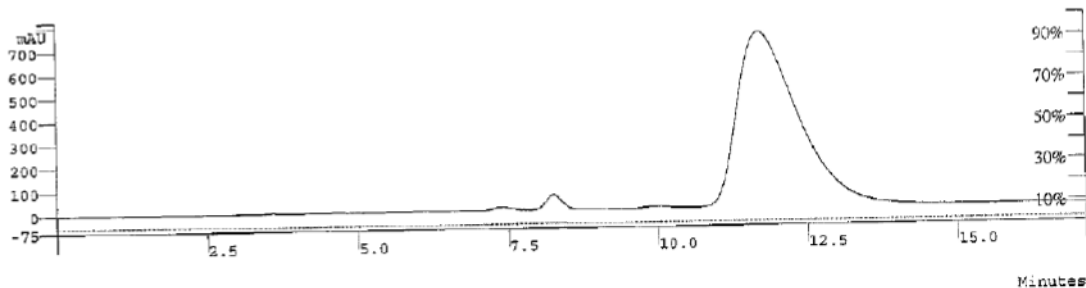

| Peak No       | Peak Name | Result ()       | Ret. Time (min) | Time Offset (min) | Area (counts)    | Rel Ret Time | Sep. Code | Width 1/2 (sec) | Status Codes | Group |
|---------------|-----------|-----------------|-----------------|-------------------|------------------|--------------|-----------|-----------------|--------------|-------|
| 1             |           | 1.9681          | 8.253           | 0.000             | 5407514          | 0.00         | BB        | 16.6            |              | 0     |
| 2             |           | 98.0319         | 11.693          | 0.000             | 269354656        | 0.00         | BB        | 64.7            |              | 0     |
| <b>Totals</b> |           | <b>100.0000</b> |                 | <b>0.000</b>      | <b>274762176</b> |              |           |                 |              |       |

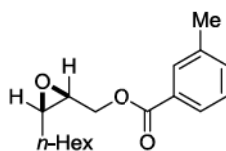

2b

Data File: c:\star\6-13-13 5:49:11 pm -1.run  
 Channel: 2 = 225.00 nm RESULTS  
 Sample ID: cw350rac  
 Operator (Inj): OB-H, hex:IPA=98:2, 0.5 mL/min  
 Injection Date:  
 Injection Method: c:\star\chuan\standard 2% 0.5ml  
 Run Time (min): 39.627  
 Workstation:  
 Instrument (Inj): Varian Star #1

Operator (Calc):  
 Calc Date: 06/13/13 06:29:58 PM  
 Times Calculated: 1  
 Calculation Method: c:\windows\temp\6-13-13 5:49:11 pm  
 Instrument (Calc): Varian Star #1  
 Run Mode: Analysis  
 Peak Measurement: Peak Area  
 Calculation Type: Percent  
 Calibration Level: N/A  
 Verification Tolerance: N/A

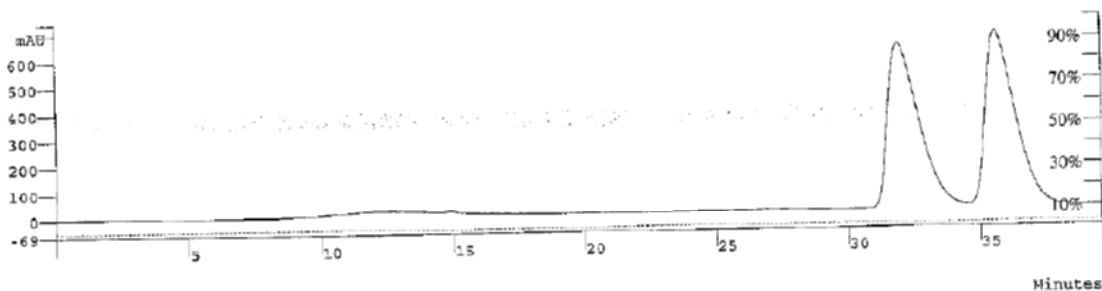

| Peak No       | Peak Name | Result (%)      | Ret. Time (min) | Time Offset (min) | Area (counts)    | Rel Ret Time | Sep. Code | Width 1/2 (sec) | Status Codes | Group |
|---------------|-----------|-----------------|-----------------|-------------------|------------------|--------------|-----------|-----------------|--------------|-------|
| 1             |           | 49.6694         | 31.880          | 0.000             | 257637872        | 0.00         | BB        | 76.4            |              | 0     |
| 2             |           | 50.3306         | 35.587          | 0.000             | 261067216        | 0.00         | BB        | 71.8            |              | 0     |
| <b>Totals</b> |           | <b>100.0000</b> |                 | <b>0.000</b>      | <b>518705088</b> |              |           |                 |              |       |

Data File: c:\star\6-13-13 6:31:56 pm -1.run  
 Channel: 2 = 225.00 nm RESULTS  
 Sample ID: cw350A  
 Operator (Inj): OB-h, hex:IPA=98:2, .05 mL/min  
 Injection Date:  
 Injection Method: c:\star\chuan\standard 2% 0.5ml  
 Run Time (min): 41.280  
 Workstation:  
 Instrument (Inj): Varian Star #1

Operator (Calc):  
 Calc Date: 06/13/13 07:14:06 PM  
 Times Calculated: 1  
 Calculation Method: c:\windows\temp\6-13-13 6:31:56 pm  
 Instrument (Calc): Varian Star #1  
 Run Mode: Analysis  
 Peak Measurement: Peak Area  
 Calculation Type: Percent  
 Calibration Level: N/A  
 Verification Tolerance: N/A

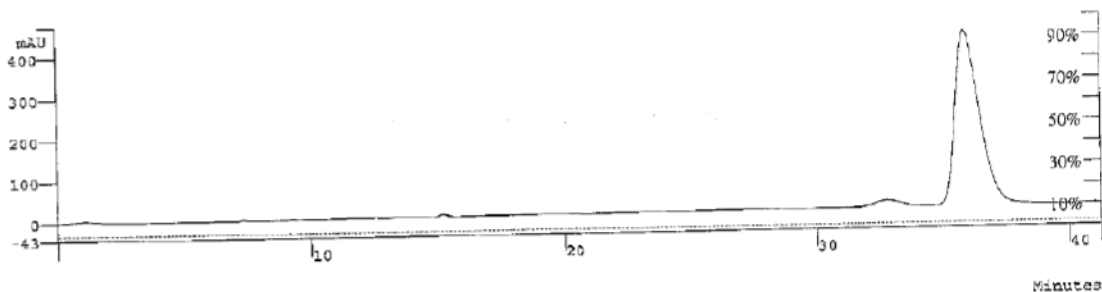

| Peak No       | Peak Name | Result (%)      | Ret. Time (min) | Time Offset (min) | Area (counts)    | Rel Ret Time | Sep. Code | Width 1/2 (sec) | Status Codes | Group |
|---------------|-----------|-----------------|-----------------|-------------------|------------------|--------------|-----------|-----------------|--------------|-------|
| 1             |           | 3.4503          | 32.760          | 0.000             | 5225233          | 0.00         | BB        | 64.4            |              | 0     |
| 2             |           | 96.5497         | 35.880          | 0.000             | 146216448        | 0.00         | BB        | 61.8            |              | 0     |
| <b>Totals</b> |           | <b>100.0000</b> |                 | <b>0.000</b>      | <b>151441680</b> |              |           |                 |              |       |

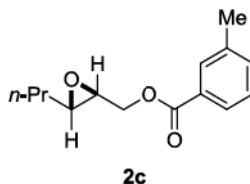

Data File: c:\star\6-15-13 9:11:54 am -1.run  
 Channel: 2 = 225.00 nm RESULTS  
 Sample ID: cw352rac  
 Operator (Inj): OB-H, hex:IPA=98:2, 1.0 mL/min  
 Injection Date:  
 Injection Method: c:\star\chuan\standard 2%.mth  
 Run Time (min): 11.520  
 Workstation:  
 Instrument (Inj): Varian Star #1

Operator (Calc):  
 Calc Date: 06/15/13 10:02:14 AM  
 Times Calculated: 1  
 Calculation Method: c:\windows\temp\--6-15-13 9:11:54 am  
 Instrument (Calc): Varian Star #1  
 Run Mode: Analysis  
 Peak Measurement: Peak Area  
 Calculation Type: Percent  
 Calibration Level: N/A  
 Verification Tolerance: N/A

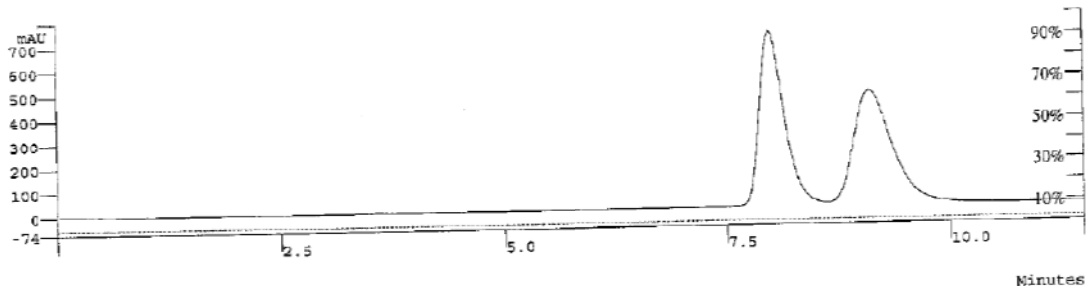

| Peak No       | Peak Name | Result (%)      | Ret. Time (min) | Time Offset (min) | Area (counts)    | Rel Ret Time | Sep. Code | Width 1/2 (sec) | Status Codes | Group |
|---------------|-----------|-----------------|-----------------|-------------------|------------------|--------------|-----------|-----------------|--------------|-------|
| 1             |           | 50.1984         | 7.987           | 0.000             | 70649136         | 0.00         | BB        | 17.6            |              | 0     |
| 2             |           | 49.8016         | 9.107           | 0.000             | 70090760         | 0.00         | BB        | 26.6            |              | 0     |
| <b>Totals</b> |           | <b>100.0000</b> |                 | <b>0.000</b>      | <b>140739904</b> |              |           |                 |              |       |

Data File: c:\star\6-15-13 11:24:08 am -1.run  
 Channel: 2 = 225.00 nm RESULTS  
 Sample ID: cw352a  
 Operator (Inj): OB-H, hex:IPA= 98:2, 1.0 mL/min  
 Injection Date:  
 Injection Method: c:\star\chuan\standard 2%.mth  
 Run Time (min): 11.893  
 Workstation:  
 Instrument (Inj): Varian Star #1

Operator (Calc):  
 Calc Date: 06/15/13 11:38:03 AM  
 Times Calculated: 1  
 Calculation Method: c:\windows\temp\--6-15-13 11:24:08  
 Instrument (Calc): Varian Star #1  
 Run Mode: Analysis  
 Peak Measurement: Peak Area  
 Calculation Type: Percent  
 Calibration Level: N/A  
 Verification Tolerance: N/A

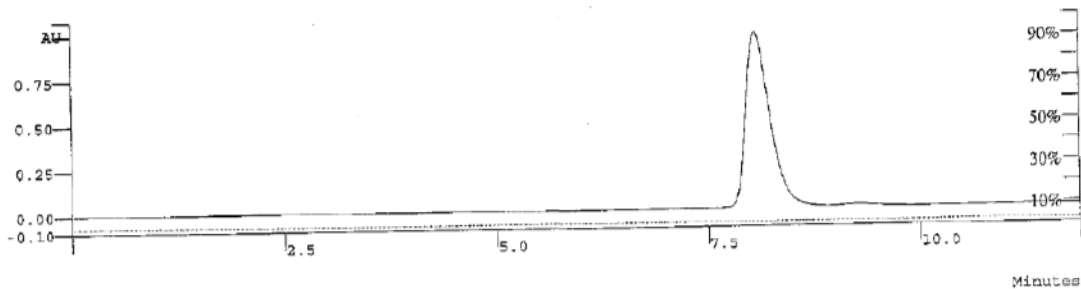

| Peak No       | Peak Name | Result (%)      | Ret. Time (min) | Time Offset (min) | Area (counts)   | Rel Ret Time | Sep. Code | Width 1/2 (sec) | Status Codes | Group |
|---------------|-----------|-----------------|-----------------|-------------------|-----------------|--------------|-----------|-----------------|--------------|-------|
| 1             |           | 99.2600         | 8.067           | 0.000             | 97840952        | 0.00         | BB        | 17.9            |              | 0     |
| 2             |           | 0.7400          | 9.240           | 0.000             | 729414          | 0.00         | BB        | 15.6            |              | 0     |
| <b>Totals</b> |           | <b>100.0000</b> |                 | <b>0.000</b>      | <b>98570368</b> |              |           |                 |              |       |

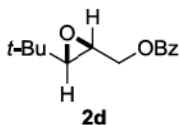



Data File: c:\star\6-28-13 6:50:08 pm -1.run  
 Channel: 1 = 254.00 nm RESULTS  
 Sample ID: cw366rac  
 Operator (Inj): OB-H, hex:IPA=98:2, 1.0 mL/min  
 Injection Date:  
 Injection Method: c:\star\chuan\standard 2%.mth  
 Run Time (min): 16.533  
 Workstation:  
 Instrument (Inj): Varian Star #1

Operator (Calc):  
 Calc Date: 06/28/13 07:36:22 PM  
 Times Calculated: 1  
 Calculation Method: c:\windows\temp\6-28-13 7:08:36 pm  
 Instrument (Calc): Varian Star #1  
 Run Mode: Analysis  
 Peak Measurement: Peak Area  
 Calculation Type: Percent  
 Calibration Level: N/A  
 Verification Tolerance: N/A

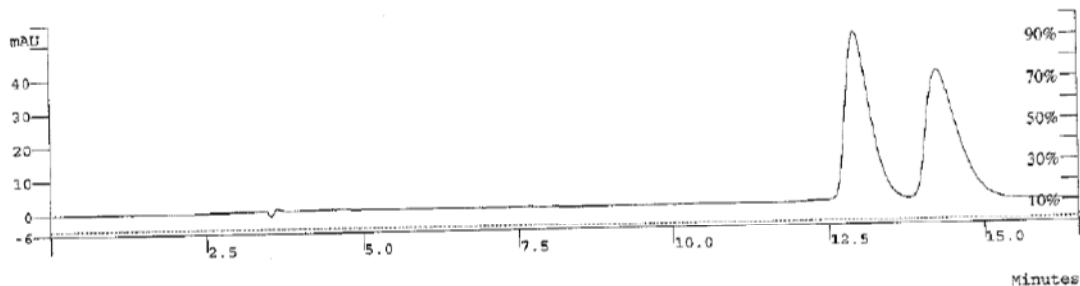

| Peak No       | Peak Name | Result (%)      | Ret. Time (min) | Time Offset (min) | Area (counts)   | Rel Ret Time | Sep. Code | Width 1/2 (sec) | Status Codes | Group |
|---------------|-----------|-----------------|-----------------|-------------------|-----------------|--------------|-----------|-----------------|--------------|-------|
| 1             |           | 50.3672         | 12.920          | 0.000             | 6900983         | 0.00         | BB        | 25.3            |              | 0     |
| 2             |           | 49.6328         | 14.253          | 0.000             | 6800351         | 0.00         | BB        | 32.0            |              | 0     |
| <b>Totals</b> |           | <b>100.0000</b> |                 | <b>0.000</b>      | <b>13701334</b> |              |           |                 |              |       |

Data File: c:\star\6-28-13 7:08:36 pm -1.run  
 Channel: 2 = 225.00 nm RESULTS  
 Sample ID: cw366a  
 Operator (Inj): OB-H, hex:IPA=98:2, 1.0 mL/min  
 Injection Date:  
 Injection Method: c:\star\chuan\standard 2%.mth  
 Run Time (min): 24.693  
 Workstation:  
 Instrument (Inj): Varian Star #1

Operator (Calc):  
 Calc Date: 06/28/13 07:34:18 PM  
 Times Calculated: 1  
 Calculation Method: c:\windows\temp\6-28-13 7:08:36 pm  
 Instrument (Calc): Varian Star #1  
 Run Mode: Analysis  
 Peak Measurement: Peak Area  
 Calculation Type: Percent  
 Calibration Level: N/A  
 Verification Tolerance: N/A

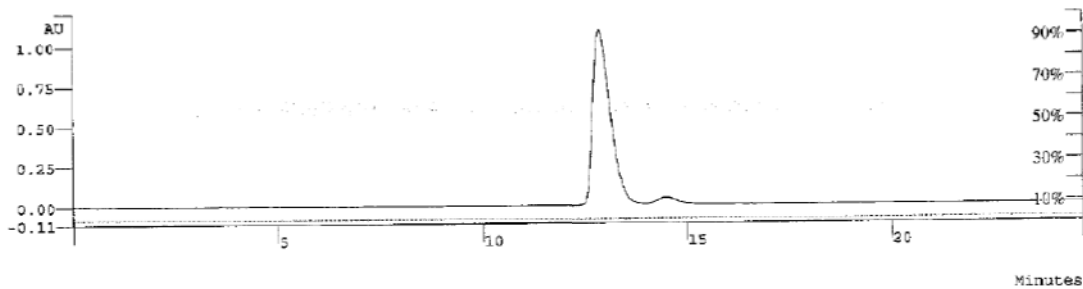

| Peak No       | Peak Name | Result (%)      | Ret. Time (min) | Time Offset (min) | Area (counts)    | Rel Ret Time | Sep. Code | Width 1/2 (sec) | Status Codes | Group |
|---------------|-----------|-----------------|-----------------|-------------------|------------------|--------------|-----------|-----------------|--------------|-------|
| 1             |           | 96.9515         | 12.840          | 0.000             | 163261904        | 0.00         | BB        | 27.3            |              | 0     |
| 2             |           | 3.0485          | 14.467          | 0.000             | 5133586          | 0.00         | BB        | 25.1            |              | 0     |
| <b>Totals</b> |           | <b>100.0000</b> |                 | <b>0.000</b>      | <b>168395488</b> |              |           |                 |              |       |

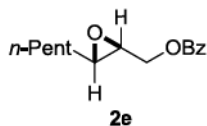

Data File: c:\star\7-17-13 10:51:01 am -1.run  
 Channel: 2 = 225.00 nm RESULTS  
 Sample ID: cw395rac  
 Operator (Inj): OD-H, hex:IPA= 95:5, 1.0 mL/min  
 Injection Date:  
 Injection Method: c:\star\chuan\standard 5%.mth  
 Run Time (min): 43.280  
 Workstation:  
 Instrument (Inj): Varian Star #1

Operator (Calc):  
 Calc Date: 07/17/13 11:35:55 AM  
 Times Calculated: 1  
 Calculation Method: c:\windows\temp\7-17-13 10:51:01  
 Instrument (Calc): Varian Star #1  
 Run Mode: Analysis  
 Peak Measurement: Peak Area  
 Calculation Type: Percent  
 Calibration Level: N/A  
 Verification Tolerance: N/A

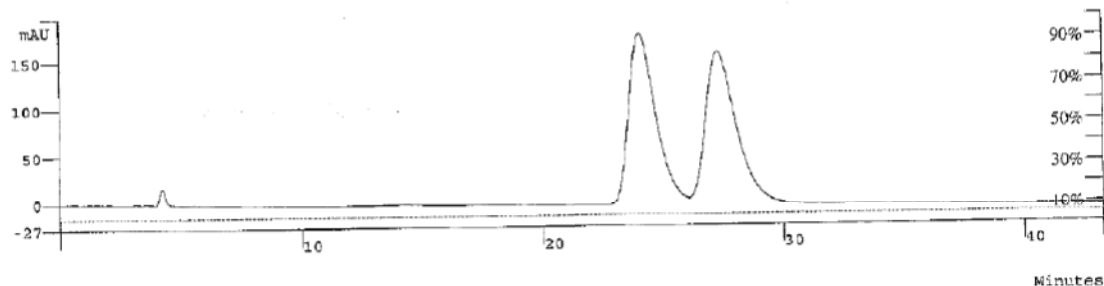

| Peak No       | Peak Name | Result (%)      | Ret. Time (min) | Time Offset (min) | Area (counts)    | Rel Ret Time | Sep. Code | Width 1/2 (sec) | Status Codes | Group |
|---------------|-----------|-----------------|-----------------|-------------------|------------------|--------------|-----------|-----------------|--------------|-------|
| 1             |           | 50.0151         | 24.040          | 0.000             | 68615864         | 0.00         | BB        | 72.2            |              | 0     |
| 2             |           | 49.9849         | 27.293          | 0.000             | 68574440         | 0.00         | BB        | 78.1            |              | 0     |
| <b>Totals</b> |           | <b>100.0000</b> |                 | <b>0.000</b>      | <b>137190304</b> |              |           |                 |              |       |

Data File: c:\star\7-18-13 6:33:22 pm -1.run  
 Channel: 2 = 225.00 nm RESULTS  
 Sample ID: cw395b  
 Operator (Inj): OD-H, hex:IPA= 95:5, 1.0 mL/min  
 Injection Date:  
 Injection Method: c:\star\chuan\standard 5%.mth  
 Run Time (min): 30.107  
 Workstation:  
 Instrument (Inj): Varian Star #1

Operator (Calc):  
 Calc Date: 07/18/13 07:04:41 PM  
 Times Calculated: 1  
 Calculation Method: c:\windows\temp\7-18-13 6:33:22 pm  
 Instrument (Calc): Varian Star #1  
 Run Mode: Analysis  
 Peak Measurement: Peak Area  
 Calculation Type: Percent  
 Calibration Level: N/A  
 Verification Tolerance: N/A

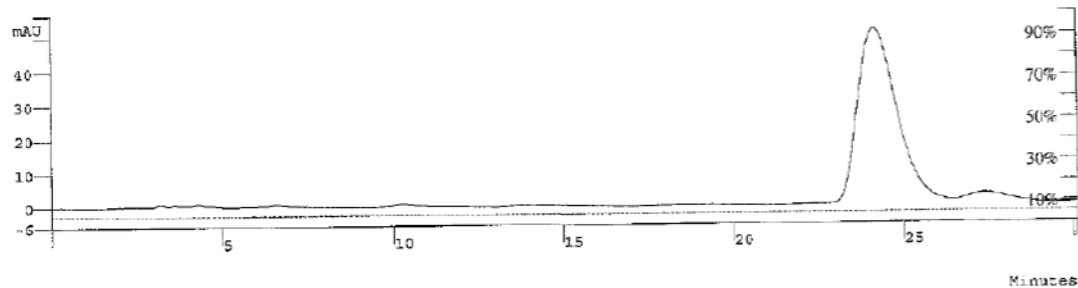

| Peak No       | Peak Name | Result (%)      | Ret. Time (min) | Time Offset (min) | Area (counts)   | Rel Ret Time | Sep. Code | Width 1/2 (sec) | Status Codes | Group |
|---------------|-----------|-----------------|-----------------|-------------------|-----------------|--------------|-----------|-----------------|--------------|-------|
| 1             |           | 96.7354         | 24.120          | 0.000             | 20666868        | 0.00         | BB        | 74.6            |              | 0     |
| 2             |           | 3.2646          | 27.373          | 0.000             | 697454          | 0.00         | BB        | 57.0            |              | 0     |
| <b>Totals</b> |           | <b>100.0000</b> |                 | <b>0.000</b>      | <b>21364322</b> |              |           |                 |              |       |

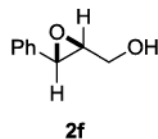

Data File: c:\star\7-28-13 11:07:09 am -1.run  
 Channel: 2 = 225.00 nm RESULTS  
 Sample ID: cw411rac  
 Operator (Inj): OJ-H, hex:IPA= 97.5:2.5, 1.0  
 Injection Date: mL/min  
 Injection Method: c:\star\chuan\standard 7.5%.mth  
 Run Time (min): 25.653  
 Workstation:  
 Instrument (Inj): Varian Star #1

Operator (Calc):  
 Calc Date: 07/28/13 11:37:02 AM  
 Times Calculated: 1  
 Calculation Method: c:\windows\temp\~7-28-13 11:07:09  
 Instrument (Calc): Varian Star #1  
 Run Mode: Analysis  
 Peak Measurement: Peak Area  
 Calculation Type: Percent  
 Calibration Level: N/A  
 Verification Tolerance: N/A

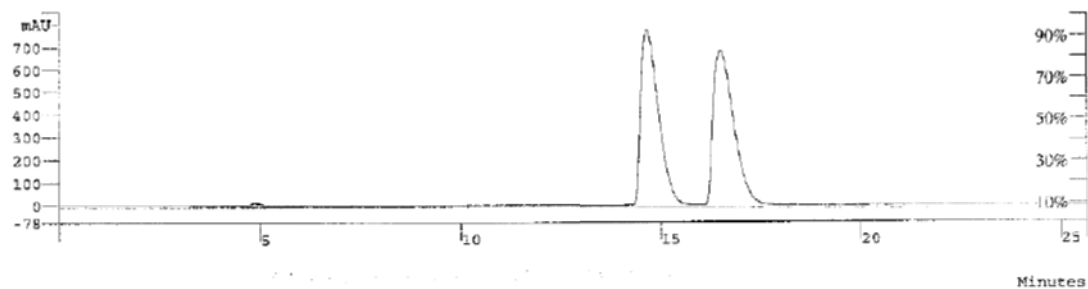

| Peak No       | Peak Name | Result (%)      | Ret. Time (min) | Time Offset (min) | Area (counts)    | Rel Ret Time | Sep. Code | Width 1/2 (sec) | Status Codes | Group |
|---------------|-----------|-----------------|-----------------|-------------------|------------------|--------------|-----------|-----------------|--------------|-------|
| 1             |           | 50.0185         | 14.653          | 0.000             | 121827328        | 0.00         | BB        | 28.9            |              | 0     |
| 2             |           | 49.9815         | 16.493          | 0.000             | 121737288        | 0.00         | BB        | 33.1            |              | 0     |
| <b>Totals</b> |           | <b>100.0000</b> |                 | <b>0.000</b>      | <b>243564608</b> |              |           |                 |              |       |

Data File: c:\star\7-28-13 11:35:58 am -1.run  
 Channel: 2 = 225.00 nm RESULTS  
 Sample ID: cw411a  
 Operator (Inj): OJ-H, hex:IPA= 97.5:2.5, 1.0  
 Injection Date: mL/min  
 Injection Method: c:\star\chuan\standard 7.5%.mth  
 Run Time (min): 19.147  
 Workstation:  
 Instrument (Inj): Varian Star #1

Operator (Calc):  
 Calc Date: 07/28/13 11:56:14 AM  
 Times Calculated: 1  
 Calculation Method: c:\windows\temp\~7-28-13 11:35:58  
 Instrument (Calc): Varian Star #1  
 Run Mode: Analysis  
 Peak Measurement: Peak Area  
 Calculation Type: Percent  
 Calibration Level: N/A  
 Verification Tolerance: N/A

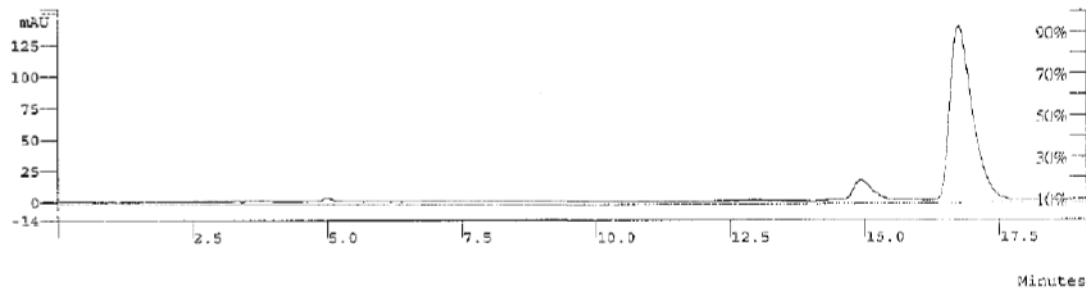

| Peak No       | Peak Name | Result (%)      | Ret. Time (min) | Time Offset (min) | Area (counts)   | Rel Ret Time | Sep. Code | Width 1/2 (sec) | Status Codes | Group |
|---------------|-----------|-----------------|-----------------|-------------------|-----------------|--------------|-----------|-----------------|--------------|-------|
| 1             |           | 8.2426          | 14.920          | 0.000             | 1840808         | 0.00         | BB        | 20.8            |              | 0     |
| 2             |           | 91.7574         | 16.733          | 0.000             | 20492092        | 0.00         | BB        | 26.5            |              | 0     |
| <b>Totals</b> |           | <b>100.0000</b> |                 | <b>0.000</b>      | <b>22332900</b> |              |           |                 |              |       |

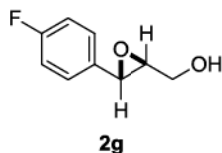

Data File: c:\star\6-20-13 3:37:59 pm -1.run  
 Channel: 2 = 225.00 nm RESULTS  
 Sample ID: cw360rac  
 Operator (Inj): OD-H, hex:IPA=95:5, 1.0 mL/min  
 Injection Date:  
 Injection Method: c:\star\chuan\standard 5%.mth  
 Run Time (min): 34.747  
 Workstation:  
 Instrument (Inj): Varian Star #1

Operator (Calc):  
 Calc Date: 06/20/13 04:16:04 PM  
 Times Calculated: 1  
 Calculation Method: c:\windows\temp\6-20-13 3:37:59 pm  
 Instrument (Calc): Varian Star #1  
 Run Mode: Analysis  
 Peak Measurement: Peak Area  
 Calculation Type: Percent  
 Calibration Level: N/A  
 Verification Tolerance: N/A

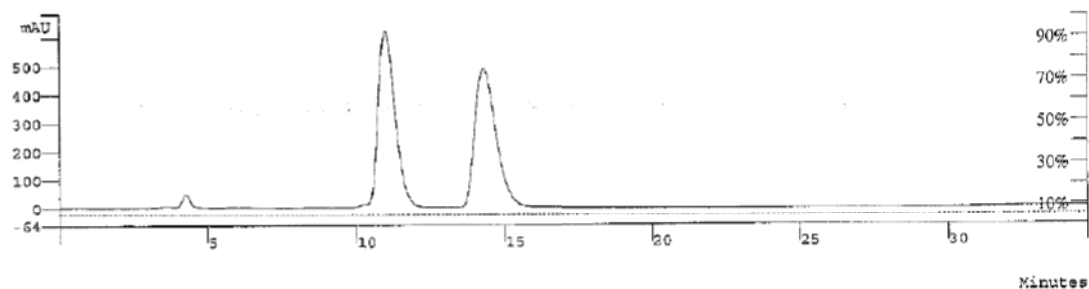

| Peak No       | Peak Name | Result ()       | Ret. Time (min) | Time Offset (min) | Area (counts)    | Rel Ret Time | Sep. Code | Width 1/2 (sec) | Status Codes | Group |
|---------------|-----------|-----------------|-----------------|-------------------|------------------|--------------|-----------|-----------------|--------------|-------|
| 1             |           | 50.6567         | 10.973          | 0.000             | 127222736        | 0.00         | BB        | 37.0            |              | 0     |
| 2             |           | 49.3433         | 14.280          | 0.000             | 123924416        | 0.00         | BB        | 46.5            |              | 0     |
| <b>Totals</b> |           | <b>100.0000</b> |                 | <b>0.000</b>      | <b>251147152</b> |              |           |                 |              |       |

Data File: c:\star\6-20-13 7:13:54 pm -1.run  
 Channel: 2 = 225.00 nm RESULTS  
 Sample ID: cw360A  
 Operator (Inj): OD-H, hex:IPA=95:5, 1.0 mL/min  
 Injection Date:  
 Injection Method: c:\star\chuan\standard 5%.mth  
 Run Time (min): 18.533  
 Workstation:  
 Instrument (Inj): Varian Star #1

Operator (Calc):  
 Calc Date: 06/20/13 07:33:19 PM  
 Times Calculated: 1  
 Calculation Method: c:\windows\temp\6-20-13 7:13:54 pm  
 Instrument (Calc): Varian Star #1  
 Run Mode: Analysis  
 Peak Measurement: Peak Area  
 Calculation Type: Percent  
 Calibration Level: N/A  
 Verification Tolerance: N/A

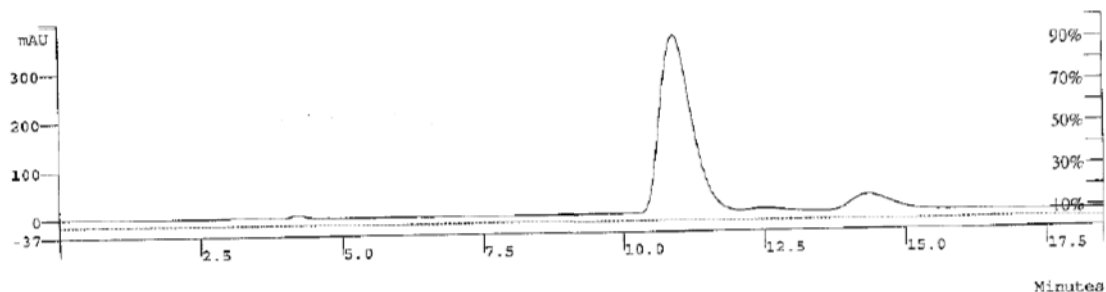

| Peak No       | Peak Name | Result ()       | Ret. Time (min) | Time Offset (min) | Area (counts)   | Rel Ret Time | Sep. Code | Width 1/2 (sec) | Status Codes | Group |
|---------------|-----------|-----------------|-----------------|-------------------|-----------------|--------------|-----------|-----------------|--------------|-------|
| 1             |           | 91.8708         | 10.893          | 0.000             | 72572808        | 0.00         | BB        | 36.8            |              | 0     |
| 2             |           | 8.1292          | 14.333          | 0.000             | 6421587         | 0.00         | BB        | 42.4            |              | 0     |
| <b>Totals</b> |           | <b>100.0000</b> |                 | <b>0.000</b>      | <b>78994392</b> |              |           |                 |              |       |

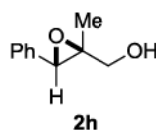

Data File: c:\star\7-5-13 3;12;28 pm -1.run  
 Channel: 2 = 225.00 nm RESULTS  
 Sample ID: cw379rac  
 Operator (Inj): OD-H, hex:IPA= 95:5, 1.0 mL/min  
 Injection Date:  
 Injection Method: c:\star\chuan\standard 5%.mth  
 Run Time (min): 24.133  
 Workstation:  
 Instrument (Inj): Varian Star #1

Operator (Calc):  
 Calc Date: 07/05/13 03:37:26 PM  
 Times Calculated: 1  
 Calculation Method: c:\windows\temp\~7-5-13 3;12;28 pm  
 Instrument (Calc): Varian Star #1  
 Run Mode: Analysis  
 Peak Measurement: Peak Area  
 Calculation Type: Percent  
 Calibration Level: N/A  
 Verification Tolerance: N/A

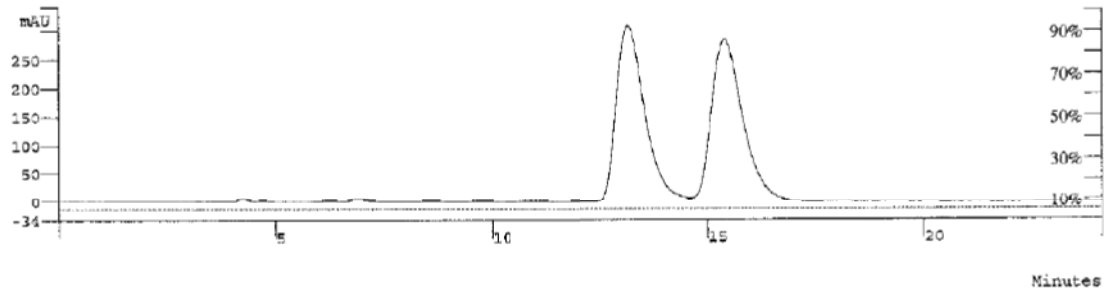

| Peak No       | Peak Name | Result (%)      | Ret. Time (min) | Time Offset (min) | Area (counts)    | Rel Ret Time | Sep. Code | Width 1/2 (sec) | Status Codes | Group |
|---------------|-----------|-----------------|-----------------|-------------------|------------------|--------------|-----------|-----------------|--------------|-------|
| 1             |           | 49.9041         | 13.160          | 0.000             | 71353808         | 0.00         | BB        | 42.2            |              | 0     |
| 2             |           | 50.0959         | 15.373          | 0.000             | 71628032         | 0.00         | BB        | 45.6            |              | 0     |
| <b>Totals</b> |           | <b>100.0000</b> |                 | <b>0.000</b>      | <b>142981840</b> |              |           |                 |              |       |

Data File: c:\star\7-5-13 3;55;08 pm -1.run  
 Channel: 2 = 225.00 nm RESULTS  
 Sample ID: cw379a  
 Operator (Inj): OD-H, hex:IPA=95:5, 1.0 mL/min  
 Injection Date:  
 Injection Method: c:\star\chuan\standard 5%.mth  
 Run Time (min): 19.440  
 Workstation:  
 Instrument (Inj): Varian Star #1

Operator (Calc):  
 Calc Date: 07/05/13 04:16:00 PM  
 Times Calculated: 1  
 Calculation Method: c:\windows\temp\~7-5-13 3;55;08 pm  
 Instrument (Calc): Varian Star #1  
 Run Mode: Analysis  
 Peak Measurement: Peak Area  
 Calculation Type: Percent  
 Calibration Level: N/A  
 Verification Tolerance: N/A

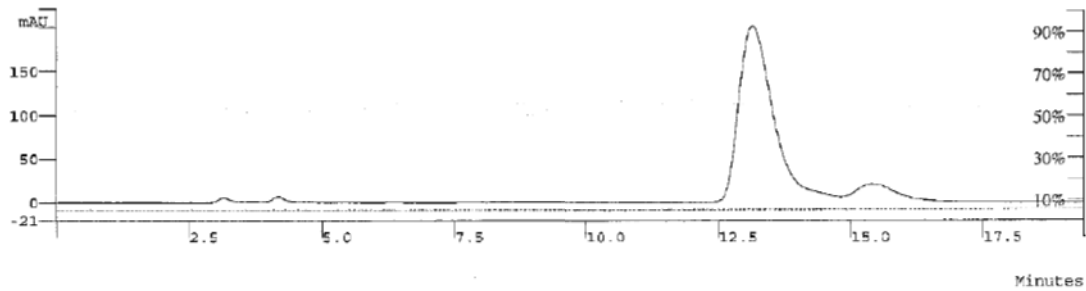

| Peak No       | Peak Name | Result (%)     | Ret. Time (min) | Time Offset (min) | Area (counts)   | Rel Ret Time | Sep. Code | Width 1/2 (sec) | Status Codes | Group |
|---------------|-----------|----------------|-----------------|-------------------|-----------------|--------------|-----------|-----------------|--------------|-------|
| 1             |           | 93.0695        | 13.160          | 0.000             | 44928284        | 0.00         | BB        | 40.7            |              | 0     |
| 2             |           | 6.9304         | 15.400          | 0.000             | 3345597         | 0.00         | BB        | 37.6            |              | 0     |
| <b>Totals</b> |           | <b>99.9999</b> |                 | <b>0.000</b>      | <b>48273880</b> |              |           |                 |              |       |

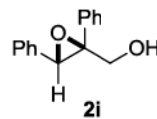

Data File: c:\star\6-21-13 5:37:04 pm -1.run  
 Channel: 2 = 225.00 nm RESULTS  
 Sample ID: cw358rac  
 Operator (Inj): OJ-H, hex:IPA=99:1, 1.0 mL/min  
 Injection Date:  
 Injection Method: c:\star\chuan\standard 1%.mth  
 Run Time (min): 13.840  
 Workstation:  
 Instrument (Inj): Varian Star #1

Operator (Calc):  
 Calc Date: 06/21/13 05:51:50 PM  
 Times Calculated: 1  
 Calculation Method: c:\windows\temp\~6-21-13 5:37:04 pm  
 Instrument (Calc): Varian Star #1  
 Run Mode: Analysis  
 Peak Measurement: Peak Area  
 Calculation Type: Percent  
 Calibration Level: N/A  
 Verification Tolerance: N/A

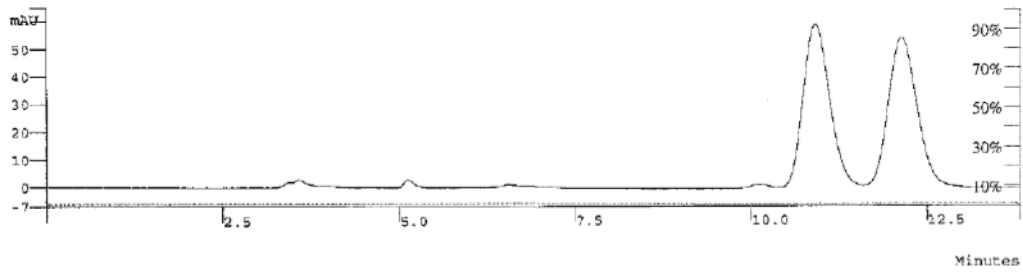

| Peak No       | Peak Name | Result (%)      | Ret. Time (min) | Time Offset (min) | Area (counts)   | Rel Ret Time | Sep. Code | Width 1/2 (sec) | Status Codes | Group |
|---------------|-----------|-----------------|-----------------|-------------------|-----------------|--------------|-----------|-----------------|--------------|-------|
| 1             |           | 50.3361         | 10.920          | 0.000             | 7731413         | 0.00         | BB        | 24.1            |              | 0     |
| 2             |           | 49.6639         | 12.120          | 0.000             | 7628171         | 0.00         | BB        | 25.7            |              | 0     |
| <b>Totals</b> |           | <b>100.0000</b> |                 | <b>0.000</b>      | <b>15359584</b> |              |           |                 |              |       |

Data File: c:\star\6-22-13 9:03:29 am -1.run  
 Channel: 2 = 225.00 nm RESULTS  
 Sample ID: cw358A  
 Operator (Inj): OJ-H, hex:IPA= 99:1, 1.0 mL/min  
 Injection Date:  
 Injection Method: c:\star\chuan\standard 1%.mth  
 Run Time (min): 15.360  
 Workstation:  
 Instrument (Inj): Varian Star #1

Operator (Calc):  
 Calc Date: 06/22/13 09:19:45 AM  
 Times Calculated: 1  
 Calculation Method: c:\windows\temp\~6-22-13 9:03:29 am  
 Instrument (Calc): Varian Star #1  
 Run Mode: Analysis  
 Peak Measurement: Peak Area  
 Calculation Type: Percent  
 Calibration Level: N/A  
 Verification Tolerance: N/A

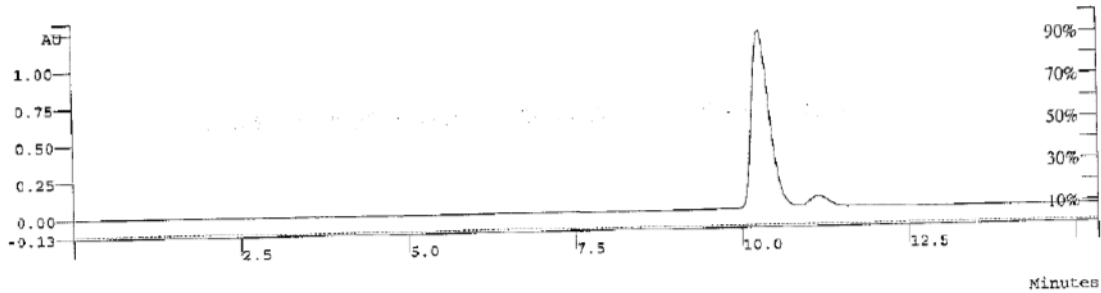

| Peak No       | Peak Name | Result (%)      | Ret. Time (min) | Time Offset (min) | Area (counts)    | Rel Ret Time | Sep. Code | Width 1/2 (sec) | Status Codes | Group |
|---------------|-----------|-----------------|-----------------|-------------------|------------------|--------------|-----------|-----------------|--------------|-------|
| 1             |           | 96.0696         | 10.280          | 0.000             | 109252344        | 0.00         | BB        | 16.9            |              | 0     |
| 2             |           | 3.9304          | 11.160          | 0.000             | 4459776          | 0.00         | BB        | 13.7            |              | 0     |
| <b>Totals</b> |           | <b>100.0000</b> |                 | <b>0.000</b>      | <b>113722120</b> |              |           |                 |              |       |

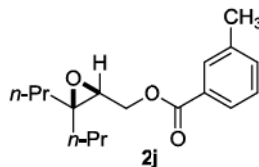

Data File: c:\star\12-20-13 3:55:43 pm -1.run  
 Channel: 3 = 210.00 nm RESULTS  
 Sample ID: cw372rac  
 Operator (Inj): IC, hex:IPA=97:3, 1.0 mL/min  
 Injection Date:  
 Injection Method: c:\star\chuan\standard 3%.mth  
 Run Time (min): 43.760  
 Workstation:  
 Instrument (Inj): Varian Star #1

Operator (Calc):  
 Calc Date: 12/20/13 04:40:28 PM  
 Times Calculated: 1  
 Calculation Method: c:\windows\temp\~12-20-13 3:55:43  
 Instrument (Calc): Varian Star #1  
 Run Mode: Analysis  
 Peak Measurement: Peak Area  
 Calculation Type: Percent  
 Calibration Level: N/A  
 Verification Tolerance: N/A

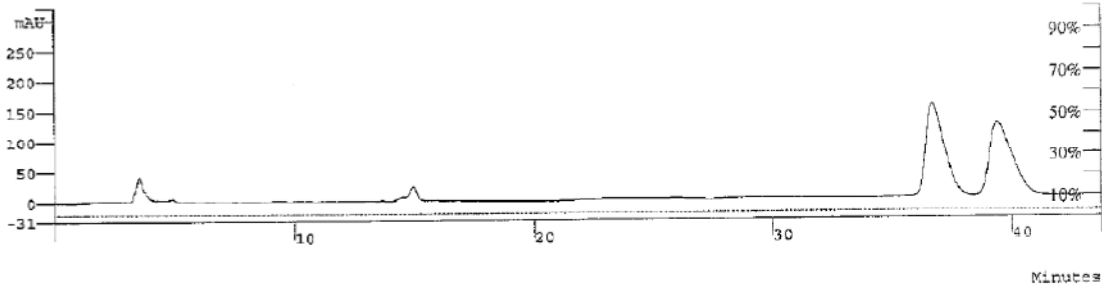

| Peak No       | Peak Name | Result (%)      | Ret. Time (min) | Time Offset (min) | Area (counts)   | Rel Ret Time | Sep. Code | Width 1/2 (sec) | Status Codes | Group |
|---------------|-----------|-----------------|-----------------|-------------------|-----------------|--------------|-----------|-----------------|--------------|-------|
| 1             |           | 51.1251         | 36.680          | 0.000             | 42075612        | 0.00         | BB        | 49.7            |              | 0     |
| 2             |           | 48.8749         | 39.373          | 0.000             | 40223668        | 0.00         | BB        | 60.5            |              | 0     |
| <b>Totals</b> |           | <b>100.0000</b> |                 | <b>0.000</b>      | <b>82299280</b> |              |           |                 |              |       |

Data File: c:\star\12-20-13 4:42:28 pm -1.run  
 Channel: 3 = 210.00 nm RESULTS  
 Sample ID: cw372a  
 Operator (Inj): IC, hex:IPA=97:3, 1.0 mL/min  
 Injection Date:  
 Injection Method: c:\star\chuan\standard 3%.mth  
 Run Time (min): 42.747  
 Workstation:  
 Instrument (Inj): Varian Star #1

Operator (Calc):  
 Calc Date: 12/20/13 05:27:08 PM  
 Times Calculated: 2  
 Calculation Method: c:\windows\temp\~12-20-13 4:42:28  
 Instrument (Calc): Varian Star #1  
 Run Mode: Analysis  
 Peak Measurement: Peak Area  
 Calculation Type: Percent  
 Calibration Level: N/A  
 Verification Tolerance: N/A

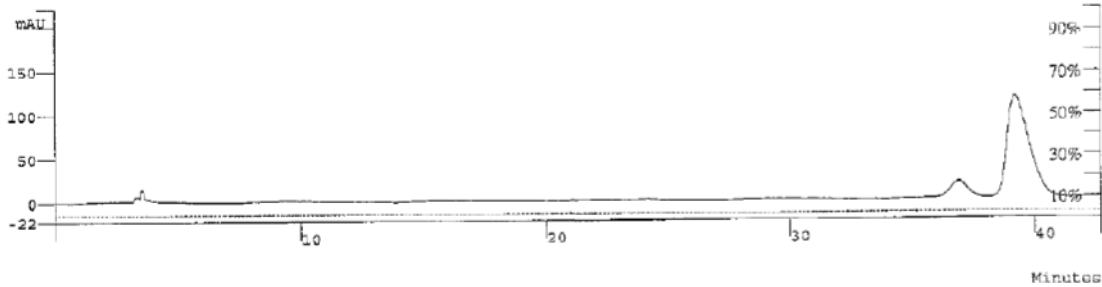

| Peak No       | Peak Name | Result (%)      | Ret. Time (min) | Time Offset (min) | Area (counts)   | Rel Ret Time | Sep. Code | Width 1/2 (sec) | Status Codes | Group |
|---------------|-----------|-----------------|-----------------|-------------------|-----------------|--------------|-----------|-----------------|--------------|-------|
| 1             |           | 8.0587          | 36.867          | 0.000             | 3246977         | 0.00         | BB        | 37.7            |              | 0     |
| 2             |           | 91.9413         | 39.187          | 0.000             | 37044600        | 0.00         | BB        | 58.3            |              | 0     |
| <b>Totals</b> |           | <b>100.0000</b> |                 | <b>0.000</b>      | <b>40291576</b> |              |           |                 |              |       |

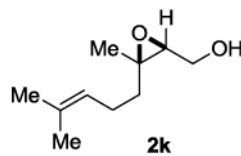

Data File: c:\star\10-1-13 2;42;11 pm -1.run  
 Channel: 2 = 225.00 nm RESULTS  
 Sample ID: cw450rac  
 Operator (Inj): OB-H, hex:IPA=99:1, 1.0 mL/min  
 Injection Date:  
 Injection Method: c:\star\chuan\standard 1%.mth  
 Run Time (min): 20.880  
 Workstation:  
 Instrument (Inj): Varian Star #1

Operator (Calc):  
 Calc Date: 10/01/13 03:04:46 PM  
 Times Calculated: 1  
 Calculation Method: c:\windows\temp\~10-1-13 2;42;11 pm  
 Instrument (Calc): Varian Star #1  
 Run Mode: Analysis  
 Peak Measurement: Peak Area  
 Calculation Type: Percent  
 Calibration Level: N/A  
 Verification Tolerance: N/A

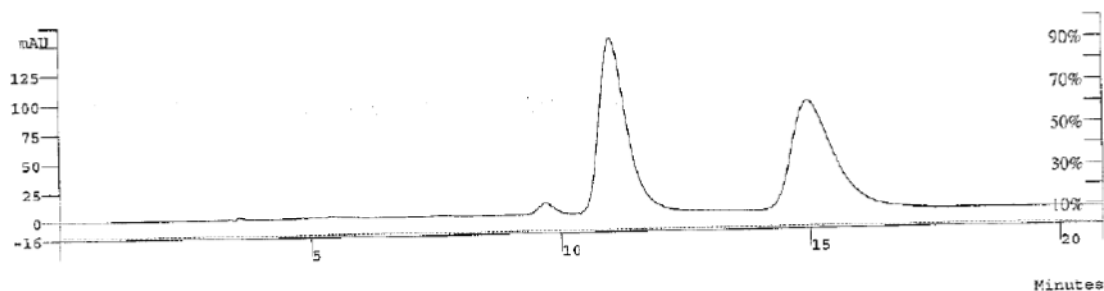

| Peak No       | Peak Name | Result (%)      | Ret. Time (min) | Time Offset (min) | Area (counts)   | Rel Ret Time | Sep. Code | Width 1/2 (sec) | Status Codes | Group |
|---------------|-----------|-----------------|-----------------|-------------------|-----------------|--------------|-----------|-----------------|--------------|-------|
| 1             |           | 50.4762         | 11.027          | 0.000             | 29271514        | 0.00         | BB        | 34.5            |              | 0     |
| 2             |           | 49.5238         | 14.947          | 0.000             | 28719262        | 0.00         | BB        | 53.2            |              | 0     |
| <b>Totals</b> |           | <b>100.0000</b> |                 | <b>0.000</b>      | <b>57990776</b> |              |           |                 |              |       |

Data File: c:\star\10-1-13 2;17;27 pm -1.run  
 Channel: 2 = 225.00 nm RESULTS  
 Sample ID: cw450b  
 Operator (Inj): OB-H, hex:IPA=99:1, 1.0 mL/min  
 Injection Date:  
 Injection Method: c:\star\chuan\standard 1%.mth  
 Run Time (min): 21.227  
 Workstation:  
 Instrument (Inj): Varian Star #1

Operator (Calc):  
 Calc Date: 10/01/13 02:39:45 PM  
 Times Calculated: 1  
 Calculation Method: c:\windows\temp\~10-1-13 2;17;27 pm  
 Instrument (Calc): Varian Star #1  
 Run Mode: Analysis  
 Peak Measurement: Peak Area  
 Calculation Type: Percent  
 Calibration Level: N/A  
 Verification Tolerance: N/A

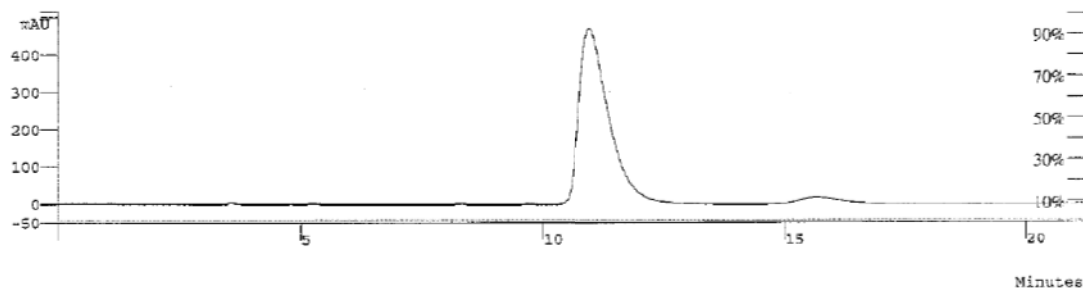

| Peak No       | Peak Name | Result (%)      | Ret. Time (min) | Time Offset (min) | Area (counts)    | Rel Ret Time | Sep. Code | Width 1/2 (sec) | Status Codes | Group |
|---------------|-----------|-----------------|-----------------|-------------------|------------------|--------------|-----------|-----------------|--------------|-------|
| 1             |           | 95.1714         | 10.973          | 0.000             | 105111600        | 0.00         | BB        | 38.8            |              | 0     |
| 2             |           | 4.8286          | 15.667          | 0.000             | 5332953          | 0.00         | BB        | 53.7            |              | 0     |
| <b>Totals</b> |           | <b>100.0000</b> |                 | <b>0.000</b>      | <b>110444552</b> |              |           |                 |              |       |

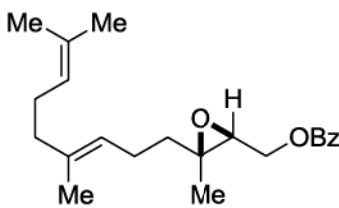

2I



Data File: c:\star\10-3-13 3:00:56 pm -1.run  
 Channel: 2 = 225.00 nm RESULTS  
 Sample ID: cw460rac  
 Operator (Inj): IA, Hex:IPA=95:5, 1.0 mL/min  
 Injection Date:  
 Injection Method: c:\star\chuan\standard 5%.mth  
 Run Time (min): 20.240  
 Workstation:  
 Instrument (Inj): Varian Star #1

Operator (Calc):  
 Calc Date: 10/03/13 03:27:36 PM  
 Times Calculated: 1  
 Calculation Method: c:\windows\temp\~10-3-13 3:00:56 pm  
 Instrument (Calc): Varian Star #1  
 Run Mode: Analysis  
 Peak Measurement: Peak Area  
 Calculation Type: Percent  
 Calibration Level: N/A  
 Verification Tolerance: N/A

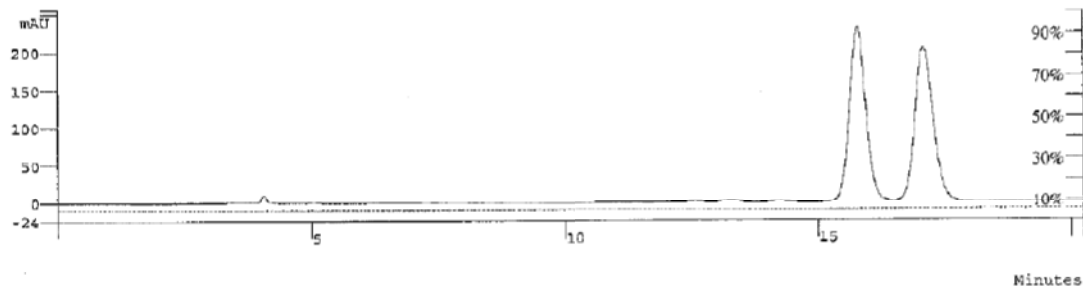

| Peak No       | Peak Name | Result ()       | Ret. Time (min) | Time Offset (min) | Area (counts)   | Rel Ret Time | Sep. Code | Width 1/2 (sec) | Status Codes | Group |
|---------------|-----------|-----------------|-----------------|-------------------|-----------------|--------------|-----------|-----------------|--------------|-------|
| 1             |           | 50.3685         | 15.773          | 0.000             | 26602120        | 0.00         | BB        | 20.7            |              | 0     |
| 2             |           | 49.6315         | 17.080          | 0.000             | 26212922        | 0.00         | BB        | 23.1            |              | 0     |
| <b>Totals</b> |           | <b>100.0000</b> |                 | <b>0.000</b>      | <b>52815040</b> |              |           |                 |              |       |

Data File: c:\star\10-3-13 3:26:26 pm -1.run  
 Channel: 2 = 225.00 nm RESULTS  
 Sample ID: cw460a  
 Operator (Inj): IA, hex:IPA=95:5, 1.0 mL/min  
 Injection Date:  
 Injection Method: c:\star\chuan\standard 5%.mth  
 Run Time (min): 21.147  
 Workstation:  
 Instrument (Inj): Varian Star #1

Operator (Calc):  
 Calc Date: 10/03/13 03:48:37 PM  
 Times Calculated: 1  
 Calculation Method: c:\windows\temp\~10-3-13 3:26:26 pm  
 Instrument (Calc): Varian Star #1  
 Run Mode: Analysis  
 Peak Measurement: Peak Area  
 Calculation Type: Percent  
 Calibration Level: N/A  
 Verification Tolerance: N/A

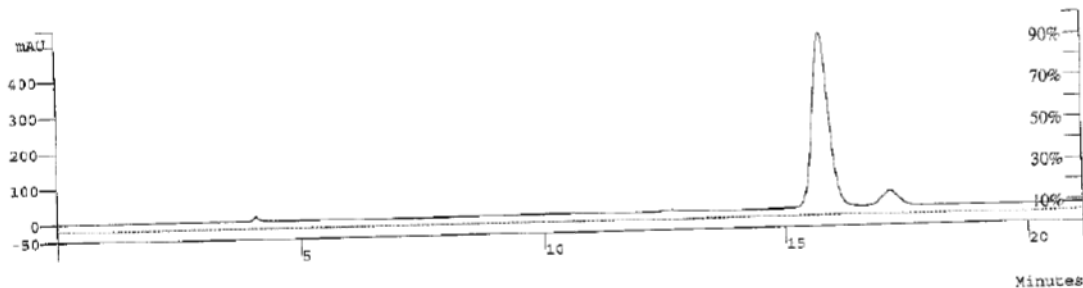

| Peak No       | Peak Name | Result ()       | Ret. Time (min) | Time Offset (min) | Area (counts)   | Rel Ret Time | Sep. Code | Width 1/2 (sec) | Status Codes | Group |
|---------------|-----------|-----------------|-----------------|-------------------|-----------------|--------------|-----------|-----------------|--------------|-------|
| 1             |           | 94.0124         | 15.747          | 0.000             | 58178720        | 0.00         | BB        | 21.5            |              | 0     |
| 2             |           | 5.9876          | 17.160          | 0.000             | 3705405         | 0.00         | BB        | 19.5            |              | 0     |
| <b>Totals</b> |           | <b>100.0000</b> |                 | <b>0.000</b>      | <b>61884124</b> |              |           |                 |              |       |

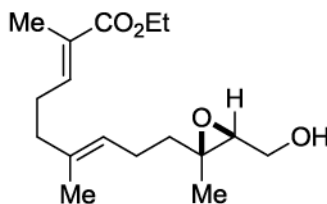

2m

Analysis Date & Time : 12/23/2013 3:53:38 PM  
User Name : Admin  
Vial# : 0  
Sample Name : 354rac  
Sample ID : 354rac  
Sample Type : Unknown  
Injection Volume :  
ISTD Amount :

Data Name : C:\Documents and Settings\Administrator\Desktop\Data\Project\Chuan\354rac7.gcd  
Method Name : C:\Documents and Settings\Administrator\Desktop\Method File\Chuan\120.gcm

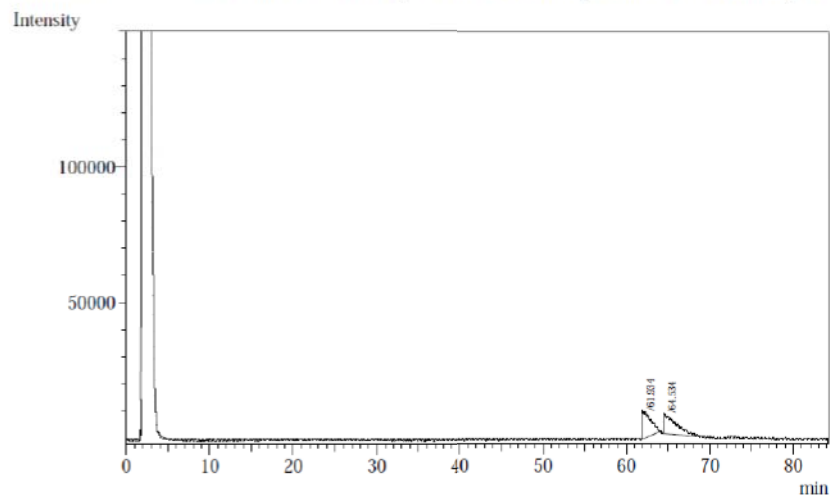

| Peak#        | Ret.Time | Area           | Area%          | Height       | Mark ID# | Cmpd Name |
|--------------|----------|----------------|----------------|--------------|----------|-----------|
| 1            | 61.934   | 732873         | 48.195         | 10121        |          |           |
| 2            | 64.534   | 787762         | 51.805         | 7366         |          |           |
| <b>Total</b> |          | <b>1520635</b> | <b>100.000</b> | <b>17487</b> |          |           |

Analysis Date & Time : 12/24/2013 2:48:00 PM  
User Name : Admin  
Vial# : 0  
Sample Name : 354a  
Sample ID : 354a  
Sample Type : Unknown  
Injection Volume :  
ISTD Amount :

Data Name : C:\Documents and Settings\Administrator\Desktop\Data\Project\Chuan\354a3.gcd  
Method Name : C:\Documents and Settings\Administrator\Desktop\Method File\Chuan\120.gcm

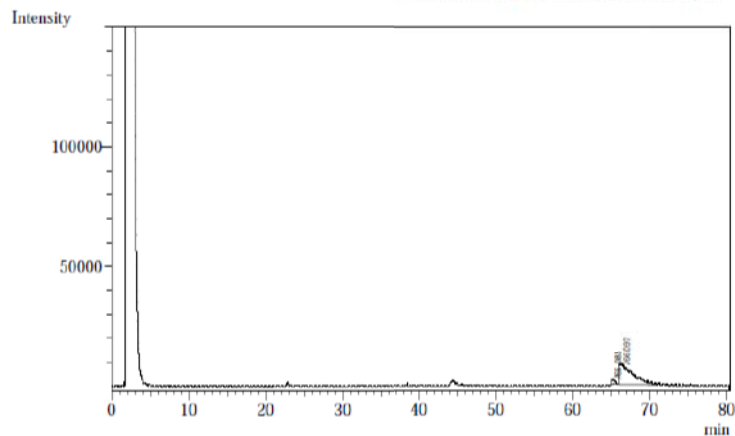

| Peak#        | Ret.Time | Area           | Area%          | Height       | Mark ID# | Cmpd Name |
|--------------|----------|----------------|----------------|--------------|----------|-----------|
| 1            | 65.083   | 62382          | 5.478          | 2010         |          |           |
| 2            | 66.097   | 1076356        | 94.522         | 8557         |          |           |
| <b>Total</b> |          | <b>1138738</b> | <b>100.000</b> | <b>10567</b> |          |           |

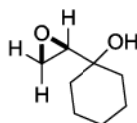

2n

Data File: c:\star\10-4-13 1;21:29 pm -1.run  
 Channel: 2 = 225.00 nm RESULTS  
 Sample ID: cw461rac  
 Operator (Inj): IA, hex:IPA=95:5, 1.0 mL/min  
 Injection Date:  
 Injection Method: c:\star\chuan\standard 5%.mth  
 Run Time (min): 23.600  
 Workstation:  
 Instrument (Inj): Varian Star #1

Operator (Calc):  
 Calc Date: 10/04/13 01:49:36 PM  
 Times Calculated: 1  
 Calculation Method: c:\windows\temp\~10-4-13 1;21:29 pm  
 Instrument (Calc): Varian Star #1  
 Run Mode: Analysis  
 Peak Measurement: Peak Area  
 Calculation Type: Percent  
 Calibration Level: N/A  
 Verification Tolerance: N/A

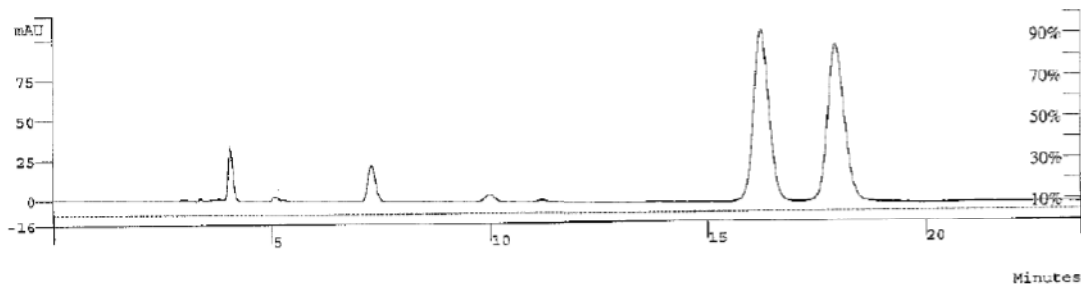

| Peak No       | Peak Name | Result (%)      | Ret. Time (min) | Time Offset (min) | Area (counts)   | Rel Ret Time | Sep. Code | Width 1/2 (sec) | Status Codes | Group |
|---------------|-----------|-----------------|-----------------|-------------------|-----------------|--------------|-----------|-----------------|--------------|-------|
| 1             |           | 50.1418         | 16.253          | 0.000             | 13383110        | 0.00         | BB        | 22.5            |              | 0     |
| 2             |           | 49.8582         | 17.960          | 0.000             | 13307417        | 0.00         | BB        | 24.3            |              | 0     |
| <b>Totals</b> |           | <b>100.0000</b> |                 | <b>0.000</b>      | <b>26690528</b> |              |           |                 |              |       |

Data File: c:\star\10-5-13 11;15:52 am -1.run  
 Channel: 2 = 225.00 nm RESULTS  
 Sample ID: cw461a  
 Operator (Inj): IA, hex:IPA=95:5, 1.0 mL/min  
 Injection Date:  
 Injection Method: c:\star\chuan\standard 5%.mth  
 Run Time (min): 25.360  
 Workstation:  
 Instrument (Inj): Varian Star #1

Operator (Calc):  
 Calc Date: 10/05/13 11:42:13 AM  
 Times Calculated: 1  
 Calculation Method: c:\windows\temp\~10-5-13 11;15:52  
 Instrument (Calc): Varian Star #1  
 Run Mode: Analysis  
 Peak Measurement: Peak Area  
 Calculation Type: Percent  
 Calibration Level: N/A  
 Verification Tolerance: N/A

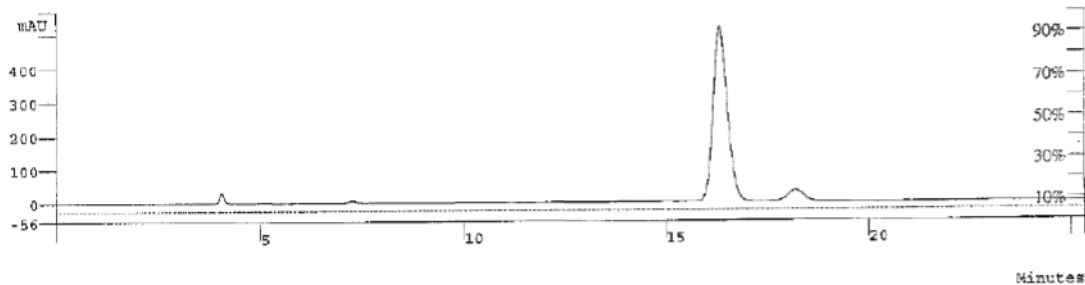

| Peak No       | Peak Name | Result (%)      | Ret. Time (min) | Time Offset (min) | Area (counts)   | Rel Ret Time | Sep. Code | Width 1/2 (sec) | Status Codes | Group |
|---------------|-----------|-----------------|-----------------|-------------------|-----------------|--------------|-----------|-----------------|--------------|-------|
| 1             |           | 95.7613         | 16.333          | 0.000             | 64904304        | 0.00         | BB        | 22.4            |              | 0     |
| 2             |           | 4.2387          | 18.200          | 0.000             | 2872845         | 0.00         | BB        | 19.1            |              | 0     |
| <b>Totals</b> |           | <b>100.0000</b> |                 | <b>0.000</b>      | <b>67777152</b> |              |           |                 |              |       |

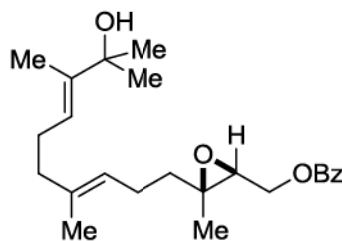

2u

Data File: c:\star\10-21-13 3:58:38 pm -1.run  
 Channel: 2 = 225.00 nm RESULTS  
 Sample ID: cw483rac  
 Operator (Inj): IB, hex:IPA=97:3, 1.0 mL/min  
 Injection Date:  
 Injection Method: c:\star\chuan\standard 3%.mth  
 Run Time (min): 21.600  
 Workstation:  
 Instrument (Inj): Varian Star #1

Operator (Calc):  
 Calc Date: 10/21/13 04:21:14 PM  
 Times Calculated: 1  
 Calculation Method: c:\windows\temp\~10-21-13 3:58:38  
 Instrument (Calc): Varian Star #1  
 Run Mode: Analysis  
 Peak Measurement: Peak Area  
 Calculation Type: Percent  
 Calibration Level: N/A  
 Verification Tolerance: N/A

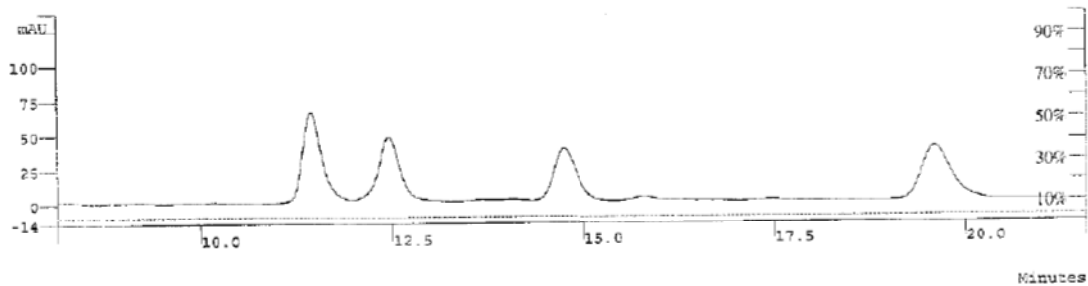

| Peak No       | Peak Name | Result ()       | Ret. Time (min) | Time Offset (min) | Area (counts)   | Rel Ret Time | Sep. Code | Width 1/2 (sec) | Status Codes | Group |
|---------------|-----------|-----------------|-----------------|-------------------|-----------------|--------------|-----------|-----------------|--------------|-------|
| 1             |           | 29.2508         | 11.427          | 0.000             | 5619429         | 0.00         | BB        | 15.6            |              | 0     |
| 2             |           | 21.9416         | 12.440          | 0.000             | 4215258         | 0.00         | BB        | 16.1            |              | 0     |
| 3             |           | 20.7022         | 14.733          | 0.000             | 3977154         | 0.00         | BB        | 18.9            |              | 0     |
| 4             |           | 28.1054         | 19.587          | 0.000             | 5399383         | 0.00         | BB        | 24.6            |              | 0     |
| <b>Totals</b> |           | <b>100.0000</b> |                 | <b>0.000</b>      | <b>19211224</b> |              |           |                 |              |       |

Data File: c:\star\10-23-13 1:26:05 pm -1.run  
 Channel: 2 = 225.00 nm RESULTS  
 Sample ID: cw483b  
 Operator (Inj): IB, hex:IPA=97:3, 1.0 mL/min  
 Injection Date:  
 Injection Method: c:\star\chuan\standard 3%.mth  
 Run Time (min): 28.213  
 Workstation:  
 Instrument (Inj): Varian Star #1

Operator (Calc):  
 Calc Date: 10/23/13 02:36:42 PM  
 Times Calculated: 3  
 Calculation Method: c:\windows\temp\~10-23-13 1:26:05  
 Instrument (Calc): Varian Star #1  
 Run Mode: Analysis  
 Peak Measurement: Peak Area  
 Calculation Type: Percent  
 Calibration Level: N/A  
 Verification Tolerance: N/A

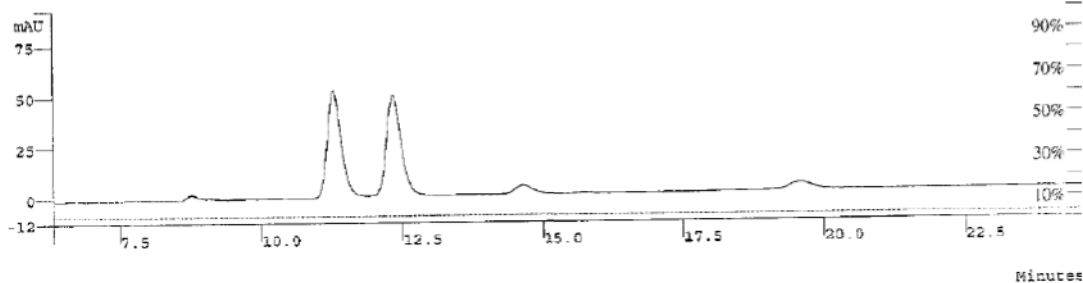

| Peak No       | Peak Name | Result ()       | Ret. Time (min) | Time Offset (min) | Area (counts)  | Rel Ret Time | Sep. Code | Width 1/2 (sec) | Status Codes | Group |
|---------------|-----------|-----------------|-----------------|-------------------|----------------|--------------|-----------|-----------------|--------------|-------|
| 1             |           | 47.5336         | 11.293          | 0.000             | 4474522        | 0.00         | BB        | 15.7            |              | 0     |
| 2             |           | 46.8312         | 12.333          | 0.000             | 4408405        | 0.00         | BB        | 16.1            |              | 0     |
| 3             |           | 2.5204          | 14.653          | 0.000             | 237254         | 0.00         | BB        | 13.9            |              | 0     |
| 4             |           | 3.1148          | 19.587          | 0.000             | 293209         | 0.00         | BB        | 19.9            |              | 0     |
| <b>Totals</b> |           | <b>100.0000</b> |                 | <b>0.000</b>      | <b>9413390</b> |              |           |                 |              |       |

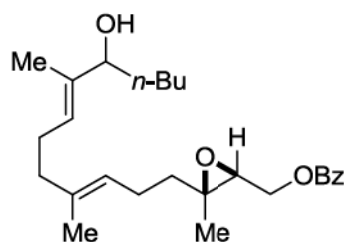

2v

Data File: c:\star\12-20-13 12:49:29 pm -1.run  
 Channel: 2 = 225.00 nm RESULTS  
 Sample ID: cw353rac  
 Operator (Inj): OJ-H, hex:IPA=99:1, 1.0 mL/min  
 Injection Date:  
 Injection Method: c:\star\chuan\standard 1%.mth  
 Run Time (min): 21.280  
 Workstation:  
 Instrument (Inj): Varian Star #1

Operator (Calc):  
 Calc Date: 12/20/13 01:37:02 PM  
 Times Calculated: 1  
 Calculation Method: c:\windows\temp\~12-20-13 12:49:29  
 Instrument (Calc): Varian Star #1  
 Run Mode: Analysis  
 Peak Measurement: Peak Area  
 Calculation Type: Percent  
 Calibration Level: N/A  
 Verification Tolerance: N/A

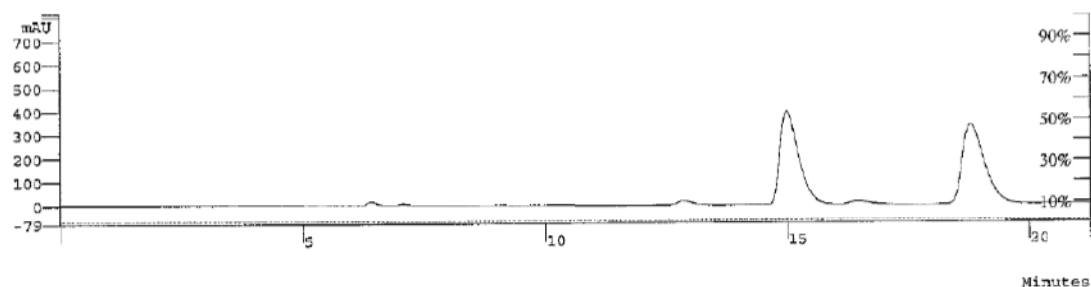

| Peak No       | Peak Name | Result (%)      | Ret. Time (min) | Time Offset (min) | Area (counts)    | Rel Ret Time | Sep. Code | Width 1/2 (sec) | Status Codes | Group |
|---------------|-----------|-----------------|-----------------|-------------------|------------------|--------------|-----------|-----------------|--------------|-------|
| 1             |           | 49.7316         | 14.973          | 0.000             | 54689036         | 0.00         | BB        | 24.9            |              | 0     |
| 2             |           | 50.2684         | 18.787          | 0.000             | 55279256         | 0.00         | BB        | 29.3            |              | 0     |
| <b>Totals</b> |           | <b>100.0000</b> |                 | <b>0.000</b>      | <b>109968288</b> |              |           |                 |              |       |

Data File: c:\star\12-20-13 3:12:27 pm -1.run  
 Channel: 2 = 225.00 nm RESULTS  
 Sample ID: CW353a  
 Operator (Inj): OJ-H, hex:IPA=99:1, 1.0 mL/min  
 Injection Date:  
 Injection Method: c:\star\chuan\standard 1%.mth  
 Run Time (min): 21.627  
 Workstation:  
 Instrument (Inj): Varian Star #1

Operator (Calc):  
 Calc Date: 12/20/13 03:35:02 PM  
 Times Calculated: 1  
 Calculation Method: c:\windows\temp\~12-20-13 3:12:27  
 Instrument (Calc): Varian Star #1  
 Run Mode: Analysis  
 Peak Measurement: Peak Area  
 Calculation Type: Percent  
 Calibration Level: N/A  
 Verification Tolerance: N/A

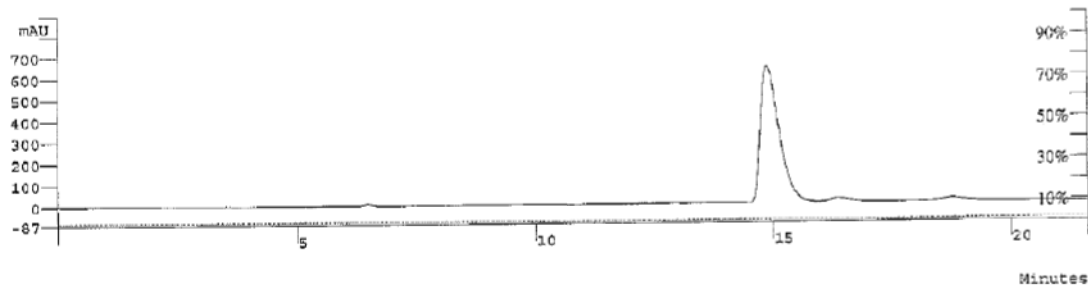

| Peak No       | Peak Name | Result (%)      | Ret. Time (min) | Time Offset (min) | Area (counts)   | Rel Ret Time | Sep. Code | Width 1/2 (sec) | Status Codes | Group |
|---------------|-----------|-----------------|-----------------|-------------------|-----------------|--------------|-----------|-----------------|--------------|-------|
| 1             |           | 97.4617         | 14.867          | 0.000             | 87846240        | 0.00         | BB        | 25.0            |              | 0     |
| 2             |           | 2.5383          | 18.760          | 0.000             | 2287903         | 0.00         | BB        | 27.3            |              | 0     |
| <b>Totals</b> |           | <b>100.0000</b> |                 | <b>0.000</b>      | <b>90134144</b> |              |           |                 |              |       |

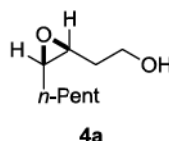

Data File: c:\star\6-23-13 7:38:49 pm -1.run  
 Channel: 2 = 225.00 nm RESULTS  
 Sample ID: cw365rac  
 Operator (Inj): OB-H, hex:IPA= 98:2, 1.0 mL/min  
 Injection Date:  
 Injection Method: c:\star\chuan\standard 2%.mth  
 Run Time (min): 39.333  
 Workstation:  
 Instrument (Inj): Varian Star #1

Operator (Calc):  
 Calc Date: 06/23/13 08:18:54 PM  
 Times Calculated: 1  
 Calculation Method: c:\windows\temp\~6-23-13 7:38:49 pm  
 Instrument (Calc): Varian Star #1  
 Run Mode: Analysis  
 Peak Measurement: Peak Area  
 Calculation Type: Percent  
 Calibration Level: N/A  
 Verification Tolerance: N/A

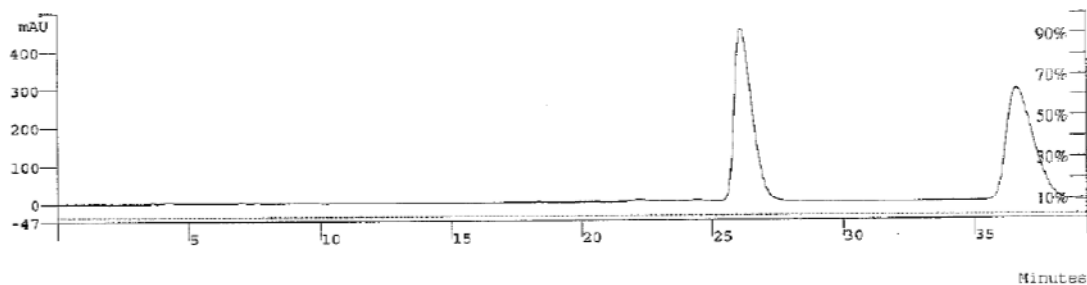

| Peak No       | Peak Name | Result (%)      | Ret. Time (min) | Time Offset (min) | Area (counts)    | Rel Ret Time | Sep. Code | Width 1/2 (sec) | Status Codes | Group |
|---------------|-----------|-----------------|-----------------|-------------------|------------------|--------------|-----------|-----------------|--------------|-------|
| 1             |           | 49.9623         | 26.067          | 0.000             | 111041960        | 0.00         | BB        | 43.8            |              | 0     |
| 2             |           | 50.0377         | 36.600          | 0.000             | 111209624        | 0.00         | BB        | 67.9            |              | 0     |
| <b>Totals</b> |           | <b>100.0000</b> |                 | <b>0.000</b>      | <b>222251584</b> |              |           |                 |              |       |

Data File: c:\star\6-24-13 8:56:35 am -1.run  
 Channel: 2 = 225.00 nm RESULTS  
 Sample ID: cw365a  
 Operator (Inj): OB-H, hex:IPA=98:2, 1.0 mL/min  
 Injection Date:  
 Injection Method: c:\star\chuan\standard 2%.mth  
 Run Time (min): 50.373  
 Workstation:  
 Instrument (Inj): Varian Star #1

Operator (Calc):  
 Calc Date: 06/24/13 09:48:08 AM  
 Times Calculated: 1  
 Calculation Method: c:\windows\temp\~6-24-13 8:56:35 am  
 Instrument (Calc): Varian Star #1  
 Run Mode: Analysis  
 Peak Measurement: Peak Area  
 Calculation Type: Percent  
 Calibration Level: N/A  
 Verification Tolerance: N/A

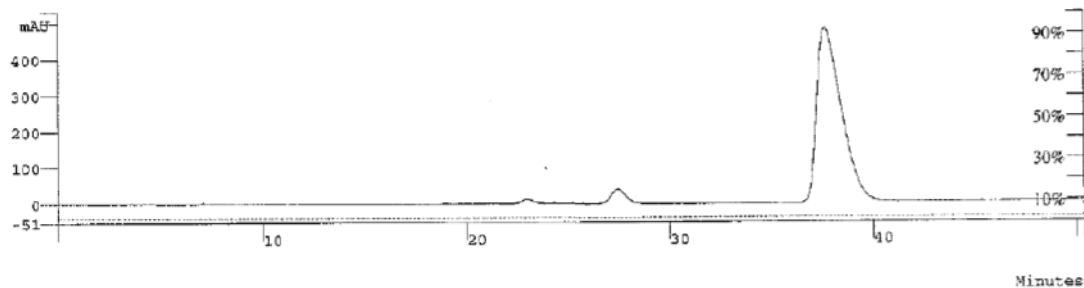

| Peak No       | Peak Name | Result (%)      | Ret. Time (min) | Time Offset (min) | Area (counts)    | Rel Ret Time | Sep. Code | Width 1/2 (sec) | Status Codes | Group |
|---------------|-----------|-----------------|-----------------|-------------------|------------------|--------------|-----------|-----------------|--------------|-------|
| 1             |           | 3.8998          | 27.453          | 0.000             | 8395430          | 0.00         | BB        | 42.4            |              | 0     |
| 2             |           | 96.1002         | 37.613          | 0.000             | 206884720        | 0.00         | BB        | 78.4            |              | 0     |
| <b>Totals</b> |           | <b>100.0000</b> |                 | <b>0.000</b>      | <b>215280144</b> |              |           |                 |              |       |

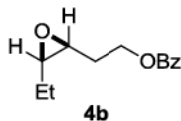

Data File: c:\star\12-14-13 11:51:30 am -1.run  
 Channel: 2 = 225.00 nm RESULTS  
 Sample ID: cw369rac  
 Operator (Inj): OJ-H, hex:IPA=99:1, 1.0 mL/min  
 Injection Date:  
 Injection Method: c:\star\chuan\standard 1%.mth  
 Run Time (min): 27.653  
 Workstation:  
 Instrument (Inj): Varian Star #1

Operator (Calc):  
 Calc Date: 12/14/13 12:20:58 PM  
 Times Calculated: 1  
 Calculation Method: c:\windows\temp\~12-14-13 11:51:30  
 Instrument (Calc): Varian Star #1  
 Run Mode: Analysis  
 Peak Measurement: Peak Area  
 Calculation Type: Percent  
 Calibration Level: N/A  
 Verification Tolerance: N/A

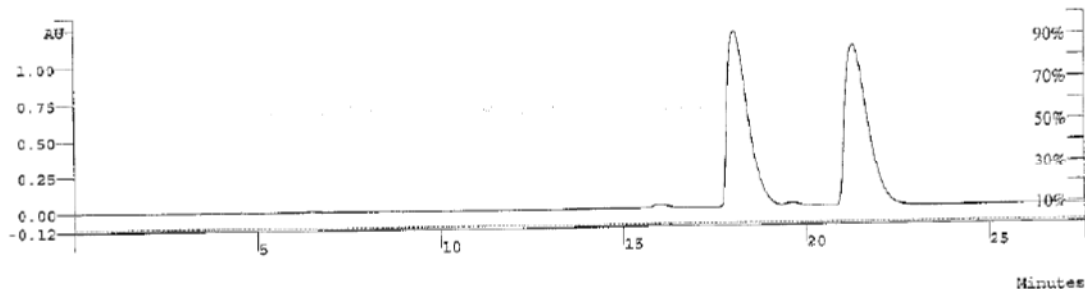

| Peak No       | Peak Name | Result (%)      | Ret. Time (min) | Time Offset (min) | Area (counts)    | Rel Ret Time | Sep. Code | Width 1/2 (sec) | Status Codes | Group |
|---------------|-----------|-----------------|-----------------|-------------------|------------------|--------------|-----------|-----------------|--------------|-------|
| 1             |           | 49.3556         | 18.067          | 0.000             | 236198176        | 0.00         | BB        | 36.3            |              | 0     |
| 2             |           | 50.6444         | 21.293          | 0.000             | 242366048        | 0.00         | BB        | 40.3            |              | 0     |
| <b>Totals</b> |           | <b>100.0000</b> |                 | <b>0.000</b>      | <b>478564224</b> |              |           |                 |              |       |

Data File: c:\star\12-18-13 3:11:48 pm -1.run  
 Channel: 2 = 225.00 nm RESULTS  
 Sample ID: cw369a  
 Operator (Inj): OJ-H, hex:IPA=98:2, 1.0 mL/min  
 Injection Date:  
 Injection Method: c:\star\chuan\standard 1%.mth  
 Run Time (min): 27.653  
 Workstation:  
 Instrument (Inj): Varian Star #1

Operator (Calc):  
 Calc Date: 12/18/13 03:40:20 PM  
 Times Calculated: 1  
 Calculation Method: c:\windows\temp\~12-18-13 3:11:48  
 Instrument (Calc): Varian Star #1  
 Run Mode: Analysis  
 Peak Measurement: Peak Area  
 Calculation Type: Percent  
 Calibration Level: N/A  
 Verification Tolerance: N/A

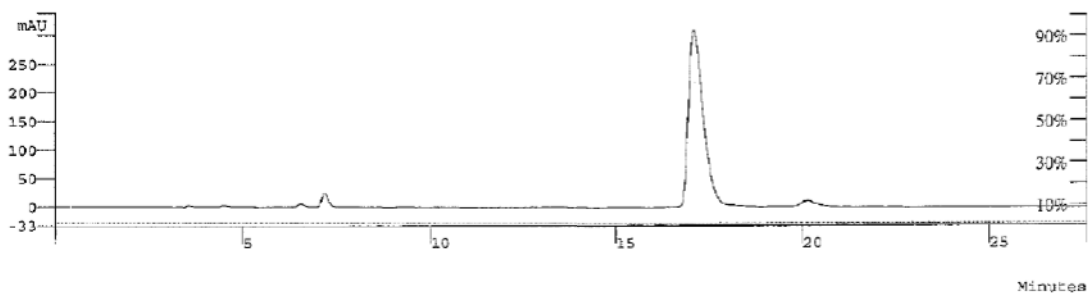

| Peak No       | Peak Name | Result (%)      | Ret. Time (min) | Time Offset (min) | Area (counts)   | Rel Ret Time | Sep. Code | Width 1/2 (sec) | Status Codes | Group |
|---------------|-----------|-----------------|-----------------|-------------------|-----------------|--------------|-----------|-----------------|--------------|-------|
| 1             |           | 96.6920         | 17.107          | 0.000             | 44061856        | 0.00         | BB        | 25.2            |              | 0     |
| 2             |           | 3.3080          | 20.147          | 0.000             | 1507419         | 0.00         | BB        | 26.6            |              | 0     |
| <b>Totals</b> |           | <b>100.0000</b> |                 | <b>0.000</b>      | <b>45569276</b> |              |           |                 |              |       |

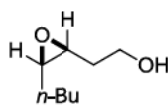

4c

Data File: c:\star\6-23-13 3;14;00 pm -1.run  
 Channel: 2 = 225.00 nm RESULTS  
 Sample ID: cw362rac  
 Operator (Inj): OJ-H, hex:IPA= 99:1, 1.0 mL/min  
 Injection Date:  
 Injection Method: c:\star\chuan\standard 1%.mth  
 Run Time (min): 23.013  
 Workstation:  
 Instrument (Inj): Varian Star #1

Operator (Calc):  
 Calc Date: 06/23/13 03:52:52 PM  
 Times Calculated: 1  
 Calculation Method: c:\windows\temp\6-23-13 3;14;00 pm  
 Instrument (Calc): Varian Star #1  
 Run Mode: Analysis  
 Peak Measurement: Peak Area  
 Calculation Type: Percent  
 Calibration Level: N/A  
 Verification Tolerance: N/A

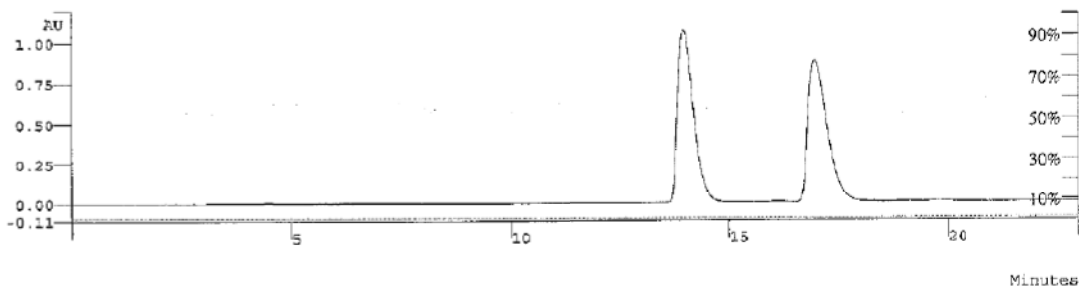

| Peak No       | Peak Name | Result ()       | Ret. Time (min) | Time Offset (min) | Area (counts)    | Rel Ret Time | Sep. Code | Width 1/2 (sec) | Status Codes | Group |
|---------------|-----------|-----------------|-----------------|-------------------|------------------|--------------|-----------|-----------------|--------------|-------|
| 1             |           | 50.1561         | 13.960          | 0.000             | 140633904        | 0.00         | BB        | 23.7            |              | 0     |
| 2             |           | 49.8439         | 16.947          | 0.000             | 139758384        | 0.00         | BB        | 28.6            |              | 0     |
| <b>Totals</b> |           | <b>100.0000</b> |                 | <b>0.000</b>      | <b>280392288</b> |              |           |                 |              |       |

Data File: c:\star\6-23-13 6;19;11 pm -1.run  
 Channel: 2 = 225.00 nm RESULTS  
 Sample ID: cw362A  
 Operator (Inj): OJ-H, hex:IPA= 99:1, 1.0 mL/min  
 Injection Date:  
 Injection Method: c:\star\chuan\standard 1%.mth  
 Run Time (min): 20.480  
 Workstation:  
 Instrument (Inj): Varian Star #1

Operator (Calc):  
 Calc Date: 06/23/13 06:40:55 PM  
 Times Calculated: 1  
 Calculation Method: c:\windows\temp\6-23-13 6;19;11 pm  
 Instrument (Calc): Varian Star #1  
 Run Mode: Analysis  
 Peak Measurement: Peak Area  
 Calculation Type: Percent  
 Calibration Level: N/A  
 Verification Tolerance: N/A

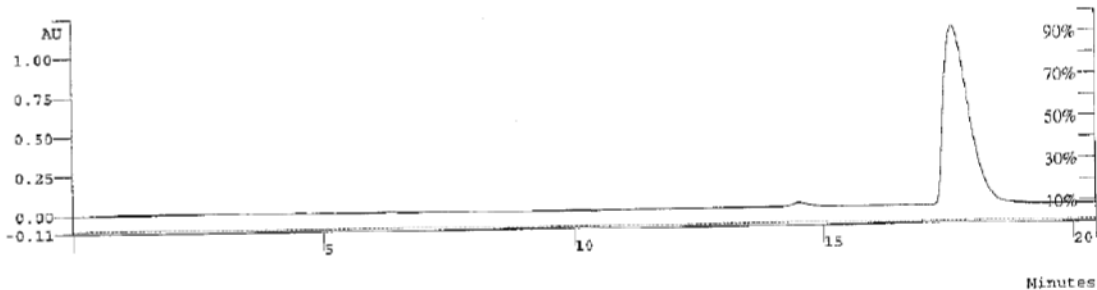

| Peak No       | Peak Name | Result ()       | Ret. Time (min) | Time Offset (min) | Area (counts)    | Rel Ret Time | Sep. Code | Width 1/2 (sec) | Status Codes | Group |
|---------------|-----------|-----------------|-----------------|-------------------|------------------|--------------|-----------|-----------------|--------------|-------|
| 1             |           | 1.4913          | 14.520          | 0.000             | 3018698          | 0.00         | BB        | 20.8            |              | 0     |
| 2             |           | 98.5087         | 17.587          | 0.000             | 199399408        | 0.00         | BB        | 32.2            |              | 0     |
| <b>Totals</b> |           | <b>100.0000</b> |                 | <b>0.000</b>      | <b>202418112</b> |              |           |                 |              |       |

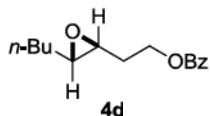



Data File: c:\star\7-3-13 5:40:57 pm -1.run  
 Channel: 2 = 225.00 nm RESULTS  
 Sample ID: cw373r4uc  
 Operator (Inj): OB-H, hex:IPA=98:2, 1.0 mL/min  
 Injection Date:  
 Injection Method: c:\star\chuan\standard 2%.rnh  
 Run Time (min): 43.200  
 Workstation:  
 Instrument (Inj): Varian Star #1

Operator (Calc):  
 Calc Date: 07/03/13 06:24:52 PM  
 Times Calculated: 1  
 Calculation Method: c:\windows\temp\~7-3-13 5:40:57 pm  
 Instrument (Calc): Varian Star #1  
 Run Mode: Analysis  
 Peak Measurement: Peak Area  
 Calculation Type: Percent  
 Calibration Level: N/A  
 Verification Tolerance: N/A

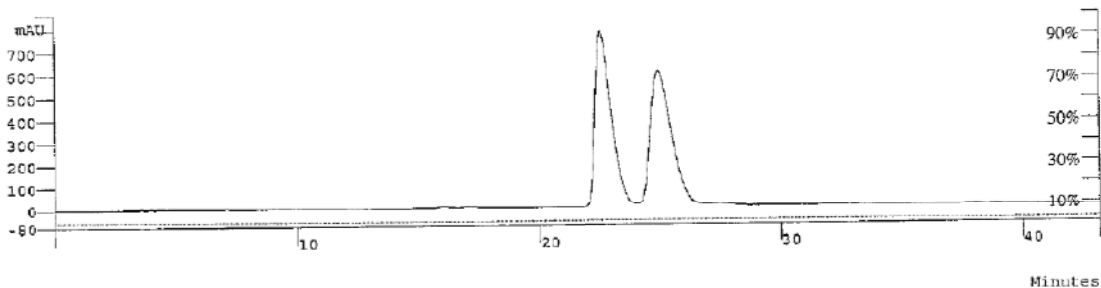

| Peak No       | Peak Name | Result ()       | Ret. Time (min) | Time Offset (min) | Area (counts)    | Rel Ret Time | Sep. Code | Width 1/2 (sec) | Status Codes | Group |
|---------------|-----------|-----------------|-----------------|-------------------|------------------|--------------|-----------|-----------------|--------------|-------|
| 1             |           | 50.0448         | 22.547          | 0.000             | 185075296        | 0.00         | BB        | 43.7            |              | 0     |
| 2             |           | 49.9552         | 24.920          | 0.000             | 184743600        | 0.00         | BB        | 56.4            |              | 0     |
| <b>Totals</b> |           | <b>100.0000</b> |                 | <b>0.000</b>      | <b>369818880</b> |              |           |                 |              |       |

Data File: c:\star\7-3-13 6:28:47 pm -1.run  
 Channel: 2 = 225.00 nm RESULTS  
 Sample ID: cw373a  
 Operator (Inj): OB-H, hex:IPA= 98:2, 1.0 mL/min  
 Injection Date:  
 Injection Method: c:\star\chuan\standard 2%.mth  
 Run Time (min): 30.107  
 Workstation:  
 Instrument (Inj): Varian Star #1

Operator (Calc):  
 Calc Date: 07/03/13 07:02:00 PM  
 Times Calculated: 2  
 Calculation Method: c:\windows\temp\~7-3-13 6:28:47 pm  
 Instrument (Calc): Varian Star #1  
 Run Mode: Analysis  
 Peak Measurement: Peak Area  
 Calculation Type: Percent  
 Calibration Level: N/A  
 Verification Tolerance: N/A

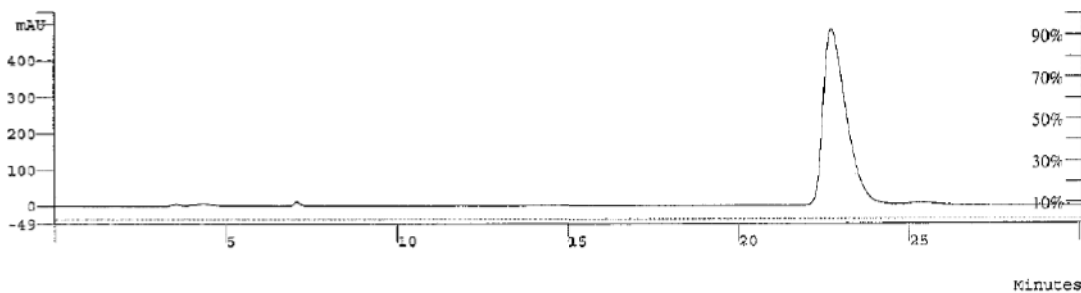

| Peak No       | Peak Name | Result ()       | Ret. Time (min) | Time Offset (min) | Area (counts)    | Rel Ret Time | Sep. Code | Width 1/2 (sec) | Status Codes | Group |
|---------------|-----------|-----------------|-----------------|-------------------|------------------|--------------|-----------|-----------------|--------------|-------|
| 1             |           | 99.2010         | 22.733          | 0.000             | 114692360        | 0.00         | BB        | 43.0            |              | 0     |
| 2             |           | 0.7990          | 25.373          | 0.000             | 923753           | 0.00         | BB        | 37.4            |              | 0     |
| <b>Totals</b> |           | <b>100.0000</b> |                 | <b>0.000</b>      | <b>115616112</b> |              |           |                 |              |       |

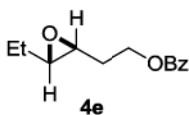

Data File: c:\star\7-12-13 10:44:34 am -1.run  
 Channel: 2 = 225.00 nm RESULTS  
 Sample ID: cw386rac  
 Operator (Inj): OB-H, hex:IPA= 95:5, 1.0 mL/min  
 Injection Date:  
 Injection Method: c:\star\chuan\standard 5%.mth  
 Run Time (min): 30.267  
 Workstation:  
 Instrument (Inj): Varian Star #1

Operator (Calc):  
 Calc Date: 07/12/13 11:22:26 AM  
 Times Calculated: 1  
 Calculation Method: c:\windows\temp\~7-12-13 10:44:34  
 Instrument (Calc): Varian Star #1  
 Run Mode: Analysis  
 Peak Measurement: Peak Area  
 Calculation Type: Percent  
 Calibration Level: N/A  
 Verification Tolerance: N/A

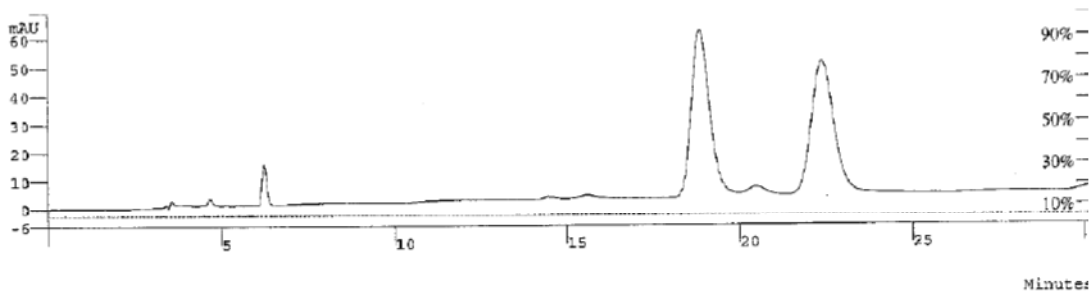

| Peak No       | Peak Name | Result (%)      | Ret. Time (min) | Time Offset (min) | Area (counts)   | Rel Ret Time | Sep. Code | Width 1/2 (sec) | Status Codes | Group |
|---------------|-----------|-----------------|-----------------|-------------------|-----------------|--------------|-----------|-----------------|--------------|-------|
| 1             |           | 50.2843         | 18.840          | 0.000             | 10856680        | 0.00         | BB        | 33.8            |              | 0     |
| 2             |           | 49.7157         | 22.387          | 0.000             | 10733912        | 0.00         | BB        | 42.1            |              | 0     |
| <b>Totals</b> |           | <b>100.0000</b> |                 | <b>0.000</b>      | <b>21590592</b> |              |           |                 |              |       |

Data File: c:\star\7-13-13 12:21:04 pm -1.run  
 Channel: 2 = 225.00 nm RESULTS  
 Sample ID: cw386b  
 Operator (Inj): OB-H, hex:IPA=95:5, 1.0 mL/min  
 Injection Date:  
 Injection Method: c:\star\chuan\standard 5%.mth  
 Run Time (min): 29.440  
 Workstation:  
 Instrument (Inj): Varian Star #1

Operator (Calc):  
 Calc Date: 07/13/13 12:51:30 PM  
 Times Calculated: 1  
 Calculation Method: c:\windows\temp\~7-13-13 12:21:04  
 Instrument (Calc): Varian Star #1  
 Run Mode: Analysis  
 Peak Measurement: Peak Area  
 Calculation Type: Percent  
 Calibration Level: N/A  
 Verification Tolerance: N/A

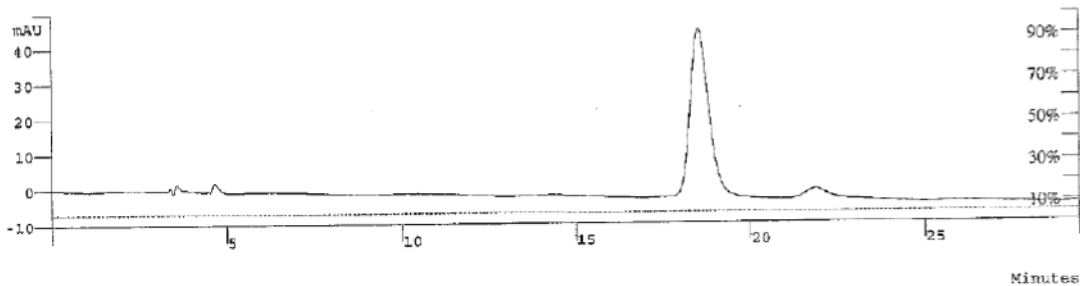

| Peak No       | Peak Name | Result (%)      | Ret. Time (min) | Time Offset (min) | Area (counts)  | Rel Ret Time | Sep. Code | Width 1/2 (sec) | Status Codes | Group |
|---------------|-----------|-----------------|-----------------|-------------------|----------------|--------------|-----------|-----------------|--------------|-------|
| 1             |           | 93.8404         | 18.520          | 0.000             | 9070010        | 0.00         | BB        | 33.7            |              | 0     |
| 2             |           | 6.1596          | 21.853          | 0.000             | 595347         | 0.00         | BB        | 38.9            |              | 0     |
| <b>Totals</b> |           | <b>100.0000</b> |                 | <b>0.000</b>      | <b>9665357</b> |              |           |                 |              |       |

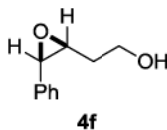

Data File: c:\star\10-11-13 4:58:35 pm -1.run  
 Channel: 2 = 225.00 nm RESULTS  
 Sample ID: cw467rac  
 Operator (Inj): OD-H, hex:IPA=99:1, 1.0 mL/min  
 Injection Date:  
 Injection Method: c:\star\chuan\standard 1%.mth  
 Run Time (min): 14.240  
 Workstation:  
 Instrument (Inj): Varian Star #1

Operator (Calc):  
 Calc Date: 10/11/13 05:13:48 PM  
 Times Calculated: 1  
 Calculation Method: c:\windows\temp\~10-11-13 4:58:35  
 Instrument (Calc): Varian Star #1  
 Run Mode: Analysis  
 Peak Measurement: Peak Area  
 Calculation Type: Percent  
 Calibration Level: N/A  
 Verification Tolerance: N/A

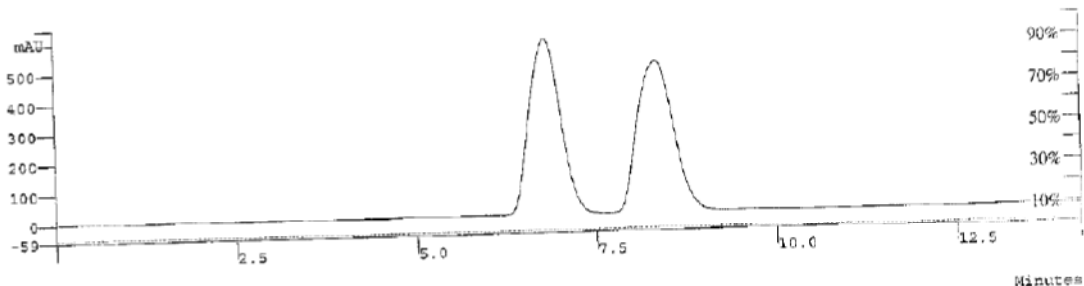

| Peak No | Peak Name | Result () | Ret. Time (min) | Time Offset (min) | Area (counts) | Rel Ret Time | Sep. Code | Width 1/2 (sec) | Status Codes | Group |
|---------|-----------|-----------|-----------------|-------------------|---------------|--------------|-----------|-----------------|--------------|-------|
| 1       |           | 50.1030   | 6.787           | 0.000             | 89597232      | 0.00         | BB        | 29.0            |              | 0     |
| 2       |           | 49.8970   | 8.333           | 0.000             | 89228800      | 0.00         | BB        | 33.7            |              | 0     |
| Totals  |           | 100.0000  |                 | 0.000             | 178826032     |              |           |                 |              |       |

Data File: c:\star\10-11-13 5:31:01 pm -1.run  
 Channel: 2 = 225.00 nm RESULTS  
 Sample ID: cw467a  
 Operator (Inj): OD-H, hex:IPA= 99:1, 1.0 mL/min  
 Injection Date:  
 Injection Method: c:\star\chuan\standard 1%.mth  
 Run Time (min): 16.160  
 Workstation:  
 Instrument (Inj): Varian Star #1

Operator (Calc):  
 Calc Date: 10/11/13 05:49:44 PM  
 Times Calculated: 1  
 Calculation Method: c:\windows\temp\~10-11-13 5:31:01  
 Instrument (Calc): Varian Star #1  
 Run Mode: Analysis  
 Peak Measurement: Peak Area  
 Calculation Type: Percent  
 Calibration Level: N/A  
 Verification Tolerance: N/A

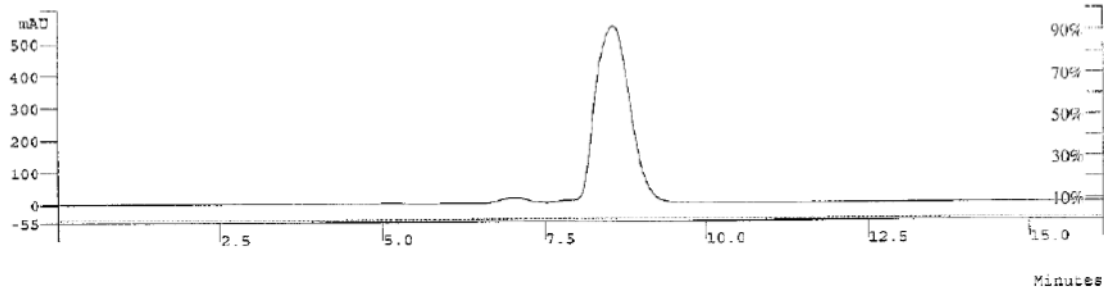

| Peak No | Peak Name | Result () | Ret. Time (min) | Time Offset (min) | Area (counts) | Rel Ret Time | Sep. Code | Width 1/2 (sec) | Status Codes | Group |
|---------|-----------|-----------|-----------------|-------------------|---------------|--------------|-----------|-----------------|--------------|-------|
| 1       |           | 2.2800    | 7.027           | 0.000             | 2347757       | 0.00         | BB        | 28.2            |              | 0     |
| 2       |           | 97.7200   | 8.573           | 0.000             | 100624568     | 0.00         | BB        | 35.4            |              | 0     |
| Totals  |           | 100.0000  |                 | 0.000             | 102972328     |              |           |                 |              |       |

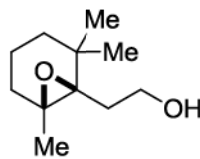

4g

Analysis Date & Time : 12/26/2013 11:06:47 AM  
User Name : Admin  
Vial# : 0  
Sample Name : 389rac  
Sample ID : 389rac  
Sample Type : Unknown  
Injection Volume :  
ISTD Amount :

Data Name : C:\Documents and Settings\Administrator\Desktop\Data\Project\1\Chuan\389rac2.gcd  
Method Name : C:\Documents and Settings\Administrator\Desktop\Method File\Chuan\120.gcm

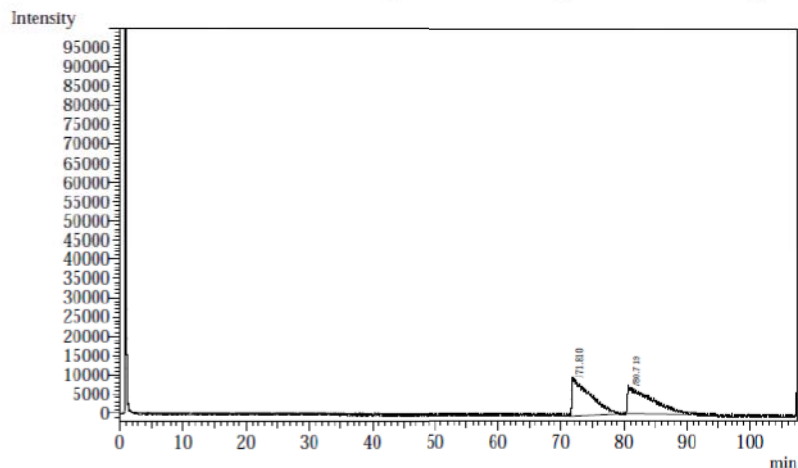

| Peak#        | Ret.Time | Area           | Area%          | Height       | Mark ID# | Cmpd Name |
|--------------|----------|----------------|----------------|--------------|----------|-----------|
| 1            | 71.810   | 2021849        | 51.459         | 9893         |          |           |
| 2            | 80.719   | 1907173        | 48.541         | 7157         |          |           |
| <b>Total</b> |          | <b>3929022</b> | <b>100.000</b> | <b>17050</b> |          |           |

Analysis Date & Time : 12/26/2013 1:00:44 PM  
User Name : Admin  
Vial# : 0  
Sample Name : 389a  
Sample ID : 389a  
Sample Type : Unknown  
Injection Volume :  
ISTD Amount :

Data Name : C:\Documents and Settings\Administrator\Desktop\Data\Project\1\Chuan\389a2.gcd  
Method Name : C:\Documents and Settings\Administrator\Desktop\Method File\Chuan\120.gcm

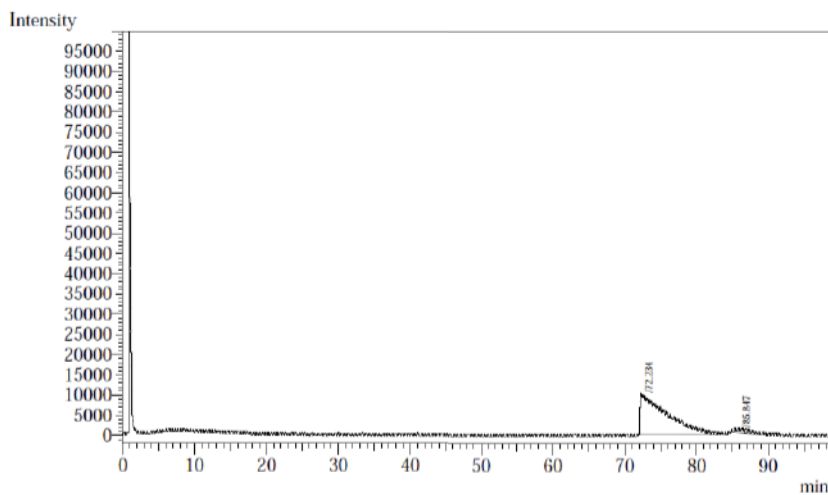

| Peak#        | Ret.Time | Area           | Area%          | Height       | Mark ID# | Cmpd Name |
|--------------|----------|----------------|----------------|--------------|----------|-----------|
| 1            | 72.234   | 2595840        | 94.664         | 9867         |          |           |
| 2            | 85.847   | 146308         | 5.336          | 1143         |          |           |
| <b>Total</b> |          | <b>2742148</b> | <b>100.000</b> | <b>11010</b> |          |           |

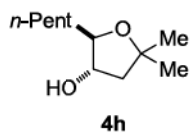

Data File: c:\star\8-5-13 3:33:10 pm -1.run  
 Channel: 3 = 210.00 nm RESULTS  
 Sample ID: cw418ed-rac  
 Operator (Inj): OD-H, hex:IPA= 95:5, 1.0 mL/min  
 Injection Date:  
 Injection Method: c:\star\chuan\standard 5%.mth  
 Run Time (min): 27.093  
 Workstation:  
 Instrument (Inj): Varian Star #1

Operator (Calc):  
 Calc Date: 08/05/13 04:01:11 PM  
 Times Calculated: 1  
 Calculation Method: c:\windows\temp\~8-5-13 3:33:10 pm  
 Instrument (Calc): Varian Star #1  
 Run Mode: Analysis  
 Peak Measurement: Peak Area  
 Calculation Type: Percent  
 Calibration Level: N/A  
 Verification Tolerance: N/A

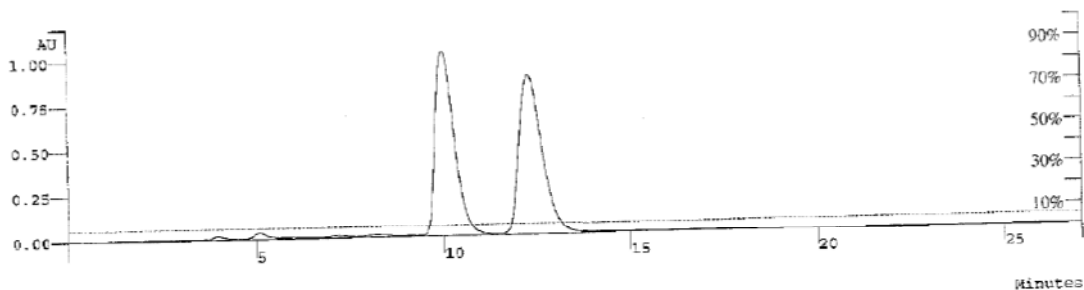

| Peak No       | Peak Name | Result ()       | Ret. Time (min) | Time Offset (min) | Area (counts)    | Rel Ret Time | Sep. Code | Width 1/2 (sec) | Status Codes | Group |
|---------------|-----------|-----------------|-----------------|-------------------|------------------|--------------|-----------|-----------------|--------------|-------|
| 1             |           | 49.1763         | 10.013          | 0.000             | 184714528        | 0.00         | BB        | 32.9            |              | 0     |
| 2             |           | 50.8237         | 12.280          | 0.000             | 190902192        | 0.00         | BB        | 39.1            |              | 0     |
| <b>Totals</b> |           | <b>100.0000</b> |                 | <b>0.000</b>      | <b>375616704</b> |              |           |                 |              |       |

Data File: c:\star\8-8-13 1:50:13 pm -1.run  
 Channel: 3 = 210.00 nm RESULTS  
 Sample ID: cw418ed-c  
 Operator (Inj): OD-H, hex:IPA= 95:5, 1.0 mL/min  
 Injection Date:  
 Injection Method: c:\star\chuan\standard 5%.mth  
 Run Time (min): 19.653  
 Workstation:  
 Instrument (Inj): Varian Star #1

Operator (Calc):  
 Calc Date: 08/08/13 02:13:47 PM  
 Times Calculated: 1  
 Calculation Method: c:\windows\temp\~8-8-13 1:50:13 pm  
 Instrument (Calc): Varian Star #1  
 Run Mode: Analysis  
 Peak Measurement: Peak Area  
 Calculation Type: Percent  
 Calibration Level: N/A  
 Verification Tolerance: N/A

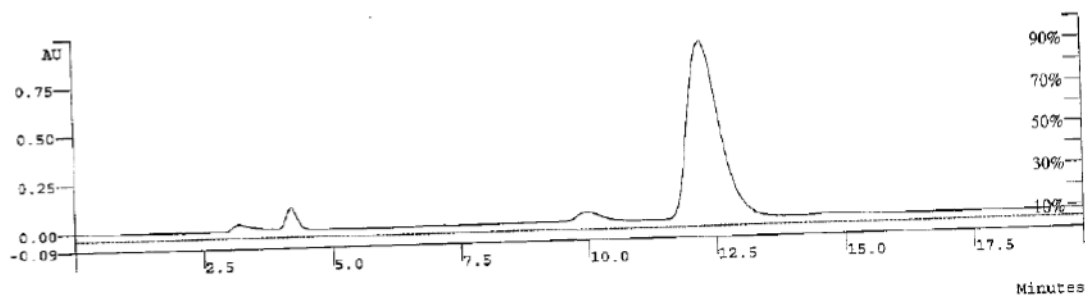

| Peak No       | Peak Name | Result ()       | Ret. Time (min) | Time Offset (min) | Area (counts)    | Rel Ret Time | Sep. Code | Width 1/2 (sec) | Status Codes | Group |
|---------------|-----------|-----------------|-----------------|-------------------|------------------|--------------|-----------|-----------------|--------------|-------|
| 1             |           | 3.7683          | 9.960           | 0.000             | 7812011          | 0.00         | BB        | 30.1            |              | 0     |
| 2             |           | 96.2317         | 12.200          | 0.000             | 199497936        | 0.00         | BB        | 39.7            |              | 0     |
| <b>Totals</b> |           | <b>100.0000</b> |                 | <b>0.000</b>      | <b>207309952</b> |              |           |                 |              |       |

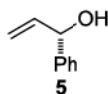

Data File: c:\star\8-5-13 6:29:29 pm -1.run  
 Channel: 3 = 210.00 nm RESULTS  
 Sample ID: cw418pr-rac  
 Operator (Inj): OD-H, hex:IPA=98.5:1.5, 1.0  
 Injection Date: mL/min  
 Injection Method: c:\star\chuan\standard 1.5%.mth  
 Run Time (min): 70.107  
 Workstation:  
 Instrument (Inj): Varian Star #1

Operator (Calc):  
 Calc Date: 08/05/13 07:42:14 PM  
 Times Calculated: 1  
 Calculation Method: c:\windows\temp\~8-5-13 6:29:29 pm  
 Instrument (Calc): Varian Star #1  
 Run Mode: Analysis  
 Peak Measurement: Peak Area  
 Calculation Type: Percent  
 Calibration Level: N/A  
 Verification Tolerance: N/A

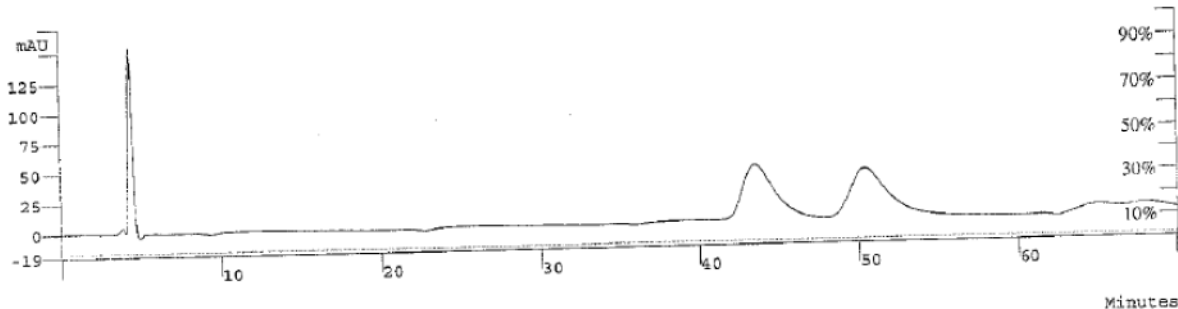

| Peak No       | Peak Name | Result ()       | Ret. Time (min) | Time Offset (min) | Area (counts)   | Rel Ret Time | Sep. Code | Width 1/2 (sec) | Status Codes | Group |
|---------------|-----------|-----------------|-----------------|-------------------|-----------------|--------------|-----------|-----------------|--------------|-------|
| 1             |           | 49.2514         | 43.480          | 0.000             | 32235450        | 0.00         | BB        | 127.0           |              | 0     |
| 2             |           | 50.7486         | 50.360          | 0.000             | 33215394        | 0.00         | BB        | 142.2           |              | 0     |
| <b>Totals</b> |           | <b>100.0000</b> |                 | <b>0.000</b>      | <b>65450844</b> |              |           |                 |              |       |

Data File: c:\star\8-8-13 2:55:47 pm -1.run  
 Channel: 3 = 210.00 nm RESULTS  
 Sample ID: cw418b  
 Operator (Inj): OD-H, hex:IPA=98.5:1.5, 1.0  
 Injection Date: mL/min  
 Injection Method: c:\star\chuan\standard 1.5%.mth  
 Run Time (min): 72.053  
 Workstation:  
 Instrument (Inj): Varian Star #1

Operator (Calc):  
 Calc Date: 08/13/13 05:19:18 PM  
 Times Calculated: 2  
 Calculation Method: c:\windows\temp\~8-12-13 12:07:00  
 Instrument (Calc): Varian Star #1  
 Run Mode: Analysis  
 Peak Measurement: Peak Area  
 Calculation Type: Percent  
 Calibration Level: N/A  
 Verification Tolerance: N/A

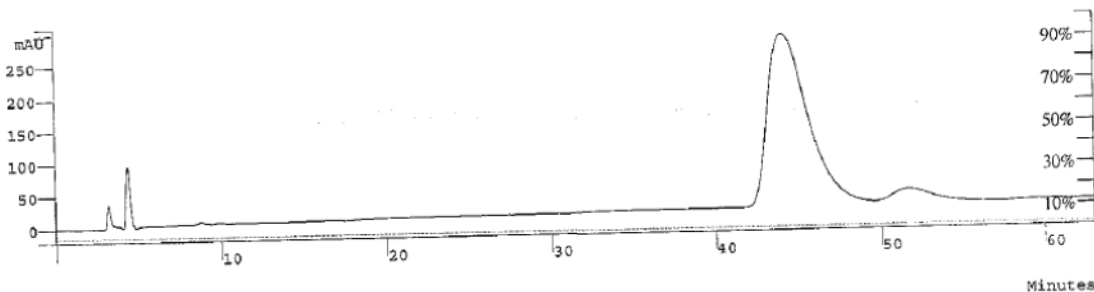

| Peak No       | Peak Name | Result ()       | Ret. Time (min) | Time Offset (min) | Area (counts)    | Rel Ret Time | Sep. Code | Width 1/2 (sec) | Status Codes | Group |
|---------------|-----------|-----------------|-----------------|-------------------|------------------|--------------|-----------|-----------------|--------------|-------|
| 1             |           | 95.6938         | 44.067          | 0.000             | 224631008        | 0.00         | BB        | 157.0           |              | 0     |
| 2             |           | 4.3062          | 51.667          | 0.000             | 10108422         | 0.00         | BB        | 109.9           |              | 0     |
| <b>Totals</b> |           | <b>100.0000</b> |                 | <b>0.000</b>      | <b>234739424</b> |              |           |                 |              |       |

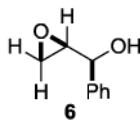

Supplement: ja411379e_si_001.pdf [file ja411379e_si_001.pdf]
